# Supplementary material for: Global Transcriptome and Deletome Profiles of Yeast Exposed to Transition Metals
Source: PLoS Genet. 2008 Apr 25;4(4):e1000053. doi: 10.1371/journal.pgen.1000053 (PMC2278374; doi:10.1371/journal.pgen.1000053)
Supplement: Table S6 — Z-scores for Gene Ontology terms presented in Figure 5. Scores were calculated using GenMAPP. (2.59 MB XLS) [file pgen.1000053.s008.xls]

## Sheet: All Metals sensitive GO_library
Supplemental Table 6
Z-scores for Gene Ontology terms presented in Figure 4.
	Deletome							Transcriptome
								Down regulated genes														Up-Regulated Genes
GO Biological Process	Mut_Ag (20uM)	Mut_As (1250uM)	Mut_Cd (25uM)	Mut_Cr (900uM)	Mut_Cu (7000uM)	Mut_Hg (47uM)	Mut_Zn (2000uM)	Ag10D	Ag20D	As400D	As1250D	Cd5D	Cu5000D	Hg18D	Hg46D	Cu9000D	Zn1000D	Zn2000D	Cr400D	Cr1700D	Cd25D	Ag10U	Ag20U	As400U	As1250U	Cd5U	Hg18U	Hg46U	Cu9000U	Zn1000U	Zn2000U	Cr400U	Cr1700U	Cu5000U	Cd25U
(R,R)-butanediol dehydrogenase activity	-0.039	-0.122	-0.23	-0.153	-0.185	-0.032	-0.163	-0.127	-0.16	6.194	-0.273	-0.113	-0.128	-0.169	-0.124	-0.211	-0.178	-0.19	-0.144	-0.134	-0.108	-0.151	-0.166	-0.22	-0.34	-0.132	-0.154	-0.163	-0.224	-0.16	-0.185	-0.164	-0.149	-0.176	-0.132
de novo IMP biosynthesis								-0.423	-0.53	-0.536	1.472	-0.375		-0.562	-0.411	0.791	-0.591	-0.632	-0.478	1.857	2.473	-0.5	-0.552	-0.731	-1.13	-0.438	-0.511	-0.542	-0.744	-0.53	-0.613	-0.544	-0.496	-0.585	-0.439
de novo protein folding								-0.221	-0.276	-0.28	1.802	-0.196		-0.293	-0.214	-0.366	-0.308	-0.33	-0.25	-0.231	-0.187	-0.261	-0.288	-0.382	-0.59	-0.229	-0.267	-0.283	-0.388	-0.277	-0.32	-0.284	-0.259	-0.305	-0.229
de novo pyrimidine base biosynthesis								-0.361	-0.452	-0.457	-0.772	-0.32		-0.479	-0.35	1.152	-0.504	-0.539	-0.408	-0.378	-0.305	-0.427	-0.471	-0.624	0.196	-0.374	-0.436	-0.462	-0.634	-0.452	-0.522	-0.464	-0.423	-0.499	-0.374
[acyl-carrier protein] S-acetyltransferase activity								-0.127	-0.16	-0.161	3.666	-0.113	-0.128	-0.169	-0.124	-0.211	-0.178	-0.19	-0.144	-0.134	-0.108	-0.151	-0.166	-0.22	-0.34	-0.132	-0.154	-0.163	-0.224	-0.16	-0.185	-0.164	-0.149	-0.176	-0.132
[acyl-carrier protein] S-malonyltransferase activity	-0.039	-0.122	-0.23	-0.153	-0.185	-0.032	-0.163	-0.18	-0.226	-0.228	2.4	-0.16	-0.181	-0.239	-0.175	-0.299	-0.252	-0.269	-0.204	-0.189	-0.153	-0.213	-0.235	-0.312	-0.482	-0.187	-0.218	-0.231	-0.317	-0.226	-0.261	-0.232	-0.211	-0.249	-0.187
[cytochrome c]-lysine N-methyltransferase activity	-0.039	-0.122	-0.23	-0.153	-0.185	-0.032	-0.163	-0.127	-0.16	-0.161	-0.273	-0.113	-0.128	-0.169	-0.124	-0.211	-0.178	-0.19	-0.144	-0.134	-0.108	-0.151	-0.166	-0.22	-0.34	-0.132	-0.154	-0.163	-0.224	-0.16	-0.185	-0.164	-0.149	-0.176	-0.132
de novo IMP biosynthesis	-0.11	-0.345	-0.65	-0.434	-0.525	-0.09	-0.462
de novo protein folding	-0.067	-0.211	-0.398	-0.265	-0.321	-0.055	-0.283
de novo pyrimidine base biosynthesis	-0.087	-0.272	-0.514	-0.343	-0.415	-0.071	-0.365
1-(5-phosphoribosyl)-5-[(5-phosphoribosylamino)methylideneamino]imidazole-4-carboxamide isomerase activity	-0.039	-0.122	-0.23	-0.153	-0.185	-0.032	-0.163	-0.127	-0.16	-0.161	-0.273	-0.113	-0.128	-0.169	-0.124	-0.211	-0.178	-0.19	-0.144	-0.134	-0.108	-0.151	-0.166	-0.22	-0.34	-0.132	-0.154	-0.163	-0.224	-0.16	-0.185	-0.164	-0.149	-0.176	-0.132
1\,3-beta-glucan synthase activity	-0.067	-0.211	-0.398	-0.265	-0.321	-0.055	-0.283	-0.221	-0.276	-0.28	-0.473	-0.196	-0.222	-0.293	-0.214	-0.366	-0.308	-0.33	-0.25	-0.231	-0.187	-0.261	-0.288	2.367	1.303	-0.229	-0.267	3.347	2.319	-0.277	-0.32	3.333	3.691	-0.305	4.219
1\,3-beta-glucan synthase complex	-0.067	-0.211	-0.398	-0.265	-0.321	-0.055	-0.283	-0.255	-0.319	-0.323	-0.546	-0.226	-0.257	-0.339	-0.247	-0.423	-0.356	-0.381	-0.288	-0.267	-0.216	-0.301	-0.333	1.94	0.958	-0.264	-0.308	2.817	1.896	-0.319	-0.369	2.805	3.122	-0.353	3.588
1\,3-beta-glucanosyltransferase activity	-0.039	-0.122	-0.23	-0.153	-0.185	-0.032	-0.163	-0.127	-0.16	-0.161	-0.273	-0.113	-0.128	-0.169	-0.124	-0.211	-0.178	-0.19	-0.144	-0.134	-0.108	-0.151	-0.166	-0.22	-0.34	-0.132	-0.154	-0.163	-0.224	-0.16	-0.185	-0.164	-0.149	-0.176	-0.132
1\,4-alpha-glucan branching enzyme activity	-0.039	-0.122	-0.23	-0.153	-0.185	-0.032	-0.163	-0.127	-0.16	6.194	-0.273	8.846	-0.128	5.906	8.087	-0.211	5.621	5.251	-0.144	-0.134	-0.108	-0.151	-0.166	-0.22	-0.34	-0.132	-0.154	-0.163	-0.224	-0.16	-0.185	-0.164	-0.149	-0.176	-0.132
1-acylglycerol-3-phosphate O-acyltransferase activity	-0.039	-0.122	-0.23	-0.153	-0.185	-0.032	-0.163	-0.127	-0.16	-0.161	-0.273	-0.113	-0.128	-0.169	-0.124	-0.211	-0.178	-0.19	-0.144	-0.134	-0.108	-0.151	-0.166	-0.22	-0.34	-0.132	-0.154	-0.163	-0.224	-0.16	-0.185	-0.164	-0.149	-0.176	-0.132
1-aminocyclopropane-1-carboxylate synthase activity	-0.067	-0.211	-0.398	-0.265	-0.321	-0.055	-0.283	-0.221	-0.276	-0.28	-0.473	-0.196	-0.222	-0.293	-0.214	-0.366	-0.308	-0.33	-0.25	-0.231	-0.187	-0.261	-0.288	2.367	3.196	-0.229	-0.267	-0.283	2.319	-0.277	-0.32	-0.284	-0.259	3.072	-0.229
1-phosphatidylinositol 4-kinase activity	-0.039	-0.122	-0.23	-0.153	-0.185	-0.032	-0.163	-0.221	-0.276	-0.28	-0.473	-0.196	-0.222	-0.293	-0.214	-0.366	-0.308	-0.33	-0.25	-0.231	-0.187	-0.261	-0.288	2.367	1.303	-0.229	-0.267	-0.283	-0.388	-0.277	-0.32	-0.284	-0.259	-0.305	-0.229
1-phosphatidylinositol-3-phosphate 5-kinase activity	-0.039	-0.122	4.353	-0.153	-0.185	-0.032	-0.163	-0.127	-0.16	-0.161	-0.273	-0.113	-0.128	-0.169	-0.124	-0.211	-0.178	-0.19	-0.144	-0.134	-0.108	-0.151	-0.166	-0.22	-0.34	-0.132	-0.154	-0.163	-0.224	-0.16	-0.185	-0.164	-0.149	-0.176	-0.132
1-phosphatidylinositol-4-phosphate 5-kinase activity	-0.039	-0.122	4.353	-0.153	-0.185	-0.032	-0.163	-0.18	-0.226	-0.228	-0.386	-0.16	-0.181	-0.239	-0.175	-0.299	-0.252	-0.269	-0.204	-0.189	-0.153	-0.213	-0.235	-0.312	-0.482	-0.187	-0.218	-0.231	-0.317	-0.226	-0.261	-0.232	-0.211	-0.249	-0.187
1-pyrroline-5-carboxylate dehydrogenase activity	-0.039	-0.122	-0.23	-0.153	-0.185	-0.032	-0.163	-0.127	-0.16	-0.161	-0.273	-0.113	-0.128	-0.169	-0.124	-0.211	-0.178	-0.19	-0.144	-0.134	-0.108	-0.151	-0.166	-0.22	-0.34	-0.132	-0.154	-0.163	-0.224	-0.16	-0.185	-0.164	-0.149	-0.176	-0.132
2,3-cyclic-nucleotide 3-phosphodiesterase activity								-0.127	-0.16	-0.161	-0.273	-0.113		-0.169	-0.124	-0.211	-0.178	-0.19	-0.144	-0.134	-0.108	-0.151	-0.166	-0.22	-0.34	-0.132	-0.154	-0.163	-0.224	-0.16	-0.185	-0.164	-0.149	-0.176	-0.132
2-phosphotransferase activity								-0.127	-0.16	-0.161	-0.273	-0.113		-0.169	-0.124	-0.211	-0.178	-0.19	-0.144	-0.134	-0.108	-0.151	-0.166	-0.22	-0.34	-0.132	-0.154	-0.163	-0.224	-0.16	-0.185	-0.164	-0.149	-0.176	-0.132
2,4-dienoyl-CoA reductase (NADPH) activity	-0.039	-0.122	-0.23	-0.153	-0.185	-0.032	-0.163	-0.127	-0.16	-0.161	-0.273	-0.113	-0.128	-0.169	-0.124	-0.211	-0.178	-0.19	-0.144	-0.134	-0.108	-0.151	-0.166	-0.22	-0.34	-0.132	-0.154	-0.163	-0.224	-0.16	-0.185	-0.164	-0.149	-0.176	-0.132
2,-cyclic-nucleotide 3-phosphodiesterase activity	-0.039	-0.122	-0.23	-0.153	-0.185	-0.032	-0.163
2-amino-4-hydroxy-6-hydroxymethyldihydropteridine diphosphokinase activity								-0.127	-0.16	-0.161	-0.273	-0.113	-0.128	-0.169	-0.124	-0.211	-0.178	-0.19	-0.144	-0.134	-0.108	-0.151	-0.166	4.539	2.937	-0.132	-0.154	-0.163	-0.224	-0.16	-0.185	-0.164	-0.149	-0.176	-0.132
2-dehydropantoate 2-reductase activity	-0.039	-0.122	-0.23	-0.153	-0.185	-0.032	-0.163	-0.18	-0.226	-0.228	-0.386	-0.16	-0.181	-0.239	-0.175	-0.299	-0.252	-0.269	-0.204	-0.189	-0.153	-0.213	-0.235	-0.312	-0.482	-0.187	-0.218	-0.231	-0.317	-0.226	-0.261	-0.232	-0.211	-0.249	-0.187
2-deoxyglucose-6-phosphatase activity	-0.055	-0.172	-0.325	-0.217	-0.262	-0.045	-0.231	-0.18	4.318	-0.228	2.4	-0.16	-0.181	-0.239	-0.175	-0.299	-0.252	3.578	-0.204	-0.189	-0.153	-0.213	-0.235	-0.312	-0.482	-0.187	-0.218	-0.231	-0.317	-0.226	-0.261	-0.232	-0.211	-0.249	-0.187
2-isopropylmalate synthase activity	-0.055	-0.172	-0.325	-0.217	-0.262	-0.045	-0.231	-0.18	-0.226	-0.228	2.4	-0.16	-0.181	-0.239	-0.175	-0.299	-0.252	-0.269	-0.204	-0.189	-0.153	-0.213	-0.235	-0.312	1.836	-0.187	-0.218	-0.231	-0.317	-0.226	-0.261	-0.232	-0.211	-0.249	-0.187
2-oxoglutarate metabolism	-0.055	-0.172	-0.325	-0.217	-0.262	-0.045	-0.231	-0.18	-0.226	-0.228	-0.386	-0.16	-0.181	-0.239	-0.175	-0.299	-0.252	-0.269	-0.204	-0.189	-0.153	-0.213	-0.235	-0.312	-0.482	-0.187	-0.218	-0.231	2.998	-0.226	-0.261	-0.232	-0.211	-0.249	-0.187
2-polyprenyl-6-methoxy-1\,4-benzoquinone methyltransferase activity	-0.055	-0.172	-0.325	-0.217	-0.262	-0.045	-0.231	-0.18	-0.226	-0.228	-0.386	-0.16	-0.181	-0.239	-0.175	-0.299	-0.252	-0.269	-0.204	-0.189	-0.153	-0.213	-0.235	-0.312	-0.482	-0.187	-0.218	-0.231	-0.317	-0.226	-0.261	-0.232	-0.211	-0.249	-0.187
3,5-bisphosphate nucleotidase activity								-0.127	-0.16	-0.161	-0.273	-0.113		-0.169	-0.124	-0.211	-0.178	-0.19	-0.144	-0.134	-0.108	-0.151	-0.166	-0.22	-0.34	-0.132	-0.154	-0.163	-0.224	-0.16	-0.185	-0.164	-0.149	-0.176	-0.132
3,5-cAMP binding								-0.127	-0.16	-0.161	-0.273	-0.113		-0.169	-0.124	-0.211	-0.178	-0.19	-0.144	-0.134	-0.108	-0.151	-0.166	-0.22	-0.34	-0.132	-0.154	-0.163	-0.224	-0.16	-0.185	-0.164	-0.149	-0.176	-0.132
3,5-cyclic-nucleotide phosphodiesterase activity								-0.18	-0.226	-0.228	-0.386	-0.16		-0.239	-0.175	-0.299	-0.252	-0.269	-0.204	-0.189	-0.153	-0.213	-0.235	-0.312	-0.482	-0.187	-0.218	-0.231	-0.317	-0.226	-0.261	-0.232	-0.211	-0.249	-0.187
3-5 exonuclease activity								-0.712	-0.891	-0.901	0.605	-0.631		-0.945	-0.69	3.274	-0.993	-1.063	-0.805	-0.745	-0.602	-0.841	-0.929	-1.23	-0.72	-0.737	-0.86	-0.912	-1.251	-0.891	-0.021	-0.915	-0.834	-0.984	-0.738
3-5-exodeoxyribonuclease activity								-0.127	-0.16	-0.161	-0.273	-0.113		-0.169	-0.124	-0.211	-0.178	-0.19	-0.144	-0.134	-0.108	-0.151	-0.166	-0.22	-0.34	-0.132	-0.154	-0.163	-0.224	-0.16	-0.185	-0.164	-0.149	-0.176	-0.132
3-5-exoribonuclease activity								-0.557	-0.697	-0.705	0.619	-0.494		-0.739	-0.54	2.487	-0.777	-0.832	-0.629	-0.583	-0.471	-0.658	-0.726	-0.962	-1.487	-0.577	-0.672	-0.713	-0.978	-0.697	0.482	-0.716	-0.653	-0.77	-0.577
3-tRNA processing endoribonuclease activity								-0.127	-0.16	-0.161	-0.273	-0.113		-0.169	-0.124	-0.211	-0.178	-0.19	-0.144	-0.134	-0.108	-0.151	-0.166	-0.22	-0.34	-0.132	-0.154	-0.163	-0.224	-0.16	-0.185	-0.164	-0.149	-0.176	-0.132
3,4-dihydroxy-2-butanone-4-phosphate synthase activity								-0.127	-0.16	-0.161	-0.273	-0.113	-0.128	-0.169	-0.124	-0.211	-0.178	-0.19	-0.144	-0.134	-0.108	-0.151	-0.166	-0.22	-0.34	-0.132	-0.154	-0.163	-0.224	-0.16	-0.185	-0.164	-0.149	-0.176	-0.132
3,5-bisphosphate nucleotidase activity	-0.039	-0.122	-0.23	-0.153	-0.185	-0.032	6.126
3,5-cAMP binding	-0.039	8.213	4.353	-0.153	-0.185	-0.032	-0.163
3,5-cyclic-nucleotide phosphodiesterase activity	-0.055	5.722	-0.325	-0.217	-0.262	-0.045	4.217
3-5 exonuclease activity	-0.151	-0.472	2.665	4.59	0.723	-0.123	2.62
3-5-exodeoxyribonuclease activity	-0.039	-0.122	-0.23	-0.153	-0.185	-0.032	-0.163
3-5-exoribonuclease activity	-0.103	-0.322	4.592	7.176	1.619	-0.084	4.326
35S primary transcript processing	-0.067	-0.211	-0.398	-0.265	-0.321	-0.055	-0.283	-0.942	-1.179	-1.192	1.218	-0.835	1.219	-1.25	-0.913	11.29	-1.314	-1.407	-1.064	-0.986	-0.796	3.528	6.378	-0.325	-2.514	1.132	3.409	-1.206	-1.655	0.579	3.235	3.929	-1.104	-1.302	2.185
3-beta-hydroxy-delta5-steroid dehydrogenase activity								-0.127	-0.16	-0.161	3.666	-0.113	-0.128	-0.169	-0.124	-0.211	-0.178	-0.19	-0.144	-0.134	-0.108	-0.151	-0.166	-0.22	-0.34	-0.132	-0.154	-0.163	-0.224	-0.16	-0.185	-0.164	-0.149	-0.176	-0.132
3-dehydroquinate dehydratase activity	-0.039	-0.122	-0.23	-0.153	-0.185	-0.032	-0.163	-0.127	-0.16	-0.161	-0.273	-0.113	-0.128	-0.169	-0.124	-0.211	-0.178	-0.19	-0.144	-0.134	-0.108	-0.151	-0.166	-0.22	-0.34	-0.132	-0.154	-0.163	-0.224	-0.16	-0.185	-0.164	-0.149	-0.176	-0.132
3-dehydroquinate synthase activity	-0.039	-0.122	-0.23	-0.153	-0.185	-0.032	-0.163	-0.127	-0.16	-0.161	-0.273	-0.113	-0.128	-0.169	-0.124	-0.211	-0.178	-0.19	-0.144	-0.134	-0.108	-0.151	-0.166	-0.22	-0.34	-0.132	-0.154	-0.163	-0.224	-0.16	-0.185	-0.164	-0.149	-0.176	-0.132
3-deoxy-7-phosphoheptulonate synthase activity	18.148	-0.172	-0.325	-0.217	-0.262	-0.045	-0.231	-0.18	-0.226	-0.228	-0.386	-0.16	-0.181	-0.239	-0.175	-0.299	-0.252	-0.269	-0.204	-0.189	-0.153	-0.213	-0.235	-0.312	-0.482	-0.187	-0.218	-0.231	-0.317	-0.226	-0.261	-0.232	-0.211	-0.249	-0.187
3-hydroxyacyl-[acyl-carrier protein] dehydratase activity	-0.039	-0.122	4.353	-0.153	-0.185	-0.032	-0.163	-0.18	-0.226	-0.228	2.4	-0.16	-0.181	-0.239	-0.175	-0.299	-0.252	-0.269	-0.204	-0.189	-0.153	-0.213	-0.235	-0.312	-0.482	-0.187	-0.218	-0.231	-0.317	-0.226	-0.261	-0.232	-0.211	-0.249	-0.187
3-hydroxyanthranilate 3\,4-dioxygenase activity	-0.039	-0.122	-0.23	-0.153	-0.185	-0.032	-0.163	-0.127	-0.16	-0.161	-0.273	-0.113	-0.128	-0.169	-0.124	-0.211	-0.178	-0.19	-0.144	-0.134	-0.108	-0.151	-0.166	-0.22	-0.34	-0.132	-0.154	-0.163	-0.224	-0.16	-0.185	-0.164	-0.149	-0.176	-0.132
3-hydroxyisobutyryl-CoA hydrolase activity	-0.039	-0.122	-0.23	-0.153	-0.185	-0.032	-0.163	-0.127	-0.16	-0.161	-0.273	-0.113	-0.128	-0.169	-0.124	-0.211	-0.178	-0.19	-0.144	-0.134	-0.108	-0.151	-0.166	-0.22	-0.34	-0.132	-0.154	-0.163	-0.224	-0.16	-0.185	-0.164	-0.149	-0.176	-0.132
3-hydroxypalmitoyl-[acyl-carrier protein] dehydratase activity								-0.127	-0.16	-0.161	3.666	-0.113	-0.128	-0.169	-0.124	-0.211	-0.178	-0.19	-0.144	-0.134	-0.108	-0.151	-0.166	-0.22	-0.34	-0.132	-0.154	-0.163	-0.224	-0.16	-0.185	-0.164	-0.149	-0.176	-0.132
3-isopropylmalate dehydratase activity	-0.039	-0.122	-0.23	-0.153	-0.185	-0.032	-0.163	-0.127	-0.16	-0.161	-0.273	-0.113	-0.128	-0.169	-0.124	-0.211	-0.178	5.251	-0.144	7.49	-0.108	-0.151	-0.166	-0.22	2.937	-0.132	-0.154	-0.163	-0.224	-0.16	-0.185	-0.164	-0.149	-0.176	-0.132
3-isopropylmalate dehydratase complex	-0.039	-0.122	-0.23	-0.153	-0.185	-0.032	-0.163	-0.127	-0.16	-0.161	-0.273	-0.113	-0.128	-0.169	-0.124	-0.211	-0.178	5.251	-0.144	7.49	-0.108	-0.151	-0.166	-0.22	2.937	-0.132	-0.154	-0.163	-0.224	-0.16	-0.185	-0.164	-0.149	-0.176	-0.132
3-isopropylmalate dehydrogenase activity								-0.127	-0.16	-0.161	-0.273	-0.113	-0.128	-0.169	-0.124	-0.211	-0.178	-0.19	-0.144	-0.134	-0.108	-0.151	-0.166	-0.22	-0.34	-0.132	-0.154	-0.163	-0.224	-0.16	-0.185	-0.164	-0.149	-0.176	-0.132
3-keto sterol reductase activity								-0.127	-0.16	-0.161	-0.273	-0.113	-0.128	-0.169	-0.124	-0.211	-0.178	-0.19	-0.144	-0.134	-0.108	-0.151	-0.166	-0.22	-0.34	-0.132	-0.154	-0.163	-0.224	-0.16	-0.185	-0.164	-0.149	-0.176	-0.132
3-keto-sphinganine metabolism								-0.127	-0.16	-0.161	-0.273	-0.113	-0.128	-0.169	-0.124	-0.211	-0.178	-0.19	-0.144	-0.134	-0.108	-0.151	-0.166	-0.22	-0.34	-0.132	-0.154	-0.163	-0.224	-0.16	-0.185	-0.164	-0.149	-0.176	-0.132
3-methyl-2-oxobutanoate hydroxymethyltransferase activity	-0.039	-0.122	-0.23	-0.153	-0.185	-0.032	-0.163	-0.127	-0.16	-0.161	-0.273	-0.113	-0.128	-0.169	-0.124	-0.211	-0.178	-0.19	-0.144	-0.134	-0.108	-0.151	-0.166	-0.22	-0.34	-0.132	-0.154	-0.163	-0.224	-0.16	-0.185	-0.164	-0.149	-0.176	-0.132
3-oxoacyl-[acyl-carrier protein] reductase activity	-0.039	-0.122	-0.23	-0.153	-0.185	-0.032	-0.163	-0.18	-0.226	-0.228	2.4	-0.16	-0.181	-0.239	-0.175	-0.299	-0.252	-0.269	-0.204	-0.189	-0.153	-0.213	-0.235	-0.312	-0.482	-0.187	-0.218	-0.231	-0.317	-0.226	-0.261	-0.232	-0.211	-0.249	-0.187
3-oxoacyl-[acyl-carrier protein] synthase activity	-0.039	-0.122	4.353	-0.153	-0.185	-0.032	-0.163	-0.18	-0.226	-0.228	2.4	-0.16	-0.181	-0.239	-0.175	-0.299	-0.252	-0.269	-0.204	-0.189	-0.153	-0.213	-0.235	-0.312	-0.482	-0.187	-0.218	-0.231	-0.317	-0.226	-0.261	-0.232	-0.211	-0.249	-0.187
3-phosphoshikimate 1-carboxyvinyltransferase activity	-0.039	-0.122	-0.23	-0.153	-0.185	-0.032	-0.163	-0.127	-0.16	-0.161	-0.273	-0.113	-0.128	-0.169	-0.124	-0.211	-0.178	-0.19	-0.144	-0.134	-0.108	-0.151	-0.166	-0.22	-0.34	-0.132	-0.154	-0.163	-0.224	-0.16	-0.185	-0.164	-0.149	-0.176	-0.132
4-alpha-glucanotransferase activity	-0.039	-0.122	-0.23	-0.153	-0.185	-0.032	-0.163	-0.127	-0.16	-0.161	-0.273	-0.113	-0.128	5.906	-0.124	-0.211	-0.178	-0.19	-0.144	-0.134	-0.108	-0.151	-0.166	-0.22	2.937	-0.132	-0.154	-0.163	4.463	-0.16	-0.185	-0.164	-0.149	5.673	-0.132
4-alpha-hydroxytetrahydrobiopterin dehydratase activity								-0.127	-0.16	-0.161	-0.273	-0.113	-0.128	-0.169	-0.124	-0.211	-0.178	-0.19	-0.144	-0.134	-0.108	-0.151	-0.166	-0.22	-0.34	-0.132	-0.154	-0.163	-0.224	6.265	-0.185	-0.164	-0.149	-0.176	-0.132
4-amino-4-deoxychorismate synthase activity	-0.039	-0.122	-0.23	-0.153	-0.185	-0.032	-0.163	-0.127	-0.16	-0.161	-0.273	-0.113	-0.128	-0.169	-0.124	-0.211	-0.178	-0.19	-0.144	-0.134	-0.108	-0.151	-0.166	-0.22	-0.34	-0.132	-0.154	-0.163	-0.224	-0.16	-0.185	-0.164	-0.149	-0.176	-0.132
4-aminobutyrate transaminase activity	-0.039	-0.122	-0.23	-0.153	-0.185	-0.032	-0.163	-0.127	-0.16	-0.161	-0.273	-0.113	-0.128	5.906	-0.124	-0.211	-0.178	-0.19	-0.144	-0.134	-0.108	-0.151	-0.166	-0.22	-0.34	-0.132	-0.154	-0.163	-0.224	-0.16	-0.185	-0.164	-0.149	-0.176	-0.132
4-nitrophenylphosphatase activity	-0.039	-0.122	-0.23	-0.153	-0.185	-0.032	-0.163	-0.127	-0.16	-0.161	-0.273	-0.113	-0.128	-0.169	-0.124	-0.211	-0.178	-0.19	-0.144	-0.134	-0.108	-0.151	-0.166	-0.22	-0.34	-0.132	-0.154	-0.163	-0.224	-0.16	-0.185	-0.164	-0.149	-0.176	-0.132
3-5 exonuclease activity								-0.255	-0.319	-0.323	-0.546	-0.226		-0.339	-0.247	-0.423	-0.356	-0.381	-0.288	-0.267	-0.216	-0.301	-0.333	-0.441	-0.681	-0.264	-0.308	-0.327	-0.448	-0.319	-0.369	-0.328	-0.299	-0.353	-0.264
3-5 exoribonuclease activity								-0.18	-0.226	-0.228	-0.386	-0.16		-0.239	-0.175	-0.299	-0.252	-0.269	-0.204	-0.189	-0.153	-0.213	-0.235	-0.312	-0.482	-0.187	-0.218	-0.231	-0.317	-0.226	-0.261	-0.232	-0.211	-0.249	-0.187
5-flap endonuclease activity								-0.255	-0.319	-0.323	-0.546	-0.226		-0.339	-0.247	-0.423	-0.356	-0.381	-0.288	-0.267	-0.216	-0.301	-0.333	-0.441	-0.681	-0.264	-0.308	-0.327	-0.448	-0.319	-0.369	-0.328	-0.299	-0.353	-0.264
5-nucleotidase activity								-0.127	-0.16	-0.161	-0.273	-0.113		-0.169	-0.124	-0.211	-0.178	-0.19	-0.144	-0.134	-0.108	-0.151	-0.166	-0.22	-0.34	-0.132	-0.154	-0.163	-0.224	-0.16	-0.185	-0.164	-0.149	-0.176	-0.132
5\,10-methylenetetrahydrofolate-dependent methyltransferase activity	-0.055	-0.172	2.916	-0.217	-0.262	-0.045	-0.231	-0.221	-0.276	-0.28	-0.473	-0.196	-0.222	-0.293	-0.214	-0.366	-0.308	-0.33	-0.25	-0.231	-0.187	-0.261	-0.288	2.367	1.303	-0.229	-0.267	-0.283	-0.388	-0.277	-0.32	-0.284	-0.259	-0.305	-0.229
5 exonuclease activity	-0.055	-0.172	-0.325	-0.217	-0.262	-0.045	-0.231
5-flap endonuclease activity	-0.078	-0.244	1.833	-0.306	-0.371	-0.064	-0.327
5-nucleotidase activity	-0.039	-0.122	-0.23	-0.153	-0.185	-0.032	-0.163
5-amino-6-(5-phosphoribosylamino)uracil reductase activity								-0.127	-0.16	-0.161	-0.273	-0.113	-0.128	-0.169	-0.124	-0.211	-0.178	-0.19	-0.144	-0.134	-0.108	-0.151	-0.166	-0.22	-0.34	-0.132	-0.154	-0.163	-0.224	-0.16	-0.185	-0.164	-0.149	-0.176	-0.132
5-aminolevulinate synthase activity								-0.127	-0.16	-0.161	-0.273	-0.113	-0.128	-0.169	-0.124	-0.211	-0.178	-0.19	-0.144	-0.134	-0.108	-0.151	-0.166	-0.22	-0.34	-0.132	-0.154	-0.163	-0.224	-0.16	-0.185	-0.164	-0.149	-0.176	-0.132
5-formyltetrahydrofolate cyclo-ligase activity	-0.039	-0.122	-0.23	-0.153	-0.185	-0.032	-0.163	-0.127	-0.16	-0.161	-0.273	-0.113	-0.128	-0.169	-0.124	-0.211	-0.178	-0.19	-0.144	-0.134	-0.108	-0.151	-0.166	-0.22	-0.34	-0.132	-0.154	-0.163	-0.224	-0.16	-0.185	-0.164	-0.149	-0.176	-0.132
5-methyltetrahydropteroyltriglutamate-homocysteine S-methyltransferase activity	-0.039	-0.122	-0.23	-0.153	-0.185	-0.032	-0.163	-0.127	-0.16	-0.161	-0.273	-0.113	-0.128	-0.169	-0.124	-0.211	-0.178	-0.19	-0.144	-0.134	-0.108	-0.151	-0.166	4.539	2.937	-0.132	-0.154	-0.163	4.463	-0.16	-0.185	-0.164	-0.149	5.673	-0.132
5-methyltetrahydropteroyltri-L-glutamate-dependent methyltransferase activity	-0.039	-0.122	-0.23	-0.153	-0.185	-0.032	-0.163	-0.127	-0.16	-0.161	-0.273	-0.113	-0.128	-0.169	-0.124	-0.211	-0.178	-0.19	-0.144	-0.134	-0.108	-0.151	-0.166	4.539	2.937	-0.132	-0.154	-0.163	4.463	-0.16	-0.185	-0.164	-0.149	5.673	-0.132
5S rRNA binding								-0.18	-0.226	-0.228	-0.386	-0.16	-0.181	-0.239	-0.175	3.198	-0.252	-0.269	-0.204	-0.189	-0.153	-0.213	-0.235	-0.312	-0.482	-0.187	-0.218	-0.231	-0.317	-0.226	-0.261	-0.232	-0.211	-0.249	-0.187
6\,7-dimethyl-8-ribityllumazine synthase activity	-0.039	-0.122	-0.23	-0.153	-0.185	-0.032	-0.163	-0.127	-0.16	-0.161	3.666	-0.113	-0.128	-0.169	-0.124	-0.211	-0.178	-0.19	-0.144	-0.134	-0.108	-0.151	-0.166	-0.22	-0.34	-0.132	-0.154	-0.163	-0.224	-0.16	-0.185	-0.164	-0.149	-0.176	-0.132
6-phosphofructo-2-kinase activity	-0.055	-0.172	2.916	-0.217	-0.262	-0.045	-0.231	-0.18	-0.226	-0.228	-0.386	-0.16	-0.181	-0.239	-0.175	-0.299	-0.252	3.578	-0.204	-0.189	-0.153	-0.213	-0.235	-0.312	-0.482	-0.187	-0.218	-0.231	-0.317	-0.226	-0.261	-0.232	-0.211	-0.249	-0.187
6-phosphofructokinase activity	-0.055	-0.172	2.916	4.508	-0.262	-0.045	4.217	-0.18	-0.226	-0.228	-0.386	-0.16	-0.181	-0.239	-0.175	-0.299	-0.252	-0.269	-0.204	-0.189	-0.153	-0.213	-0.235	-0.312	-0.482	-0.187	-0.218	-0.231	-0.317	-0.226	-0.261	-0.232	-0.211	-0.249	-0.187
6-phosphofructokinase complex	-0.055	-0.172	2.916	4.508	-0.262	-0.045	4.217	-0.18	-0.226	-0.228	-0.386	-0.16	-0.181	-0.239	-0.175	-0.299	-0.252	-0.269	-0.204	-0.189	-0.153	-0.213	-0.235	-0.312	-0.482	-0.187	-0.218	-0.231	-0.317	-0.226	-0.261	-0.232	-0.211	-0.249	-0.187
6-phosphogluconolactonase activity	-0.078	-0.244	-0.46	-0.306	-0.371	-0.064	-0.327	-0.255	-0.319	-0.323	1.424	-0.226	-0.257	-0.339	-0.247	-0.423	-0.356	-0.381	-0.288	-0.267	-0.216	-0.301	-0.333	-0.441	-0.681	-0.264	-0.308	-0.327	1.896	-0.319	-0.369	-0.328	-0.299	2.573	-0.264
7S RNA binding								-0.127	-0.16	-0.161	3.666	-0.113	-0.128	-0.169	-0.124	-0.211	-0.178	-0.19	-0.144	-0.134	-0.108	-0.151	-0.166	-0.22	-0.34	-0.132	-0.154	-0.163	-0.224	-0.16	-0.185	-0.164	-0.149	-0.176	-0.132
90S preribosome								-0.255	-0.319	-0.323	-0.546	-0.226	-0.257	-0.339	-0.247	9.47	-0.356	-0.381	-0.288	-0.267	-0.216	-0.301	-0.333	-0.441	-0.681	-0.264	-0.308	-0.327	-0.448	-0.319	-0.369	-0.328	-0.299	-0.353	-0.264
acetate biosynthesis	-0.039	-0.122	-0.23	-0.153	-0.185	-0.032	-0.163	-0.255	-0.319	-0.323	-0.546	-0.226	-0.257	-0.339	-0.247	2.051	-0.356	-0.381	-0.288	-0.267	-0.216	-0.301	-0.333	-0.441	-0.681	-0.264	-0.308	-0.327	-0.448	-0.319	-0.369	-0.328	-0.299	-0.353	-0.264
acetate biosynthesis from carbon monoxide	-0.078	-0.244	-0.46	-0.306	-0.371	-0.064	-0.327	-0.127	-0.16	-0.161	-0.273	-0.113	-0.128	-0.169	-0.124	-0.211	-0.178	-0.19	-0.144	-0.134	-0.108	-0.151	-0.166	-0.22	-0.34	-0.132	-0.154	-0.163	-0.224	-0.16	-0.185	-0.164	-0.149	-0.176	-0.132
acetate derivative biosynthesis	-0.039	-0.122	-0.23	-0.153	-0.185	-0.032	-0.163	-0.127	-0.16	-0.161	-0.273	-0.113	-0.128	-0.169	-0.124	-0.211	-0.178	-0.19	-0.144	-0.134	-0.108	-0.151	-0.166	-0.22	-0.34	-0.132	-0.154	-0.163	-0.224	-0.16	-0.185	-0.164	-0.149	-0.176	-0.132
acetate derivative metabolism	-0.039	-0.122	-0.23	-0.153	-0.185	-0.032	-0.163	-0.127	-0.16	-0.161	-0.273	-0.113	-0.128	-0.169	-0.124	-0.211	-0.178	-0.19	-0.144	-0.134	-0.108	-0.151	-0.166	-0.22	-0.34	-0.132	-0.154	-0.163	-0.224	-0.16	-0.185	-0.164	-0.149	-0.176	-0.132
acetate fermentation	-0.039	-0.122	-0.23	-0.153	-0.185	-0.032	-0.163	-0.127	-0.16	-0.161	-0.273	-0.113	-0.128	-0.169	-0.124	-0.211	-0.178	-0.19	-0.144	-0.134	-0.108	-0.151	-0.166	-0.22	2.937	-0.132	-0.154	-0.163	-0.224	-0.16	-0.185	-0.164	-0.149	-0.176	-0.132
acetate metabolism	-0.103	-0.322	-0.608	-0.406	-0.491	-0.084	-0.432	-0.338	-0.423	-0.427	-0.722	-0.299	-0.34	-0.448	-0.327	1.311	-0.471	-0.504	-0.381	-0.353	-0.285	-0.399	-0.44	-0.583	0.338	-0.35	-0.408	-0.432	-0.593	-0.423	-0.489	-0.434	-0.396	1.745	-0.35
acetate transport	-0.039	-0.122	-0.23	-0.153	-0.185	-0.032	-0.163	-0.127	-0.16	-0.161	-0.273	-0.113	-0.128	-0.169	-0.124	-0.211	-0.178	-0.19	-0.144	-0.134	-0.108	-0.151	-0.166	-0.22	-0.34	-0.132	-0.154	-0.163	-0.224	-0.16	-0.185	-0.164	-0.149	-0.176	-0.132
acetate transporter activity	-0.039	-0.122	-0.23	-0.153	-0.185	-0.032	-0.163	-0.127	-0.16	-0.161	-0.273	-0.113	-0.128	-0.169	-0.124	-0.211	-0.178	-0.19	-0.144	-0.134	-0.108	-0.151	-0.166	-0.22	-0.34	-0.132	-0.154	-0.163	-0.224	-0.16	-0.185	-0.164	-0.149	-0.176	-0.132
acetate-CoA ligase activity	-0.039	-0.122	-0.23	-0.153	-0.185	-0.032	-0.163	-0.18	-0.226	-0.228	2.4	-0.16	-0.181	-0.239	-0.175	-0.299	-0.252	-0.269	-0.204	-0.189	-0.153	-0.213	-0.235	-0.312	1.836	-0.187	-0.218	-0.231	-0.317	-0.226	-0.261	-0.232	-0.211	-0.249	-0.187
acetolactate synthase activity	-0.039	-0.122	-0.23	-0.153	-0.185	-0.032	-0.163	-0.18	-0.226	-0.228	-0.386	-0.16	-0.181	-0.239	-0.175	-0.299	-0.252	-0.269	-0.204	-0.189	-0.153	-0.213	-0.235	-0.312	-0.482	-0.187	-0.218	-0.231	-0.317	-0.226	-0.261	-0.232	-0.211	-0.249	-0.187
acetyl-CoA biosynthesis	-0.039	-0.122	-0.23	-0.153	-0.185	-0.032	-0.163	-0.221	-0.276	-0.28	1.802	-0.196	-0.222	-0.293	-0.214	-0.366	-0.308	-0.33	-0.25	-0.231	-0.187	-0.261	-0.288	-0.382	1.303	-0.229	-0.267	-0.283	-0.388	-0.277	-0.32	-0.284	-0.259	-0.305	-0.229
acetyl-CoA biosynthesis from pyruvate	-0.055	-0.172	-0.325	-0.217	-0.262	-0.045	-0.231	-0.127	-0.16	-0.161	-0.273	-0.113	-0.128	-0.169	-0.124	-0.211	-0.178	-0.19	-0.144	-0.134	-0.108	-0.151	-0.166	-0.22	-0.34	-0.132	-0.154	-0.163	-0.224	-0.16	-0.185	-0.164	-0.149	-0.176	-0.132
acetyl-CoA C-acetyltransferase activity								-0.127	-0.16	-0.161	-0.273	-0.113	-0.128	-0.169	-0.124	-0.211	-0.178	-0.19	-0.144	-0.134	-0.108	-0.151	-0.166	-0.22	-0.34	-0.132	-0.154	-0.163	-0.224	-0.16	-0.185	-0.164	-0.149	-0.176	-0.132
acetyl-CoA C-acyltransferase activity	-0.039	-0.122	-0.23	-0.153	-0.185	-0.032	-0.163	-0.127	-0.16	-0.161	-0.273	-0.113	-0.128	-0.169	-0.124	-0.211	-0.178	-0.19	-0.144	-0.134	-0.108	-0.151	-0.166	-0.22	2.937	-0.132	-0.154	-0.163	-0.224	-0.16	-0.185	-0.164	-0.149	-0.176	-0.132
acetyl-CoA carboxylase activity								-0.127	-0.16	-0.161	3.666	-0.113	-0.128	-0.169	-0.124	-0.211	-0.178	-0.19	-0.144	-0.134	-0.108	-0.151	-0.166	-0.22	-0.34	-0.132	-0.154	-0.163	-0.224	-0.16	-0.185	-0.164	-0.149	-0.176	-0.132
acetyl-CoA carboxylase complex								-0.127	-0.16	-0.161	3.666	-0.113	-0.128	-0.169	-0.124	-0.211	-0.178	-0.19	-0.144	-0.134	-0.108	-0.151	-0.166	-0.22	-0.34	-0.132	-0.154	-0.163	-0.224	-0.16	-0.185	-0.164	-0.149	-0.176	-0.132
acetyl-CoA catabolism	-0.203	-0.635	-0.313	-0.799	-0.967	-0.166	-0.851	0.796	2.727	0.312	-1.473	-0.61	0.782	0.217	-0.668	0.701	3.358	7.076	0.541	0.698	1.164	0.45	0.253	-1.19	1.823	0.722	-0.831	1.459	1.408	-0.862	1.09	0.281	0.467	1.226	0.721
acetyl-CoA hydrolase activity	-0.039	-0.122	-0.23	-0.153	-0.185	-0.032	-0.163	-0.127	-0.16	-0.161	-0.273	-0.113	-0.128	-0.169	-0.124	-0.211	-0.178	-0.19	-0.144	-0.134	-0.108	-0.151	-0.166	-0.22	-0.34	-0.132	-0.154	-0.163	-0.224	-0.16	-0.185	-0.164	-0.149	5.673	-0.132
acetyl-CoA metabolism	-0.214	-0.669	-0.423	-0.842	-1.02	-0.175	-0.897	0.626	2.383	0.149	-0.24	-0.661	0.612	0.055	-0.723	0.466	2.95	6.375	0.376	0.531	0.983	0.286	0.09	-1.289	1.956	0.553	-0.901	1.208	1.109	-0.934	0.849	0.119	0.303	1.988	0.552
acetylglucosaminyltransferase activity	-0.067	-0.211	-0.398	-0.265	-0.321	-0.055	-0.283	-0.361	-0.452	-0.457	-0.772	-0.32	-0.363	-0.479	-0.35	-0.598	-0.504	-0.539	-0.408	-0.378	-0.305	-0.427	-0.471	-0.624	-0.964	-0.374	-0.436	-0.462	-0.634	-0.452	-0.522	-0.464	-0.423	-0.499	-0.374
acetylglutamate kinase activity	-0.055	-0.172	-0.325	-0.217	-0.262	-0.045	-0.231	-0.18	-0.226	-0.228	-0.386	-0.16	-0.181	-0.239	-0.175	-0.299	-0.252	-0.269	-0.204	-0.189	-0.153	-0.213	-0.235	-0.312	1.836	-0.187	-0.218	4.215	-0.317	-0.226	-0.261	-0.232	-0.211	-0.249	-0.187
acetylornithine transaminase activity								-0.127	-0.16	-0.161	-0.273	-0.113	-0.128	-0.169	-0.124	4.734	-0.178	-0.19	-0.144	-0.134	-0.108	-0.151	-0.166	-0.22	-0.34	-0.132	-0.154	-0.163	-0.224	-0.16	-0.185	-0.164	-0.149	-0.176	-0.132
acetyltransferase activity	-0.234	0.661	-0.617	0.195	-1.118	-0.191	-0.984	0.268	-0.179	-0.202	3.241	-0.787	0.255	0.583	-0.861	-0.036	0.443	-0.536	0.024	-0.929	-0.75	0.919	0.635	0.537	0.007	2.432	0.856	2.509	-0.2	0.752	0.341	0.675	0.944	0.469	1.314
acid phosphatase activity	-0.078	-0.244	-0.46	-0.306	-0.371	-0.064	-0.327	-0.312	-0.391	-0.396	5.767	-0.277	2.921	-0.415	-0.303	7.561	-0.436	-0.467	5.434	12.127	3.567	-0.369	-0.408	-0.54	0.504	-0.324	-0.377	-0.4	-0.549	-0.391	-0.452	-0.402	-0.366	-0.432	-0.324
acid-amino acid ligase activity	-0.319	0.037	2.1	1.233	0.558	-0.26	-0.556	-1.227	-0.856	-1.553	-1.375	-0.14	-0.397	0.298	-0.322	-1.51	-0.485	-1.257	-0.637	-0.479	-0.046	-1.45	-1.6	-1.617	-0.85	-1.27	-1.481	-0.907	-1.66	-1.536	-1.775	-1.577	-1.438	-1.696	-1.271
acid-ammonia (or amide) ligase activity								-0.127	6.266	-0.161	-0.273	-0.113	-0.128	-0.169	-0.124	-0.211	-0.178	-0.19	-0.144	7.49	9.273	-0.151	-0.166	-0.22	-0.34	-0.132	-0.154	-0.163	-0.224	-0.16	-0.185	-0.164	-0.149	-0.176	-0.132
acidic amino acid transport	-0.039	-0.122	-0.23	-0.153	-0.185	-0.032	-0.163	-0.127	-0.16	-0.161	-0.273	-0.113	-0.128	-0.169	-0.124	-0.211	-0.178	-0.19	-0.144	-0.134	-0.108	-0.151	-0.166	-0.22	-0.34	-0.132	-0.154	-0.163	-0.224	-0.16	-0.185	-0.164	-0.149	-0.176	-0.132
acidic amino acid transporter activity	-0.039	-0.122	-0.23	-0.153	-0.185	-0.032	-0.163	-0.127	-0.16	-0.161	-0.273	-0.113	-0.128	-0.169	-0.124	-0.211	-0.178	-0.19	-0.144	-0.134	-0.108	-0.151	-0.166	-0.22	-0.34	-0.132	-0.154	-0.163	-0.224	-0.16	-0.185	-0.164	-0.149	-0.176	-0.132
acid-thiol ligase activity	-0.067	-0.211	-0.398	-0.265	-0.321	-0.055	-0.283	-0.255	-0.319	-0.323	1.424	-0.226	-0.257	-0.339	-0.247	-0.423	-0.356	-0.381	-0.288	-0.267	-0.216	-0.301	-0.333	-0.441	0.958	-0.264	-0.308	-0.327	-0.448	-0.319	-0.369	-0.328	-0.299	-0.353	-0.264
aconitate hydratase activity	-0.055	-0.172	2.916	-0.217	-0.262	-0.045	-0.231	-0.18	-0.226	-0.228	-0.386	-0.16	5.42	-0.239	-0.175	3.198	3.849	3.578	-0.204	-0.189	-0.153	-0.213	-0.235	-0.312	-0.482	-0.187	-0.218	-0.231	-0.317	-0.226	-0.261	-0.232	-0.211	-0.249	-0.187
actin binding	-0.179	1.264	0.95	5.143	6.469	-0.146	-0.75	-0.7	-0.877	-0.887	-0.777	-0.621	-0.705	-0.93	-0.679	-1.16	-0.977	-1.046	-0.791	-0.733	-0.592	-0.828	-0.913	-1.21	-1.27	-0.725	-0.846	-0.897	-1.231	-0.877	-1.014	-0.9	0.432	-0.968	-0.726
actin cable	-0.055	-0.172	2.916	4.508	3.682	-0.045	-0.231	-0.285	-0.357	-0.361	1.152	-0.253	-0.287	-0.379	-0.277	-0.473	-0.398	-0.426	-0.322	-0.299	-0.241	-0.337	-0.372	-0.493	-0.762	-0.295	-0.344	-0.365	-0.501	-0.357	-0.413	-0.367	-0.334	-0.394	-0.295
actin cable formation	-0.067	-0.211	2.249	7.451	6.121	-0.055	-0.283	-0.221	-0.276	-0.28	1.802	-0.196	-0.222	-0.293	-0.214	-0.366	-0.308	-0.33	-0.25	-0.231	-0.187	-0.261	-0.288	-0.382	-0.59	-0.229	-0.267	-0.283	-0.388	-0.277	-0.32	-0.284	-0.259	-0.305	-0.229
actin cap	-0.123	-0.385	-0.727	-0.485	1.179	-0.101	-0.517	-0.494	-0.619	-0.626	-0.039	-0.438	-0.498	-0.657	-0.48	-0.819	-0.69	-0.739	-0.559	-0.518	-0.418	-0.584	-0.645	0.376	-0.473	-0.512	-0.597	0.992	0.343	-0.619	-0.716	0.983	1.189	-0.684	1.479
actin cortical patch	-0.123	-0.385	-0.727	1.63	1.179	-0.101	-0.517	-0.789	-0.987	-0.999	-1.687	-0.699	-0.794	-1.047	-0.765	-1.307	-1.101	-1.178	-0.891	-0.826	-0.667	-0.932	-1.029	-1.363	-2.106	-0.817	-0.952	-1.01	-1.386	-0.987	-1.142	-1.014	-0.924	-1.09	-0.817
actin cortical patch assembly	-0.221	0.788	0.322	5.059	6.866	-0.18	0.189	-0.46	-0.576	-0.583	-0.985	-0.408	-0.463	-0.611	-0.446	-0.763	-0.642	-0.687	-0.52	-0.482	-0.389	-0.544	-0.6	-0.795	-1.229	-0.477	-0.556	-0.59	-0.809	-0.576	-0.666	-0.592	1.36	-0.636	-0.477
actin cytoskeleton	-0.333	2.922	1.303	6.634	7.035	-0.272	0.098	-1.254	-1.57	-1.588	-1.052	-1.112	-1.262	-1.665	-1.216	-1.054	-1.75	-1.873	-1.417	-1.313	-1.061	-0.779	-0.996	-1.181	-2.33	-1.299	-1.514	-0.305	-0.748	-0.24	-1.235	-0.964	-0.762	-1.734	-0.502
actin cytoskeleton organization and biogenesis	-0.055	-0.172	-0.325	-0.217	3.682	-0.045	-0.231	-1.261	-1.578	-1.596	-0.263	-1.118	-1.269	-1.674	-1.223	-1.07	-1.759	-1.883	-1.425	-1.32	-1.066	-1.49	-1.644	-1.198	-2.353	-0.512	-0.838	-0.967	-2.215	-1.578	-1.824	-1.621	-0.773	-1.14	-1.306
actin cytoskeleton reorganization	-0.326	-0.008	1.414	4.396	6.574	-0.266	0.924	-0.221	-0.276	-0.28	-0.473	-0.196	-0.222	-0.293	-0.214	-0.366	-0.308	-0.33	-0.25	-0.231	-0.187	-0.261	-0.288	-0.382	-0.59	-0.229	-0.267	-0.283	-0.388	-0.277	-0.32	-0.284	-0.259	-0.305	-0.229
actin filament	-0.11	-0.345	0.971	4.295	3.422	-0.09	-0.462	-0.285	-0.357	-0.361	-0.61	-0.253	-0.287	-0.379	-0.277	-0.473	-0.398	-0.426	-0.322	-0.299	-0.241	-0.337	-0.372	-0.493	-0.762	-0.295	-0.344	-0.365	-0.501	-0.357	-0.413	-0.367	-0.334	-0.394	-0.295
actin filament binding	-0.055	-0.172	2.916	4.508	3.682	-0.045	-0.231	-0.361	-0.452	-0.457	0.621	-0.32	-0.363	-0.479	-0.35	-0.598	-0.504	-0.539	-0.408	-0.378	-0.305	-0.427	-0.471	-0.624	-0.964	-0.374	-0.436	-0.462	-0.634	-0.452	-0.522	-0.464	-0.423	-0.499	-0.374
actin filament bundle formation	-0.055	-0.172	-0.325	-0.217	-0.262	-0.045	-0.231	-0.221	-0.276	-0.28	1.802	-0.196	-0.222	-0.293	-0.214	-0.366	-0.308	-0.33	-0.25	-0.231	-0.187	-0.261	-0.288	-0.382	-0.59	-0.229	-0.267	-0.283	-0.388	-0.277	-0.32	-0.284	-0.259	-0.305	-0.229
actin filament capping	-0.067	-0.211	-0.398	-0.265	-0.321	-0.055	-0.283	-0.18	-0.226	-0.228	-0.386	-0.16	-0.181	-0.239	-0.175	-0.299	-0.252	-0.269	-0.204	-0.189	-0.153	-0.213	-0.235	-0.312	-0.482	-0.187	-0.218	-0.231	-0.317	-0.226	-0.261	-0.232	-0.211	-0.249	-0.187
actin filament depolymerization	-0.253	3.085	2.058	6.256	7.443	-0.207	0.888	-0.255	-0.319	-0.323	-0.546	-0.226	-0.257	-0.339	-0.247	-0.423	-0.356	-0.381	-0.288	-0.267	-0.216	-0.301	-0.333	-0.441	-0.681	-0.264	-0.308	-0.327	-0.448	-0.319	-0.369	-0.328	-0.299	-0.353	-0.264
actin filament organization	-0.055	-0.172	-0.325	4.508	3.682	-0.045	-0.231	-0.959	-1.201	-1.215	-0.465	-0.85	-0.965	-1.274	-0.93	-1.589	-1.338	-1.433	-1.084	-1.004	-0.811	-1.134	-1.251	-1.018	-1.681	-0.993	-1.158	-1.229	-1.685	-1.201	-1.388	-1.233	-1.124	-1.326	-0.994
actin filament polymerization	-0.055	-0.172	-0.325	-0.217	3.682	-0.045	-0.231	-0.285	-0.357	-0.361	-0.61	-0.253	-0.287	-0.379	-0.277	-0.473	-0.398	-0.426	-0.322	-0.299	-0.241	-0.337	-0.372	-0.493	-0.762	-0.295	-0.344	-0.365	-0.501	-0.357	-0.413	-0.367	-0.334	-0.394	-0.295
actin filament reorganization during cell cycle	-0.34	2.821	1.197	6.449	6.831	-0.278	0.772	-0.221	-0.276	-0.28	-0.473	-0.196	-0.222	-0.293	-0.214	-0.366	-0.308	-0.33	-0.25	-0.231	-0.187	-0.261	-0.288	-0.382	-0.59	-0.229	-0.267	-0.283	-0.388	-0.277	-0.32	-0.284	-0.259	-0.305	-0.229
actin filament severing								-0.127	-0.16	-0.161	-0.273	-0.113	-0.128	-0.169	-0.124	-0.211	-0.178	-0.19	-0.144	-0.134	-0.108	-0.151	-0.166	-0.22	-0.34	-0.132	-0.154	-0.163	-0.224	-0.16	-0.185	-0.164	-0.149	-0.176	-0.132
actin filament-based movement								-0.127	-0.16	-0.161	-0.273	-0.113	-0.128	-0.169	-0.124	-0.211	-0.178	-0.19	-0.144	-0.134	-0.108	-0.151	-0.166	-0.22	-0.34	-0.132	-0.154	-0.163	-0.224	-0.16	-0.185	-0.164	-0.149	-0.176	-0.132
actin filament-based process	-0.078	-0.244	-0.46	-0.306	2.419	-0.064	-0.327	-1.287	-1.611	-1.63	-0.368	-1.141	-1.295	-1.709	-1.248	-1.134	-1.796	-1.923	-1.455	-1.348	-1.089	-1.521	-1.679	-1.263	-2.444	-0.555	-0.883	-1.014	-2.262	-1.611	-1.863	-1.655	-0.818	-1.189	-1.333
actin lateral binding	-0.055	-0.172	2.916	4.508	3.682	-0.045	-0.231	-0.18	-0.226	-0.228	2.4	-0.16	-0.181	-0.239	-0.175	-0.299	-0.252	-0.269	-0.204	-0.189	-0.153	-0.213	-0.235	-0.312	-0.482	-0.187	-0.218	-0.231	-0.317	-0.226	-0.261	-0.232	-0.211	-0.249	-0.187
actin monomer binding	-0.039	-0.122	-0.23	-0.153	-0.185	-0.032	-0.163	-0.18	-0.226	-0.228	-0.386	-0.16	-0.181	-0.239	-0.175	-0.299	-0.252	-0.269	-0.204	-0.189	-0.153	-0.213	-0.235	-0.312	-0.482	-0.187	-0.218	-0.231	-0.317	-0.226	-0.261	-0.232	-0.211	-0.249	-0.187
actin nucleation	-0.039	-0.122	-0.23	-0.153	5.392	-0.032	-0.163	-0.18	-0.226	-0.228	-0.386	-0.16	-0.181	-0.239	-0.175	-0.299	-0.252	-0.269	-0.204	-0.189	-0.153	-0.213	-0.235	-0.312	-0.482	-0.187	-0.218	-0.231	-0.317	-0.226	-0.261	-0.232	-0.211	-0.249	-0.187
actin polymerization and/or depolymerization	-0.103	-0.322	1.125	4.649	3.728	-0.084	-0.432	-0.46	-0.576	-0.583	0.109	-0.408	-0.463	-0.611	-0.446	-0.763	-0.642	-0.687	-0.52	-0.482	-0.389	-0.544	-0.6	-0.795	-1.229	-0.477	-0.556	-0.59	-0.809	-0.576	-0.666	-0.592	-0.539	-0.636	-0.477
activation of MAPK activity	-0.039	8.213	-0.23	-0.153	-0.185	-0.032	-0.163	-0.127	-0.16	-0.161	-0.273	-0.113	-0.128	-0.169	-0.124	-0.211	-0.178	-0.19	-0.144	-0.134	-0.108	-0.151	-0.166	-0.22	-0.34	-0.132	-0.154	-0.163	-0.224	-0.16	-0.185	-0.164	-0.149	-0.176	-0.132
activation of MAPK activity during osmolarity sensing	-0.039	8.213	-0.23	-0.153	-0.185	-0.032	-0.163	-0.127	-0.16	-0.161	-0.273	-0.113	-0.128	-0.169	-0.124	-0.211	-0.178	-0.19	-0.144	-0.134	-0.108	-0.151	-0.166	-0.22	-0.34	-0.132	-0.154	-0.163	-0.224	-0.16	-0.185	-0.164	-0.149	-0.176	-0.132
activation of MAPKK activity	-0.055	5.722	-0.325	-0.217	-0.262	-0.045	-0.231	-0.18	-0.226	-0.228	-0.386	-0.16	5.42	-0.239	-0.175	3.198	-0.252	-0.269	-0.204	-0.189	-0.153	-0.213	-0.235	-0.312	-0.482	-0.187	-0.218	-0.231	-0.317	-0.226	-0.261	-0.232	-0.211	-0.249	-0.187
activation of MAPKK activity during osmolarity sensing	-0.055	5.722	-0.325	-0.217	-0.262	-0.045	-0.231	-0.18	-0.226	-0.228	-0.386	-0.16	5.42	-0.239	-0.175	3.198	-0.252	-0.269	-0.204	-0.189	-0.153	-0.213	-0.235	-0.312	-0.482	-0.187	-0.218	-0.231	-0.317	-0.226	-0.261	-0.232	-0.211	-0.249	-0.187
actomyosin structure organization and biogenesis								-0.127	-0.16	-0.161	-0.273	-0.113	-0.128	-0.169	-0.124	4.734	-0.178	-0.19	-0.144	-0.134	-0.108	-0.151	-0.166	-0.22	-0.34	-0.132	-0.154	-0.163	-0.224	-0.16	-0.185	-0.164	-0.149	-0.176	-0.132
acyl carrier activity								-0.127	-0.16	-0.161	-0.273	-0.113	-0.128	-0.169	-0.124	-0.211	-0.178	-0.19	-0.144	-0.134	-0.108	-0.151	-0.166	-0.22	-0.34	-0.132	-0.154	-0.163	-0.224	-0.16	-0.185	-0.164	-0.149	-0.176	-0.132
acyl-[acyl-carrier protein] hydrolase activity								-0.127	-0.16	-0.161	3.666	-0.113	-0.128	-0.169	-0.124	-0.211	-0.178	-0.19	-0.144	-0.134	-0.108	-0.151	-0.166	-0.22	-0.34	-0.132	-0.154	-0.163	-0.224	-0.16	-0.185	-0.164	-0.149	-0.176	-0.132
acyl-CoA binding	-0.039	-0.122	-0.23	-0.153	-0.185	-0.032	-0.163	-0.127	-0.16	-0.161	-0.273	-0.113	-0.128	-0.169	-0.124	-0.211	-0.178	-0.19	-0.144	-0.134	-0.108	-0.151	-0.166	-0.22	-0.34	-0.132	-0.154	-0.163	-0.224	-0.16	-0.185	-0.164	-0.149	-0.176	-0.132
acyl-CoA metabolism	-0.039	-0.122	-0.23	-0.153	-0.185	-0.032	-0.163	-0.127	-0.16	-0.161	-0.273	-0.113	-0.128	-0.169	-0.124	-0.211	-0.178	-0.19	-0.144	-0.134	-0.108	-0.151	-0.166	-0.22	-0.34	-0.132	-0.154	-0.163	-0.224	-0.16	-0.185	-0.164	-0.149	-0.176	-0.132
acyl-CoA oxidase activity	-0.039	-0.122	-0.23	-0.153	-0.185	-0.032	-0.163	-0.127	-0.16	-0.161	-0.273	-0.113	-0.128	-0.169	-0.124	-0.211	-0.178	-0.19	-0.144	-0.134	-0.108	-0.151	-0.166	-0.22	-0.34	-0.132	-0.154	-0.163	-0.224	-0.16	-0.185	-0.164	-0.149	-0.176	-0.132
acyl-CoA thioesterase activity	-0.039	-0.122	-0.23	-0.153	-0.185	-0.032	-0.163	-0.127	-0.16	-0.161	-0.273	-0.113	-0.128	-0.169	-0.124	-0.211	-0.178	-0.19	-0.144	-0.134	-0.108	-0.151	-0.166	-0.22	-0.34	-0.132	-0.154	-0.163	-0.224	-0.16	-0.185	-0.164	-0.149	-0.176	-0.132
acylglycerol biosynthesis	-0.055	-0.172	-0.325	-0.217	-0.262	-0.045	-0.231	-0.18	-0.226	-0.228	-0.386	-0.16	-0.181	-0.239	-0.175	-0.299	-0.252	-0.269	-0.204	-0.189	-0.153	-0.213	-0.235	-0.312	-0.482	-0.187	-0.218	-0.231	-0.317	-0.226	-0.261	-0.232	-0.211	-0.249	-0.187
acylglycerol metabolism	-0.055	-0.172	-0.325	-0.217	-0.262	-0.045	-0.231	-0.18	-0.226	-0.228	-0.386	-0.16	-0.181	-0.239	-0.175	-0.299	-0.252	-0.269	-0.204	-0.189	-0.153	-0.213	-0.235	-0.312	-0.482	-0.187	-0.218	-0.231	-0.317	-0.226	-0.261	-0.232	-0.211	-0.249	-0.187
acylglycerol O-acyltransferase activity	-0.055	-0.172	-0.325	-0.217	-0.262	-0.045	-0.231	-0.18	-0.226	-0.228	-0.386	-0.16	-0.181	-0.239	-0.175	-0.299	-0.252	-0.269	-0.204	-0.189	-0.153	-0.213	-0.235	-0.312	-0.482	-0.187	-0.218	-0.231	-0.317	-0.226	-0.261	-0.232	-0.211	-0.249	-0.187
acylglycerone-phosphate reductase activity	-0.039	-0.122	-0.23	-0.153	-0.185	-0.032	-0.163	-0.127	-0.16	-0.161	-0.273	-0.113	-0.128	-0.169	-0.124	-0.211	-0.178	-0.19	-0.144	-0.134	-0.108	-0.151	-0.166	-0.22	-0.34	-0.132	-0.154	-0.163	-0.224	-0.16	-0.185	-0.164	-0.149	-0.176	-0.132
acyltransferase activity	-0.311	2.201	0.49	0.471	-1.484	-0.254	-0.507	-0.251	-0.714	-0.023	4.641	-1.019	-0.264	-0.157	-0.189	-0.233	0.356	-0.49	-0.5	-1.203	-0.972	0.171	-0.106	-0.377	-0.853	1.414	0.11	1.361	-0.963	0.009	-0.401	-0.066	0.194	-0.271	0.545
Ada2/Gcn5/Ada3 transcription activator complex	-0.078	12.263	6.417	-0.306	-0.371	-0.064	-0.327	-0.255	-0.319	-0.323	-0.546	-0.226	-0.257	-0.339	-0.247	-0.423	-0.356	-0.381	-0.288	-0.267	-0.216	-0.301	-0.333	-0.441	0.958	-0.264	-0.308	-0.327	-0.448	-0.319	-0.369	-0.328	-0.299	-0.353	-0.264
adaptation to pheromone during conjugation with cellular fusion	-0.135	-0.422	-0.797	1.4	0.969	-0.11	1.252	-0.46	-0.576	-0.583	1.203	-0.408	-0.463	-0.611	-0.446	-0.763	-0.642	-0.687	1.447	-0.482	-0.389	-0.544	-0.6	-0.795	-1.229	-0.477	-0.556	-0.59	-0.809	1.208	-0.666	1.147	1.36	-0.636	-0.477
adenine biosynthesis	-0.039	-0.122	-0.23	-0.153	-0.185	-0.032	-0.163	-0.127	-0.16	-0.161	-0.273	-0.113	-0.128	-0.169	-0.124	-0.211	-0.178	-0.19	-0.144	-0.134	-0.108	-0.151	-0.166	-0.22	-0.34	-0.132	-0.154	-0.163	-0.224	-0.16	-0.185	-0.164	-0.149	-0.176	-0.132
adenine deaminase activity	-0.039	-0.122	-0.23	-0.153	-0.185	-0.032	-0.163	-0.127	-0.16	-0.161	-0.273	-0.113	-0.128	-0.169	-0.124	-0.211	-0.178	-0.19	-0.144	-0.134	-0.108	-0.151	-0.166	-0.22	-0.34	7.573	6.495	-0.163	-0.224	-0.16	-0.185	-0.164	-0.149	-0.176	-0.132
adenine metabolism	-0.039	-0.122	-0.23	-0.153	-0.185	-0.032	-0.163	-0.127	-0.16	-0.161	-0.273	-0.113	-0.128	-0.169	-0.124	-0.211	-0.178	-0.19	-0.144	-0.134	-0.108	-0.151	-0.166	-0.22	-0.34	-0.132	-0.154	-0.163	-0.224	-0.16	-0.185	-0.164	-0.149	-0.176	-0.132
adenine nucleotide transport	-0.039	-0.122	-0.23	-0.153	-0.185	-0.032	-0.163	-0.18	-0.226	-0.228	-0.386	-0.16	-0.181	-0.239	-0.175	-0.299	-0.252	-0.269	-0.204	-0.189	-0.153	-0.213	-0.235	-0.312	-0.482	-0.187	-0.218	-0.231	-0.317	-0.226	-0.261	-0.232	-0.211	-0.249	-0.187
adenine nucleotide transporter activity	-0.039	-0.122	-0.23	-0.153	-0.185	-0.032	-0.163	-0.127	-0.16	-0.161	-0.273	-0.113	-0.128	-0.169	-0.124	-0.211	-0.178	-0.19	-0.144	-0.134	-0.108	-0.151	-0.166	-0.22	-0.34	-0.132	-0.154	-0.163	-0.224	-0.16	-0.185	-0.164	-0.149	-0.176	-0.132
adenine phosphoribosyltransferase activity	-0.039	-0.122	-0.23	-0.153	-0.185	-0.032	-0.163	-0.127	-0.16	-0.161	-0.273	-0.113	-0.128	-0.169	-0.124	-0.211	-0.178	-0.19	-0.144	-0.134	-0.108	-0.151	-0.166	-0.22	-0.34	-0.132	-0.154	-0.163	-0.224	-0.16	-0.185	-0.164	-0.149	-0.176	-0.132
adenosine biosynthesis	-0.039	-0.122	4.353	-0.153	-0.185	-0.032	-0.163	-0.127	-0.16	-0.161	-0.273	-0.113	-0.128	-0.169	-0.124	-0.211	-0.178	5.251	-0.144	-0.134	-0.108	-0.151	-0.166	-0.22	-0.34	-0.132	-0.154	-0.163	-0.224	-0.16	-0.185	-0.164	-0.149	-0.176	-0.132
adenosine deaminase activity	-0.055	-0.172	-0.325	-0.217	-0.262	-0.045	-0.231	-0.255	-0.319	-0.323	-0.546	-0.226	-0.257	-0.339	-0.247	-0.423	-0.356	-0.381	-0.288	-0.267	-0.216	-0.301	-0.333	-0.441	-0.681	3.589	3.017	-0.327	-0.448	-0.319	-0.369	-0.328	-0.299	-0.353	-0.264
adenosine kinase activity	-0.039	-0.122	4.353	6.528	-0.185	-0.032	-0.163	-0.127	-0.16	-0.161	-0.273	-0.113	-0.128	-0.169	-0.124	-0.211	-0.178	-0.19	-0.144	-0.134	-0.108	-0.151	-0.166	-0.22	-0.34	-0.132	-0.154	-0.163	-0.224	-0.16	-0.185	-0.164	-0.149	-0.176	-0.132
adenosine metabolism	-0.039	-0.122	4.353	-0.153	-0.185	-0.032	-0.163	-0.127	-0.16	-0.161	-0.273	-0.113	-0.128	-0.169	-0.124	-0.211	-0.178	5.251	-0.144	-0.134	-0.108	-0.151	-0.166	-0.22	-0.34	-0.132	-0.154	-0.163	-0.224	-0.16	-0.185	-0.164	-0.149	-0.176	-0.132
adenosylhomocysteinase activity								-0.127	-0.16	-0.161	-0.273	-0.113	-0.128	-0.169	-0.124	-0.211	-0.178	-0.19	-0.144	-0.134	-0.108	-0.151	-0.166	-0.22	-0.34	-0.132	-0.154	-0.163	-0.224	-0.16	-0.185	-0.164	-0.149	-0.176	-0.132
adenosylmethionine decarboxylase activity	-0.039	-0.122	-0.23	-0.153	-0.185	-0.032	-0.163	-0.127	-0.16	-0.161	-0.273	-0.113	-0.128	-0.169	-0.124	-0.211	-0.178	-0.19	-0.144	-0.134	-0.108	-0.151	-0.166	-0.22	-0.34	-0.132	-0.154	-0.163	-0.224	-0.16	-0.185	-0.164	-0.149	-0.176	-0.132
adenosylmethionine-8-amino-7-oxononanoate transaminase activity	-0.039	-0.122	-0.23	-0.153	-0.185	-0.032	-0.163	-0.127	6.266	-0.161	-0.273	-0.113	-0.128	-0.169	-0.124	-0.211	-0.178	-0.19	-0.144	-0.134	-0.108	-0.151	-0.166	-0.22	-0.34	-0.132	-0.154	-0.163	-0.224	-0.16	-0.185	-0.164	-0.149	-0.176	-0.132
adenyl nucleotide binding	0.722	2.419	2.131	1.637	0.581	-0.608	1.535	0.587	-0.307	-0.683	-3.686	-1.081	-0.912	-1.572	-1.475	-0.552	-1.894	-1.845	-0.221	-1.47	-0.878	-0.829	-1.173	0.59	3.234	-0.707	-0.049	-0.474	-0.667	-0.308	-1.105	-1.366	-1.72	-0.759	-0.71
adenylate cyclase activation	-0.039	-0.122	-0.23	-0.153	-0.185	-0.032	-0.163	-0.127	-0.16	-0.161	3.666	-0.113	-0.128	5.906	-0.124	-0.211	5.621	5.251	-0.144	-0.134	-0.108	-0.151	-0.166	-0.22	-0.34	-0.132	-0.154	-0.163	-0.224	-0.16	-0.185	-0.164	-0.149	-0.176	-0.132
adenylate cyclase activity								-0.127	-0.16	-0.161	-0.273	-0.113	-0.128	-0.169	-0.124	-0.211	-0.178	-0.19	-0.144	-0.134	-0.108	-0.151	-0.166	-0.22	-0.34	-0.132	-0.154	-0.163	4.463	-0.16	-0.185	-0.164	-0.149	-0.176	-0.132
adenylate cyclase binding	-0.039	-0.122	-0.23	-0.153	-0.185	-0.032	-0.163	-0.127	-0.16	-0.161	-0.273	-0.113	-0.128	-0.169	-0.124	-0.211	-0.178	-0.19	-0.144	-0.134	-0.108	-0.151	-0.166	-0.22	-0.34	-0.132	-0.154	-0.163	-0.224	-0.16	-0.185	-0.164	-0.149	-0.176	-0.132
adenylate kinase activity	-0.055	5.722	-0.325	-0.217	-0.262	-0.045	-0.231	-0.18	-0.226	-0.228	-0.386	-0.16	-0.181	-0.239	-0.175	-0.299	-0.252	-0.269	-0.204	-0.189	-0.153	-0.213	-0.235	-0.312	-0.482	-0.187	-0.218	-0.231	-0.317	-0.226	-0.261	-0.232	-0.211	-0.249	-0.187
adenyl-nucleotide exchange factor activity	-0.039	-0.122	-0.23	-0.153	-0.185	-0.032	-0.163	-0.18	-0.226	-0.228	2.4	-0.16	-0.181	-0.239	-0.175	-0.299	-0.252	-0.269	-0.204	-0.189	-0.153	-0.213	-0.235	3.054	1.836	-0.187	-0.218	-0.231	-0.317	-0.226	-0.261	-0.232	-0.211	-0.249	-0.187
adenylosuccinate lyase activity								-0.127	-0.16	-0.161	3.666	-0.113	-0.128	-0.169	-0.124	-0.211	-0.178	-0.19	-0.144	7.49	-0.108	-0.151	-0.166	-0.22	-0.34	-0.132	-0.154	-0.163	-0.224	-0.16	-0.185	-0.164	-0.149	-0.176	-0.132
adenylosuccinate synthase activity	-0.039	-0.122	4.353	-0.153	-0.185	-0.032	-0.163	-0.127	-0.16	-0.161	-0.273	-0.113	-0.128	-0.169	-0.124	-0.211	-0.178	5.251	-0.144	-0.134	-0.108	-0.151	-0.166	-0.22	-0.34	-0.132	-0.154	-0.163	-0.224	-0.16	-0.185	-0.164	-0.149	-0.176	-0.132
adenylylsulfate kinase activity	-0.039	-0.122	-0.23	-0.153	-0.185	-0.032	-0.163	-0.127	-0.16	-0.161	-0.273	-0.113	-0.128	-0.169	-0.124	-0.211	-0.178	-0.19	-0.144	-0.134	-0.108	-0.151	-0.166	4.539	2.937	-0.132	-0.154	6.123	4.463	-0.16	-0.185	6.099	6.691	5.673	7.57
ADP-ribose diphosphatase activity								-0.127	-0.16	6.194	-0.273	-0.113	-0.128	5.906	8.087	-0.211	5.621	5.251	-0.144	-0.134	-0.108	-0.151	-0.166	-0.22	-0.34	-0.132	-0.154	-0.163	-0.224	-0.16	-0.185	-0.164	-0.149	-0.176	-0.132
aerobic respiration	-0.349	-1.093	0.542	-1.375	-1.665	-0.285	-1.465	1.222	2.421	-0.272	-1.459	-0.184	-0.442	0.222	-0.366	-1.054	3.653	7.702	0.783	0.265	0.882	-0.779	-0.996	-1.181	0.723	0.297	-0.826	0.997	1.678	-1.57	-0.655	-0.316	-0.053	2.505	0.296
age-dependent general metabolic decline	-0.078	-0.244	-0.46	-0.306	-0.371	-0.064	-0.327	-0.338	-0.423	-0.427	-0.722	-0.299	-0.34	-0.448	-0.327	-0.559	-0.471	-0.504	-0.381	-0.353	-0.285	-0.399	-0.44	-0.583	1.578	-0.35	-0.408	-0.432	2.952	-0.423	-0.489	-0.434	-0.396	-0.467	-0.35
age-dependent general metabolic decline during chronological cell aging	-0.039	-0.122	-0.23	-0.153	-0.185	-0.032	-0.163	-0.312	-0.391	-0.396	-0.668	-0.277	-0.314	-0.415	-0.303	-0.518	-0.436	-0.467	-0.353	-0.327	-0.264	-0.369	-0.408	-0.54	1.843	-0.324	-0.377	-0.4	1.365	-0.391	-0.452	-0.402	-0.366	-0.432	-0.324
age-dependent general metabolic decline during replicative cell aging	-0.087	-0.272	-0.514	-0.343	-0.415	-0.071	-0.365	-0.127	-0.16	-0.161	-0.273	-0.113	-0.128	-0.169	-0.124	-0.211	-0.178	-0.19	-0.144	-0.134	-0.108	-0.151	-0.166	-0.22	-0.34	-0.132	-0.154	-0.163	4.463	-0.16	-0.185	-0.164	-0.149	-0.176	-0.132
age-dependent response to oxidative stress	-0.078	-0.244	-0.46	-0.306	-0.371	-0.064	-0.327	-0.312	-0.391	-0.396	-0.668	-0.277	-0.314	-0.415	-0.303	-0.518	-0.436	-0.467	-0.353	-0.327	-0.264	-0.369	-0.408	-0.54	1.843	-0.324	-0.377	-0.4	1.365	-0.391	-0.452	-0.402	-0.366	-0.432	-0.324
age-dependent response to oxidative stress during chronological cell aging	-0.078	-0.244	-0.46	-0.306	-0.371	-0.064	-0.327	-0.312	-0.391	-0.396	-0.668	-0.277	-0.314	-0.415	-0.303	-0.518	-0.436	-0.467	-0.353	-0.327	-0.264	-0.369	-0.408	-0.54	1.843	-0.324	-0.377	-0.4	1.365	-0.391	-0.452	-0.402	-0.366	-0.432	-0.324
agglutination	-0.067	-0.211	-0.398	-0.265	-0.321	-0.055	-0.283	-0.255	-0.319	-0.323	-0.546	-0.226	-0.257	-0.339	-0.247	-0.423	-0.356	-0.381	-0.288	-0.267	-0.216	-0.301	-0.333	-0.441	2.597	-0.264	-0.308	2.817	-0.448	-0.319	-0.369	-0.328	3.122	2.573	-0.264
agglutination during conjugation with cellular fusion	-0.067	-0.211	-0.398	-0.265	-0.321	-0.055	-0.283	-0.255	-0.319	-0.323	-0.546	-0.226	-0.257	-0.339	-0.247	-0.423	-0.356	-0.381	-0.288	-0.267	-0.216	-0.301	-0.333	-0.441	2.597	-0.264	-0.308	2.817	-0.448	-0.319	-0.369	-0.328	3.122	2.573	-0.264
aging	-0.183	-0.573	-0.101	0.708	-0.872	-0.149	-0.768	0.724	0.266	-0.901	0.605	0.982	-0.716	1.243	0.788	-1.179	1.096	0.897	-0.805	-0.745	-0.602	-0.841	-0.929	-1.23	0.46	-0.737	-0.86	-0.912	0.438	0.266	-1.03	0.213	0.398	-0.984	-0.738
alanine aminopeptidase activity	-0.078	-0.244	-0.46	-0.306	-0.371	-0.064	-0.327	-0.255	-0.319	-0.323	-0.546	-0.226	-0.257	-0.339	-0.247	-0.423	-0.356	-0.381	-0.288	-0.267	-0.216	3.093	2.758	-0.441	-0.681	-0.264	-0.308	-0.327	-0.448	-0.319	-0.369	-0.328	3.122	2.573	-0.264
alanine racemase activity	-0.039	-0.122	-0.23	-0.153	-0.185	-0.032	-0.163	-0.127	-0.16	-0.161	-0.273	-0.113	-0.128	-0.169	-0.124	-0.211	-0.178	-0.19	-0.144	-0.134	-0.108	-0.151	-0.166	-0.22	-0.34	-0.132	-0.154	-0.163	-0.224	-0.16	-0.185	-0.164	-0.149	-0.176	-0.132
alanine transaminase activity	-0.055	-0.172	-0.325	-0.217	-0.262	-0.045	-0.231	-0.18	-0.226	-0.228	-0.386	-0.16	-0.181	-0.239	-0.175	-0.299	-0.252	-0.269	-0.204	-0.189	-0.153	-0.213	-0.235	-0.312	1.836	-0.187	-0.218	-0.231	-0.317	-0.226	-0.261	-0.232	-0.211	-0.249	-0.187
alanine-glyoxylate transaminase activity	-0.039	-0.122	-0.23	-0.153	-0.185	-0.032	-0.163	-0.127	-0.16	-0.161	-0.273	-0.113	-0.128	-0.169	-0.124	-0.211	-0.178	-0.19	-0.144	-0.134	-0.108	-0.151	-0.166	4.539	2.937	-0.132	-0.154	-0.163	4.463	-0.16	-0.185	-0.164	-0.149	-0.176	-0.132
alanine-tRNA ligase activity								-0.18	-0.226	-0.228	-0.386	-0.16	-0.181	-0.239	-0.175	-0.299	-0.252	-0.269	-0.204	-0.189	-0.153	-0.213	-0.235	-0.312	-0.482	-0.187	-0.218	-0.231	-0.317	-0.226	-0.261	-0.232	-0.211	-0.249	-0.187
alanyl-tRNA aminoacylation								-0.18	-0.226	-0.228	-0.386	-0.16	-0.181	-0.239	-0.175	-0.299	-0.252	-0.269	-0.204	-0.189	-0.153	-0.213	-0.235	-0.312	-0.482	-0.187	-0.218	-0.231	-0.317	-0.226	-0.261	-0.232	-0.211	-0.249	-0.187
alcohol biosynthesis	-0.179	-0.559	-0.053	-0.704	-0.852	-0.146	-0.75	0.874	1.648	0.385	-0.661	-0.589	-0.656	1.462	0.94	-0.146	1.311	1.107	0.656	-0.682	1.293	-0.785	-0.866	-1.148	2.653	0.799	-0.802	0.362	1.546	-0.831	-0.961	0.393	0.581	1.399	0.839
alcohol catabolism	-0.231	0.691	-0.587	1.358	-0.155	-0.189	0.098	2.58	1.684	0.719	-0.756	3.159	-0.874	2.345	2.711	-1.47	2.966	3.408	1.117	-0.909	2.162	-1.049	-1.157	0.537	2.383	4.735	2.784	0.686	9.314	1.684	1.153	1.665	4.047	5.728	-0.87
alcohol dehydrogenase (NADP+) activity	-0.055	-0.172	-0.325	-0.217	-0.262	-0.045	-0.231	-0.18	-0.226	-0.228	-0.386	-0.16	-0.181	-0.239	-0.175	-0.299	-0.252	-0.269	-0.204	-0.189	-0.153	-0.213	-0.235	3.054	4.154	-0.187	-0.218	4.215	-0.317	-0.226	-0.261	-0.232	4.626	-0.249	-0.187
alcohol dehydrogenase activity	-0.17	-0.532	2.158	-0.669	-0.81	-0.139	-0.713	-0.585	-0.733	0.648	-1.252	-0.519	-0.575	-0.777	-0.568	-0.97	-0.817	-0.874	-0.662	-0.613	-0.495	-0.692	-0.764	4.191	6.319	1.078	-0.707	3.373	1.021	-0.733	-0.847	-0.753	0.809	0.52	-0.606
alcohol dehydrogenase activity\, zinc-dependent	-0.17	-0.532	2.158	-0.669	-0.81	-0.139	-0.713	-0.585	-0.733	0.648	-1.252	-0.519	-0.575	-0.777	-0.568	-0.97	-0.817	-0.874	-0.662	-0.613	-0.495	-0.692	-0.764	4.191	6.319	1.078	-0.707	3.373	1.021	-0.733	-0.847	-0.753	0.809	0.52	-0.606
alcohol metabolism	-0.467	-0.742	0.409	0.469	-0.299	-0.381	-0.873	1.976	1.326	1.264	0.592	1.258	-1.097	2.412	1.506	-1.69	2.531	2.478	0.825	-0.598	1.508	-0.975	-1.278	1.08	3.771	3.594	3.059	7.016	6.389	0.335	0.98	1.212	3.84	3.544	0.061
alcohol O-acetyltransferase activity	-0.055	-0.172	-0.325	-0.217	-0.262	-0.045	-0.231	-0.18	-0.226	-0.228	2.4	-0.16	5.42	-0.239	-0.175	3.198	-0.252	-0.269	-0.204	-0.189	-0.153	-0.213	-0.235	-0.312	-0.482	-0.187	-0.218	4.215	-0.317	-0.226	-0.261	-0.232	-0.211	-0.249	-0.187
alcohol transporter activity	-0.078	-0.244	1.833	-0.306	2.419	-0.064	-0.327	-0.255	-0.319	-0.323	1.424	-0.226	-0.257	-0.339	-0.247	-0.423	-0.356	-0.381	-0.288	-0.267	-0.216	-0.301	-0.333	-0.441	-0.681	-0.264	-0.308	-0.327	-0.448	-0.319	-0.369	-0.328	-0.299	-0.353	-0.264
aldehyde biosynthesis	-0.039	-0.122	4.353	-0.153	-0.185	-0.032	-0.163	-0.127	-0.16	-0.161	-0.273	-0.113	-0.128	-0.169	-0.124	-0.211	-0.178	-0.19	-0.144	-0.134	-0.108	-0.151	-0.166	-0.22	-0.34	-0.132	-0.154	-0.163	-0.224	-0.16	-0.185	-0.164	-0.149	-0.176	-0.132
aldehyde catabolism	-0.039	-0.122	-0.23	-0.153	-0.185	-0.032	-0.163	-0.127	-0.16	-0.161	-0.273	-0.113	-0.128	-0.169	-0.124	-0.211	-0.178	-0.19	-0.144	-0.134	-0.108	-0.151	-0.166	-0.22	-0.34	-0.132	-0.154	-0.163	-0.224	-0.16	-0.185	-0.164	-0.149	-0.176	-0.132
aldehyde dehydrogenase (NAD) activity	-0.067	-0.211	-0.398	-0.265	-0.321	-0.055	-0.283	-0.221	-0.276	-0.28	-0.473	-0.196	-0.222	3.215	-0.214	2.49	3.04	2.812	3.841	4.171	-0.187	-0.261	-0.288	-0.382	1.303	-0.229	-0.267	-0.283	-0.388	-0.277	-0.32	-0.284	-0.259	-0.305	-0.229
aldehyde dehydrogenase [NAD(P)+] activity	-0.055	-0.172	-0.325	-0.217	-0.262	-0.045	-0.231	-0.18	-0.226	-0.228	-0.386	-0.16	-0.181	-0.239	-0.175	-0.299	-0.252	-0.269	-0.204	-0.189	-0.153	-0.213	-0.235	-0.312	1.836	-0.187	-0.218	-0.231	2.998	-0.226	-0.261	-0.232	-0.211	3.887	-0.187
aldehyde dehydrogenase activity	-0.095	-0.298	-0.563	-0.375	-0.455	-0.078	-0.4	-0.312	-0.391	-0.396	-0.668	-0.277	-0.314	2.067	-0.303	1.502	1.933	1.756	2.54	2.786	-0.264	-0.369	-0.408	-0.54	3.182	-0.324	-0.377	-0.4	3.28	-0.391	-0.452	-0.402	-0.366	4.346	-0.324
aldehyde metabolism	-0.146	-0.456	0.366	-0.574	-0.695	-0.119	-0.612	-0.478	1.121	1.096	-1.022	-0.423	-0.481	0.992	-0.463	0.532	2.437	0.743	1.356	1.54	2.106	1.251	1.031	1.722	3.11	1.567	-0.577	2.753	1.669	-0.598	2.308	1.062	1.271	2.47	1.566
aldehyde reductase activity	-0.078	-0.244	-0.46	-0.306	-0.371	-0.064	-0.327	-0.255	2.894	-0.323	-0.546	-0.226	-0.257	-0.339	-0.247	-0.423	2.544	-0.381	-0.288	-0.267	-0.216	-0.301	-0.333	1.94	0.958	-0.264	-0.308	-0.327	4.24	-0.319	-0.369	-0.328	-0.299	2.573	-0.264
aldehyde-lyase activity	-0.055	-0.172	2.916	4.508	-0.262	-0.045	-0.231	-0.255	-0.319	-0.323	-0.546	-0.226	-0.222	-0.339	-0.247	-0.423	-0.356	-0.381	-0.288	-0.267	-0.187	-0.301	-0.333	6.7	2.597	3.589	3.017	-0.327	1.896	2.894	2.433	2.805	3.122	-0.305	-0.229
aldo-keto reductase activity	-0.103	-0.322	-0.608	-0.406	-0.491	-0.084	-0.432	-0.338	2.007	-0.427	-0.722	-0.299	-0.34	-0.448	-0.327	-0.559	1.722	-0.504	-0.381	-0.353	-0.285	-0.399	-0.44	3.016	2.817	-0.35	-0.408	1.945	2.952	-0.423	-0.489	-0.434	2.191	1.745	-0.35
aldose 1-epimerase activity	-0.078	-0.244	-0.46	-0.306	2.419	-0.064	-0.327	3.731	-0.319	2.856	1.424	-0.226	-0.257	-0.339	-0.247	-0.423	2.544	-0.381	-0.288	-0.267	-0.216	-0.301	-0.333	-0.441	0.958	-0.264	-0.308	-0.327	1.896	-0.319	-0.369	-0.328	-0.299	-0.353	-0.264
alkaline phosphatase activity	-0.055	-0.172	-0.325	-0.217	-0.262	-0.045	-0.231	-0.18	-0.226	-0.228	-0.386	-0.16	-0.181	-0.239	-0.175	-0.299	-0.252	-0.269	-0.204	-0.189	-0.153	-0.213	-0.235	-0.312	-0.482	-0.187	-0.218	-0.231	-0.317	-0.226	-0.261	-0.232	-0.211	-0.249	-0.187
alkene biosynthesis	-0.055	-0.172	-0.325	-0.217	3.682	-0.045	-0.231	-0.221	-0.276	-0.28	-0.473	-0.196	-0.222	-0.293	-0.214	-0.366	-0.308	-0.33	-0.25	-0.231	-0.187	-0.261	-0.288	-0.382	-0.59	-0.229	-0.267	-0.283	-0.388	-0.277	-0.32	-0.284	-0.259	-0.305	-0.229
alkene metabolism	-0.055	-0.172	-0.325	-0.217	3.682	-0.045	-0.231	-0.221	-0.276	-0.28	-0.473	-0.196	-0.222	-0.293	-0.214	-0.366	-0.308	-0.33	-0.25	-0.231	-0.187	-0.261	-0.288	-0.382	-0.59	-0.229	-0.267	-0.283	-0.388	-0.277	-0.32	-0.284	-0.259	-0.305	-0.229
alkylbase DNA N-glycosylase activity	-0.055	-0.172	-0.325	-0.217	-0.262	-0.045	-0.231	-0.18	-0.226	-0.228	-0.386	-0.16	-0.181	4.057	-0.175	-0.299	-0.252	3.578	4.806	-0.189	-0.153	-0.213	-0.235	-0.312	-0.482	-0.187	-0.218	-0.231	-0.317	-0.226	-0.261	-0.232	-0.211	-0.249	-0.187
allantoate transport	-0.039	-0.122	-0.23	-0.153	-0.185	-0.032	-0.163	-0.127	-0.16	-0.161	-0.273	-0.113	-0.128	-0.169	-0.124	-0.211	-0.178	-0.19	-0.144	-0.134	-0.108	-0.151	-0.166	-0.22	-0.34	-0.132	-0.154	-0.163	-0.224	-0.16	-0.185	-0.164	-0.149	-0.176	-0.132
allantoate transporter activity	-0.039	-0.122	-0.23	-0.153	-0.185	-0.032	-0.163	-0.127	-0.16	-0.161	-0.273	-0.113	-0.128	-0.169	-0.124	-0.211	-0.178	-0.19	-0.144	-0.134	-0.108	-0.151	-0.166	-0.22	-0.34	-0.132	-0.154	-0.163	-0.224	-0.16	-0.185	-0.164	-0.149	-0.176	-0.132
allantoicase activity	-0.039	-0.122	-0.23	-0.153	-0.185	-0.032	-0.163	-0.127	-0.16	-0.161	-0.273	-0.113	-0.128	-0.169	-0.124	-0.211	-0.178	-0.19	-0.144	-0.134	-0.108	-0.151	-0.166	-0.22	-0.34	-0.132	-0.154	-0.163	-0.224	-0.16	-0.185	-0.164	-0.149	-0.176	-0.132
allantoin catabolism	-0.087	-0.272	-0.514	-0.343	-0.415	-0.071	-0.365	-0.285	-0.357	-0.361	-0.61	-0.253	-0.287	2.339	3.397	-0.473	-0.398	-0.426	-0.322	-0.299	-0.241	-0.337	-0.372	1.636	0.705	-0.295	-0.344	-0.365	3.693	-0.357	-0.413	-0.367	-0.334	4.839	-0.295
allantoin metabolism	-0.087	-0.272	-0.514	-0.343	-0.415	-0.071	-0.365	-0.285	-0.357	-0.361	-0.61	-0.253	-0.287	2.339	3.397	-0.473	-0.398	-0.426	-0.322	-0.299	-0.241	-0.337	-0.372	1.636	0.705	-0.295	-0.344	-0.365	3.693	-0.357	-0.413	-0.367	-0.334	4.839	-0.295
allantoin permease activity	-0.039	-0.122	-0.23	-0.153	-0.185	-0.032	-0.163	-0.127	-0.16	-0.161	-0.273	-0.113	-0.128	-0.169	-0.124	-0.211	-0.178	-0.19	-0.144	-0.134	-0.108	-0.151	-0.166	-0.22	-0.34	-0.132	-0.154	-0.163	-0.224	-0.16	-0.185	-0.164	-0.149	-0.176	-0.132
allantoin transport	-0.039	-0.122	-0.23	-0.153	-0.185	-0.032	-0.163	-0.127	-0.16	-0.161	-0.273	-0.113	-0.128	-0.169	-0.124	-0.211	-0.178	-0.19	-0.144	-0.134	-0.108	-0.151	-0.166	-0.22	-0.34	-0.132	-0.154	-0.163	-0.224	-0.16	-0.185	-0.164	-0.149	-0.176	-0.132
allantoin transporter activity	-0.039	-0.122	-0.23	-0.153	-0.185	-0.032	-0.163	-0.127	-0.16	-0.161	-0.273	-0.113	-0.128	-0.169	-0.124	-0.211	-0.178	-0.19	-0.144	-0.134	-0.108	-0.151	-0.166	-0.22	-0.34	-0.132	-0.154	-0.163	-0.224	-0.16	-0.185	-0.164	-0.149	-0.176	-0.132
allantoinase activity	-0.039	-0.122	-0.23	-0.153	-0.185	-0.032	-0.163	-0.127	-0.16	-0.161	-0.273	-0.113	-0.128	-0.169	-0.124	-0.211	-0.178	-0.19	-0.144	-0.134	-0.108	-0.151	-0.166	-0.22	-0.34	-0.132	-0.154	-0.163	-0.224	-0.16	-0.185	-0.164	-0.149	-0.176	-0.132
allophanate hydrolase activity	-0.039	-0.122	-0.23	-0.153	-0.185	-0.032	-0.163	-0.127	-0.16	-0.161	-0.273	-0.113	-0.128	5.906	8.087	-0.211	-0.178	-0.19	-0.144	-0.134	-0.108	-0.151	-0.166	-0.22	-0.34	-0.132	-0.154	-0.163	4.463	-0.16	-0.185	-0.164	-0.149	5.673	-0.132
alpha DNA polymerase activity								-0.255	-0.319	-0.323	-0.546	-0.226	-0.257	-0.339	-0.247	-0.423	-0.356	-0.381	-0.288	-0.267	-0.216	-0.301	-0.333	-0.441	-0.681	-0.264	-0.308	-0.327	-0.448	-0.319	-0.369	-0.328	-0.299	-0.353	-0.264
alpha DNA polymerase\:primase complex	-0.039	-0.122	-0.23	-0.153	-0.185	-0.032	-0.163	-0.312	-0.391	-0.396	-0.668	-0.277	-0.314	-0.415	-0.303	-0.518	-0.436	-0.467	-0.353	-0.327	-0.264	-0.369	-0.408	-0.54	-0.834	-0.324	-0.377	-0.4	-0.549	-0.391	-0.452	-0.402	-0.366	-0.432	-0.324
alpha\,alpha-trehalase activity	-0.067	-0.211	-0.398	-0.265	-0.321	-0.055	-0.283	-0.221	-0.276	-0.28	-0.473	-0.196	-0.222	-0.293	-0.214	-0.366	-0.308	-0.33	-0.25	-0.231	-0.187	-0.261	-0.288	-0.382	1.303	-0.229	-0.267	-0.283	-0.388	-0.277	-0.32	-0.284	-0.259	-0.305	-0.229
alpha\,alpha-trehalose-phosphate synthase (UDP-forming) activity	-0.067	4.602	-0.398	3.593	-0.321	-0.055	-0.283	-0.221	-0.276	-0.28	-0.473	-0.196	-0.222	-0.293	-0.214	-0.366	-0.308	-0.33	-0.25	-0.231	-0.187	-0.261	-0.288	-0.382	1.303	-0.229	-0.267	-0.283	5.025	-0.277	-0.32	-0.284	-0.259	-0.305	-0.229
alpha\,alpha-trehalose-phosphate synthase complex (UDP-forming)	-0.067	4.602	-0.398	3.593	-0.321	-0.055	-0.283	-0.221	-0.276	-0.28	-0.473	-0.196	-0.222	-0.293	-0.214	-0.366	-0.308	-0.33	-0.25	-0.231	-0.187	-0.261	-0.288	-0.382	1.303	-0.229	-0.267	-0.283	5.025	-0.277	-0.32	-0.284	-0.259	-0.305	-0.229
alpha-1\,2-mannosyltransferase activity	-0.078	-0.244	1.833	-0.306	-0.371	-0.064	-0.327	-0.312	-0.391	-0.396	-0.668	-0.277	-0.314	-0.415	-0.303	-0.518	-0.436	-0.467	-0.353	-0.327	-0.264	-0.369	-0.408	-0.54	-0.834	-0.324	-0.377	-0.4	-0.549	-0.391	-0.452	-0.402	-0.366	-0.432	-0.324
alpha-1\,3-mannosyltransferase activity	-0.087	-0.272	-0.514	-0.343	-0.415	-0.071	-0.365	-0.285	-0.357	-0.361	-0.61	-0.253	-0.287	-0.379	-0.277	-0.473	-0.398	-0.426	-0.322	-0.299	-0.241	-0.337	-0.372	-0.493	-0.762	-0.295	-0.344	-0.365	-0.501	-0.357	-0.413	-0.367	-0.334	-0.394	-0.295
alpha-1\,6-mannosyltransferase activity	-0.11	2.605	7.458	4.295	11.317	22.218	3.989	-0.361	-0.452	-0.457	-0.772	-0.32	-0.363	-0.479	-0.35	-0.598	-0.504	-0.539	-0.408	-0.378	-0.305	-0.427	-0.471	-0.624	-0.964	-0.374	-0.436	-0.462	-0.634	-0.452	-0.522	-0.464	-0.423	-0.499	-0.374
alpha-1\,6-mannosyltransferase complex	-0.095	-0.298	6.925	2.354	10.938	12.798	2.169	-0.312	-0.391	-0.396	-0.668	-0.277	-0.314	-0.415	-0.303	-0.518	-0.436	-0.467	-0.353	-0.327	-0.264	-0.369	-0.408	-0.54	-0.834	-0.324	-0.377	-0.4	-0.549	-0.391	-0.452	-0.402	-0.366	-0.432	-0.324
alpha-amylase activity	-0.087	-0.272	-0.514	-0.343	-0.415	-0.071	-0.365	5.279	4.095	6.288	2.015	9.189	5.242	5.969	8.365	2.901	5.651	5.236	4.605	5.016	6.332	1.974	-0.471	-0.624	2.515	2.352	-0.436	1.762	1.024	1.821	1.46	-0.464	-0.423	-0.499	-0.374
alpha-glucosidase activity	-0.087	-0.272	-0.514	-0.343	-0.415	-0.071	-0.365	5.279	4.095	4.04	2.015	6.019	5.242	3.82	5.46	2.901	3.6	3.311	4.605	5.016	6.332	1.974	-0.471	-0.624	2.515	2.352	-0.436	1.762	1.024	1.821	1.46	-0.464	-0.423	-0.499	-0.374
alpha-glucoside transport	-0.039	-0.122	-0.23	-0.153	-0.185	-0.032	-0.163	5.456	4.318	4.266	-0.386	-0.16	-0.181	-0.239	-0.175	-0.299	3.849	3.578	4.806	-0.189	-0.153	-0.213	-0.235	-0.312	-0.482	-0.187	-0.218	-0.231	-0.317	-0.226	-0.261	-0.232	-0.211	-0.249	-0.187
alpha-glucoside transporter activity	-0.039	-0.122	-0.23	-0.153	-0.185	-0.032	-0.163	5.456	4.318	4.266	-0.386	-0.16	-0.181	-0.239	-0.175	-0.299	3.849	3.578	4.806	-0.189	-0.153	-0.213	-0.235	-0.312	-0.482	-0.187	-0.218	-0.231	-0.317	-0.226	-0.261	-0.232	-0.211	-0.249	-0.187
alpha-glucoside\:hydrogen symporter activity	-0.039	-0.122	-0.23	-0.153	-0.185	-0.032	-0.163	7.843	6.266	6.194	-0.273	-0.113	-0.128	-0.169	-0.124	-0.211	5.621	5.251	6.94	-0.134	-0.108	-0.151	-0.166	-0.22	-0.34	-0.132	-0.154	-0.163	-0.224	-0.16	-0.185	-0.164	-0.149	-0.176	-0.132
alpha-keto amide reductase activity	-0.039	-0.122	-0.23	-0.153	-0.185	-0.032	-0.163	-0.127	-0.16	-0.161	-0.273	-0.113	-0.128	-0.169	-0.124	-0.211	-0.178	-0.19	-0.144	-0.134	-0.108	-0.151	-0.166	4.539	2.937	-0.132	-0.154	-0.163	4.463	-0.16	-0.185	-0.164	6.691	5.673	-0.132
alpha-keto ester reductase activity	-0.039	-0.122	-0.23	-0.153	-0.185	-0.032	-0.163	-0.127	-0.16	-0.161	-0.273	-0.113	-0.128	-0.169	-0.124	-0.211	-0.178	-0.19	-0.144	-0.134	-0.108	-0.151	-0.166	4.539	2.937	-0.132	-0.154	-0.163	4.463	-0.16	-0.185	-0.164	6.691	5.673	-0.132
alpha-mannosidase activity	-0.067	-0.211	-0.398	-0.265	-0.321	-0.055	-0.283	-0.221	-0.276	-0.28	-0.473	-0.196	4.352	-0.293	-0.214	-0.366	-0.308	-0.33	-0.25	-0.231	-0.187	-0.261	-0.288	-0.382	1.303	-0.229	-0.267	3.347	2.319	-0.277	-0.32	3.333	3.691	3.072	-0.229
alpha-tubulin binding	-0.055	-0.172	-0.325	-0.217	-0.262	-0.045	-0.231	-0.18	-0.226	-0.228	-0.386	-0.16	-0.181	-0.239	-0.175	-0.299	-0.252	-0.269	-0.204	-0.189	-0.153	-0.213	-0.235	-0.312	-0.482	-0.187	-0.218	-0.231	-0.317	-0.226	-0.261	-0.232	-0.211	-0.249	-0.187
alpha-tubulin folding	-0.055	-0.172	-0.325	-0.217	-0.262	-0.045	-0.231	-0.18	-0.226	-0.228	-0.386	-0.16	-0.181	-0.239	-0.175	-0.299	-0.252	-0.269	-0.204	-0.189	-0.153	-0.213	-0.235	-0.312	-0.482	-0.187	-0.218	-0.231	-0.317	-0.226	-0.261	-0.232	-0.211	-0.249	-0.187
alpha-type channel activity	-0.141	1.875	0.443	-0.553	-0.67	-0.115	-0.589	-0.478	1.121	-0.605	-1.022	-0.423	-0.481	-0.634	-0.463	-0.791	-0.666	-0.713	1.356	1.54	-0.404	3.067	2.684	4.269	3.11	3.629	2.981	4.435	2.924	2.84	2.308	2.738	3.101	4.035	3.627
amidase activity	-0.067	-0.211	-0.398	-0.265	-0.321	-0.055	-0.283	-0.221	-0.276	-0.28	-0.473	-0.196	-0.222	3.215	4.527	-0.366	-0.308	-0.33	-0.25	-0.231	-0.187	-0.261	-0.288	-0.382	-0.59	-0.229	-0.267	-0.283	2.319	-0.277	-0.32	-0.284	-0.259	3.072	-0.229
amidine-lyase activity	-0.039	-0.122	-0.23	-0.153	-0.185	-0.032	-0.163	-0.18	-0.226	-0.228	2.4	-0.16	-0.181	-0.239	-0.175	-0.299	-0.252	-0.269	-0.204	5.202	-0.153	-0.213	-0.235	-0.312	-0.482	-0.187	-0.218	-0.231	-0.317	-0.226	-0.261	-0.232	-0.211	-0.249	-0.187
amidophosphoribosyltransferase activity	-0.039	-0.122	-0.23	-0.153	-0.185	-0.032	-0.163	-0.127	-0.16	-0.161	-0.273	-0.113	-0.128	-0.169	-0.124	-0.211	-0.178	-0.19	-0.144	-0.134	-0.108	-0.151	-0.166	-0.22	-0.34	-0.132	-0.154	-0.163	-0.224	-0.16	-0.185	-0.164	-0.149	-0.176	-0.132
amine binding	-0.095	-0.298	-0.563	-0.375	-0.455	-0.078	-0.4	-0.383	-0.479	-0.485	-0.819	-0.339	-0.385	-0.508	-0.371	-0.634	-0.534	-0.572	-0.433	-0.401	-0.324	-0.452	-0.499	0.926	3.351	-0.396	-0.462	-0.49	2.455	-0.479	-0.554	-0.492	-0.449	1.422	-0.397
amine biosynthesis	2.049	-0.508	0.609	2.838	0.148	-0.341	0.056	-0.1	0.377	-0.781	-1.475	-1.325	1.268	-0.922	-1.45	0.985	-0.056	0.623	0.79	1.77	0.377	0.015	-1.409	4.912	5.471	1.823	-1.223	2.485	5.165	-1.871	-1.183	3.558	2.438	4.074	4.516
amine catabolism	-0.203	-0.635	-0.313	0.491	-0.967	-0.166	-0.851	0.796	0.335	0.312	2.194	2.726	2.257	0.217	0.861	0.701	-0.961	-0.015	1.86	2.118	2.911	0.45	-0.898	0.583	1.823	0.722	0.406	0.289	4.027	-0.862	0.047	-0.885	-0.807	5.582	0.721
amine metabolism	1.268	-1.198	-0.435	2.044	-0.738	-0.468	-0.156	-0.128	0.159	-1.102	-0.6	0.926	1.341	-0.54	-0.003	0.509	-0.788	-0.106	0.263	2.082	2.326	0.04	-1.616	4.397	4.199	2.153	-0.067	2.804	5.391	-2.267	-0.973	2.378	1.372	6.617	4.088
amine oxidase activity	-0.039	-0.122	-0.23	-0.153	-0.185	-0.032	-0.163	-0.127	-0.16	-0.161	-0.273	-0.113	-0.128	-0.169	-0.124	-0.211	-0.178	-0.19	-0.144	-0.134	-0.108	-0.151	-0.166	-0.22	-0.34	-0.132	-0.154	-0.163	-0.224	-0.16	-0.185	-0.164	-0.149	-0.176	-0.132
amine transport	-0.244	-0.764	-1.442	1.189	-1.164	-0.199	-1.024	-0.887	-1.111	-1.124	-0.756	-0.787	-0.893	-1.178	-0.861	-0.753	-1.238	-1.325	-1.003	-0.929	-0.75	3.871	1.531	6.057	4.759	8.018	5.676	6.155	7.275	4.478	2.778	5.215	4.911	9.797	1.314
amine transporter activity	-0.26	-0.812	-1.532	2.017	-1.237	-0.212	-1.089	-0.829	-1.038	-1.05	-0.554	-0.735	-0.835	-1.102	-0.804	-0.608	-1.157	-1.239	-0.937	-0.869	-0.702	4.276	1.79	5.939	4.893	8.689	6.207	6.728	7.255	3.937	2.271	5.725	5.386	10.632	1.527
amino acid activation	-0.151	-0.472	0.294	1.134	-0.72	-0.123	-0.633	-0.799	0.032	-1.012	-1.077	-0.708	-0.804	-1.061	-0.775	-1.324	-1.115	-1.194	-0.903	-0.837	-0.676	-0.944	-1.042	-1.381	-2.134	-0.828	-0.965	-1.024	-1.404	-1	-1.157	-1.028	-0.937	-1.105	-0.828
amino acid and derivative metabolism	1.37	-1.094	-0.162	2.324	-0.949	-0.447	0.045	-0.472	-0.026	-1.332	-0.748	0.541	1.063	-0.717	-0.363	0.187	-0.945	-0.193	0.017	1.862	1.964	0.259	-1.444	4.586	4.651	2.433	0.152	3.156	5.633	-2.131	-0.747	2.714	1.645	6.764	4.45
amino acid binding	-0.095	-0.298	-0.563	-0.375	-0.455	-0.078	-0.4	-0.383	-0.479	-0.485	-0.819	-0.339	-0.385	-0.508	-0.371	-0.634	-0.534	-0.572	-0.433	-0.401	-0.324	-0.452	-0.499	0.926	3.351	-0.396	-0.462	-0.49	2.455	-0.479	-0.554	-0.492	-0.449	1.422	-0.397
amino acid biosynthesis	2.141	-0.44	0.787	3.034	0.281	-0.33	-0.451	-0.011	0.504	-0.688	-1.323	-1.284	1.399	-0.828	-1.405	1.167	0.07	0.78	0.918	1.92	0.466	0.124	-1.332	4.791	5.588	1.279	-1.749	2.112	5.484	-1.813	-1.086	3.784	2.62	4.326	4.749
amino acid catabolism	-0.191	-0.598	-0.19	0.615	-0.911	-0.156	-0.802	0.959	0.488	0.465	2.581	3.025	2.533	0.369	1.026	0.924	-0.892	0.136	2.118	2.387	3.22	0.605	-0.833	0.804	1.579	0.883	0.561	0.442	3.575	-0.8	0.198	-0.822	-0.749	4.979	0.882
amino acid derivative biosynthesis	-0.151	-0.472	-0.891	-0.594	-0.72	-0.123	2.62	-0.557	-0.697	-0.705	-1.191	-0.494	-0.56	-0.739	-0.54	0.214	-0.777	-0.832	-0.629	-0.583	-0.471	-0.658	-0.726	0.132	-0.733	1.194	0.856	0.732	-0.978	-0.697	-0.806	-0.716	-0.653	-0.77	-0.577
amino acid derivative catabolism	-0.123	-0.385	-0.727	-0.485	-0.587	-0.101	-0.517	1.982	1.409	1.382	1.472	2.329	1.965	1.272	2.067	0.791	-0.591	1.01	1.66	1.857	2.473	-0.5	-0.552	0.705	2.826	-0.438	1.495	-0.542	3.5	-0.53	1.079	-0.544	-0.496	2.945	-0.439
amino acid derivative metabolism	-0.214	-0.669	-1.263	-0.842	-1.02	-0.175	1.408	0.595	0.142	0.119	-0.283	0.848	0.582	1.056	0.658	0.423	-1.056	-0.208	0.346	0.5	0.951	-0.894	-0.987	0.306	1.314	1.829	2.468	2.229	1.055	-0.947	-0.145	-0.973	-0.887	0.937	0.522
amino acid kinase activity	-0.078	-0.244	1.833	3.035	-0.371	-0.064	-0.327	-0.255	-0.319	-0.323	-0.546	-0.226	-0.257	-0.339	-0.247	2.051	-0.356	-0.381	-0.288	-0.267	-0.216	-0.301	-0.333	-0.441	0.958	-0.264	-0.308	-0.327	1.896	-0.319	-0.369	-0.328	-0.299	2.573	-0.264
amino acid metabolism	1.45	-1.016	0.045	2.539	-0.808	-0.432	-0.287	-0.365	0.124	-1.218	-0.512	0.663	1.214	-0.987	-0.257	0.392	-0.804	-0.018	0.154	2.041	2.122	0.408	-1.329	4.604	4.664	1.588	-0.595	2.129	6.005	-2.042	-0.595	2.947	1.833	7.124	4.182
amino acid permease activity	-0.161	-0.503	-0.949	2.615	-0.766	-0.131	-0.674	-0.557	-0.697	-0.705	0.619	-0.494	-0.56	-0.739	-0.54	0.214	-0.777	-0.832	-0.629	-0.583	-0.471	0.902	-0.726	4.506	3.786	6.506	3.911	5.066	6.562	-0.697	-0.806	3.602	2.492	9.984	-0.577
amino acid salvage	-0.055	-0.172	-0.325	-0.217	-0.262	-0.045	-0.231	-0.18	-0.226	-0.228	-0.386	-0.16	-0.181	-0.239	-0.175	-0.299	-0.252	-0.269	-0.204	-0.189	-0.153	-0.213	-0.235	-0.312	-0.482	-0.187	-0.218	-0.231	-0.317	-0.226	-0.261	-0.232	-0.211	-0.249	-0.187
amino acid transport	-0.224	-0.702	-1.325	1.452	-1.07	-0.183	-0.941	-0.809	-1.013	-1.025	-0.481	-0.718	-0.815	-1.075	-0.785	-0.556	-1.129	-1.209	-0.915	-0.848	-0.685	1.197	-0.075	3.888	3.04	6.499	4.298	3.952	6.017	1.026	-0.282	3.929	3.394	7.235	-0.839
amino acid transporter activity	-0.234	-0.734	-1.384	2.432	-1.118	-0.191	-0.984	-0.768	-0.961	-0.972	-0.325	-0.681	-0.772	-1.019	-0.744	-0.445	-1.071	-1.146	-0.867	-0.804	-0.649	1.362	0.032	4.245	3.431	6.936	4.632	4.273	6.489	1.188	-0.174	4.25	3.676	7.742	-0.795
amino acid-polyamine transporter activity	-0.21	-0.658	-1.241	1.662	-1.002	-0.172	-0.882	-0.723	-0.905	-0.916	-0.151	-0.641	-0.728	-0.961	-0.702	-0.322	-1.009	-1.081	-0.817	-0.757	-0.612	1.551	0.152	4.657	3.879	7.447	5.02	4.646	6.208	1.373	-0.053	4.622	4.004	8.333	-0.749
amino sugar biosynthesis	-0.11	-0.345	-0.65	-0.434	1.449	-0.09	-0.462	-0.46	-0.576	-0.583	0.109	-0.408	-0.463	-0.611	-0.446	0.611	-0.642	-0.687	-0.52	-0.482	-0.389	-0.544	-0.6	-0.795	-1.229	-0.477	-0.556	-0.59	-0.809	-0.576	-0.666	-0.592	-0.539	-0.636	-0.477
amino sugar catabolism	-0.087	-0.272	-0.514	-0.343	-0.415	-0.071	-0.365	3.281	2.517	2.482	1.152	3.755	3.257	2.339	3.397	1.74	2.196	2.008	2.847	3.112	3.955	-0.337	-0.372	-0.493	-0.762	-0.295	-0.344	-0.365	-0.501	-0.357	-0.413	-0.367	-0.334	-0.394	-0.295
amino sugar metabolism	-0.141	-0.44	-0.83	-0.553	0.88	-0.115	-0.589	1.34	0.839	0.814	0.701	1.635	1.325	0.715	1.413	1.437	0.613	0.475	1.06	1.232	1.756	-0.64	-0.707	-0.936	-1.447	-0.561	-0.654	-0.694	-0.952	-0.678	-0.784	-0.697	-0.635	-0.749	-0.561
amino-acid N-acetyltransferase activity	-0.078	-0.244	-0.46	-0.306	-0.371	-0.064	-0.327	-0.255	-0.319	-0.323	-0.546	-0.226	-0.257	-0.339	-0.247	-0.423	-0.356	-0.381	3.255	-0.267	-0.216	3.093	2.758	1.94	0.958	3.589	3.017	2.817	1.896	2.894	2.433	2.805	3.122	2.573	3.588
aminoacyl-tRNA hydrolase activity	-0.055	-0.172	-0.325	-0.217	-0.262	-0.045	-0.231	-0.18	-0.226	-0.228	-0.386	-0.16	-0.181	-0.239	-0.175	-0.299	-0.252	-0.269	-0.204	-0.189	-0.153	-0.213	-0.235	-0.312	-0.482	-0.187	-0.218	-0.231	-0.317	-0.226	-0.261	-0.232	-0.211	-0.249	-0.187
aminomethyltransferase activity	-0.055	-0.172	2.916	-0.217	-0.262	-0.045	-0.231	-0.18	-0.226	-0.228	2.4	6.176	-0.181	-0.239	-0.175	-0.299	-0.252	-0.269	-0.204	-0.189	6.481	-0.213	-0.235	3.054	1.836	-0.187	-0.218	-0.231	-0.317	-0.226	-0.261	-0.232	-0.211	3.887	-0.187
aminopeptidase activity	-0.151	-0.472	-0.891	-0.594	-0.72	-0.123	-0.633	-0.494	-0.619	-0.626	-0.039	-0.438	-0.498	-0.657	-0.48	-0.819	-0.69	-0.739	-0.559	-0.518	-0.418	1.17	0.953	1.606	-0.473	1.48	1.122	-0.633	0.343	1.042	0.733	-0.636	2.958	2.341	1.479
aminopeptidase I activity	-0.055	-0.172	-0.325	-0.217	-0.262	-0.045	-0.231	-0.18	-0.226	-0.228	-0.386	-0.16	-0.181	-0.239	-0.175	-0.299	-0.252	-0.269	-0.204	-0.189	-0.153	-0.213	-0.235	3.054	1.836	-0.187	-0.218	-0.231	2.998	-0.226	-0.261	-0.232	4.626	3.887	-0.187
aminophospholipid transporter activity	-0.087	-0.272	-0.514	-0.343	-0.415	-0.071	2.449	-0.312	-0.391	-0.396	-0.668	-0.277	-0.314	-0.415	-0.303	-0.518	-0.436	-0.467	-0.353	-0.327	-0.264	-0.369	-0.408	1.404	0.504	-0.324	-0.377	-0.4	-0.549	-0.391	-0.452	-0.402	-0.366	-0.432	-0.324
ammonia ligase activity								-0.127	6.266	-0.161	-0.273	-0.113	-0.128	-0.169	-0.124	-0.211	-0.178	-0.19	-0.144	7.49	9.273	-0.151	-0.166	-0.22	-0.34	-0.132	-0.154	-0.163	-0.224	-0.16	-0.185	-0.164	-0.149	-0.176	-0.132
ammonia-lyase activity	-0.067	-0.211	-0.398	-0.265	-0.321	-0.055	-0.283	-0.221	-0.276	-0.28	-0.473	-0.196	-0.222	-0.293	-0.214	2.49	-0.308	-0.33	-0.25	-0.231	-0.187	-0.261	-0.288	-0.382	-0.59	-0.229	-0.267	-0.283	-0.388	-0.277	-0.32	-0.284	-0.259	-0.305	-0.229
ammonium transport	-0.067	-0.211	-0.398	-0.265	-0.321	-0.055	-0.283	-0.221	-0.276	-0.28	-0.473	-0.196	-0.222	-0.293	-0.214	-0.366	-0.308	-0.33	-0.25	-0.231	-0.187	-0.261	-0.288	-0.382	5.088	-0.229	-0.267	-0.283	5.025	-0.277	-0.32	-0.284	-0.259	6.45	-0.229
ammonium transporter activity	-0.067	-0.211	-0.398	-0.265	-0.321	-0.055	-0.283	-0.221	-0.276	-0.28	-0.473	-0.196	-0.222	-0.293	-0.214	-0.366	-0.308	-0.33	-0.25	-0.231	-0.187	-0.261	-0.288	-0.382	5.088	-0.229	-0.267	-0.283	5.025	-0.277	-0.32	-0.284	-0.259	6.45	-0.229
AMP binding	-0.039	8.213	4.353	-0.153	-0.185	-0.032	-0.163	-0.127	-0.16	-0.161	-0.273	-0.113	-0.128	-0.169	-0.124	-0.211	-0.178	-0.19	-0.144	-0.134	-0.108	-0.151	-0.166	-0.22	-0.34	-0.132	-0.154	-0.163	-0.224	-0.16	-0.185	-0.164	-0.149	-0.176	-0.132
AMP deaminase activity	-0.039	-0.122	-0.23	-0.153	-0.185	-0.032	-0.163	-0.127	-0.16	-0.161	-0.273	-0.113	-0.128	-0.169	-0.124	-0.211	-0.178	-0.19	-0.144	-0.134	-0.108	-0.151	-0.166	-0.22	-0.34	-0.132	-0.154	-0.163	-0.224	-0.16	-0.185	-0.164	-0.149	-0.176	-0.132
AMP-activated protein kinase activity	-0.078	-0.244	1.833	-0.306	-0.371	-0.064	-0.327	-0.255	-0.319	-0.323	-0.546	-0.226	-0.257	-0.339	-0.247	-0.423	-0.356	-0.381	-0.288	-0.267	-0.216	-0.301	-0.333	-0.441	-0.681	-0.264	-0.308	-0.327	-0.448	-0.319	-0.369	-0.328	-0.299	-0.353	-0.264
amylase activity	-0.087	-0.272	-0.514	-0.343	-0.415	-0.071	-0.365	5.279	4.095	6.288	2.015	9.189	5.242	5.969	8.365	2.901	5.651	5.236	4.605	5.016	6.332	1.974	-0.471	-0.624	2.515	2.352	-0.436	1.762	1.024	1.821	1.46	-0.464	-0.423	-0.499	-0.374
amylo-alpha-1\,6-glucosidase activity	-0.039	-0.122	-0.23	-0.153	-0.185	-0.032	-0.163	-0.127	-0.16	-0.161	-0.273	-0.113	-0.128	5.906	-0.124	-0.211	-0.178	-0.19	-0.144	-0.134	-0.108	-0.151	-0.166	-0.22	2.937	-0.132	-0.154	-0.163	4.463	-0.16	-0.185	-0.164	-0.149	5.673	-0.132
anaerobic respiration	-0.039	-0.122	-0.23	-0.153	-0.185	-0.032	-0.163	-0.221	-0.276	3.39	1.802	4.978	-0.222	3.215	4.527	-0.366	3.04	2.812	-0.25	-0.231	5.23	-0.261	-0.288	-0.382	-0.59	-0.229	-0.267	-0.283	-0.388	-0.277	-0.32	-0.284	-0.259	-0.305	-0.229
anaphase	-0.11	-0.345	-0.65	-0.434	-0.525	-0.09	1.764	2.276	-0.479	-0.485	-0.819	-0.339	-0.385	-0.508	-0.371	-0.634	-0.534	-0.572	-0.433	-0.401	-0.324	-0.452	-0.499	0.926	1.165	-0.396	-0.462	-0.49	-0.673	-0.479	-0.554	-0.492	-0.449	-0.529	-0.397
anaphase-promoting complex	-0.095	-0.298	-0.563	-0.375	-0.455	-0.078	-0.4	-0.494	-0.619	-0.626	-1.058	-0.438	-0.498	-0.657	-0.48	-0.819	-0.69	-0.739	-0.559	-0.518	-0.418	-0.584	-0.645	-0.854	-1.32	-0.512	-0.597	-0.633	-0.869	-0.619	-0.716	-0.636	-0.58	-0.684	-0.512
anchored to membrane	-0.055	-0.172	-0.325	-0.217	-0.262	-0.045	-0.231	-0.18	-0.226	-0.228	-0.386	-0.16	5.42	-0.239	-0.175	-0.299	-0.252	-0.269	-0.204	-0.189	-0.153	-0.213	-0.235	-0.312	-0.482	-0.187	-0.218	-0.231	-0.317	-0.226	-0.261	-0.232	-0.211	-0.249	-0.187
anchored to plasma membrane	-0.055	-0.172	-0.325	-0.217	-0.262	-0.045	-0.231	-0.18	-0.226	-0.228	-0.386	-0.16	5.42	-0.239	-0.175	-0.299	-0.252	-0.269	-0.204	-0.189	-0.153	-0.213	-0.235	-0.312	-0.482	-0.187	-0.218	-0.231	-0.317	-0.226	-0.261	-0.232	-0.211	-0.249	-0.187
anion channel activity	-0.078	3.925	1.833	-0.306	-0.371	-0.064	-0.327	-0.285	-0.357	-0.361	-0.61	-0.253	-0.287	-0.379	-0.277	-0.473	-0.398	-0.426	-0.322	-0.299	-0.241	-0.337	-0.372	1.636	0.705	-0.295	-0.344	-0.365	-0.501	-0.357	-0.413	-0.367	-0.334	-0.394	-0.295
anion exchanger activity	-0.039	-0.122	-0.23	-0.153	-0.185	-0.032	-0.163	-0.127	-0.16	-0.161	-0.273	-0.113	-0.128	-0.169	-0.124	-0.211	-0.178	-0.19	-0.144	-0.134	-0.108	-0.151	-0.166	-0.22	-0.34	-0.132	-0.154	-0.163	-0.224	-0.16	-0.185	-0.164	-0.149	-0.176	-0.132
anion transport	-0.174	3.19	-0.003	-0.687	-0.831	-0.142	-0.732	1.053	0.576	-0.776	-0.488	-0.543	1.038	-0.814	-0.594	0.018	-0.855	0.222	-0.692	2.544	-0.518	-0.724	-0.799	2.919	2.473	-0.635	-0.74	0.529	3.82	-0.767	-0.887	1.829	2.141	4.041	2.584
anion transporter activity	-0.183	1.209	-1.08	-0.72	-0.872	-0.149	0.577	1.157	0.672	-0.741	-0.391	-0.519	1.143	-0.777	-0.568	0.111	-0.817	0.315	-0.662	2.72	-0.495	-0.692	-0.764	4.191	2.736	-0.606	-0.707	0.625	4.095	-0.733	-0.847	1.986	2.305	4.306	2.761
anion\:anion antiporter activity	-0.039	-0.122	-0.23	-0.153	-0.185	-0.032	-0.163	-0.127	-0.16	-0.161	-0.273	-0.113	-0.128	-0.169	-0.124	-0.211	-0.178	-0.19	-0.144	-0.134	-0.108	-0.151	-0.166	-0.22	-0.34	-0.132	-0.154	-0.163	-0.224	-0.16	-0.185	-0.164	-0.149	-0.176	-0.132
anion\:cation symporter activity	-0.039	-0.122	-0.23	-0.153	-0.185	-0.032	-0.163	7.843	6.266	-0.161	-0.273	-0.113	7.793	-0.169	-0.124	4.734	-0.178	-0.19	-0.144	-0.134	-0.108	-0.151	-0.166	-0.22	-0.34	-0.132	-0.154	-0.163	-0.224	-0.16	-0.185	6.099	6.691	-0.176	-0.132
anthranilate phosphoribosyltransferase activity	-0.039	-0.122	-0.23	-0.153	-0.185	-0.032	-0.163	-0.127	-0.16	-0.161	-0.273	-0.113	-0.128	-0.169	-0.124	-0.211	-0.178	-0.19	-0.144	-0.134	-0.108	-0.151	-0.166	-0.22	-0.34	-0.132	-0.154	-0.163	-0.224	-0.16	-0.185	-0.164	-0.149	-0.176	-0.132
anthranilate synthase activity	-0.078	-0.244	-0.46	-0.306	-0.371	-0.064	-0.327	-0.285	-0.357	-0.361	-0.61	-0.253	-0.287	-0.379	-0.277	-0.473	-0.398	-0.426	-0.322	-0.299	-0.241	-0.337	-0.372	-0.493	0.705	-0.295	-0.344	-0.365	-0.501	-0.357	-0.413	-0.367	-0.334	-0.394	-0.295
anti-apoptosis	-0.039	-0.122	-0.23	-0.153	-0.185	-0.032	-0.163	-0.18	-0.226	-0.228	-0.386	-0.16	-0.181	-0.239	-0.175	-0.299	-0.252	-0.269	-0.204	-0.189	-0.153	-0.213	-0.235	-0.312	-0.482	-0.187	-0.218	-0.231	-0.317	-0.226	-0.261	-0.232	-0.211	-0.249	-0.187
antibiotic biosynthesis	-0.039	-0.122	-0.23	-0.153	-0.185	-0.032	-0.163	-0.127	-0.16	-0.161	3.666	-0.113	-0.128	-0.169	-0.124	-0.211	-0.178	-0.19	-0.144	-0.134	-0.108	-0.151	-0.166	-0.22	-0.34	-0.132	-0.154	-0.163	-0.224	-0.16	-0.185	-0.164	-0.149	-0.176	-0.132
antibiotic metabolism	-0.039	-0.122	-0.23	-0.153	-0.185	-0.032	-0.163	-0.127	-0.16	-0.161	3.666	-0.113	-0.128	-0.169	-0.124	-0.211	-0.178	-0.19	-0.144	-0.134	-0.108	-0.151	-0.166	-0.22	-0.34	-0.132	-0.154	-0.163	-0.224	-0.16	-0.185	-0.164	-0.149	-0.176	-0.132
antioxidant activity	-0.161	-0.503	-0.949	0.991	-0.766	-0.131	-0.674	-0.542	0.839	0.814	-1.159	1.635	-0.545	2.149	3.351	-0.898	3.351	0.475	1.06	1.232	-0.458	-0.64	-0.707	2.434	3.97	-0.561	0.915	2.274	3.474	-0.678	0.539	-0.697	0.98	3.394	1.257
antiporter activity	-0.129	-0.404	-0.763	-0.509	1.068	-0.105	-0.542	-0.442	-0.553	-0.56	-0.946	-0.392	-0.445	-0.587	-0.429	-0.733	-0.617	-0.66	-0.5	-0.463	-0.374	-0.523	-0.577	-0.764	0.714	-0.458	-0.534	-0.566	-0.777	-0.554	-0.64	-0.569	-0.518	-0.611	-0.458
AP-1 adaptor complex	-0.087	-0.272	-0.514	-0.343	-0.415	-0.071	-0.365	-0.285	-0.357	-0.361	-0.61	-0.253	-0.287	-0.379	-0.277	-0.473	-0.398	-0.426	-0.322	-0.299	-0.241	-0.337	-0.372	-0.493	-0.762	-0.295	-0.344	-0.365	-0.501	-0.357	-0.413	-0.367	-0.334	-0.394	-0.295
apoptosis	-0.103	-0.322	1.125	-0.406	-0.491	-0.084	-0.432	-0.423	1.409	-0.536	0.283	-0.375	-0.426	1.272	-0.411	-0.701	1.159	1.01	-0.478	-0.443	-0.358	-0.5	-0.552	-0.731	-0.141	-0.438	-0.511	-0.542	-0.744	-0.53	-0.613	-0.544	-0.496	-0.585	-0.439
apyrase activity	-0.039	-0.122	-0.23	-0.153	-0.185	-0.032	-0.163	-0.127	-0.16	-0.161	-0.273	-0.113	-0.128	-0.169	-0.124	-0.211	-0.178	-0.19	-0.144	-0.134	-0.108	-0.151	-0.166	-0.22	-0.34	-0.132	-0.154	-0.163	-0.224	-0.16	-0.185	-0.164	-0.149	-0.176	-0.132
arabinose metabolism	-0.078	-0.244	-0.46	-0.306	-0.371	-0.064	-0.327	-0.255	-0.319	-0.323	-0.546	-0.226	-0.257	-0.339	-0.247	-0.423	-0.356	-0.381	-0.288	-0.267	-0.216	-0.301	-0.333	1.94	0.958	-0.264	-0.308	-0.327	4.24	-0.319	-0.369	-0.328	-0.299	2.573	-0.264
aralkylamine N-acetyltransferase activity	-0.039	-0.122	-0.23	-0.153	-0.185	-0.032	-0.163	-0.127	-0.16	-0.161	3.666	-0.113	-0.128	-0.169	-0.124	-0.211	-0.178	-0.19	-0.144	-0.134	-0.108	-0.151	-0.166	-0.22	-0.34	-0.132	-0.154	-0.163	-0.224	-0.16	-0.185	-0.164	-0.149	-0.176	-0.132
ARF GTPase activator activity	-0.078	-0.244	1.833	-0.306	-0.371	-0.064	-0.327	-0.255	-0.319	-0.323	-0.546	-0.226	-0.257	-0.339	-0.247	-0.423	-0.356	-0.381	-0.288	-0.267	-0.216	-0.301	-0.333	-0.441	-0.681	-0.264	-0.308	-0.327	-0.448	-0.319	-0.369	-0.328	-0.299	-0.353	-0.264
ARF guanyl-nucleotide exchange factor activity	-0.067	-0.211	-0.398	-0.265	-0.321	-0.055	-0.283	-0.285	-0.357	-0.361	1.152	-0.253	-0.287	-0.379	-0.277	-0.473	-0.398	-0.426	-0.322	-0.299	-0.241	-0.337	-0.372	-0.493	-0.762	-0.295	-0.344	-0.365	-0.501	-0.357	-0.413	-0.367	-0.334	-0.394	-0.295
arginase activity	-0.039	-0.122	-0.23	-0.153	-0.185	-0.032	-0.163	-0.127	-0.16	-0.161	-0.273	-0.113	-0.128	-0.169	-0.124	-0.211	-0.178	-0.19	-0.144	-0.134	-0.108	-0.151	-0.166	-0.22	-0.34	-0.132	-0.154	-0.163	-0.224	-0.16	-0.185	-0.164	-0.149	-0.176	-0.132
arginine biosynthesis	-0.123	-0.385	-0.727	-0.485	-0.587	-0.101	-0.517	-0.423	-0.53	1.382	-0.906	-0.375	1.965	-0.562	-0.411	2.284	-0.591	-0.632	3.798	1.857	2.473	-0.5	-0.552	-0.731	2.826	-0.438	-0.511	5.15	-0.744	-0.53	-0.613	-0.544	-0.496	-0.585	-0.439
arginine catabolism	-0.039	-0.122	-0.23	-0.153	-0.185	-0.032	-0.163	-0.18	-0.226	-0.228	-0.386	-0.16	-0.181	-0.239	-0.175	-0.299	-0.252	-0.269	-0.204	-0.189	-0.153	4.586	-0.235	-0.312	-0.482	5.262	-0.218	4.215	2.998	-0.226	-0.261	-0.232	-0.211	3.887	5.26
arginine catabolism to ornithine	-0.055	-0.172	-0.325	-0.217	-0.262	-0.045	-0.231	-0.127	-0.16	-0.161	-0.273	-0.113	-0.128	-0.169	-0.124	-0.211	-0.178	-0.19	-0.144	-0.134	-0.108	-0.151	-0.166	-0.22	-0.34	-0.132	-0.154	-0.163	-0.224	-0.16	-0.185	-0.164	-0.149	-0.176	-0.132
arginine metabolism	-0.156	-0.488	-0.921	-0.614	-0.743	-0.127	-0.654	-0.526	-0.659	0.877	-1.126	-0.467	1.394	0.777	1.484	1.53	-0.735	-0.786	2.847	1.3	1.833	1.026	-0.687	-0.91	1.779	1.326	-0.636	5.434	1.352	-0.659	-0.762	-0.677	-0.617	2.114	1.325
arginine N-methyltransferase activity	-0.067	-0.211	-0.398	-0.265	-0.321	-0.055	-0.283	-0.221	-0.276	-0.28	-0.473	-0.196	-0.222	-0.293	-0.214	-0.366	-0.308	-0.33	-0.25	-0.231	-0.187	-0.261	-0.288	-0.382	-0.59	-0.229	-0.267	-0.283	-0.388	-0.277	-0.32	-0.284	-0.259	-0.305	-0.229
arginine permease activity	-0.039	-0.122	-0.23	-0.153	-0.185	-0.032	-0.163	-0.127	-0.16	-0.161	-0.273	-0.113	-0.128	-0.169	-0.124	-0.211	-0.178	-0.19	-0.144	-0.134	-0.108	-0.151	-0.166	-0.22	-0.34	-0.132	-0.154	-0.163	-0.224	-0.16	-0.185	-0.164	-0.149	-0.176	-0.132
arginine-tRNA ligase activity	-0.039	-0.122	-0.23	-0.153	-0.185	-0.032	-0.163	-0.18	4.318	-0.228	-0.386	-0.16	-0.181	-0.239	-0.175	-0.299	-0.252	-0.269	-0.204	-0.189	-0.153	-0.213	-0.235	-0.312	-0.482	-0.187	-0.218	-0.231	-0.317	-0.226	-0.261	-0.232	-0.211	-0.249	-0.187
argininosuccinate lyase activity	-0.039	-0.122	-0.23	-0.153	-0.185	-0.032	-0.163	-0.127	-0.16	-0.161	-0.273	-0.113	-0.128	-0.169	-0.124	-0.211	-0.178	-0.19	-0.144	-0.134	-0.108	-0.151	-0.166	-0.22	-0.34	-0.132	-0.154	-0.163	-0.224	-0.16	-0.185	-0.164	-0.149	-0.176	-0.132
argininosuccinate metabolism	-0.039	-0.122	-0.23	-0.153	-0.185	-0.032	-0.163	-0.127	-0.16	6.194	-0.273	-0.113	7.793	-0.169	-0.124	4.734	-0.178	-0.19	6.94	7.49	9.273	-0.151	-0.166	-0.22	-0.34	-0.132	-0.154	6.123	-0.224	-0.16	-0.185	-0.164	-0.149	-0.176	-0.132
argininosuccinate synthase activity	-0.039	-0.122	-0.23	-0.153	-0.185	-0.032	-0.163	-0.127	-0.16	6.194	-0.273	-0.113	7.793	-0.169	-0.124	4.734	-0.178	-0.19	6.94	7.49	9.273	-0.151	-0.166	-0.22	-0.34	-0.132	-0.154	6.123	-0.224	-0.16	-0.185	-0.164	-0.149	-0.176	-0.132
arginyltransferase activity	-0.039	-0.122	-0.23	-0.153	-0.185	-0.032	-0.163	-0.127	-0.16	-0.161	-0.273	-0.113	-0.128	-0.169	-0.124	-0.211	-0.178	-0.19	-0.144	-0.134	-0.108	-0.151	-0.166	-0.22	-0.34	-0.132	-0.154	-0.163	-0.224	-0.16	-0.185	-0.164	-0.149	-0.176	-0.132
arginyl-tRNA aminoacylation	-0.039	-0.122	-0.23	-0.153	-0.185	-0.032	-0.163	-0.18	4.318	-0.228	-0.386	-0.16	-0.181	-0.239	-0.175	-0.299	-0.252	-0.269	-0.204	-0.189	-0.153	-0.213	-0.235	-0.312	-0.482	-0.187	-0.218	-0.231	-0.317	-0.226	-0.261	-0.232	-0.211	-0.249	-0.187
aromatic amino acid family biosynthesis	-0.11	-0.345	-0.65	-0.434	-0.525	-0.09	1.764	-0.526	-0.659	-0.667	-0.17	-0.467	-0.53	-0.699	-0.511	1.53	-0.735	-0.786	-0.595	-0.551	-0.445	-0.622	-0.687	-0.91	-1.406	-0.545	-0.636	-0.674	-0.925	-0.659	-0.762	-0.677	-0.617	-0.728	-0.545
aromatic amino acid family biosynthesis\, anthranilate pathway	-0.039	-0.122	-0.23	-0.153	-0.185	-0.032	-0.163	-0.404	-0.505	-0.511	-0.863	-0.358	-0.406	-0.536	-0.391	0.897	-0.563	-0.603	-0.456	-0.423	-0.341	-0.477	-0.526	-0.697	-1.078	-0.418	-0.487	-0.517	-0.709	-0.505	-0.584	-0.519	-0.473	-0.558	-0.418
aromatic amino acid family biosynthesis\, prephenate pathway	-0.039	-0.122	-0.23	-0.153	-0.185	-0.032	-0.163	-0.18	-0.226	-0.228	-0.386	-0.16	-0.181	-0.239	-0.175	-0.299	-0.252	-0.269	-0.204	-0.189	-0.153	-0.213	-0.235	-0.312	-0.482	-0.187	-0.218	-0.231	-0.317	-0.226	-0.261	-0.232	-0.211	-0.249	-0.187
aromatic amino acid family biosynthesis\, shikimate pathway	6.745	-0.456	-0.861	1.214	-0.695	-0.119	1.072	-0.18	-0.226	-0.228	-0.386	-0.16	-0.181	-0.239	-0.175	-0.299	-0.252	-0.269	-0.204	-0.189	-0.153	-0.213	-0.235	-0.312	-0.482	-0.187	-0.218	-0.231	-0.317	-0.226	-0.261	-0.232	-0.211	-0.249	-0.187
aromatic amino acid family catabolism	-0.095	-0.298	-0.563	-0.375	-0.455	-0.078	-0.4	2.943	2.233	2.2	2.549	3.382	2.921	2.067	3.051	1.502	-0.436	1.756	2.54	2.786	3.567	-0.369	-0.408	1.404	3.182	-0.324	2.338	-0.4	3.28	-0.391	1.836	-0.402	-0.366	1.957	-0.324
aromatic amino acid family metabolism	5.319	-0.573	-1.08	0.708	-0.872	-0.149	0.577	0.959	0.488	0.465	1.791	1.229	2.533	0.369	2.672	2.906	-0.892	0.136	0.698	2.387	1.34	-0.755	-0.833	-0.15	0.265	-0.662	0.561	-0.818	0.756	-0.8	0.198	-0.822	-0.749	0.289	-0.662
aromatic amino acid transport	-0.039	-0.122	-0.23	-0.153	-0.185	-0.032	-0.163	-0.127	-0.16	-0.161	3.666	-0.113	-0.128	-0.169	-0.124	-0.211	-0.178	-0.19	-0.144	-0.134	-0.108	-0.151	-0.166	-0.22	-0.34	-0.132	-0.154	-0.163	-0.224	-0.16	-0.185	-0.164	-0.149	-0.176	-0.132
aromatic amino acid transporter activity	-0.039	-0.122	-0.23	-0.153	-0.185	-0.032	-0.163	-0.127	-0.16	-0.161	3.666	-0.113	-0.128	-0.169	-0.124	-0.211	-0.178	-0.19	-0.144	-0.134	-0.108	-0.151	-0.166	-0.22	-0.34	-0.132	-0.154	-0.163	-0.224	-0.16	-0.185	-0.164	-0.149	-0.176	-0.132
aromatic compound biosynthesis	6.291	-0.488	-0.921	1.06	-0.743	-0.127	0.921	-0.571	-0.715	-0.723	0.543	-0.506	-0.575	-0.759	-0.554	1.269	-0.797	-0.853	-0.646	-0.598	-0.483	-0.675	-0.745	-0.987	-1.525	-0.592	-0.69	-0.732	-1.004	-0.715	-0.827	-0.735	-0.67	-0.79	-0.592
aromatic compound catabolism	-0.103	-0.322	-0.608	-0.406	-0.491	-0.084	-0.432	2.677	2.007	1.976	2.257	3.089	2.656	1.849	2.778	1.311	-0.471	1.554	2.298	2.53	3.262	-0.399	-0.44	1.217	2.817	-0.35	2.107	-0.432	2.952	-0.423	1.631	-0.434	-0.396	1.745	-0.35
aromatic compound metabolism	2.957	-0.974	-0.674	0.471	-1.484	-0.254	-0.507	-0.185	-0.645	-0.669	2.659	0.056	1.644	-0.77	0.831	1.033	-1.552	-1.028	-0.433	1.495	0.15	-1.314	-1.45	0.292	0.461	-1.152	0.203	0.038	1.316	-1.392	-0.306	-1.43	0.288	1.183	-1.152
aromatic-amino-acid transaminase activity	-0.055	-0.172	-0.325	-0.217	-0.262	-0.045	-0.231	-0.18	-0.226	-0.228	2.4	-0.16	5.42	-0.239	5.631	3.198	-0.252	-0.269	-0.204	5.202	-0.153	-0.213	-0.235	-0.312	-0.482	-0.187	-0.218	-0.231	-0.317	-0.226	-0.261	-0.232	-0.211	-0.249	-0.187
Arp2/3 protein complex	-0.039	-0.122	-0.23	6.528	5.392	-0.032	-0.163	-0.338	-0.423	-0.427	-0.722	-0.299	-0.34	-0.448	-0.327	-0.559	-0.471	-0.504	-0.381	-0.353	-0.285	-0.399	-0.44	-0.583	-0.901	-0.35	-0.408	-0.432	-0.593	-0.423	-0.489	-0.434	-0.396	-0.467	-0.35
arsenate reductase activity	-0.039	-0.122	-0.23	-0.153	-0.185	-0.032	-0.163	-0.127	-0.16	-0.161	-0.273	-0.113	-0.128	-0.169	-0.124	-0.211	-0.178	-0.19	-0.144	-0.134	-0.108	-0.151	-0.166	4.539	2.937	-0.132	-0.154	-0.163	-0.224	-0.16	-0.185	-0.164	-0.149	-0.176	-0.132
arsenite porter activity	-0.039	-0.122	-0.23	-0.153	-0.185	-0.032	-0.163	-0.127	-0.16	-0.161	-0.273	-0.113	-0.128	-0.169	-0.124	-0.211	-0.178	-0.19	-0.144	-0.134	-0.108	-0.151	-0.166	-0.22	-0.34	-0.132	-0.154	-0.163	-0.224	-0.16	-0.185	-0.164	-0.149	-0.176	-0.132
arsenite transport	-0.055	5.722	-0.325	-0.217	-0.262	-0.045	-0.231	-0.127	-0.16	-0.161	-0.273	-0.113	-0.128	-0.169	-0.124	-0.211	-0.178	-0.19	-0.144	7.49	-0.108	-0.151	-0.166	4.539	2.937	-0.132	-0.154	-0.163	-0.224	-0.16	-0.185	-0.164	-0.149	-0.176	-0.132
arsenite transporter activity	-0.039	8.213	-0.23	-0.153	-0.185	-0.032	-0.163	-0.18	-0.226	-0.228	-0.386	-0.16	-0.181	-0.239	-0.175	-0.299	-0.252	-0.269	-0.204	5.202	-0.153	-0.213	-0.235	3.054	1.836	-0.187	-0.218	-0.231	-0.317	-0.226	-0.261	-0.232	-0.211	-0.249	-0.187
arsenite-transporting ATPase activity	-0.039	-0.122	-0.23	-0.153	-0.185	-0.032	-0.163	-0.127	-0.16	-0.161	-0.273	-0.113	-0.128	-0.169	-0.124	-0.211	-0.178	-0.19	-0.144	-0.134	-0.108	-0.151	-0.166	-0.22	-0.34	-0.132	-0.154	-0.163	-0.224	-0.16	-0.185	-0.164	-0.149	-0.176	-0.132
arylformamidase activity	-0.039	-0.122	-0.23	-0.153	-0.185	-0.032	-0.163	-0.127	-0.16	-0.161	-0.273	-0.113	-0.128	-0.169	-0.124	-0.211	-0.178	-0.19	-0.144	-0.134	-0.108	-0.151	-0.166	4.539	2.937	-0.132	-0.154	-0.163	4.463	-0.16	-0.185	-0.164	-0.149	5.673	-0.132
asexual reproduction	-0.268	1.606	2.45	5.805	6.086	-0.219	1.643	-1.119	-1.401	-1.418	-1.485	-0.993	-1.127	-1.487	-1.086	-1.283	-1.562	-1.672	-1.265	-1.172	-0.947	0.245	-0.032	-0.835	-1.475	-1.159	-0.584	-1.434	-1.426	0.825	-0.326	0.008	0.268	-1.548	-0.27
asparaginase activity	-0.055	-0.172	-0.325	-0.217	-0.262	-0.045	-0.231	-0.312	-0.391	-0.396	-0.668	-0.277	-0.314	-0.415	-0.303	-0.518	-0.436	-0.467	-0.353	-0.327	-0.264	-0.369	-0.408	-0.54	-0.834	-0.324	-0.377	-0.4	-0.549	-0.391	-0.452	-0.402	-0.366	-0.432	-0.324
asparagine biosynthesis	-0.067	-0.211	-0.398	3.593	-0.321	-0.055	-0.283	-0.221	-0.276	-0.28	-0.473	-0.196	-0.222	-0.293	-0.214	-0.366	-0.308	-0.33	-0.25	-0.231	-0.187	-0.261	-0.288	-0.382	1.303	-0.229	-0.267	-0.283	-0.388	-0.277	-0.32	-0.284	-0.259	-0.305	-0.229
asparagine catabolism	-0.039	-0.122	-0.23	-0.153	-0.185	-0.032	-0.163	-0.127	-0.16	-0.161	-0.273	-0.113	-0.128	-0.169	-0.124	-0.211	-0.178	-0.19	-0.144	-0.134	-0.108	-0.151	-0.166	-0.22	-0.34	-0.132	-0.154	-0.163	-0.224	-0.16	-0.185	-0.164	-0.149	-0.176	-0.132
asparagine metabolism	-0.078	-0.244	-0.46	3.035	-0.371	-0.064	-0.327	-0.361	-0.452	-0.457	-0.772	-0.32	-0.363	-0.479	-0.35	-0.598	-0.504	-0.539	-0.408	-0.378	-0.305	-0.427	-0.471	-0.624	0.196	-0.374	-0.436	-0.462	-0.634	-0.452	-0.522	-0.464	-0.423	-0.499	-0.374
asparagine synthase (glutamine-hydrolyzing) activity	-0.067	-0.211	-0.398	3.593	-0.321	-0.055	-0.283	-0.221	-0.276	-0.28	-0.473	-0.196	-0.222	-0.293	-0.214	-0.366	-0.308	-0.33	-0.25	-0.231	-0.187	-0.261	-0.288	-0.382	1.303	-0.229	-0.267	-0.283	-0.388	-0.277	-0.32	-0.284	-0.259	-0.305	-0.229
asparagine-tRNA ligase activity	-0.039	-0.122	-0.23	-0.153	-0.185	-0.032	-0.163	-0.18	-0.226	-0.228	-0.386	-0.16	-0.181	-0.239	-0.175	-0.299	-0.252	-0.269	-0.204	-0.189	-0.153	-0.213	-0.235	-0.312	-0.482	-0.187	-0.218	-0.231	-0.317	-0.226	-0.261	-0.232	-0.211	-0.249	-0.187
asparaginyl-tRNA aminoacylation	-0.039	-0.122	-0.23	-0.153	-0.185	-0.032	-0.163	-0.18	-0.226	-0.228	-0.386	-0.16	-0.181	-0.239	-0.175	-0.299	-0.252	-0.269	-0.204	-0.189	-0.153	-0.213	-0.235	-0.312	-0.482	-0.187	-0.218	-0.231	-0.317	-0.226	-0.261	-0.232	-0.211	-0.249	-0.187
aspartate carbamoyltransferase activity	-0.039	-0.122	-0.23	-0.153	-0.185	-0.032	-0.163	-0.127	-0.16	-0.161	-0.273	-0.113	-0.128	-0.169	-0.124	-0.211	-0.178	-0.19	-0.144	-0.134	-0.108	-0.151	-0.166	-0.22	2.937	-0.132	-0.154	-0.163	-0.224	-0.16	-0.185	-0.164	-0.149	-0.176	-0.132
aspartate family amino acid biosynthesis	-0.224	-0.702	-0.524	1.452	-0.095	-0.183	0.158	-0.799	-1	-1.012	-0.444	-0.708	1.742	-1.061	-0.775	0.265	-1.115	-1.194	-0.903	-0.837	-0.676	1.237	-1.042	7.032	5.24	2.887	-0.965	-0.013	7.635	-1	-1.157	7.025	5.66	6.415	6.599
aspartate family amino acid catabolism	-0.078	-0.244	1.833	3.035	-0.371	-0.064	-0.327	-0.255	-0.319	-0.323	-0.546	-0.226	-0.257	-0.339	-0.247	2.051	-0.356	-0.381	-0.288	-0.267	-0.216	-0.301	-0.333	1.94	-0.681	-0.264	-0.308	-0.327	-0.448	-0.319	-0.369	-0.328	-0.299	-0.353	-0.264
aspartate family amino acid metabolism	-0.26	-0.812	-0.143	3.029	-0.391	-0.212	-0.135	-0.95	-1.19	-1.203	-0.966	-0.843	1.191	-1.262	-0.922	0.436	-1.326	-1.42	-1.074	-0.995	-0.804	0.716	-1.24	7.388	4.125	2.149	-1.148	-0.365	5.953	-1.19	-1.376	5.569	4.449	5.821	5.279
aspartate kinase activity	-0.039	-0.122	-0.23	-0.153	-0.185	-0.032	-0.163	-0.127	-0.16	-0.161	-0.273	-0.113	-0.128	-0.169	-0.124	-0.211	-0.178	-0.19	-0.144	-0.134	-0.108	-0.151	-0.166	-0.22	-0.34	-0.132	-0.154	-0.163	-0.224	-0.16	-0.185	-0.164	-0.149	-0.176	-0.132
aspartate transaminase activity	-0.055	-0.172	2.916	-0.217	-0.262	-0.045	-0.231	-0.18	-0.226	-0.228	-0.386	-0.16	-0.181	-0.239	-0.175	-0.299	-0.252	-0.269	-0.204	-0.189	-0.153	-0.213	-0.235	-0.312	-0.482	-0.187	4.484	-0.231	-0.317	-0.226	3.702	-0.232	-0.211	-0.249	-0.187
aspartate-semialdehyde dehydrogenase activity	-0.039	-0.122	-0.23	-0.153	-0.185	-0.032	-0.163	-0.127	-0.16	-0.161	-0.273	-0.113	-0.128	-0.169	-0.124	-0.211	-0.178	-0.19	-0.144	-0.134	-0.108	-0.151	-0.166	-0.22	-0.34	-0.132	-0.154	-0.163	-0.224	-0.16	-0.185	-0.164	-0.149	-0.176	-0.132
aspartate-tRNA ligase activity	-0.055	-0.172	-0.325	4.508	-0.262	-0.045	-0.231	-0.255	-0.319	-0.323	-0.546	-0.226	-0.257	-0.339	-0.247	-0.423	-0.356	-0.381	-0.288	-0.267	-0.216	-0.301	-0.333	-0.441	-0.681	-0.264	-0.308	-0.327	-0.448	-0.319	-0.369	-0.328	-0.299	-0.353	-0.264
aspartic-type endopeptidase activity	-0.11	-0.345	-0.65	-0.434	1.449	-0.09	1.764	-0.361	-0.452	-0.457	-0.772	-0.32	-0.363	-0.479	-0.35	-0.598	-0.504	-0.539	2.099	-0.378	-0.305	-0.427	-0.471	1.06	0.196	-0.374	-0.436	1.762	-0.634	1.821	1.46	1.752	1.997	-0.499	-0.374
aspartic-type endopeptidase inhibitor activity	-0.039	-0.122	-0.23	-0.153	-0.185	-0.032	-0.163	-0.127	-0.16	-0.161	-0.273	-0.113	-0.128	5.906	-0.124	-0.211	-0.178	-0.19	-0.144	-0.134	-0.108	-0.151	-0.166	-0.22	2.937	-0.132	-0.154	-0.163	4.463	-0.16	-0.185	-0.164	-0.149	-0.176	-0.132
aspartic-type signal peptidase activity	-0.039	-0.122	-0.23	-0.153	-0.185	-0.032	-0.163	-0.127	-0.16	-0.161	-0.273	-0.113	-0.128	-0.169	-0.124	-0.211	-0.178	-0.19	-0.144	-0.134	-0.108	-0.151	-0.166	-0.22	-0.34	-0.132	-0.154	-0.163	-0.224	-0.16	-0.185	-0.164	-0.149	-0.176	-0.132
aspartyl-tRNA aminoacylation	-0.055	-0.172	-0.325	4.508	-0.262	-0.045	-0.231	-0.255	-0.319	-0.323	-0.546	-0.226	-0.257	-0.339	-0.247	-0.423	-0.356	-0.381	-0.288	-0.267	-0.216	-0.301	-0.333	-0.441	-0.681	-0.264	-0.308	-0.327	-0.448	-0.319	-0.369	-0.328	-0.299	-0.353	-0.264
assembly of spliceosomal tri-snRNP								-0.18	-0.226	-0.228	-0.386	-0.16	-0.181	-0.239	-0.175	-0.299	-0.252	-0.269	-0.204	-0.189	-0.153	-0.213	-0.235	-0.312	-0.482	-0.187	-0.218	-0.231	-0.317	-0.226	-0.261	-0.232	-0.211	-0.249	-0.187
AT DNA binding	-0.039	-0.122	-0.23	-0.153	-0.185	-0.032	-0.163	-0.221	-0.276	-0.28	-0.473	-0.196	-0.222	-0.293	-0.214	-0.366	-0.308	-0.33	-0.25	-0.231	-0.187	-0.261	3.28	-0.382	-0.59	-0.229	3.572	-0.283	-0.388	-0.277	-0.32	-0.284	-0.259	-0.305	4.219
ATP adenylyltransferase activity	-0.055	-0.172	-0.325	-0.217	-0.262	-0.045	-0.231	-0.18	-0.226	-0.228	-0.386	-0.16	-0.181	-0.239	-0.175	-0.299	-0.252	-0.269	-0.204	-0.189	-0.153	-0.213	-0.235	-0.312	-0.482	-0.187	-0.218	-0.231	-0.317	-0.226	-0.261	-0.232	-0.211	-0.249	-0.187
ATP binding	0.751	2.031	2.013	1.736	0.685	-0.599	1.639	0.651	-0.236	-0.614	-3.774	-1.038	-0.86	-1.508	-1.43	-0.458	-1.828	-1.773	-0.156	-1.421	-0.835	-0.766	-1.679	0.256	2.812	-0.652	-0.286	-0.402	-0.569	-0.237	-1.289	-1.301	-1.665	-0.684	-1.012
ATP biosynthesis	-0.191	-0.598	2.624	10.19	-0.911	-0.156	9.499	0.595	0.142	0.119	-1.619	0.848	-0.762	0.025	0.658	-1.254	-0.073	-0.208	-0.855	-0.792	0.951	0.256	-0.987	0.306	0.202	0.523	2.468	2.229	4.234	1.232	1.755	1.151	1.433	1.929	1.828
ATP metabolism	-0.191	-0.598	2.624	10.19	-0.911	-0.156	9.499	0.595	0.142	0.119	-1.619	0.848	-0.762	0.025	0.658	-1.254	-0.073	-0.208	-0.855	-0.792	0.951	0.256	-0.987	0.306	0.202	0.523	2.468	2.229	4.234	1.232	1.755	1.151	1.433	1.929	1.828
ATP phosphoribosyltransferase activity	-0.039	-0.122	-0.23	-0.153	-0.185	-0.032	-0.163	-0.127	-0.16	-0.161	3.666	-0.113	-0.128	-0.169	-0.124	4.734	-0.178	-0.19	-0.144	-0.134	-0.108	-0.151	-0.166	-0.22	-0.34	-0.132	-0.154	-0.163	-0.224	-0.16	-0.185	-0.164	-0.149	-0.176	-0.132
ATP synthesis coupled electron transport	-0.141	-0.44	0.443	-0.553	-0.67	-0.115	-0.589	3.627	4.365	-0.626	-1.058	-0.438	-0.498	0.914	-0.48	-0.819	2.309	9.109	-0.559	-0.518	-0.418	-0.584	-0.645	0.376	1.222	1.48	1.122	0.992	2.767	-0.619	-0.716	0.983	1.189	3.853	1.479
ATP synthesis coupled electron transport (sensu Eukaryota)	-0.141	-0.44	0.443	-0.553	-0.67	-0.115	-0.589	3.627	4.365	-0.626	-1.058	-0.438	-0.498	0.914	-0.48	-0.819	2.309	9.109	-0.559	-0.518	-0.418	-0.584	-0.645	0.376	1.222	1.48	1.122	0.992	2.767	-0.619	-0.716	0.983	1.189	3.853	1.479
ATP synthesis coupled proton transport	-0.191	-0.598	2.624	10.19	-0.911	-0.156	9.499	0.626	0.172	0.149	-1.595	0.88	-0.751	0.055	0.689	-1.236	-0.043	-0.178	-0.843	-0.781	0.983	0.286	-0.973	0.349	0.264	0.553	2.531	2.289	4.334	1.277	1.813	1.196	1.48	1.988	1.877
ATP transport	-0.039	-0.122	-0.23	-0.153	-0.185	-0.032	-0.163	-0.18	-0.226	-0.228	-0.386	-0.16	-0.181	-0.239	-0.175	-0.299	-0.252	-0.269	-0.204	-0.189	-0.153	-0.213	-0.235	-0.312	-0.482	-0.187	-0.218	-0.231	-0.317	-0.226	-0.261	-0.232	-0.211	-0.249	-0.187
ATP\:ADP antiporter activity	-0.039	-0.122	-0.23	-0.153	-0.185	-0.032	-0.163	-0.18	-0.226	-0.228	-0.386	-0.16	-0.181	-0.239	-0.175	-0.299	-0.252	-0.269	-0.204	-0.189	-0.153	-0.213	-0.235	-0.312	1.836	-0.187	-0.218	-0.231	-0.317	-0.226	-0.261	-0.232	-0.211	-0.249	-0.187
ATPase activity	-0.285	0.26	0.851	6.268	-0.588	-0.233	7.501	-1.33	-1.012	-1.947	-2.936	-1.676	-1.345	-1.656	-1.833	0.343	-2.23	-2.441	-2.136	-1.979	-1.598	1.103	0.14	2.418	5.314	0.208	1.454	0.229	0.301	1.245	0.807	0.65	-0.293	-0.148	0.747
ATPase activity\, coupled	-0.146	-0.456	-0.861	1.214	0.798	-0.119	2.756	-1.643	-1.028	-1.572	-2.254	-1.456	-1.019	-1.695	-1.593	1.236	-1.828	-2.018	-1.856	-1.72	-1.389	0.774	0.33	2.493	5.318	0.765	1.741	0.411	-0.261	1.542	1.21	0.895	-0.283	0.069	0.764
ATPase activity\, coupled to movement of substances	-0.228	-0.713	1.023	8.308	-0.125	-0.186	8.793	-1.042	-0.509	-0.533	-2.23	-0.924	-1.049	-0.631	-1.011	-1.727	-0.736	-1.557	-1.178	-1.091	-0.882	-0.391	-1.359	2.915	2.9	-1.079	-0.435	1.779	0.491	1.082	0.574	0.987	1.32	0.008	-0.126
ATPase activity\, coupled to transmembrane movement of ions	-0.285	0.26	0.851	6.268	-0.588	-0.233	7.501	-0.859	-1.075	-1.088	-1.837	-0.761	-0.864	-1.14	-0.833	-1.423	-1.198	-1.283	-0.971	-0.899	-0.726	0.001	-1.12	0.653	1.141	-0.889	-0.042	1.723	0.596	0.848	0.435	1.708	1.041	0.564	0.263
ATPase activity\, coupled to transmembrane movement of ions\, phosphorylative mechanism	-0.371	-0.268	0.756	4.268	-1.171	-0.303	5.185	-0.557	-0.697	-0.705	-1.191	-0.494	-0.56	-0.739	-0.54	-0.922	-0.777	-0.832	-0.629	-0.583	-0.471	-0.658	-0.726	1.225	2.279	-0.577	-0.672	2.176	1.176	0.779	0.482	2.163	0.92	0.574	-0.577
ATPase activity\, coupled to transmembrane movement of substances	2.062	-0.499	0.633	4.151	-0.908	-0.339	4.31	-1.042	-0.509	-0.533	-2.23	-0.924	-1.049	-0.631	-1.011	-1.727	-0.736	-1.557	-1.178	-1.091	-0.882	-0.391	-1.359	2.915	2.9	-1.079	-0.435	1.779	0.491	1.082	0.574	0.987	1.32	0.008	-0.126
ATPase stimulator activity	-0.078	-0.244	-0.46	3.035	-0.371	-0.064	2.819	-0.285	-0.357	-0.361	-0.61	-0.253	-0.287	-0.379	-0.277	-0.473	-0.398	-0.426	-0.322	-0.299	-0.241	-0.337	-0.372	-0.493	0.705	-0.295	-0.344	-0.365	-0.501	-0.357	-0.413	-0.367	-0.334	-0.394	-0.295
ATP-dependent chromatin remodeling	-0.055	-0.172	-0.325	-0.217	-0.262	-0.045	-0.231	-0.46	-0.576	-0.583	1.203	-0.408	-0.463	-0.611	-0.446	-0.763	-0.642	-0.687	-0.52	-0.482	-0.389	-0.544	-0.6	-0.795	-1.229	-0.477	-0.556	-0.59	0.493	-0.576	-0.666	-0.592	-0.539	-0.636	-0.477
ATP-dependent DNA helicase activity	-0.103	-0.322	1.125	-0.406	-0.491	-0.084	-0.432	-0.511	0.969	-0.647	-1.093	-0.453	-0.514	-0.678	-0.495	-0.846	-0.713	-0.763	-0.577	-0.535	-0.432	-0.604	-0.666	0.309	0.277	-0.529	-0.617	-0.654	-0.897	-0.639	-0.739	-0.657	-0.599	-0.706	-0.529
ATP-dependent helicase activity	-0.187	-0.586	0.812	-0.737	-0.892	-0.153	-0.785	-1.112	-0.645	-1.408	-1.005	-0.986	-0.198	-1.477	-1.078	3.333	-1.552	-1.661	-1.257	-1.164	-0.941	1.842	2.143	-0.261	3.129	1.536	2.523	-1.424	-1.954	1.596	0.997	0.027	-1.303	-1.537	0.639
ATP-dependent peptidase activity	-0.055	-0.172	-0.325	-0.217	-0.262	-0.045	-0.231	-0.221	-0.276	-0.28	-0.473	-0.196	-0.222	-0.293	-0.214	-0.366	-0.308	-0.33	-0.25	-0.231	-0.187	-0.261	-0.288	-0.382	3.196	-0.229	-0.267	-0.283	-0.388	-0.277	-0.32	-0.284	-0.259	-0.305	-0.229
ATP-dependent proteolysis	-0.039	-0.122	-0.23	-0.153	-0.185	-0.032	-0.163	-0.127	-0.16	-0.161	-0.273	-0.113	-0.128	-0.169	-0.124	-0.211	-0.178	-0.19	-0.144	-0.134	-0.108	-0.151	-0.166	-0.22	2.937	-0.132	-0.154	-0.163	-0.224	-0.16	-0.185	-0.164	-0.149	-0.176	-0.132
ATP-dependent RNA helicase activity	-0.067	-0.211	-0.398	-0.265	-0.321	-0.055	-0.283	-0.639	-0.8	-0.809	0.212	-0.567	0.945	-0.848	-0.62	5.88	-0.892	-0.954	-0.722	-0.669	-0.54	3.326	4.122	0.804	-1.706	3.972	4.559	-0.818	-1.123	3.064	2.445	1.689	-0.749	-0.883	2.426
attachment of GPI anchor to protein								-0.255	-0.319	-0.323	-0.546	-0.226	-0.257	-0.339	-0.247	-0.423	-0.356	-0.381	-0.288	-0.267	-0.216	-0.301	-0.333	-0.441	-0.681	-0.264	-0.308	-0.327	-0.448	-0.319	-0.369	-0.328	-0.299	-0.353	-0.264
attachment of spindle microtubules to kinetochore	-0.039	-0.122	-0.23	-0.153	-0.185	-0.032	-0.163	4.382	3.434	-0.28	-0.473	-0.196	-0.222	-0.293	-0.214	-0.366	-0.308	-0.33	-0.25	-0.231	-0.187	-0.261	-0.288	-0.382	-0.59	-0.229	-0.267	-0.283	-0.388	-0.277	-0.32	-0.284	-0.259	-0.305	-0.229
autophagic vacuole formation	-0.055	-0.172	-0.325	-0.217	-0.262	-0.045	-0.231	-0.18	-0.226	4.266	-0.386	-0.16	-0.181	-0.239	-0.175	-0.299	-0.252	3.578	4.806	-0.189	6.481	-0.213	-0.235	-0.312	-0.482	-0.187	-0.218	-0.231	-0.317	-0.226	-0.261	-0.232	-0.211	-0.249	-0.187
autophagic vacuole fusion	-0.039	-0.122	-0.23	-0.153	-0.185	-0.032	6.126	-0.127	-0.16	-0.161	-0.273	-0.113	-0.128	-0.169	-0.124	-0.211	-0.178	-0.19	-0.144	-0.134	-0.108	-0.151	-0.166	-0.22	-0.34	-0.132	-0.154	-0.163	-0.224	-0.16	-0.185	-0.164	-0.149	-0.176	-0.132
autophagy	-0.207	-0.647	-0.351	-0.813	-0.985	-0.169	1.519	-0.723	-0.905	0.211	-1.548	0.947	-0.728	1.194	0.754	-1.198	-1.009	-0.116	1.695	-0.757	1.051	-0.855	-0.943	-1.25	-0.769	-0.749	-0.874	-0.927	0.391	-0.906	-1.047	-0.93	0.365	-1	-0.749
auxiliary transport protein activity	-0.039	-0.122	-0.23	6.528	-0.185	-0.032	-0.163	-0.127	-0.16	-0.161	-0.273	-0.113	-0.128	-0.169	-0.124	-0.211	-0.178	-0.19	-0.144	-0.134	-0.108	-0.151	-0.166	-0.22	-0.34	-0.132	-0.154	-0.163	-0.224	-0.16	-0.185	-0.164	-0.149	-0.176	-0.132
axial bud site selection	-0.146	-0.456	-0.861	-0.574	-0.695	-0.119	-0.612	-0.585	-0.733	-0.741	-0.391	-0.519	-0.589	-0.777	-0.568	-0.97	-0.817	-0.874	-0.662	-0.613	-0.495	-0.692	-0.764	-1.012	-0.13	-0.606	-0.707	-0.75	-0.004	0.672	-0.847	-0.753	0.809	-0.809	-0.606
azole transport	-0.039	-0.122	-0.23	-0.153	-0.185	-0.032	-0.163	-0.127	-0.16	-0.161	-0.273	-0.113	-0.128	-0.169	-0.124	-0.211	-0.178	-0.19	-0.144	-0.134	-0.108	-0.151	-0.166	-0.22	-0.34	-0.132	-0.154	-0.163	-0.224	-0.16	-0.185	-0.164	-0.149	-0.176	-0.132
azole transporter activity	-0.039	-0.122	-0.23	-0.153	-0.185	-0.032	-0.163	-0.127	-0.16	-0.161	-0.273	-0.113	-0.128	-0.169	-0.124	-0.211	-0.178	-0.19	-0.144	-0.134	-0.108	-0.151	-0.166	-0.22	-0.34	-0.132	-0.154	-0.163	-0.224	-0.16	-0.185	-0.164	-0.149	-0.176	-0.132
barbed-end actin filament capping	-0.055	-0.172	-0.325	-0.217	-0.262	-0.045	-0.231	-0.18	-0.226	-0.228	-0.386	-0.16	-0.181	-0.239	-0.175	-0.299	-0.252	-0.269	-0.204	-0.189	-0.153	-0.213	-0.235	-0.312	-0.482	-0.187	-0.218	-0.231	-0.317	-0.226	-0.261	-0.232	-0.211	-0.249	-0.187
barrier septum formation	-0.067	-0.211	-0.398	-0.265	-0.321	-0.055	-0.283	-0.221	-0.276	-0.28	-0.473	-0.196	-0.222	-0.293	-0.214	-0.366	-0.308	-0.33	-0.25	-0.231	-0.187	3.658	-0.288	-0.382	-0.59	4.221	3.572	3.347	-0.388	3.433	2.916	-0.284	-0.259	-0.305	-0.229
barrierpepsin activity	-0.039	-0.122	-0.23	-0.153	-0.185	-0.032	-0.163	-0.127	-0.16	-0.161	-0.273	-0.113	-0.128	-0.169	-0.124	-0.211	-0.178	-0.19	6.94	-0.134	-0.108	-0.151	-0.166	-0.22	-0.34	-0.132	-0.154	-0.163	-0.224	-0.16	-0.185	-0.164	-0.149	-0.176	-0.132
base-excision repair	-0.067	-0.211	-0.398	-0.265	-0.321	-0.055	-0.283	-0.423	-0.53	-0.536	-0.906	-0.375	-0.426	1.272	-0.411	-0.701	-0.591	1.01	1.66	-0.443	-0.358	-0.5	-0.552	-0.731	-0.141	-0.438	-0.511	-0.542	-0.744	-0.53	-0.613	-0.544	-0.496	-0.585	-0.439
base-excision repair\, AP site formation	-0.039	-0.122	-0.23	-0.153	-0.185	-0.032	-0.163	-0.221	-0.276	-0.28	-0.473	-0.196	-0.222	-0.293	-0.214	-0.366	-0.308	-0.33	-0.25	-0.231	-0.187	-0.261	-0.288	-0.382	1.303	-0.229	-0.267	-0.283	-0.388	-0.277	-0.32	-0.284	-0.259	-0.305	-0.229
base-excision repair\, gap-filling	-0.103	-0.322	-0.608	-0.406	-0.491	-0.084	1.947	-0.127	-0.16	-0.161	-0.273	-0.113	-0.128	-0.169	-0.124	-0.211	-0.178	-0.19	-0.144	-0.134	-0.108	-0.151	-0.166	-0.22	-0.34	-0.132	-0.154	-0.163	-0.224	-0.16	-0.185	-0.164	-0.149	-0.176	-0.132
basic amino acid permease activity	-0.039	-0.122	-0.23	-0.153	-0.185	-0.032	-0.163	-0.127	-0.16	-0.161	-0.273	-0.113	-0.128	-0.169	-0.124	-0.211	-0.178	-0.19	-0.144	-0.134	-0.108	-0.151	-0.166	-0.22	-0.34	-0.132	-0.154	-0.163	-0.224	-0.16	-0.185	-0.164	-0.149	-0.176	-0.132
basic amino acid transport	-0.078	-0.244	-0.46	3.035	-0.371	-0.064	-0.327	-0.312	-0.391	-0.396	-0.668	-0.277	-0.314	-0.415	-0.303	-0.518	-0.436	-0.467	-0.353	-0.327	-0.264	-0.369	-0.408	-0.54	-0.834	-0.324	-0.377	-0.4	1.365	-0.391	-0.452	-0.402	-0.366	-0.432	-0.324
basic amino acid transporter activity	-0.087	-0.272	-0.514	2.647	-0.415	-0.071	-0.365	-0.285	-0.357	-0.361	-0.61	-0.253	-0.287	-0.379	-0.277	-0.473	-0.398	-0.426	-0.322	-0.299	-0.241	-0.337	-0.372	-0.493	-0.762	-0.295	-0.344	-0.365	1.596	-0.357	-0.413	-0.367	-0.334	-0.394	-0.295
behavior	-0.055	-0.172	-0.325	-0.217	-0.262	-0.045	-0.231	-0.221	-0.276	-0.28	-0.473	-0.196	-0.222	-0.293	-0.214	-0.366	-0.308	-0.33	-0.25	-0.231	-0.187	-0.261	-0.288	-0.382	-0.59	-0.229	-0.267	-0.283	-0.388	-0.277	-0.32	-0.284	-0.259	-0.305	-0.229
beta DNA polymerase activity	-0.039	-0.122	-0.23	-0.153	-0.185	-0.032	-0.163	-0.127	-0.16	-0.161	-0.273	-0.113	-0.128	-0.169	-0.124	-0.211	-0.178	-0.19	-0.144	-0.134	-0.108	-0.151	-0.166	-0.22	-0.34	-0.132	-0.154	-0.163	-0.224	-0.16	-0.185	-0.164	-0.149	-0.176	-0.132
beta-1\,3 glucan biosynthesis	-0.078	3.925	-0.46	3.035	2.419	-0.064	-0.327	-0.255	-0.319	-0.323	-0.546	-0.226	-0.257	-0.339	-0.247	-0.423	-0.356	-0.381	-0.288	-0.267	-0.216	-0.301	-0.333	1.94	0.958	-0.264	-0.308	2.817	1.896	-0.319	-0.369	2.805	3.122	-0.353	3.588
beta-1\,3 glucan metabolism	-0.078	3.925	-0.46	3.035	2.419	-0.064	-0.327	-0.255	-0.319	-0.323	-0.546	-0.226	-0.257	-0.339	-0.247	-0.423	-0.356	-0.381	-0.288	-0.267	-0.216	-0.301	-0.333	1.94	0.958	-0.264	-0.308	2.817	1.896	-0.319	-0.369	2.805	3.122	-0.353	3.588
beta-1\,4-mannosyltransferase activity								-0.127	-0.16	-0.161	-0.273	-0.113	-0.128	-0.169	-0.124	-0.211	-0.178	-0.19	-0.144	-0.134	-0.108	-0.151	-0.166	-0.22	-0.34	-0.132	-0.154	-0.163	-0.224	-0.16	-0.185	-0.164	-0.149	-0.176	-0.132
beta-1\,6 glucan biosynthesis	-0.055	-0.172	-0.325	-0.217	-0.262	-0.045	-0.231	-0.221	-0.276	3.39	-0.473	-0.196	4.352	-0.293	-0.214	2.49	-0.308	-0.33	-0.25	4.171	-0.187	-0.261	-0.288	-0.382	-0.59	-0.229	-0.267	-0.283	-0.388	-0.277	-0.32	-0.284	-0.259	-0.305	-0.229
beta-1\,6 glucan metabolism	-0.055	-0.172	-0.325	-0.217	-0.262	-0.045	-0.231	-0.255	-0.319	2.856	-0.546	-0.226	3.705	-0.339	-0.247	2.051	-0.356	-0.381	-0.288	3.546	-0.216	-0.301	-0.333	-0.441	-0.681	-0.264	-0.308	-0.327	-0.448	-0.319	-0.369	-0.328	-0.299	-0.353	-0.264
beta-alanine biosynthesis	-0.055	-0.172	-0.325	-0.217	-0.262	-0.045	-0.231	-0.18	-0.226	-0.228	-0.386	-0.16	-0.181	-0.239	-0.175	-0.299	-0.252	-0.269	-0.204	-0.189	-0.153	-0.213	-0.235	-0.312	1.836	-0.187	-0.218	-0.231	2.998	-0.226	-0.261	-0.232	-0.211	3.887	-0.187
beta-alanine metabolism	-0.055	-0.172	-0.325	-0.217	-0.262	-0.045	-0.231	-0.18	-0.226	-0.228	-0.386	-0.16	-0.181	-0.239	-0.175	-0.299	-0.252	-0.269	-0.204	-0.189	-0.153	-0.213	-0.235	-0.312	1.836	-0.187	-0.218	-0.231	2.998	-0.226	-0.261	-0.232	-0.211	3.887	-0.187
beta-glucan biosynthesis	-0.095	3.106	-0.563	2.354	1.824	-0.078	-0.4	-0.338	-0.423	1.976	-0.722	-0.299	2.656	-0.448	-0.327	1.311	-0.471	-0.504	-0.381	2.53	-0.285	-0.399	-0.44	1.217	0.338	-0.35	-0.408	1.945	1.18	-0.423	-0.489	1.935	2.191	-0.467	2.563
beta-glucan metabolism	-0.095	3.106	-0.563	2.354	1.824	-0.078	-0.4	-0.361	-0.452	1.791	-0.772	-0.32	2.439	-0.479	-0.35	1.152	-0.504	-0.539	-0.408	2.319	-0.305	-0.427	-0.471	1.06	0.196	-0.374	-0.436	1.762	1.024	-0.452	-0.522	1.752	1.997	-0.499	2.351
beta-glucosidase activity	-0.087	-0.272	-0.514	-0.343	-0.415	-0.071	-0.365	-0.285	-0.357	-0.361	-0.61	-0.253	-0.287	-0.379	-0.277	-0.473	-0.398	-0.426	-0.322	-0.299	-0.241	-0.337	-0.372	1.636	-0.762	-0.295	-0.344	-0.365	-0.501	-0.357	-0.413	-0.367	-0.334	-0.394	-0.295
beta-tubulin binding	-0.055	-0.172	-0.325	-0.217	-0.262	-0.045	-0.231	-0.18	-0.226	-0.228	-0.386	-0.16	-0.181	-0.239	-0.175	-0.299	-0.252	-0.269	-0.204	-0.189	-0.153	-0.213	-0.235	-0.312	1.836	-0.187	-0.218	-0.231	-0.317	-0.226	-0.261	-0.232	-0.211	-0.249	-0.187
beta-tubulin folding	-0.067	-0.211	-0.398	-0.265	-0.321	-0.055	-0.283	-0.221	-0.276	-0.28	-0.473	-0.196	-0.222	-0.293	-0.214	-0.366	-0.308	-0.33	-0.25	-0.231	-0.187	-0.261	-0.288	-0.382	1.303	-0.229	-0.267	-0.283	-0.388	-0.277	-0.32	-0.284	-0.259	-0.305	-0.229
bicarbonate transporter activity	-0.039	-0.122	-0.23	-0.153	-0.185	-0.032	-0.163	-0.127	-0.16	-0.161	-0.273	-0.113	-0.128	-0.169	-0.124	-0.211	-0.178	-0.19	-0.144	-0.134	-0.108	-0.151	-0.166	-0.22	-0.34	-0.132	-0.154	-0.163	-0.224	-0.16	-0.185	-0.164	-0.149	-0.176	-0.132
bile acid transport	-0.055	5.722	-0.325	-0.217	-0.262	-0.045	-0.231	-0.127	-0.16	-0.161	-0.273	-0.113	-0.128	-0.169	-0.124	-0.211	-0.178	-0.19	-0.144	-0.134	-0.108	-0.151	-0.166	-0.22	-0.34	-0.132	-0.154	-0.163	-0.224	-0.16	-0.185	-0.164	-0.149	-0.176	-0.132
bile acid transporter activity	-0.039	-0.122	-0.23	-0.153	-0.185	-0.032	-0.163	-0.18	-0.226	-0.228	-0.386	-0.16	-0.181	-0.239	-0.175	-0.299	-0.252	-0.269	-0.204	5.202	-0.153	-0.213	-0.235	3.054	1.836	-0.187	-0.218	-0.231	-0.317	-0.226	-0.261	-0.232	-0.211	-0.249	-0.187
bile acid\:sodium symporter activity	-0.039	8.213	-0.23	-0.153	-0.185	-0.032	-0.163	-0.127	-0.16	-0.161	-0.273	-0.113	-0.128	-0.169	-0.124	-0.211	-0.178	-0.19	-0.144	7.49	-0.108	-0.151	-0.166	4.539	2.937	-0.132	-0.154	-0.163	-0.224	-0.16	-0.185	-0.164	-0.149	-0.176	-0.132
bilirubin transport	-0.055	5.722	2.916	-0.217	-0.262	-0.045	4.217	-0.18	-0.226	-0.228	-0.386	-0.16	-0.181	-0.239	-0.175	-0.299	-0.252	-0.269	-0.204	-0.189	-0.153	-0.213	-0.235	3.054	1.836	-0.187	-0.218	-0.231	-0.317	-0.226	-0.261	-0.232	-0.211	-0.249	-0.187
bilirubin transporter activity	-0.055	5.722	2.916	-0.217	-0.262	-0.045	4.217	-0.18	-0.226	-0.228	-0.386	-0.16	-0.181	-0.239	-0.175	-0.299	-0.252	-0.269	-0.204	-0.189	-0.153	-0.213	-0.235	3.054	1.836	-0.187	-0.218	-0.231	-0.317	-0.226	-0.261	-0.232	-0.211	-0.249	-0.187
binding	0.827	3.981	3.266	1.577	3.191	-0.381	1.468	-1.238	-2.444	-1.905	-4.638	-1.673	-1.533	-2.499	-1.063	0.726	-4.143	-3.398	-2.462	-2.275	-2.203	0.36	0.753	-1.218	0.085	0.046	0.936	-0.668	-2.663	-0.265	-0.145	-1.798	-2.389	-2.828	-1.04
biogenic amine biosynthesis	-0.151	-0.472	-0.891	-0.594	-0.72	-0.123	2.62	-0.542	-0.678	-0.686	-1.159	-0.48	-0.545	-0.719	-0.525	0.27	-0.756	-0.809	-0.612	-0.567	-0.458	-0.64	-0.707	0.187	-0.673	1.258	0.915	0.79	-0.952	-0.678	-0.784	-0.697	-0.635	-0.749	-0.561
biogenic amine catabolism	-0.117	-0.366	-0.69	-0.46	-0.557	-0.095	-0.49	2.119	1.528	1.5	1.63	2.478	2.101	1.387	2.207	0.897	-0.563	1.119	1.786	1.99	2.628	-0.477	-0.526	0.809	3.072	-0.418	1.617	-0.517	3.741	-0.505	1.189	-0.519	-0.473	3.145	-0.418
biogenic amine metabolism	-0.203	-0.635	-1.198	-0.799	-0.967	-0.166	1.578	0.724	0.266	0.243	-0.104	0.982	0.71	0.149	0.788	0.602	-0.993	-0.083	0.471	0.628	1.087	-0.841	-0.929	0.484	1.641	2.038	2.733	2.485	1.282	-0.891	-0.021	-0.915	-0.834	1.123	0.65
biological process unknown	-0.078	-0.244	-0.46	-0.306	-0.371	-0.064	-0.327	-0.285	-0.357	-0.361	-0.61	-0.253	-0.287	-0.379	-0.277	-0.473	-0.398	-0.426	-0.322	-0.299	-0.241	-0.337	-0.372	1.636	0.705	-0.295	-0.344	2.447	1.596	-0.357	-0.413	-0.367	-0.334	-0.394	-0.295
biological_process	1.267	3.316	4.806	3.689	2.133	-0.192	2.868	-1.376	-1.249	-2.024	0.101	-2.254	-0.466	-2.514	-1.678	-0.259	-2.468	-1.906	-1.953	-0.923	-0.03	0.018	-0.988	0.67	0.537	1.453	1.424	0.823	-0.275	-1.248	-0.15	0.862	1.404	1.796	0.628
biopolymer biosynthesis	-0.199	1.017	-1.175	0.531	1.246	-0.162	-0.835	2.218	0.3	7.258	0.665	1.019	0.745	5.744	3.83	0.65	2.208	3.935	1.803	0.662	-0.592	-0.828	-0.913	-0.339	-0.67	-0.725	-0.846	0.254	0.486	-0.877	-1.014	0.246	0.432	0.103	0.685
biopolymer catabolism	-0.373	-1.168	0.727	-1.47	-0.59	-0.305	-0.896	0.445	0.201	0.155	-2.02	0.119	-0.243	-0.035	-0.137	-1.343	-0.233	-0.507	1.207	-0.356	0.253	-1.846	-2.037	-1.9	-0.321	-1.618	-1.886	-2.001	-0.778	-1.956	-2.261	-2.009	-1.831	-1.669	-1.618
biopolymer glycosylation	-0.271	0.362	3.057	0.873	4.377	8.932	1.602	-1.066	-1.334	-1.35	0.106	-0.945	-1.073	-0.679	-1.034	-1.766	-1.487	-1.592	-1.205	-1.116	-0.902	-1.26	-0.642	-0.689	-1.655	-1.104	-1.287	-1.365	-0.737	-0.556	-1.543	-1.371	-1.249	-1.474	-1.104
biopolymer metabolism	1.672	3.948	3.968	2.091	0.465	2.574	1.577	-1.044	-2.198	-0.77	-1.538	-2.577	-1.11	-2.34	-3.006	4.548	-2.606	-3.498	-0.561	-1.751	-2.228	-1.104	0.356	-4.878	-5.853	-1.403	-0.547	-4.405	-7.139	-2.594	-1.531	-2.71	-4.16	-6.267	-2.118
biopolymer methylation	-0.165	-0.518	-0.977	-0.651	-0.789	-0.135	0.792	-0.652	-0.816	-0.825	4.8	-0.578	-0.656	0.329	-0.632	3.781	-0.909	-0.973	-0.736	-0.682	-0.551	-0.77	0.365	-1.126	-1.74	-0.675	0.52	-0.835	-1.145	-0.816	0.158	-0.838	-0.764	-0.901	-0.675
biopolymer modification	-0.826	4.831	4.236	2.352	1.607	2.626	1.81	-0.352	-0.848	-1.212	-0.689	-1.635	-1.45	-0.721	-2.001	-1.104	-1.097	-1.619	0.18	-0.967	-1.448	-2.567	-1.688	-2.763	-3.856	-2.279	-1.487	-2.972	-3.944	-2.568	-2.626	-2.154	-2.526	-3.636	-2.624
biosynthesis	-0.027	-0.318	3.288	2.946	-0.833	1.75	0.373	-1.177	-1.723	-0.686	4.318	-2.538	-1.497	-1.801	-0.354	-2.549	-1.033	-0.405	-1.313	-0.136	-0.613	-0.97	-2.312	-0.469	-2.253	1.067	-0.434	1.242	0.98	-1.719	-1.632	-0.598	-0.142	-0.922	0.515
biotin binding	-0.067	-0.211	-0.398	-0.265	-0.321	-0.055	-0.283	-0.285	-0.357	-0.361	1.152	-0.253	-0.287	2.339	3.397	-0.473	-0.398	-0.426	-0.322	-0.299	-0.241	-0.337	-0.372	-0.493	0.705	-0.295	-0.344	5.26	1.596	-0.357	-0.413	2.435	-0.334	2.222	-0.295
biotin biosynthesis	-0.078	-0.244	-0.46	-0.306	-0.371	-0.064	-0.327	3.731	2.894	2.856	1.424	-0.226	3.705	-0.339	3.859	2.051	2.544	2.34	3.255	3.546	4.476	3.093	2.758	1.94	0.958	3.589	3.017	2.817	1.896	2.894	2.433	2.805	3.122	-0.353	-0.264
biotin carboxylase activity								-0.127	-0.16	-0.161	3.666	-0.113	-0.128	-0.169	-0.124	-0.211	-0.178	-0.19	-0.144	-0.134	-0.108	-0.151	-0.166	-0.22	-0.34	-0.132	-0.154	-0.163	-0.224	-0.16	-0.185	-0.164	-0.149	-0.176	-0.132
biotin carboxylase complex								-0.127	-0.16	-0.161	3.666	-0.113	-0.128	-0.169	-0.124	-0.211	-0.178	-0.19	-0.144	-0.134	-0.108	-0.151	-0.166	-0.22	-0.34	-0.132	-0.154	-0.163	-0.224	-0.16	-0.185	-0.164	-0.149	-0.176	-0.132
biotin metabolism	-0.078	-0.244	-0.46	-0.306	-0.371	-0.064	-0.327	3.731	2.894	2.856	1.424	-0.226	3.705	-0.339	3.859	2.051	2.544	2.34	3.255	3.546	4.476	3.093	2.758	1.94	0.958	3.589	3.017	2.817	1.896	2.894	2.433	2.805	3.122	-0.353	-0.264
biotin synthase activity	-0.039	-0.122	-0.23	-0.153	-0.185	-0.032	-0.163	7.843	-0.16	6.194	3.666	-0.113	7.793	-0.169	8.087	4.734	5.621	5.251	6.94	7.49	9.273	-0.151	-0.166	-0.22	-0.34	-0.132	-0.154	-0.163	-0.224	-0.16	-0.185	-0.164	-0.149	-0.176	-0.132
biotin transport								-0.127	-0.16	-0.161	-0.273	-0.113	-0.128	-0.169	-0.124	-0.211	-0.178	-0.19	-0.144	-0.134	-0.108	-0.151	-0.166	-0.22	-0.34	-0.132	-0.154	6.123	-0.224	-0.16	-0.185	6.099	-0.149	-0.176	-0.132
biotin transporter activity								-0.127	-0.16	-0.161	-0.273	-0.113	-0.128	-0.169	-0.124	-0.211	-0.178	-0.19	-0.144	-0.134	-0.108	-0.151	-0.166	-0.22	-0.34	-0.132	-0.154	6.123	-0.224	-0.16	-0.185	6.099	-0.149	-0.176	-0.132
biotin-[acetyl-CoA-carboxylase] ligase activity								-0.127	-0.16	-0.161	-0.273	-0.113	-0.128	-0.169	-0.124	-0.211	-0.178	-0.19	-0.144	-0.134	-0.108	-0.151	-0.166	-0.22	-0.34	-0.132	-0.154	-0.163	-0.224	-0.16	-0.185	-0.164	-0.149	-0.176	-0.132
biotin-[methylcrotonoyl-CoA-carboxylase] ligase activity								-0.127	-0.16	-0.161	-0.273	-0.113	-0.128	-0.169	-0.124	-0.211	-0.178	-0.19	-0.144	-0.134	-0.108	-0.151	-0.166	-0.22	-0.34	-0.132	-0.154	-0.163	-0.224	-0.16	-0.185	-0.164	-0.149	-0.176	-0.132
biotin-[methylmalonyl-CoA-carboxytransferase] ligase activity								-0.127	-0.16	-0.161	-0.273	-0.113	-0.128	-0.169	-0.124	-0.211	-0.178	-0.19	-0.144	-0.134	-0.108	-0.151	-0.166	-0.22	-0.34	-0.132	-0.154	-0.163	-0.224	-0.16	-0.185	-0.164	-0.149	-0.176	-0.132
biotin-[propionyl-CoA-carboxylase (ATP-hydrolyzing)] ligase activity								-0.127	-0.16	-0.161	-0.273	-0.113	-0.128	-0.169	-0.124	-0.211	-0.178	-0.19	-0.144	-0.134	-0.108	-0.151	-0.166	-0.22	-0.34	-0.132	-0.154	-0.163	-0.224	-0.16	-0.185	-0.164	-0.149	-0.176	-0.132
biotin-protein ligase activity								-0.127	-0.16	-0.161	-0.273	-0.113	-0.128	-0.169	-0.124	-0.211	-0.178	-0.19	-0.144	-0.134	-0.108	-0.151	-0.166	-0.22	-0.34	-0.132	-0.154	-0.163	-0.224	-0.16	-0.185	-0.164	-0.149	-0.176	-0.132
bipolar bud site selection	-0.165	1.451	0.106	7.24	8.434	-0.135	0.792	-0.723	-0.905	-0.916	-1.548	-0.641	-0.728	-0.961	-0.702	-0.322	-1.009	-1.081	-0.817	-0.757	-0.612	-0.855	-0.943	-1.25	-1.932	-0.749	-0.874	-0.927	-0.44	0.233	-1.047	-0.93	-0.848	-1	-0.749
bis(5????-nucleosidyl) oligophosphate metabolism								-0.127	-0.16	-0.161	-0.273	-0.113		-0.169	-0.124	-0.211	-0.178	-0.19	-0.144	-0.134	-0.108	-0.151	-0.166	-0.22	-0.34	-0.132	-0.154	-0.163	-0.224	-0.16	-0.185	-0.164	-0.149	-0.176	-0.132
bis(5????-nucleosyl)-tetraphosphatase (asymmetrical) activity								-0.127	-0.16	-0.161	-0.273	-0.113		-0.169	-0.124	-0.211	-0.178	-0.19	-0.144	-0.134	-0.108	-0.151	-0.166	-0.22	-0.34	-0.132	-0.154	-0.163	-0.224	-0.16	-0.185	-0.164	-0.149	-0.176	-0.132
bis(5????-nucleosyl)-tetraphosphatase activity								-0.18	-0.226	-0.228	-0.386	-0.16		-0.239	-0.175	-0.299	-0.252	-0.269	-0.204	-0.189	-0.153	-0.213	-0.235	-0.312	-0.482	-0.187	-0.218	-0.231	-0.317	-0.226	-0.261	-0.232	-0.211	-0.249	-0.187
bis(5¢®?-nucleosidyl) oligophosphate metabolism	-0.039	-0.122	-0.23	-0.153	-0.185	-0.032	-0.163
bis(5¢®?-nucleosyl)-tetraphosphatase (asymmetrical) activity	-0.039	-0.122	-0.23	-0.153	-0.185	-0.032	-0.163
bis(5¢®?-nucleosyl)-tetraphosphatase activity	-0.055	-0.172	-0.325	-0.217	-0.262	-0.045	-0.231
bleomycin hydrolase activity	-0.039	-0.122	-0.23	-0.153	-0.185	-0.032	-0.163	-0.127	-0.16	-0.161	-0.273	-0.113	-0.128	-0.169	-0.124	-0.211	-0.178	-0.19	-0.144	-0.134	-0.108	-0.151	-0.166	-0.22	-0.34	-0.132	-0.154	-0.163	-0.224	-0.16	-0.185	-0.164	-0.149	-0.176	-0.132
branched chain family amino acid biosynthesis	-0.11	-0.345	0.971	1.931	1.449	-0.09	-0.462	-0.478	-0.598	-0.605	0.032	-0.423	1.639	-0.634	-0.463	-0.791	-0.666	0.743	1.356	3.58	-0.404	-0.565	-0.623	-0.825	0.479	-0.495	-0.577	-0.612	-0.839	-0.598	-0.691	-0.614	-0.56	-0.66	-0.495
branched chain family amino acid catabolism	-0.103	-0.322	-0.608	-0.406	-0.491	-0.084	-0.432	2.677	2.007	1.976	0.768	3.089	2.656	1.849	2.778	1.311	-0.471	1.554	2.298	2.53	3.262	-0.399	-0.44	1.217	2.817	-0.35	2.107	-0.432	2.952	-0.423	1.631	-0.434	-0.396	1.745	-0.35
branched chain family amino acid metabolism	-0.156	-0.488	0.227	1.06	0.654	-0.127	-0.654	1.104	0.622	0.599	0.401	1.383	2.781	0.502	1.173	0.064	-0.836	1.43	2.35	4.258	1.497	-0.708	-0.782	-0.019	1.901	-0.621	0.697	-0.768	0.95	-0.75	0.33	-0.771	-0.702	0.421	-0.621
branched-chain-amino-acid transaminase activity	-0.039	-0.122	-0.23	-0.153	-0.185	-0.032	-0.163	-0.18	-0.226	-0.228	-0.386	-0.16	5.42	-0.239	-0.175	-0.299	-0.252	-0.269	4.806	5.202	-0.153	-0.213	-0.235	-0.312	-0.482	-0.187	-0.218	-0.231	-0.317	-0.226	-0.261	-0.232	-0.211	-0.249	-0.187
bud	2.638	0.859	1.163	0.973	3.535	-0.28	0.749	-1.472	-1.842	-0.735	-0.001	-1.305	-0.778	-1.954	-1.427	-1.121	-2.054	-2.198	-1.663	-1.541	-1.245	-0.534	-0.273	-1.698	-2.475	-0.84	-0.597	-0.769	-1.338	-0.131	-0.637	-0.78	-0.51	-0.996	-0.841
bud neck	-0.039	-0.122	-0.23	-0.153	-0.185	-0.032	-0.163	-1.28	-1.603	-0.332	0.457	-1.135	-1.289	-1.7	-1.242	-1.118	-1.787	-1.913	-1.447	-1.341	-1.083	-1.513	-1.043	-2.213	-2.422	-1.326	-1.546	-1.64	-1.775	-0.951	-1.285	-1.647	-0.807	-1.77	-1.327
bud scar	-0.26	1.715	2.636	5.055	4.681	-0.212	0.818	-0.127	-0.16	-0.161	-0.273	-0.113	-0.128	-0.169	-0.124	-0.211	-0.178	-0.19	-0.144	-0.134	-0.108	-0.151	-0.166	-0.22	-0.34	-0.132	-0.154	-0.163	-0.224	-0.16	-0.185	-0.164	-0.149	-0.176	-0.132
bud site selection	4.347	2.267	0.322	2.687	2.906	-0.18	1.306	-1.01	-1.264	-1.279	-0.651	-0.895	-0.004	-1.341	-0.979	0.222	-1.409	-1.508	-1.141	-1.057	-0.854	0.54	0.262	-1.137	-1.859	-0.062	-0.37	-1.293	-1.176	0.377	-0.03	0.302	0.564	-1.396	-1.046
bud tip	2.227	1.318	1.883	1.856	3.808	-0.32	0.276	-0.829	-1.038	-1.05	-1.164	-0.735	0.392	-1.102	-0.804	-0.608	-1.157	-1.239	-0.937	-0.869	-0.702	0.071	0.833	-0.696	-1.2	-0.859	0.028	-0.089	-0.732	-0.043	0.535	-0.096	-0.972	-0.241	-0.859
budding cell apical bud growth	-0.087	-0.272	3.587	2.647	2.081	-0.071	2.449	-0.404	-0.505	-0.511	0.383	-0.358	-0.406	-0.536	-0.391	-0.669	-0.563	-0.603	-0.456	-0.423	-0.341	-0.477	-0.526	-0.697	-1.078	-0.418	-0.487	-0.517	-0.709	-0.505	-0.584	-0.519	-0.473	-0.558	-0.418
budding cell bud growth	-0.174	1.322	3.079	2.308	1.669	-0.142	2.088	-0.688	-0.862	-0.872	-0.739	-0.61	-0.693	-0.914	-0.668	-1.141	-0.961	-1.028	-0.778	-0.721	-0.582	1.713	1.403	0.583	-0.008	-0.713	0.406	-0.882	-1.21	1.531	1.09	1.447	1.74	-0.952	0.721
budding cell isotropic bud growth	-0.078	-0.244	4.125	3.035	2.419	-0.064	-0.327	-0.383	-0.479	-0.485	0.495	-0.339	-0.385	-0.508	-0.371	-0.634	-0.534	-0.572	-0.433	-0.401	-0.324	-0.452	-0.499	-0.661	-1.022	-0.396	-0.462	-0.49	-0.673	-0.479	-0.554	-0.492	-0.449	-0.529	-0.397
butanediol fermentation	-0.039	-0.122	-0.23	-0.153	-0.185	-0.032	-0.163	-0.127	-0.16	6.194	-0.273	-0.113	-0.128	-0.169	-0.124	-0.211	-0.178	-0.19	-0.144	-0.134	-0.108	-0.151	-0.166	-0.22	-0.34	-0.132	-0.154	-0.163	-0.224	-0.16	-0.185	-0.164	-0.149	-0.176	-0.132
butyrate metabolism	-0.039	-0.122	-0.23	-0.153	-0.185	-0.032	-0.163	-0.127	-0.16	-0.161	-0.273	-0.113	-0.128	5.906	-0.124	-0.211	-0.178	-0.19	-0.144	-0.134	-0.108	-0.151	-0.166	-0.22	-0.34	-0.132	-0.154	-0.163	-0.224	-0.16	-0.185	-0.164	-0.149	-0.176	-0.132
bypass DNA synthesis	-0.039	-0.122	-0.23	-0.153	-0.185	-0.032	-0.163	-0.127	-0.16	-0.161	-0.273	-0.113	-0.128	-0.169	-0.124	-0.211	-0.178	-0.19	-0.144	-0.134	-0.108	-0.151	-0.166	-0.22	2.937	-0.132	-0.154	-0.163	-0.224	-0.16	-0.185	-0.164	-0.149	-0.176	-0.132
C-3 sterol dehydrogenase (C-4 sterol decarboxylase) activity								-0.127	-0.16	-0.161	3.666	-0.113	-0.128	-0.169	-0.124	-0.211	-0.178	-0.19	-0.144	-0.134	-0.108	-0.151	-0.166	-0.22	-0.34	-0.132	-0.154	-0.163	-0.224	-0.16	-0.185	-0.164	-0.149	-0.176	-0.132
C-4 methylsterol oxidase activity								-0.127	-0.16	-0.161	-0.273	-0.113	-0.128	-0.169	-0.124	-0.211	-0.178	-0.19	-0.144	-0.134	-0.108	-0.151	-0.166	-0.22	-0.34	-0.132	-0.154	6.123	-0.224	-0.16	-0.185	-0.164	-0.149	-0.176	-0.132
C-8 sterol isomerase activity	-0.039	-0.122	-0.23	6.528	-0.185	-0.032	6.126	-0.127	-0.16	-0.161	-0.273	-0.113	-0.128	-0.169	-0.124	-0.211	-0.178	-0.19	-0.144	-0.134	-0.108	-0.151	-0.166	-0.22	-0.34	-0.132	-0.154	6.123	-0.224	-0.16	-0.185	-0.164	-0.149	-0.176	-0.132
C-acetyltransferase activity								-0.127	-0.16	-0.161	-0.273	-0.113	-0.128	-0.169	-0.124	-0.211	-0.178	-0.19	-0.144	-0.134	-0.108	-0.151	-0.166	-0.22	-0.34	-0.132	-0.154	-0.163	-0.224	-0.16	-0.185	-0.164	-0.149	-0.176	-0.132
C-acyltransferase activity	-0.039	-0.122	-0.23	-0.153	-0.185	-0.032	-0.163	-0.312	-0.391	-0.396	2.549	-0.277	-0.314	-0.415	-0.303	-0.518	-0.436	-0.467	-0.353	-0.327	-0.264	-0.369	-0.408	-0.54	0.504	-0.324	-0.377	-0.4	-0.549	-0.391	-0.452	-0.402	-0.366	-0.432	-0.324
cadmium ion homeostasis	-0.039	-0.122	4.353	-0.153	-0.185	-0.032	-0.163	-0.127	-0.16	-0.161	-0.273	-0.113	-0.128	-0.169	-0.124	-0.211	-0.178	-0.19	-0.144	-0.134	-0.108	-0.151	-0.166	-0.22	-0.34	-0.132	-0.154	-0.163	-0.224	-0.16	-0.185	-0.164	-0.149	-0.176	-0.132
cadmium ion transport	-0.039	-0.122	-0.23	-0.153	-0.185	-0.032	6.126	-0.127	-0.16	-0.161	-0.273	-0.113	-0.128	-0.169	-0.124	-0.211	-0.178	-0.19	-0.144	-0.134	-0.108	-0.151	-0.166	-0.22	-0.34	-0.132	-0.154	-0.163	-0.224	-0.16	-0.185	-0.164	-0.149	-0.176	-0.132
cadmium ion transporter activity	-0.039	-0.122	-0.23	-0.153	-0.185	-0.032	6.126	-0.127	-0.16	-0.161	-0.273	-0.113	-0.128	-0.169	-0.124	-0.211	-0.178	-0.19	-0.144	-0.134	-0.108	-0.151	-0.166	-0.22	-0.34	-0.132	-0.154	-0.163	-0.224	-0.16	-0.185	-0.164	-0.149	-0.176	-0.132
calcineurin complex	-0.078	-0.244	-0.46	3.035	2.419	-0.064	2.819	-0.255	-0.319	-0.323	-0.546	-0.226	-0.257	-0.339	-0.247	-0.423	-0.356	-0.381	-0.288	-0.267	-0.216	-0.301	-0.333	-0.441	-0.681	-0.264	-0.308	-0.327	-0.448	-0.319	-0.369	-0.328	-0.299	-0.353	-0.264
calcium activated cation channel activity	-0.039	-0.122	-0.23	-0.153	-0.185	-0.032	-0.163	-0.127	6.266	-0.161	-0.273	-0.113	-0.128	-0.169	-0.124	-0.211	-0.178	-0.19	6.94	7.49	-0.108	-0.151	-0.166	-0.22	-0.34	-0.132	-0.154	-0.163	-0.224	-0.16	-0.185	-0.164	-0.149	-0.176	-0.132
calcium- and calmodulin-dependent protein kinase activity	-0.055	-0.172	-0.325	-0.217	-0.262	-0.045	-0.231	-0.18	-0.226	-0.228	-0.386	-0.16	-0.181	-0.239	-0.175	-0.299	-0.252	-0.269	-0.204	-0.189	-0.153	-0.213	-0.235	-0.312	-0.482	-0.187	-0.218	-0.231	-0.317	-0.226	-0.261	-0.232	-0.211	-0.249	-0.187
calcium channel activity	-0.067	-0.211	-0.398	-0.265	-0.321	-0.055	-0.283	-0.221	3.434	-0.28	-0.473	-0.196	-0.222	-0.293	-0.214	-0.366	-0.308	-0.33	3.841	4.171	-0.187	-0.261	-0.288	-0.382	-0.59	-0.229	-0.267	-0.283	-0.388	-0.277	-0.32	-0.284	-0.259	-0.305	-0.229
calcium ion binding	-0.183	1.209	-0.101	3.564	7.474	-0.149	0.577	-0.7	0.3	-0.887	-0.777	-0.621	-0.705	-0.93	-0.679	-1.16	-0.977	-1.046	-0.791	-0.733	-0.592	0.415	0.218	-1.21	-0.67	-0.725	-0.846	-0.897	0.486	0.3	-1.014	-0.9	0.432	-0.968	-0.726
calcium ion homeostasis	-0.087	-0.272	-0.514	-0.343	4.576	-0.071	-0.365	-0.312	-0.391	-0.396	-0.668	-0.277	-0.314	-0.415	-0.303	-0.518	-0.436	-0.467	-0.353	-0.327	-0.264	-0.369	-0.408	-0.54	-0.834	-0.324	-0.377	-0.4	-0.549	-0.391	-0.452	-0.402	-0.366	-0.432	-0.324
calcium ion transport	-0.067	-0.211	-0.398	-0.265	-0.321	-0.055	-0.283	-0.285	-0.357	-0.361	-0.61	-0.253	-0.287	-0.379	-0.277	-0.473	-0.398	-0.426	-0.322	-0.299	-0.241	-0.337	-0.372	-0.493	-0.762	-0.295	-0.344	-0.365	-0.501	-0.357	-0.413	-0.367	-0.334	-0.394	-0.295
calcium ion transporter activity	-0.087	-0.272	-0.514	-0.343	-0.415	-0.071	-0.365	-0.221	-0.276	-0.28	-0.473	-0.196	-0.222	-0.293	-0.214	-0.366	-0.308	-0.33	-0.25	-0.231	-0.187	-0.261	-0.288	-0.382	-0.59	-0.229	-0.267	-0.283	-0.388	-0.277	-0.32	-0.284	-0.259	-0.305	-0.229
calcium ion-dependent exocytosis	-0.039	-0.122	-0.23	-0.153	-0.185	-0.032	-0.163	-0.127	-0.16	-0.161	-0.273	-0.113	-0.128	-0.169	-0.124	-0.211	-0.178	-0.19	-0.144	-0.134	-0.108	-0.151	-0.166	-0.22	-0.34	-0.132	-0.154	-0.163	-0.224	-0.16	-0.185	-0.164	-0.149	-0.176	-0.132
calcium\:cation antiporter activity	-0.039	-0.122	-0.23	-0.153	-0.185	-0.032	-0.163	-0.127	-0.16	-0.161	-0.273	-0.113	-0.128	-0.169	-0.124	-0.211	-0.178	-0.19	-0.144	-0.134	-0.108	-0.151	-0.166	-0.22	-0.34	-0.132	-0.154	-0.163	-0.224	-0.16	-0.185	-0.164	-0.149	-0.176	-0.132
calcium\:hydrogen antiporter activity	-0.039	-0.122	-0.23	-0.153	-0.185	-0.032	-0.163	-0.127	-0.16	-0.161	-0.273	-0.113	-0.128	-0.169	-0.124	-0.211	-0.178	-0.19	-0.144	-0.134	-0.108	-0.151	-0.166	-0.22	-0.34	-0.132	-0.154	-0.163	-0.224	-0.16	-0.185	-0.164	-0.149	-0.176	-0.132
calcium-dependent cell-cell adhesion	-0.087	-0.272	-0.514	-0.343	-0.415	-0.071	-0.365	-0.338	-0.423	-0.427	3.747	-0.299	-0.34	-0.448	-0.327	-0.559	-0.471	-0.504	-0.381	-0.353	-0.285	-0.399	-0.44	-0.583	-0.901	-0.35	-0.408	-0.432	-0.593	-0.423	-0.489	-0.434	-0.396	-0.467	-0.35
calcium-dependent protein serine/threonine phosphatase activity	-0.039	-0.122	-0.23	6.528	5.392	-0.032	6.126	-0.127	-0.16	-0.161	-0.273	-0.113	-0.128	-0.169	-0.124	-0.211	-0.178	-0.19	-0.144	-0.134	-0.108	-0.151	-0.166	-0.22	-0.34	-0.132	-0.154	-0.163	-0.224	-0.16	-0.185	-0.164	-0.149	-0.176	-0.132
calcium-dependent protein serine/threonine phosphatase regulator activity	-0.039	-0.122	-0.23	-0.153	-0.185	-0.032	-0.163	-0.127	-0.16	-0.161	-0.273	-0.113	-0.128	-0.169	-0.124	-0.211	-0.178	-0.19	-0.144	-0.134	-0.108	-0.151	-0.166	-0.22	-0.34	-0.132	-0.154	-0.163	-0.224	-0.16	-0.185	-0.164	-0.149	-0.176	-0.132
calcium-mediated signaling	-0.103	-0.322	-0.608	-0.406	-0.491	-0.084	-0.432	-0.338	-0.423	-0.427	-0.722	-0.299	-0.34	-0.448	-0.327	-0.559	-0.471	-0.504	-0.381	-0.353	-0.285	-0.399	-0.44	-0.583	0.338	-0.35	-0.408	-0.432	-0.593	-0.423	-0.489	-0.434	-0.396	-0.467	-0.35
calcium-transporting ATPase activity	-0.055	-0.172	-0.325	-0.217	-0.262	-0.045	-0.231	-0.18	-0.226	-0.228	-0.386	-0.16	-0.181	-0.239	-0.175	-0.299	-0.252	-0.269	-0.204	-0.189	-0.153	-0.213	-0.235	-0.312	-0.482	-0.187	-0.218	-0.231	-0.317	-0.226	-0.261	-0.232	-0.211	-0.249	-0.187
calmodulin binding	-0.123	2.253	0.724	-0.485	1.179	-0.101	1.474	-0.423	-0.53	-0.536	-0.906	-0.375	-0.426	-0.562	-0.411	-0.701	-0.591	-0.632	-0.478	1.857	-0.358	-0.5	-0.552	0.705	0.848	1.887	1.495	-0.542	0.671	-0.53	-0.613	-0.544	-0.496	1.18	-0.439
calmodulin regulated protein kinase activity	-0.055	-0.172	-0.325	-0.217	-0.262	-0.045	-0.231	-0.18	-0.226	-0.228	-0.386	-0.16	-0.181	-0.239	-0.175	-0.299	-0.252	-0.269	-0.204	-0.189	-0.153	-0.213	-0.235	-0.312	-0.482	-0.187	-0.218	-0.231	-0.317	-0.226	-0.261	-0.232	-0.211	-0.249	-0.187
calmodulin-dependent protein kinase I activity	-0.039	-0.122	-0.23	-0.153	-0.185	-0.032	-0.163	-0.127	-0.16	-0.161	-0.273	-0.113	-0.128	-0.169	-0.124	-0.211	-0.178	-0.19	-0.144	-0.134	-0.108	-0.151	-0.166	-0.22	-0.34	-0.132	-0.154	-0.163	-0.224	-0.16	-0.185	-0.164	-0.149	-0.176	-0.132
calpain activity	-0.039	-0.122	-0.23	-0.153	-0.185	-0.032	-0.163	-0.127	-0.16	-0.161	-0.273	-0.113	-0.128	-0.169	-0.124	-0.211	-0.178	-0.19	-0.144	-0.134	-0.108	-0.151	-0.166	-0.22	-0.34	-0.132	-0.154	-0.163	-0.224	-0.16	-0.185	-0.164	-0.149	-0.176	-0.132
cAMP biosynthesis								-0.127	-0.16	-0.161	-0.273	-0.113	-0.128	-0.169	-0.124	-0.211	-0.178	-0.19	-0.144	-0.134	-0.108	-0.151	-0.166	-0.22	-0.34	-0.132	-0.154	-0.163	4.463	-0.16	-0.185	-0.164	-0.149	-0.176	-0.132
cAMP catabolism	-0.039	-0.122	-0.23	-0.153	-0.185	-0.032	-0.163	-0.127	-0.16	-0.161	-0.273	-0.113	-0.128	-0.169	-0.124	-0.211	-0.178	-0.19	-0.144	-0.134	-0.108	-0.151	-0.166	-0.22	-0.34	-0.132	-0.154	-0.163	-0.224	-0.16	-0.185	-0.164	-0.149	-0.176	-0.132
cAMP metabolism	-0.039	-0.122	-0.23	-0.153	-0.185	-0.032	-0.163	-0.18	-0.226	-0.228	-0.386	-0.16	-0.181	-0.239	-0.175	-0.299	-0.252	-0.269	-0.204	-0.189	-0.153	-0.213	-0.235	-0.312	-0.482	-0.187	-0.218	-0.231	2.998	-0.226	-0.261	-0.232	-0.211	-0.249	-0.187
cAMP-dependent protein kinase activity	-0.067	-0.211	2.249	-0.265	-0.321	-0.055	-0.283	-0.221	-0.276	-0.28	-0.473	-0.196	-0.222	-0.293	-0.214	-0.366	-0.308	-0.33	-0.25	-0.231	-0.187	-0.261	-0.288	-0.382	-0.59	-0.229	-0.267	-0.283	-0.388	-0.277	-0.32	-0.284	-0.259	-0.305	-0.229
cAMP-dependent protein kinase complex	-0.078	3.925	4.125	-0.306	-0.371	-0.064	-0.327	-0.255	-0.319	-0.323	-0.546	-0.226	-0.257	-0.339	-0.247	-0.423	-0.356	-0.381	-0.288	-0.267	-0.216	-0.301	-0.333	-0.441	-0.681	-0.264	-0.308	-0.327	-0.448	-0.319	-0.369	-0.328	-0.299	-0.353	-0.264
cAMP-dependent protein kinase inhibitor activity	-0.039	8.213	4.353	-0.153	-0.185	-0.032	-0.163	-0.127	-0.16	-0.161	-0.273	-0.113	-0.128	-0.169	-0.124	-0.211	-0.178	-0.19	-0.144	-0.134	-0.108	-0.151	-0.166	-0.22	-0.34	-0.132	-0.154	-0.163	-0.224	-0.16	-0.185	-0.164	-0.149	-0.176	-0.132
cAMP-dependent protein kinase regulator activity	-0.039	8.213	4.353	-0.153	-0.185	-0.032	-0.163	-0.127	-0.16	-0.161	-0.273	-0.113	-0.128	-0.169	-0.124	-0.211	-0.178	-0.19	-0.144	-0.134	-0.108	-0.151	-0.166	-0.22	-0.34	-0.132	-0.154	-0.163	-0.224	-0.16	-0.185	-0.164	-0.149	-0.176	-0.132
cAMP-mediated signaling	-0.095	3.106	-0.563	-0.375	-0.455	-0.078	2.169	-0.361	-0.452	-0.457	2.015	-0.32	-0.363	1.67	-0.35	1.152	1.548	1.386	-0.408	-0.378	-0.305	1.974	1.716	1.06	0.196	-0.374	-0.436	-0.462	2.683	-0.452	-0.522	1.752	-0.423	1.57	2.351
cAMP-specific phosphodiesterase activity	-0.055	5.722	-0.325	-0.217	-0.262	-0.045	4.217	-0.18	-0.226	-0.228	-0.386	-0.16	-0.181	-0.239	-0.175	-0.299	-0.252	-0.269	-0.204	-0.189	-0.153	-0.213	-0.235	-0.312	-0.482	-0.187	-0.218	-0.231	-0.317	-0.226	-0.261	-0.232	-0.211	-0.249	-0.187
carbamoyl-phosphate synthase (glutamine-hydrolyzing) activity	-0.055	-0.172	-0.325	-0.217	-0.262	-0.045	-0.231	-0.18	-0.226	-0.228	-0.386	-0.16	-0.181	-0.239	-0.175	-0.299	-0.252	-0.269	-0.204	-0.189	-0.153	-0.213	-0.235	-0.312	1.836	-0.187	-0.218	4.215	-0.317	-0.226	-0.261	-0.232	-0.211	-0.249	-0.187
carbamoyl-phosphate synthase activity	-0.067	-0.211	-0.398	-0.265	-0.321	-0.055	-0.283	-0.221	-0.276	-0.28	-0.473	-0.196	-0.222	-0.293	-0.214	-0.366	-0.308	-0.33	-0.25	-0.231	-0.187	-0.261	-0.288	-0.382	3.196	-0.229	-0.267	3.347	-0.388	-0.277	-0.32	-0.284	-0.259	-0.305	-0.229
carbohydrate binding	-0.103	-0.322	-0.608	-0.406	1.619	-0.084	-0.432	-0.404	-0.505	-0.511	-0.863	-0.358	-0.406	-0.536	-0.391	-0.669	-0.563	-0.603	-0.456	-0.423	-0.341	-0.477	-0.526	-0.697	-1.078	-0.418	-0.487	-0.517	-0.709	-0.505	-0.584	-0.519	-0.473	-0.558	-0.418
carbohydrate biosynthesis	-0.274	1.538	-1.618	0.842	0.297	-0.224	-1.15	2.045	1.198	5.216	0.355	0.249	0.012	4.868	3.216	0.222	2.295	3.357	1.605	-0.067	0.361	-1.193	-1.317	-1.137	1.072	-0.062	-1.219	0.313	1.818	-1.264	-1.461	-0.481	-0.293	0.122	0.946
carbohydrate catabolism	-0.274	0.34	-0.959	0.842	-1.306	-0.224	-0.246	4.033	2.797	3.543	-0.181	4.827	0.012	4.038	4.215	-1.06	3.724	3.996	2.517	-0.067	4.128	-1.203	-1.328	0.05	2.266	3.875	2.141	0.289	8.31	1.168	0.657	1.132	3.231	5.394	-1.011
carbohydrate kinase activity	-0.156	-0.488	1.375	1.06	-0.743	-0.127	0.921	5.103	2.356	2.315	-1.159	3.75	-0.545	3.584	3.351	0.27	1.982	4.329	4.405	-0.567	3.971	-0.64	-0.707	-0.936	-1.447	-0.561	-0.654	-0.694	-0.952	-0.678	-0.784	-0.697	-0.635	-0.749	-0.561
carbohydrate metabolism	-0.598	1.001	-1.004	-0.052	0.609	-0.488	-1.208	5.945	5.066	5.353	-0.053	3.232	0.891	5.637	4.694	-0.386	5.843	7.844	2.559	0.207	3.014	-0.361	-1.203	-0.956	2.836	2.202	0.382	1.657	5.167	-0.217	0.12	1.657	3.169	3.02	0.283
carbohydrate phosphatase activity	-0.095	-0.298	1.309	-0.375	-0.455	-0.078	-0.4	-0.312	2.233	-0.396	0.94	-0.277	-0.314	-0.415	-0.303	-0.518	-0.436	1.756	-0.353	-0.327	-0.264	-0.369	-0.408	-0.54	0.504	-0.324	-0.377	-0.4	1.365	-0.391	-0.452	-0.402	-0.366	-0.432	-0.324
carbohydrate transport	-0.199	1.017	-1.175	-0.784	-0.949	-0.162	-0.835	8.168	6.228	6.137	0.822	3.611	0.469	3.821	3.183	-0.529	5.408	4.927	4.789	2.838	3.847	-0.944	-0.049	-1.381	1.026	-0.828	-0.965	-0.013	0.856	0.032	-0.256	-1.028	-0.937	-0.165	-0.828
carbohydrate transporter activity	-0.207	0.934	-1.22	-0.813	-0.985	-0.169	-0.867	7.111	5.385	5.305	0.934	3.744	0.524	3.978	3.309	-0.474	4.654	4.223	3.795	2.958	3.984	-0.92	0.004	-1.345	1.707	-0.806	-0.94	1.077	0.952	0.086	-0.202	-1.001	-0.912	-0.111	-0.806
carbon utilization	-0.039	-0.122	-0.23	-0.153	-0.185	-0.032	-0.163	3.731	2.894	-0.323	-0.546	4.255	3.705	2.7	-0.247	-0.423	2.544	2.34	-0.288	-0.267	-0.216	-0.301	-0.333	-0.441	0.958	-0.264	-0.308	2.817	-0.448	-0.319	-0.369	-0.328	-0.299	-0.353	-0.264
carbon utilization by fixation of carbon dioxide								-0.127	-0.16	-0.161	-0.273	-0.113	-0.128	-0.169	-0.124	-0.211	-0.178	-0.19	-0.144	-0.134	-0.108	-0.151	-0.166	-0.22	-0.34	-0.132	-0.154	-0.163	-0.224	-0.16	-0.185	-0.164	-0.149	-0.176	-0.132
carbon utilization by utilization of organic compounds	-0.055	-0.172	-0.325	-0.217	-0.262	-0.045	-0.231	-0.127	-0.16	-0.161	-0.273	-0.113	-0.128	-0.169	-0.124	-0.211	-0.178	-0.19	-0.144	-0.134	-0.108	-0.151	-0.166	-0.22	-0.34	-0.132	-0.154	-0.163	-0.224	-0.16	-0.185	-0.164	-0.149	-0.176	-0.132
carbonate dehydratase activity								7.843	6.266	-0.161	-0.273	8.846	7.793	5.906	-0.124	-0.211	5.621	5.251	-0.144	-0.134	-0.108	-0.151	-0.166	-0.22	2.937	-0.132	-0.154	6.123	-0.224	-0.16	-0.185	-0.164	-0.149	-0.176	-0.132
carbon-carbon lyase activity	-0.187	-0.586	-0.147	0.66	0.274	-0.153	0.53	0.69	0.234	0.211	1.246	0.947	0.71	0.117	0.754	-0.322	-1.009	-0.116	0.439	0.594	1.087	-0.855	-0.943	2.125	2.717	0.617	1.484	-0.927	2.884	0.233	0.94	1.291	0.365	1.123	-0.738
carbon-nitrogen ligase activity\, with glutamine as amido-N-donor	-0.117	-0.366	-0.69	1.769	-0.557	-0.095	-0.49	-0.423	-0.53	-0.536	-0.906	-0.375	-0.426	-0.562	-0.411	-0.701	-0.591	-0.632	-0.478	-0.443	-0.358	-0.5	-0.552	-0.731	0.848	-0.438	-0.511	1.355	-0.744	-0.53	-0.613	-0.544	-0.496	-0.585	-0.439
carbon-nitrogen lyase activity	-0.078	-0.244	-0.46	-0.306	-0.371	-0.064	-0.327	-0.285	-0.357	-0.361	1.152	-0.253	-0.287	-0.379	-0.277	1.74	-0.398	-0.426	-0.322	3.112	-0.241	-0.337	-0.372	-0.493	-0.762	-0.295	-0.344	-0.365	-0.501	-0.357	-0.413	-0.367	-0.334	-0.394	-0.295
carbon-oxygen lyase activity	-0.067	-0.211	-0.398	-0.265	-0.321	-0.055	-0.283	0.456	0.007	-1.025	-1.106	0.704	1.7	-0.111	-0.785	-0.556	0.711	1.382	-0.915	0.362	-0.676	-0.957	-1.056	0.112	-0.081	0.385	0.078	0.959	0.066	0.006	-0.282	-0.047	0.137	0.737	-0.828
carbon-oxygen lyase activity\, acting on phosphates	-0.207	0.934	1.387	0.454	0.073	-0.169	0.326	-0.221	-0.276	-0.28	-0.473	-0.196	-0.222	-0.293	-0.214	-0.366	-0.308	-0.33	-0.25	-0.231	-0.187	-0.261	-0.288	-0.382	-0.59	-0.229	-0.267	-0.283	-0.388	-0.277	-0.32	-0.284	-0.259	-0.305	-0.229
carbon-sulfur lyase activity	-0.11	2.605	0.971	1.931	1.449	-0.09	-0.462	-0.383	-0.479	-0.485	0.495	-0.339	2.257	-0.508	-0.371	1.015	-0.534	-0.572	-0.433	-0.401	-0.324	-0.452	-0.499	4.101	3.351	2.174	-0.462	-0.49	4.018	-0.479	-0.554	1.597	1.833	3.373	2.173
carboxyl- and carbamoyltransferase activity	-0.055	-0.172	-0.325	-0.217	-0.262	-0.045	-0.231	-0.18	-0.226	-0.228	-0.386	-0.16	-0.181	-0.239	-0.175	-0.299	-0.252	-0.269	-0.204	-0.189	-0.153	-0.213	-0.235	-0.312	4.154	-0.187	-0.218	-0.231	-0.317	-0.226	-0.261	-0.232	-0.211	-0.249	-0.187
carboxylesterase activity	-0.078	-0.244	-0.46	-0.306	-0.371	-0.064	-0.327	-0.255	-0.319	-0.323	-0.546	-0.226	-0.257	-0.339	-0.247	-0.423	-0.356	-0.381	-0.288	-0.267	-0.216	-0.301	-0.333	-0.441	-0.681	-0.264	-0.308	-0.327	1.896	-0.319	-0.369	-0.328	3.122	-0.353	-0.264
carboxylic acid biosynthesis	-0.156	1.6	2.523	-0.614	-0.743	-0.127	-0.654	-0.613	-0.767	0.552	4.45	-0.543	-0.603	-0.814	-0.594	0.018	-0.855	-0.915	-0.677	-0.627	-0.507	-0.724	-0.799	-1.059	-0.951	0.975	-0.74	-0.785	0.882	-0.767	-0.887	-0.771	-0.702	0.421	-0.621
carboxylic acid catabolism	-0.039	-0.122	-0.23	-0.153	-0.185	-0.032	-0.163	-0.127	-0.16	-0.161	-0.273	-0.113	-0.128	-0.169	-0.124	-0.211	-0.178	-0.19	-0.144	-0.134	-0.108	-0.151	-0.166	-0.22	-0.34	-0.132	-0.154	-0.163	-0.224	-0.16	-0.185	-0.164	-0.149	-0.176	-0.132
carboxylic acid metabolism	0.968	-1.01	-0.416	1.207	-1.732	-0.538	-0.778	-0.161	0.971	-0.183	1.29	-0.115	0.712	-0.115	-0.021	-0.087	-0.091	0.698	0.884	2.219	2.736	-0.168	-1.749	3.087	4.292	1.852	-0.66	2.234	5.288	-2.293	-1.275	1.861	1.045	6.259	3.601
carboxylic acid transport	-0.262	1.677	-0.863	0.97	-0.415	-0.214	-0.158	-0.933	-1.168	-1.181	-0.908	-0.827	-0.939	-1.239	-0.905	-0.18	-1.302	-0.642	-1.054	1.128	-0.789	1.708	0.489	4.301	3.843	6.479	4.38	4.88	5.478	1.493	0.197	3.988	3.628	6.784	0.097
carboxylic acid transporter activity	-0.274	0.34	-0.959	1.802	-0.504	-0.224	-0.246	-0.887	-1.111	-1.124	-0.756	-0.787	-0.893	-1.178	-0.861	-0.753	-1.238	-1.325	-1.003	2.387	-0.75	1.903	0.635	5.367	4.759	6.901	4.712	5.243	5.916	1.684	0.341	4.307	3.919	7.253	0.197
carboxylic ester hydrolase activity	-0.214	-0.669	-1.263	-0.842	-1.02	-0.175	-0.897	-0.7	-0.877	-0.887	-0.056	-0.621	0.745	-0.93	-0.679	-1.16	-0.977	-1.046	-0.791	-0.733	-0.592	-0.828	-0.913	-1.21	-0.67	0.685	0.372	1.405	1.344	-0.877	-1.014	2.539	2.936	1.173	0.685
carboxy-lyase activity	-0.146	-0.456	-0.861	-0.574	0.798	-0.119	1.072	1.214	0.724	0.7	1.425	1.5	1.2	0.602	1.285	0.161	-0.797	0.366	0.941	1.11	1.618	-0.675	-0.745	0.079	0.677	-0.592	0.799	-0.732	3.196	-0.715	0.428	0.668	-0.67	1.831	-0.592
carboxymethylenebutenolidase activity	-0.039	-0.122	-0.23	-0.153	-0.185	-0.032	-0.163	-0.127	-0.16	-0.161	-0.273	-0.113	-0.128	-0.169	-0.124	-0.211	-0.178	-0.19	-0.144	-0.134	-0.108	-0.151	-0.166	-0.22	-0.34	-0.132	-0.154	-0.163	-0.224	-0.16	-0.185	-0.164	-0.149	-0.176	-0.132
carboxypeptidase A activity	-0.039	-0.122	-0.23	-0.153	-0.185	-0.032	-0.163	-0.127	-0.16	-0.161	-0.273	-0.113	-0.128	-0.169	-0.124	-0.211	-0.178	-0.19	-0.144	-0.134	-0.108	-0.151	-0.166	-0.22	-0.34	-0.132	-0.154	-0.163	-0.224	-0.16	-0.185	-0.164	-0.149	-0.176	-0.132
carboxypeptidase activity	-0.095	-0.298	-0.563	-0.375	-0.455	-0.078	-0.4	2.943	2.233	2.2	-0.668	3.382	-0.314	2.067	3.051	-0.518	1.933	1.756	2.54	2.786	3.567	-0.369	-0.408	-0.54	-0.834	-0.324	-0.377	-0.4	1.365	-0.391	-0.452	2.156	2.428	-0.432	-0.324
carboxypeptidase C activity	-0.039	-0.122	-0.23	-0.153	-0.185	-0.032	-0.163	-0.127	-0.16	-0.161	-0.273	-0.113	-0.128	-0.169	-0.124	-0.211	-0.178	-0.19	-0.144	-0.134	-0.108	-0.151	-0.166	-0.22	-0.34	-0.132	-0.154	-0.163	4.463	-0.16	-0.185	-0.164	-0.149	-0.176	-0.132
carboxypeptidase D activity	-0.039	-0.122	-0.23	-0.153	-0.185	-0.032	-0.163	-0.127	-0.16	-0.161	-0.273	-0.113	-0.128	-0.169	-0.124	-0.211	-0.178	-0.19	-0.144	-0.134	-0.108	-0.151	-0.166	-0.22	-0.34	-0.132	-0.154	-0.163	-0.224	-0.16	-0.185	-0.164	-0.149	-0.176	-0.132
cardiolipin synthase activity	-0.039	-0.122	-0.23	-0.153	-0.185	-0.032	-0.163	-0.127	-0.16	-0.161	-0.273	-0.113	-0.128	-0.169	-0.124	-0.211	-0.178	-0.19	-0.144	-0.134	-0.108	-0.151	-0.166	-0.22	-0.34	-0.132	-0.154	-0.163	-0.224	-0.16	-0.185	-0.164	-0.149	-0.176	-0.132
carnitine metabolism	-0.067	-0.211	-0.398	-0.265	-0.321	-0.055	-0.283	-0.221	-0.276	-0.28	-0.473	-0.196	-0.222	-0.293	-0.214	-0.366	-0.308	-0.33	-0.25	-0.231	-0.187	-0.261	-0.288	-0.382	1.303	4.221	3.572	6.977	-0.388	-0.277	-0.32	-0.284	-0.259	-0.305	4.219
carnitine O-acetyltransferase activity	-0.067	-0.211	-0.398	-0.265	-0.321	-0.055	-0.283	-0.221	-0.276	-0.28	-0.473	-0.196	-0.222	-0.293	-0.214	-0.366	-0.308	-0.33	-0.25	-0.231	-0.187	-0.261	-0.288	-0.382	1.303	4.221	3.572	6.977	-0.388	-0.277	-0.32	-0.284	-0.259	-0.305	4.219
carnitine O-acyltransferase activity	-0.067	-0.211	-0.398	-0.265	-0.321	-0.055	-0.283	-0.221	-0.276	-0.28	-0.473	-0.196	-0.222	-0.293	-0.214	-0.366	-0.308	-0.33	-0.25	-0.231	-0.187	-0.261	-0.288	-0.382	1.303	4.221	3.572	6.977	-0.388	-0.277	-0.32	-0.284	-0.259	-0.305	4.219
carnitine transport								-0.127	-0.16	-0.161	-0.273	-0.113	-0.128	-0.169	-0.124	-0.211	-0.178	-0.19	-0.144	-0.134	-0.108	-0.151	-0.166	-0.22	-0.34	-0.132	-0.154	-0.163	-0.224	-0.16	-0.185	-0.164	-0.149	-0.176	-0.132
carnitine transporter activity								-0.127	-0.16	-0.161	-0.273	-0.113	-0.128	-0.169	-0.124	-0.211	-0.178	-0.19	-0.144	-0.134	-0.108	-0.151	-0.166	-0.22	-0.34	-0.132	-0.154	-0.163	-0.224	-0.16	-0.185	-0.164	-0.149	-0.176	-0.132
carnitine\:acyl carnitine antiporter activity	-0.039	-0.122	-0.23	-0.153	-0.185	-0.032	-0.163	-0.127	-0.16	-0.161	-0.273	-0.113	-0.128	-0.169	-0.124	-0.211	-0.178	-0.19	-0.144	-0.134	-0.108	-0.151	-0.166	-0.22	-0.34	-0.132	-0.154	-0.163	-0.224	-0.16	-0.185	-0.164	-0.149	-0.176	-0.132
carotenoid biosynthesis								-0.127	-0.16	-0.161	-0.273	-0.113	-0.128	-0.169	-0.124	-0.211	-0.178	-0.19	-0.144	-0.134	-0.108	-0.151	-0.166	-0.22	-0.34	-0.132	-0.154	-0.163	-0.224	-0.16	-0.185	-0.164	-0.149	-0.176	-0.132
carotenoid metabolism								-0.127	-0.16	-0.161	-0.273	-0.113	-0.128	-0.169	-0.124	-0.211	-0.178	-0.19	-0.144	-0.134	-0.108	-0.151	-0.166	-0.22	-0.34	-0.132	-0.154	-0.163	-0.224	-0.16	-0.185	-0.164	-0.149	-0.176	-0.132
carrier activity	-0.486	-0.133	-1.342	3.648	0.006	-0.396	2.674	2.774	2.347	1.352	-1.076	1.611	-0.7	1.077	1.188	-1.608	2.47	3.158	0.488	0.834	1.16	-0.696	-1.498	3.022	4.103	2.555	1.629	4.011	4.568	0.49	-1.034	3.073	2.3	5.495	0.327
casein kinase activity	-0.095	-0.298	-0.563	-0.375	-0.455	-0.078	-0.4	-0.312	-0.391	-0.396	4.158	-0.277	-0.314	-0.415	-0.303	-0.518	-0.436	-0.467	-0.353	-0.327	-0.264	-0.369	-0.408	-0.54	-0.834	-0.324	-0.377	-0.4	-0.549	-0.391	-0.452	-0.402	-0.366	-0.432	-0.324
casein kinase I activity	-0.055	-0.172	-0.325	-0.217	-0.262	-0.045	-0.231	-0.18	-0.226	-0.228	-0.386	-0.16	-0.181	-0.239	-0.175	-0.299	-0.252	-0.269	-0.204	-0.189	-0.153	-0.213	-0.235	-0.312	-0.482	-0.187	-0.218	-0.231	-0.317	-0.226	-0.261	-0.232	-0.211	-0.249	-0.187
caspase activity	-0.039	-0.122	-0.23	-0.153	-0.185	-0.032	-0.163	-0.127	-0.16	-0.161	-0.273	-0.113	-0.128	-0.169	-0.124	-0.211	-0.178	-0.19	-0.144	-0.134	-0.108	-0.151	-0.166	-0.22	-0.34	-0.132	-0.154	-0.163	-0.224	-0.16	-0.185	-0.164	-0.149	-0.176	-0.132
catabolism	1.051	-1.439	0.456	0.565	-0.467	-0.518	-0.602	1.101	1.227	-0.271	-1.73	1.328	-0.246	0.469	0.825	-0.754	1.103	2.097	1.196	-0.429	1.625	-2.139	-2.506	-1.847	1.672	0.904	-0.737	-0.687	4.047	-1.277	-1.361	-0.342	0.575	3.155	-1.222
catalase activity	-0.055	-0.172	-0.325	-0.217	-0.262	-0.045	-0.231	-0.18	4.318	4.266	-0.386	6.176	-0.181	4.057	5.631	-0.299	7.95	3.578	4.806	5.202	-0.153	-0.213	-0.235	-0.312	-0.482	-0.187	-0.218	-0.231	2.998	-0.226	-0.261	-0.232	-0.211	3.887	-0.187
catalytic activity	-0.135	1.136	0.662	2.488	-0.832	0.584	1.028	0.552	0.546	-1.105	0.936	0.793	0.02	1.383	0.999	-0.18	1.23	1.227	-0.018	1.403	1.433	-2.854	-3.35	2.116	4.564	-0.174	-0.509	2.81	1.955	-2.192	-1.428	-0.106	1.155	1.6	0.492
cation binding	-0.613	0.318	1.301	2.087	3.07	-0.502	-0.455	1.702	0.784	1.103	-3.02	1.339	0.226	0.796	0.881	-1.83	0.833	0.376	1.415	0.028	0.442	1.552	0.912	2.023	2.548	0.079	1.004	2.567	0.723	1.177	0.93	0.62	1.607	0.202	0.085
cation channel activity	-0.078	-0.244	-0.46	-0.306	-0.371	-0.064	-0.327	-0.255	2.894	-0.323	-0.546	-0.226	-0.257	-0.339	-0.247	-0.423	-0.356	-0.381	3.255	3.546	-0.216	-0.301	-0.333	-0.441	-0.681	-0.264	-0.308	-0.327	-0.448	-0.319	-0.369	-0.328	-0.299	-0.353	-0.264
cation homeostasis	-0.321	0.007	1.453	8.613	3.233	-0.264	9.501	-1.134	0.046	-0.711	-0.63	-1.006	-0.238	-1.506	-1.1	-1.315	-0.921	-1.694	-0.474	-0.318	-0.959	0.207	-0.07	-0.332	1.457	-1.175	-1.37	-1.453	-1.459	0.778	0.915	-1.459	0.231	-0.901	-1.175
cation transport	-0.4	-0.42	0.84	5.094	0.32	-0.327	6.484	1.327	1.541	2.603	-0.743	1.843	2.696	1.243	4.35	0.593	2.019	2.1	0.821	2.478	3.706	1.836	0.789	1.631	2.972	-0.178	1.138	1.424	3.177	5.504	5.755	2.509	4.893	2.589	1.179
cation transporter activity	-0.414	-0.489	1.545	4.83	0.724	-0.338	6.778	2.067	2.151	2.086	-1.05	1.877	1.332	1.282	2.947	-0.243	3.095	3.599	0.224	1.843	2.92	0.671	-0.273	1.683	3.637	-0.156	0.584	2.58	2.824	2.151	2.845	2	3.742	3.159	0.527
cation\:cation antiporter activity	-0.087	-0.272	-0.514	-0.343	2.081	-0.071	-0.365	-0.285	-0.357	-0.361	-0.61	-0.253	-0.287	-0.379	-0.277	-0.473	-0.398	-0.426	-0.322	-0.299	-0.241	-0.337	-0.372	-0.493	-0.762	-0.295	-0.344	-0.365	-0.501	-0.357	-0.413	-0.367	-0.334	-0.394	-0.295
cation\:sugar symporter activity	-0.039	-0.122	-0.23	-0.153	-0.185	-0.032	-0.163	7.843	6.266	6.194	-0.273	-0.113	-0.128	-0.169	-0.124	-0.211	5.621	5.251	6.94	-0.134	-0.108	-0.151	-0.166	-0.22	-0.34	-0.132	-0.154	-0.163	-0.224	-0.16	-0.185	-0.164	-0.149	-0.176	-0.132
cation-transporting ATPase activity	-0.191	-0.598	1.686	10.19	-0.911	-0.156	9.499	-0.7	-0.877	-0.887	-1.498	-0.621	-0.705	-0.93	-0.679	-1.16	-0.977	-1.046	-0.791	-0.733	-0.592	0.415	-0.913	-0.339	-0.67	-0.725	0.372	0.254	0.486	0.3	0.012	0.246	0.432	0.103	0.685
CCAAT-binding factor complex	-0.078	-0.244	-0.46	-0.306	-0.371	-0.064	-0.327	-0.255	-0.319	-0.323	-0.546	-0.226	-0.257	-0.339	3.859	-0.423	-0.356	-0.381	-0.288	-0.267	-0.216	-0.301	-0.333	-0.441	-0.681	-0.264	-0.308	-0.327	-0.448	-0.319	-0.369	-0.328	-0.299	-0.353	-0.264
CCR4-NOT complex	-0.123	-0.385	3.625	5.861	1.179	-0.101	3.466	-0.442	-0.553	-0.56	-0.946	-0.392	-0.445	-0.587	-0.429	-0.733	-0.617	-0.66	-0.5	-0.463	-0.374	-0.523	-0.577	-0.764	-0.233	-0.458	-0.534	-0.566	-0.777	-0.554	-0.64	-0.569	-0.518	-0.611	-0.458
CCR4-NOT core complex	-0.087	-0.272	5.638	8.626	2.081	-0.071	5.263	-0.338	-0.423	-0.427	-0.722	-0.299	-0.34	-0.448	-0.327	-0.559	-0.471	-0.504	-0.381	-0.353	-0.285	-0.399	-0.44	-0.583	-0.901	-0.35	-0.408	-0.432	-0.593	-0.423	-0.489	-0.434	-0.396	-0.467	-0.35
Cdc73/Paf1 complex	-0.078	-0.244	1.833	-0.306	-0.371	-0.064	-0.327	-0.285	-0.357	-0.361	1.152	-0.253	-0.287	-0.379	-0.277	-0.473	-0.398	-0.426	-0.322	-0.299	-0.241	-0.337	-0.372	-0.493	-0.762	-0.295	-0.344	-0.365	-0.501	-0.357	-0.413	-0.367	-0.334	-0.394	-0.295
CDP-alcohol phosphatidyltransferase activity	-0.055	-0.172	-0.325	-0.217	-0.262	-0.045	-0.231	-0.285	-0.357	2.482	1.152	-0.253	-0.287	-0.379	-0.277	-0.473	-0.398	-0.426	-0.322	-0.299	-0.241	-0.337	-0.372	-0.493	-0.762	-0.295	-0.344	-0.365	-0.501	-0.357	-0.413	-0.367	-0.334	-0.394	-0.295
CDP-choline pathway	-0.039	-0.122	-0.23	-0.153	-0.185	-0.032	-0.163	-0.127	-0.16	-0.161	-0.273	-0.113	-0.128	-0.169	-0.124	-0.211	-0.178	-0.19	-0.144	-0.134	-0.108	-0.151	-0.166	-0.22	-0.34	-0.132	-0.154	-0.163	-0.224	-0.16	-0.185	-0.164	-0.149	-0.176	-0.132
CDP-diacylglycerol-glycerol-3-phosphate 3-phosphatidyltransferase activity								-0.127	-0.16	-0.161	-0.273	-0.113	-0.128	-0.169	-0.124	-0.211	-0.178	-0.19	-0.144	-0.134	-0.108	-0.151	-0.166	-0.22	-0.34	-0.132	-0.154	-0.163	-0.224	-0.16	-0.185	-0.164	-0.149	-0.176	-0.132
CDP-diacylglycerol-inositol 3-phosphatidyltransferase activity								-0.127	-0.16	-0.161	-0.273	-0.113	-0.128	-0.169	-0.124	-0.211	-0.178	-0.19	-0.144	-0.134	-0.108	-0.151	-0.166	-0.22	-0.34	-0.132	-0.154	-0.163	-0.224	-0.16	-0.185	-0.164	-0.149	-0.176	-0.132
CDP-diacylglycerol-serine O-phosphatidyltransferase activity								-0.127	-0.16	6.194	3.666	-0.113	-0.128	-0.169	-0.124	-0.211	-0.178	-0.19	-0.144	-0.134	-0.108	-0.151	-0.166	-0.22	-0.34	-0.132	-0.154	-0.163	-0.224	-0.16	-0.185	-0.164	-0.149	-0.176	-0.132
cell	-0.055	-0.172	-0.325	-0.217	-0.262	-0.045	-0.231	-5.151	-4.506	-3.677	-0.526	-2.867	-2.439	-5.611	-3.614	-1.227	-5.044	-3.979	-2.813	-2.583	-2.677	-0.542	0.061	-1.922	-7.444	-0.075	0.706	-1.457	-2.545	-0.19	-0.869	-0.035	-0.603	-0.575	-1.368
cell adhesion	-0.156	-0.488	0.227	-0.614	-0.743	-0.127	-0.654	1.214	0.724	-0.723	1.425	1.5	-0.575	0.602	-0.554	-0.946	0.502	1.584	0.941	1.11	1.618	-0.675	-0.745	-0.987	0.677	-0.592	-0.69	0.677	0.046	-0.715	-0.827	-0.735	0.863	1.831	-0.592
cell adhesion molecule binding	-0.179	-0.559	-0.053	0.758	-0.852	-0.146	-0.75	-0.221	-0.276	-0.28	-0.473	-0.196	-0.222	-0.293	-0.214	-0.366	-0.308	-0.33	-0.25	-0.231	-0.187	-0.261	-0.288	-0.382	1.303	-0.229	-0.267	-0.283	-0.388	-0.277	-0.32	-0.284	-0.259	-0.305	-0.229
cell aging	-0.268	1.606	2.45	5.805	6.086	-0.219	1.643	0.759	0.3	-0.887	-0.056	1.019	-0.705	1.295	0.824	-1.16	1.146	0.946	-0.791	-0.733	-0.592	-0.828	-0.913	-1.21	0.53	-0.725	-0.846	-0.897	0.486	0.3	-1.014	0.246	0.432	-0.968	-0.726
cell budding	1.377	2.649	2.594	2.341	-0.521	-0.446	1.467	-1.119	-1.401	-1.418	-1.485	-0.993	-1.127	-1.487	-1.086	-1.283	-1.562	-1.672	-1.265	-1.172	-0.947	0.245	-0.032	-0.835	-1.475	-1.159	-0.584	-1.434	-1.426	0.825	-0.326	0.008	0.268	-1.548	-0.27
cell communication	-0.331	-0.037	0.791	3.498	5.77	-0.27	1.625	0.076	0.429	-0.889	-0.958	-0.615	0.572	-1.088	-0.882	-1.074	-0.533	-0.156	-0.888	0.392	0.142	-0.157	-1.012	-1.932	-2.384	-1.59	-1.131	-1.351	-0.778	-0.418	-1.824	-0.54	0.783	-0.101	-0.068
cell cortex	-0.095	-0.298	1.309	-0.375	-0.455	-0.078	-0.4	-0.45	-0.928	-0.953	-1.097	-0.206	-1.275	-1.06	-0.388	-1.086	-1.174	-1.335	-0.706	-0.546	-0.111	-1.498	-1.653	-1.702	-2.376	-1.312	-1.53	-0.979	-0.786	-0.928	-1.26	-0.988	-0.083	-1.153	-0.524
cell cycle	-0.11	-0.345	0.971	-0.434	-0.525	-0.09	-0.462	-0.522	-1.695	-1.757	-1.305	-2.534	-1.716	-2.015	-1.97	-1.837	-2.288	-2.409	-1.154	-1.876	-1.501	-1.389	-1.615	-0.987	-2.349	0.05	0.12	-1.512	-2.504	-1.068	-1.4	1.219	-0.677	-0.809	-0.704
cell cycle arrest	-0.228	0.722	0.233	0.254	-0.125	-0.186	1.211	-0.383	-0.479	1.635	1.809	-0.339	-0.385	-0.508	-0.371	-0.634	-0.534	-0.572	-0.433	-0.401	-0.324	-0.452	-0.499	-0.661	1.165	-0.396	-0.462	-0.49	-0.673	-0.479	-0.554	-0.492	-0.449	-0.529	-0.397
cell cycle arrest in response to pheromone	4.039	1.424	1.56	-0.655	0.145	-0.56	-0.182	-0.312	-0.391	2.2	2.549	-0.277	-0.314	-0.415	-0.303	-0.518	-0.436	-0.467	-0.353	-0.327	-0.264	-0.369	-0.408	-0.54	0.504	-0.324	-0.377	-0.4	-0.549	-0.391	-0.452	-0.402	-0.366	-0.432	-0.324
cell cycle checkpoint	-0.207	-0.647	0.518	0.454	-0.985	-0.169	-0.867	-0.849	-1.063	-0.113	-0.028	-0.753	-0.855	-0.208	0.419	-0.658	-1.185	-0.445	0.113	-0.889	-0.718	-1.004	-1.108	-0.747	-0.779	-0.879	-1.026	-1.088	-1.492	-1.063	-1.229	-0.144	0.04	-1.174	-0.88
cell death	-0.392	-1.227	-1.382	-0.863	-1.301	-0.32	-1.004	0.43	0.989	-1.038	0.099	0.678	-0.825	1.769	0.492	-1.358	1.584	1.335	-0.926	-0.858	-0.693	-0.969	-1.069	-1.416	0.381	-0.849	-0.99	-1.05	0.03	-0.019	-1.186	-0.072	0.112	-1.133	-0.849
cell differentiation	-0.44	1.664	3.673	3.143	4.008	-0.359	0.449	0.904	0.729	0.682	-1.433	0.489	0.881	1.069	0.233	-1.329	1.948	1.575	0.473	0.015	0.625	-1.619	-1.199	-1.915	0.393	-0.686	-1.022	-0.559	-1.07	-0.493	-0.917	-1.762	-0.955	-1.338	-0.687
cell division	-0.078	-0.244	-0.46	-0.306	-0.371	-0.064	2.819	-1.251	-2.289	-2.315	-0.203	-1.621	-1.266	-2.428	-1.773	-1.238	-2.551	-2.731	-2.066	-1.915	-1.546	1.771	0.748	-1.091	-2.508	1.455	1.644	-0.521	-1.515	1.433	1.006	2.185	0.334	0.014	0.895
cell envelope	-0.349	0.801	0.021	0.143	1.504	-0.285	1.394	-0.255	-0.319	-0.323	-0.546	-0.226	-0.257	-0.339	-0.247	-0.423	-0.356	-0.381	-0.288	-0.267	-0.216	-0.301	-0.333	-0.441	-0.681	-0.264	-0.308	-0.327	-0.448	-0.319	-0.369	-0.328	-0.299	-0.353	-0.264
cell fraction	-0.078	-0.244	-0.46	-0.306	-0.371	-0.064	-0.327	0.252	-0.385	0.835	-1.27	-0.287	-0.547	0.044	-1.28	-1.211	0.445	1.247	0.604	-0.63	0.747	-1.56	-1.721	0.534	1.645	-0.607	-0.938	0.788	-0.009	-1.652	-1.357	-0.462	1.15	-0.095	-0.598
cell growth	-0.367	-0.257	0.785	8.694	3.051	-0.301	8.687	-0.285	-0.357	-0.361	-0.61	-0.253	-0.287	-0.379	-0.277	-0.473	-0.398	-0.426	-0.322	-0.299	-0.241	-0.337	-0.372	-0.493	0.705	-0.295	-0.344	-0.365	-0.501	2.517	2.094	-0.367	-0.334	-0.394	-0.295
cell homeostasis	-0.347	-0.146	1.062	9.329	3.406	-0.285	9.332	-1.28	-0.299	-0.977	0.058	-1.135	-0.485	-1.7	-1.242	-1.62	-1.198	-1.913	-0.728	-0.568	-1.083	-0.137	0.211	1.167	2.566	-1.326	-1.546	-0.365	-0.348	1.004	0.989	-1.647	0.581	0.01	-1.327
cell ion homeostasis	-0.055	-0.172	2.916	-0.217	-0.262	-0.045	4.217	-1.213	-0.145	-0.857	0.352	-1.075	-0.374	-1.611	-1.176	-1.481	-1.073	-1.812	-0.613	-0.455	-1.026	0.017	0.4	-0.061	1.316	-1.256	-1.465	-1.554	-1.129	1.228	1.239	-1.56	0.041	-1.052	-1.257
cell morphogenesis checkpoint	1.701	4.675	6.229	7.859	5.516	1.387	6.285	-0.18	-0.226	-0.228	-0.386	-0.16	-0.181	-0.239	-0.175	-0.299	-0.252	-0.269	-0.204	-0.189	-0.153	-0.213	-0.235	-0.312	-0.482	-0.187	-0.218	-0.231	-0.317	-0.226	-0.261	-0.232	-0.211	-0.249	-0.187
cell organization and biogenesis	-0.17	1.384	2.158	0.867	0.472	-0.139	3.626	-2.961	-2.805	-1.731	1.171	-1.751	-0.525	-3.25	-2.722	5.852	-3.983	-4.233	-3.061	-2.132	-2.561	0.573	1.992	-4.361	-6.976	0.389	0.707	-4.039	-4.892	0.018	-0.343	-1.717	-3.183	-4.433	-1.067
cell projection	-0.055	5.722	-0.325	-0.217	-0.262	-0.045	-0.231	0.565	0.114	0.091	-1.642	0.818	0.552	-0.003	-0.744	-0.445	-0.101	-0.237	0.317	0.471	0.919	0.228	0.032	-0.53	0.143	-0.795	-0.927	0.068	1.003	1.188	0.763	-0.987	-0.9	0.895	-0.795
cell projection biogenesis								-0.127	-0.16	-0.161	-0.273	-0.113	-0.128	-0.169	-0.124	-0.211	-0.178	-0.19	-0.144	-0.134	-0.108	-0.151	-0.166	-0.22	-0.34	-0.132	-0.154	-0.163	-0.224	-0.16	-0.185	-0.164	-0.149	-0.176	-0.132
cell projection organization and biogenesis								-0.127	-0.16	-0.161	-0.273	-0.113	-0.128	-0.169	-0.124	-0.211	-0.178	-0.19	-0.144	-0.134	-0.108	-0.151	-0.166	-0.22	-0.34	-0.132	-0.154	-0.163	-0.224	-0.16	-0.185	-0.164	-0.149	-0.176	-0.132
cell proliferation	-0.117	-0.366	-0.69	-0.46	-0.557	-0.095	-0.49	-0.312	-0.391	-0.396	0.94	-0.277	-0.314	-0.415	-0.303	1.502	-0.436	-0.467	-0.353	-0.327	-0.264	-0.369	-0.408	-0.54	-0.834	-0.324	-0.377	-0.4	-0.549	-0.391	-0.452	-0.402	-0.366	-0.432	-0.324
cell redox homeostasis	-0.078	-0.244	-0.46	-0.306	-0.371	-0.064	-0.327	-0.404	-0.505	-0.511	-0.863	-0.358	-0.406	-0.536	-0.391	-0.669	-0.563	-0.603	-0.456	-0.423	-0.341	-0.477	-0.526	3.822	4.109	-0.418	-0.487	3.462	2.258	-0.505	-0.584	-0.519	1.692	3.145	-0.418
cell separation during cytokinesis	-0.039	-0.122	-0.23	-0.153	-0.185	-0.032	-0.163	-0.312	-0.391	-0.396	4.158	-0.277	-0.314	-0.415	-0.303	-0.518	-0.436	-0.467	-0.353	-0.327	-0.264	-0.369	-0.408	-0.54	-0.834	-0.324	-0.377	-0.4	-0.549	-0.391	-0.452	-0.402	-0.366	-0.432	-0.324
cell septum	-0.214	5.44	2.936	1.606	-1.02	-0.175	2.56	-0.127	-0.16	-0.161	3.666	-0.113	-0.128	-0.169	-0.124	-0.211	-0.178	-0.19	-0.144	-0.134	-0.108	-0.151	-0.166	-0.22	-0.34	-0.132	-0.154	-0.163	-0.224	-0.16	-0.185	-0.164	-0.149	-0.176	-0.132
cell surface receptor linked signal transduction	-0.347	-1.086	-1.525	-1.366	-1.016	-0.283	-0.737	0.357	0.882	-0.113	-0.624	0.603	1.543	0.712	0.419	0.839	1.448	1.202	0.113	0.265	0.702	1.051	0.763	-0.027	-0.283	0.287	-0.019	-1.088	-0.073	-0.091	-0.381	0.804	0.04	-0.289	1.452
cell wall	-0.039	-0.122	-0.23	-0.153	-0.185	-0.032	-0.163	-0.649	-1.145	-0.578	1.435	-0.399	0.818	0.42	-0.585	0.001	-0.32	-0.557	-0.251	1.39	0.574	1.524	0.492	0.705	1.485	-0.004	0.802	2.327	0.617	1.858	0.601	1.134	3.481	1.899	2.155
cell wall (sensu Fungi)	-0.151	1.683	-0.891	1.134	2.166	-0.123	-0.633	-0.313	-0.781	-0.111	2.633	-0.071	0.54	1.084	-0.251	0.74	0.249	0.015	0.21	2.093	1.049	2.309	1.157	1.595	2.928	0.458	1.477	3.293	1.505	2.731	1.348	1.9	4.595	2.199	2.983
cell wall biosynthesis	-0.156	1.6	-0.921	1.06	2.051	-0.127	-0.654	-0.571	-0.715	0.7	-1.222	-0.506	2.974	-0.759	-0.554	1.269	-0.797	-0.853	-0.646	1.11	-0.483	-0.675	-0.745	0.079	-0.791	-0.592	-0.69	0.677	0.046	-0.715	-0.827	0.668	0.863	-0.79	1.134
cell wall biosynthesis (sensu Bacteria)	-0.039	-0.122	-0.23	-0.153	-0.185	-0.032	-0.163	-0.127	-0.16	-0.161	-0.273	-0.113	-0.128	-0.169	-0.124	-0.211	-0.178	-0.19	-0.144	-0.134	-0.108	-0.151	-0.166	-0.22	-0.34	-0.132	-0.154	-0.163	-0.224	-0.16	-0.185	-0.164	-0.149	-0.176	-0.132
cell wall biosynthesis (sensu Fungi)	-0.087	-0.272	-0.514	-0.343	2.081	-0.071	-0.365	-0.542	-0.678	0.814	-1.159	-0.48	3.195	-0.719	-0.525	1.437	-0.756	-0.809	-0.612	1.232	-0.458	-0.64	-0.707	0.187	-0.673	-0.561	-0.654	0.79	0.155	-0.678	-0.784	0.782	0.98	-0.749	1.257
cell wall catabolism	-0.039	-0.122	-0.23	-0.153	-0.185	-0.032	-0.163	-0.127	-0.16	-0.161	-0.273	-0.113	-0.128	-0.169	-0.124	-0.211	-0.178	-0.19	-0.144	-0.134	-0.108	-0.151	-0.166	-0.22	-0.34	-0.132	-0.154	-0.163	-0.224	-0.16	-0.185	-0.164	-0.149	-0.176	-0.132
cell wall chitin biosynthesis	-0.095	-0.298	-0.563	-0.375	1.824	-0.078	-0.4	-0.312	-0.391	-0.396	-0.668	-0.277	-0.314	-0.415	-0.303	1.502	-0.436	-0.467	-0.353	-0.327	-0.264	-0.369	-0.408	-0.54	-0.834	-0.324	-0.377	-0.4	-0.549	-0.391	-0.452	-0.402	-0.366	-0.432	-0.324
cell wall chitin catabolism	-0.141	-0.44	4.262	1.303	7.077	8.641	2.905	-0.127	-0.16	-0.161	-0.273	-0.113	-0.128	-0.169	-0.124	-0.211	-0.178	-0.19	-0.144	-0.134	-0.108	-0.151	-0.166	-0.22	-0.34	-0.132	-0.154	-0.163	-0.224	-0.16	-0.185	-0.164	-0.149	-0.176	-0.132
cell wall chitin metabolism	-0.141	-0.44	4.262	1.303	7.077	8.641	2.905	-0.338	-0.423	-0.427	-0.722	-0.299	-0.34	-0.448	-0.327	1.311	-0.471	-0.504	-0.381	-0.353	-0.285	-0.399	-0.44	-0.583	-0.901	-0.35	-0.408	-0.432	-0.593	-0.423	-0.489	-0.434	-0.396	-0.467	-0.35
cell wall glycoprotein biosynthesis	-0.039	-0.122	-0.23	-0.153	-0.185	-0.032	-0.163	-0.494	-0.619	-0.626	-1.058	-0.438	-0.498	-0.657	-0.48	-0.819	-0.69	-0.739	-0.559	-0.518	-0.418	-0.584	-0.645	0.376	-0.473	-0.512	-0.597	-0.633	-0.869	-0.619	-0.716	-0.636	-0.58	-0.684	-0.512
cell wall mannoprotein biosynthesis	-0.151	1.683	-0.891	1.134	2.166	-0.123	-0.633	-0.494	-0.619	-0.626	-1.058	-0.438	-0.498	-0.657	-0.48	-0.819	-0.69	-0.739	-0.559	-0.518	-0.418	-0.584	-0.645	0.376	-0.473	-0.512	-0.597	-0.633	-0.869	-0.619	-0.716	-0.636	-0.58	-0.684	-0.512
cell wall organization and biogenesis	-0.431	0.203	0.441	1.412	4.175	2.582	-0.052	-0.132	0.332	0.836	-0.848	0.986	2.592	0.096	-0.756	0.919	-0.102	0.096	1.357	2.376	-0.467	-1.787	-1.437	-0.141	-0.349	-0.899	-1.826	0.24	-0.222	-1.337	-2.188	0.224	0.004	0.441	-0.233
cell wall organization and biogenesis (sensu Bacteria)	-0.129	2.112	-0.763	1.508	2.752	-0.105	-0.542	-0.127	-0.16	-0.161	-0.273	-0.113	-0.128	-0.169	-0.124	-0.211	-0.178	-0.19	-0.144	-0.134	-0.108	-0.151	-0.166	-0.22	-0.34	-0.132	-0.154	-0.163	-0.224	-0.16	-0.185	-0.164	-0.149	-0.176	-0.132
cell wall organization and biogenesis (sensu Fungi)	-0.398	-0.41	-1.89	-0.897	-0.778	-0.325	-1.039	-0.542	-0.678	0.814	-1.159	-0.48	3.195	-0.719	-0.525	1.437	-0.756	-0.809	-0.612	1.232	-0.458	-0.64	-0.707	0.187	-0.673	-0.561	-0.654	0.79	0.155	-0.678	-0.784	0.782	0.98	-0.749	1.257
cell wall polysaccharide biosynthesis (sensu Fungi)	0.665	2.08	2.486	1.358	0.015	0.543	1.208	-0.46	-0.576	1.182	-0.985	-0.408	1.736	-0.611	-0.446	1.984	-0.642	-0.687	-0.52	1.635	-0.389	-0.544	-0.6	0.526	-0.319	-0.477	-0.556	1.156	0.493	-0.576	-0.666	1.147	1.36	-0.636	1.662
cell-cell adhesion	-0.117	-0.366	-0.69	-0.46	-0.557	-0.095	-0.49	-0.442	-0.553	-0.56	2.469	-0.392	-0.445	-0.587	-0.429	-0.733	-0.617	-0.66	-0.5	-0.463	-0.374	-0.523	-0.577	-0.764	0.714	-0.458	-0.534	1.25	-0.777	-0.554	-0.64	-0.569	1.459	1.079	-0.458
cell-matrix adhesion	-0.039	-0.122	-0.23	-0.153	-0.185	-0.032	-0.163	-0.127	-0.16	-0.161	-0.273	-0.113	-0.128	-0.169	-0.124	-0.211	-0.178	5.251	-0.144	-0.134	-0.108	-0.151	-0.166	-0.22	-0.34	-0.132	-0.154	-0.163	-0.224	-0.16	-0.185	-0.164	-0.149	-0.176	-0.132
cell-substrate adhesion	-0.039	-0.122	-0.23	-0.153	-0.185	-0.032	-0.163	-0.127	-0.16	-0.161	-0.273	-0.113	-0.128	-0.169	-0.124	-0.211	-0.178	5.251	-0.144	-0.134	-0.108	-0.151	-0.166	-0.22	-0.34	-0.132	-0.154	-0.163	-0.224	-0.16	-0.185	-0.164	-0.149	-0.176	-0.132
cellular biosynthesis	0.078	0	3.841	2.892	-1.096	1.906	0.555	-0.818	-1.283	-0.911	3.439	-2.611	-1.147	-1.786	0.024	-2.346	-0.941	-0.021	-0.906	0.282	-0.644	-1.035	-2.564	-0.321	-1.75	0.952	-0.706	-0.537	1.378	-1.518	-1.737	-0.569	-0.439	-0.617	0.954
cellular carbohydrate catabolism	-0.274	0.34	-0.959	0.842	-1.306	-0.224	-0.246	4.033	2.797	3.543	-0.181	4.827	0.012	4.038	4.215	-1.06	3.724	3.996	2.517	-0.067	4.128	-1.203	-1.328	0.05	2.266	3.875	2.141	0.289	8.31	1.168	0.657	1.132	3.231	5.394	-1.011
cellular carbohydrate metabolism	-0.53	1.547	-0.307	-0.03	0.478	-0.432	-1.254	6.946	5.639	6.406	-0.262	3.921	0.848	6.322	4.989	-0.078	6.595	9.237	3.286	0.666	3.673	0.096	-0.778	-0.661	2.86	2.851	0.923	1.916	5.104	0.283	0.734	1.048	2.542	2.673	0.747
cellular catabolism	1.197	-1.274	0.644	0.919	-0.109	-0.483	-0.736	1.381	1.57	0.008	-1.545	1.592	-0.487	0.442	1.085	-0.982	1.473	2.535	1.097	-0.207	1.896	-1.963	-2.319	-1.533	0.836	0.734	-0.879	-0.789	3.815	-1.047	-1.089	-0.427	0.872	3.617	-1.038
cellular component unknown								-0.18	-0.226	-0.228	-0.386	-0.16	-0.181	-0.239	-0.175	3.198	-0.252	-0.269	-0.204	-0.189	-0.153	-0.213	-0.235	-0.312	-0.482	-0.187	-0.218	-0.231	-0.317	-0.226	-0.261	-0.232	-0.211	-0.249	-0.187
cellular lipid catabolism	-0.095	-0.298	-0.563	-0.375	-0.455	-0.078	-0.4	-0.312	-0.391	-0.396	0.94	-0.277	-0.314	-0.415	-0.303	-0.518	-0.436	-0.467	-0.353	-0.327	-0.264	-0.369	-0.408	-0.54	0.504	-0.324	-0.377	2.167	1.365	-0.391	-0.452	4.715	5.222	1.957	2.822
cellular lipid metabolism	-0.462	0.01	-0.327	-0.069	0.719	-0.377	-0.29	-1.794	-0.826	1.006	4.578	-0.931	-1.216	-0.592	-1.135	-1.516	-0.795	-1.478	-0.452	0.379	0.565	-1.121	-1.43	-2.049	-2.377	0.413	-0.207	4.187	-1.081	-1.773	-1.771	-0.45	0.935	-1.178	-0.716
cellular localization	-0.716	2.664	3.592	9.79	4.464	-0.585	10.35	-0.64	-0.591	0.245	1.651	-0.453	-2.568	-0.4	-0.483	-3.432	-0.756	-0.729	-0.598	-0.878	-0.233	-1.188	-1.158	-2.783	-5.468	-0.821	-1.628	-2.548	-2.006	0.023	-2.093	-1.668	-1.469	-2.65	-1.191
cellular macromolecule catabolism	-0.463	-0.726	1.647	1.08	0.216	-0.378	0.243	1.304	1.055	0.123	-1.766	1.329	-1.416	0.302	0.901	-1.217	0.828	0.787	0.71	-0.994	0.95	-2.31	-2.128	-1.756	-0.753	0.611	-0.548	-1.647	2.313	-0.696	-1.683	-0.787	0.528	0.912	-2.001
cellular macromolecule metabolism	-1.344	4.256	3.437	1.748	0.303	1.274	0.279	0.081	-0.846	0.234	1.065	-1.513	-1.245	-0.767	0.409	-1.776	-1.602	-1.262	0.395	-0.149	-1.45	-2.107	-2.528	-2.565	-5.272	-1.506	-2.313	-3.929	-3.567	-1.869	-2.612	-3.565	-2.451	-3.164	-2.495
cellular metabolism	1.506	2.504	4.251	2.778	-1.334	0.895	0.552	-1.004	-1.85	-1.956	0.963	-1.551	-0.681	-2.609	-0.837	1.967	-1.46	-1.241	-0.716	-0.229	-0.208	-1.579	-1.143	-0.461	-0.933	1.08	1.434	0.21	-0.658	-2.739	-0.303	-0.754	-0.42	-0.218	0.659
cellular morphogenesis	9.633	-0.322	-0.608	-0.406	-0.491	-0.084	-0.432	-0.83	-1.345	-0.825	-0.529	0.2	-0.161	-0.967	-1.472	-0.382	-1.617	-1.797	-1.104	-0.932	-1.284	0.548	0.686	-1.391	-2.073	-0.243	-0.686	-1.402	-1.454	0.871	0.703	-0.871	-0.009	-1.089	-0.908
cellular morphogenesis during conjugation	8.998	-0.345	0.971	-0.434	-0.525	-0.09	-0.462	2.119	1.528	1.5	-0.863	2.478	2.101	1.387	-0.391	0.897	1.272	1.119	1.786	1.99	-0.341	1.671	1.43	0.809	0.997	-0.418	-0.487	1.473	2.258	1.528	1.189	-0.519	-0.473	3.145	-0.418
cellular morphogenesis during conjugation with cellular fusion	-0.039	-0.122	-0.23	-0.153	5.392	-0.032	-0.163	-0.383	-0.479	-0.485	-0.819	-0.339	-0.385	-0.508	-0.371	-0.634	-0.534	-0.572	-0.433	-0.401	-0.324	1.811	1.562	0.926	1.165	-0.396	-0.462	1.607	2.455	1.664	1.315	-0.492	-0.449	3.373	-0.397
cellular morphogenesis during vegetative growth	2.242	1.337	2.853	3.931	3.846	-0.318	0.937	-0.18	-0.226	-0.228	-0.386	-0.16	-0.181	-0.239	-0.175	-0.299	-0.252	-0.269	-0.204	-0.189	-0.153	-0.213	-0.235	-0.312	-0.482	-0.187	-0.218	-0.231	-0.317	-0.226	-0.261	-0.232	-0.211	-0.249	-0.187
cellular pH reduction	-0.165	-0.518	2.271	15.13	0.529	-0.135	15.649	-0.571	0.724	-0.723	-1.222	-0.506	-0.575	-0.759	-0.554	-0.946	-0.797	-0.853	-0.646	-0.598	-0.483	-0.675	-0.745	-0.987	-1.525	-0.592	-0.69	-0.732	-1.004	-0.715	-0.827	-0.735	-0.67	-0.79	-0.592
cellular physiological process	1.427	2.945	5.081	3.912	2.527	0.014	2.544	-1.19	-1.764	-1.818	0.802	-2.502	-0.599	-3.586	-2.613	0.398	-2.217	-1.899	-2.465	-0.947	-0.218	-1.197	-1.205	-0.386	-1.178	0.98	1.06	0.221	-1.199	-1.336	-0.167	-0.148	0.063	0.941	0.216
cellular polysaccharide catabolism	-0.135	-0.422	-0.797	-0.531	-0.643	-0.11	-0.566	3.966	2.992	6.476	1.203	4.567	1.736	4.45	4.113	0.611	2.578	2.334	3.414	1.635	4.82	-0.544	-0.6	-0.795	-0.319	-0.477	-0.556	-0.59	0.493	-0.576	-0.666	-0.592	-0.539	0.988	-0.477
cellular polysaccharide metabolism	-0.262	2.927	-0.863	0.97	3.766	-0.214	-0.158	4.569	2.38	6.714	0.179	2.883	1.248	6.309	4.762	0.502	3.501	4.615	1.88	1.128	1.801	-0.166	-0.364	-0.955	-1.586	-0.966	-1.126	-0.327	-0.345	-1.168	-1.35	-0.335	0.795	0.325	0.097
cellular process	1.397	3.448	5.372	3.774	2.336	-0.023	2.843	-1.392	-1.803	-2.077	0.418	-2.7	-0.793	-3.881	-2.829	0.098	-2.506	-1.835	-2.708	-1.153	-0.377	-0.518	-0.838	-0.229	-1.356	1.062	1.299	-0.013	-1.067	-0.936	-0.059	0.245	0.539	1.29	0.547
cellular protein catabolism	-0.298	-0.934	1.268	-1.175	0.053	-0.244	-1.252	-0.602	-0.48	-1.727	-2.541	-1.209	-1.372	-1.811	-1.323	-2.259	-0.795	-0.998	-0.188	-0.7	-1.153	-1.612	-1.779	-1.447	-1.763	-1.412	-1.647	-1.747	-1.949	-1.707	-1.974	-1.754	-1.598	-1.885	-1.413
cellular protein metabolism	-1.305	3.879	3.678	1.506	-0.254	1.344	0.539	-0.744	-1.223	-1.355	0.883	-2.222	-1.568	-2.08	-0.716	-1.938	-2.275	-2.205	-0.055	-0.429	-1.903	-1.891	-2.293	-2.397	-5.004	-1.312	-2.095	-3.922	-3.556	-1.636	-2.349	-3.551	-2.464	-3.111	-2.565
cellular respiration	-0.354	-1.107	0.483	-1.393	-1.686	-0.289	-1.484	1.164	2.336	0.331	-1.119	0.697	-0.474	0.786	0.439	-1.102	4.134	8.082	0.727	0.22	1.792	-0.814	-1.031	-1.231	0.608	0.252	-0.861	0.932	1.585	-1.595	-0.701	-0.361	-0.098	2.413	0.251
cellular response to extracellular stimulus	-0.11	-0.345	2.593	-0.434	-0.525	-0.09	-0.462	-0.442	-0.553	-0.56	0.192	-0.392	-0.445	-0.587	-0.429	0.696	-0.617	-0.66	-0.5	1.74	2.337	-0.523	-0.577	0.611	0.714	-0.458	1.387	1.25	0.578	-0.554	0.979	1.241	-0.518	1.079	1.768
cellular response to glucose starvation	-0.039	-0.122	-0.23	-0.153	-0.185	-0.032	-0.163	-0.127	-0.16	-0.161	-0.273	-0.113	-0.128	-0.169	-0.124	-0.211	-0.178	-0.19	-0.144	-0.134	-0.108	-0.151	-0.166	-0.22	-0.34	-0.132	-0.154	-0.163	-0.224	-0.16	-0.185	-0.164	-0.149	-0.176	-0.132
cellular response to nitrogen starvation	-0.039	-0.122	4.353	-0.153	-0.185	-0.032	-0.163	-0.285	-0.357	-0.361	-0.61	-0.253	-0.287	-0.379	-0.277	-0.473	-0.398	-0.426	-0.322	-0.299	-0.241	-0.337	-0.372	-0.493	-0.762	-0.295	-0.344	-0.365	-0.501	-0.357	-0.413	-0.367	-0.334	-0.394	-0.295
cellular response to nutrient levels	-0.11	-0.345	2.593	-0.434	-0.525	-0.09	-0.462	-0.442	-0.553	-0.56	0.192	-0.392	-0.445	-0.587	-0.429	0.696	-0.617	-0.66	-0.5	1.74	2.337	-0.523	-0.577	0.611	0.714	-0.458	1.387	1.25	0.578	-0.554	0.979	1.241	-0.518	1.079	1.768
cellular response to phosphate starvation	-0.067	-0.211	2.249	-0.265	-0.321	-0.055	-0.283	-0.221	-0.276	-0.28	1.802	-0.196	-0.222	-0.293	-0.214	2.49	-0.308	-0.33	-0.25	4.171	5.23	-0.261	-0.288	2.367	1.303	-0.229	3.572	3.347	-0.388	-0.277	2.916	3.333	-0.259	3.072	4.219
cellular response to starvation	-0.11	-0.345	2.593	-0.434	-0.525	-0.09	-0.462	-0.442	-0.553	-0.56	0.192	-0.392	-0.445	-0.587	-0.429	0.696	-0.617	-0.66	-0.5	1.74	2.337	-0.523	-0.577	0.611	0.714	-0.458	1.387	1.25	0.578	-0.554	0.979	1.241	-0.518	1.079	1.768
cellular_component	0.642	2.01	2.308	1.664	0.173	0.524	1.473	-5.461	-4.835	-2.884	-0.872	-2.574	-2.668	-4.233	-3.4	-1.52	-4.408	-3.388	-2.255	-2.383	-2.889	-0.741	-0.139	-2.246	-7.325	-0.237	0.541	-1.336	-2.353	-0.389	-1.118	0.127	-0.407	-0.468	-1.125
cellulase activity	-0.039	-0.122	-0.23	-0.153	-0.185	-0.032	-0.163	-0.127	-0.16	-0.161	3.666	-0.113	-0.128	-0.169	-0.124	-0.211	-0.178	-0.19	-0.144	-0.134	-0.108	-0.151	-0.166	-0.22	-0.34	-0.132	-0.154	-0.163	-0.224	-0.16	-0.185	-0.164	-0.149	-0.176	-0.132
central plaque of spindle pole body								-0.255	-0.319	-0.323	-0.546	-0.226	-0.257	-0.339	-0.247	-0.423	2.544	-0.381	-0.288	-0.267	-0.216	-0.301	-0.333	-0.441	-0.681	-0.264	-0.308	-0.327	-0.448	-0.319	-0.369	-0.328	-0.299	-0.353	-0.264
centromere and kinetochore complex maturation								-0.221	-0.276	-0.28	-0.473	-0.196	-0.222	-0.293	-0.214	-0.366	-0.308	-0.33	-0.25	-0.231	-0.187	-0.261	-0.288	-0.382	-0.59	-0.229	-0.267	-0.283	-0.388	-0.277	-0.32	-0.284	-0.259	-0.305	-0.229
centromeric DNA binding	-0.039	-0.122	-0.23	-0.153	-0.185	-0.032	-0.163	-0.312	-0.391	-0.396	0.94	-0.277	-0.314	-0.415	-0.303	-0.518	-0.436	-0.467	-0.353	-0.327	-0.264	-0.369	-0.408	-0.54	-0.834	-0.324	-0.377	-0.4	-0.549	-0.391	-0.452	-0.402	-0.366	-0.432	-0.324
ceramidase activity	-0.055	-0.172	-0.325	-0.217	-0.262	-0.045	-0.231	-0.18	-0.226	-0.228	-0.386	-0.16	-0.181	-0.239	-0.175	-0.299	-0.252	-0.269	-0.204	-0.189	-0.153	-0.213	-0.235	-0.312	-0.482	-0.187	-0.218	-0.231	-0.317	-0.226	-0.261	-0.232	-0.211	-0.249	-0.187
ceramide biosynthesis	-0.055	-0.172	-0.325	-0.217	-0.262	-0.045	-0.231	-0.18	-0.226	-0.228	5.185	-0.16	-0.181	-0.239	-0.175	-0.299	-0.252	-0.269	-0.204	-0.189	-0.153	-0.213	-0.235	-0.312	-0.482	-0.187	-0.218	-0.231	-0.317	-0.226	-0.261	-0.232	-0.211	-0.249	-0.187
ceramide metabolism	-0.095	-0.298	-0.563	-0.375	-0.455	-0.078	-0.4	-0.312	-0.391	-0.396	2.549	-0.277	-0.314	-0.415	-0.303	-0.518	-0.436	-0.467	-0.353	-0.327	-0.264	-0.369	-0.408	-0.54	-0.834	-0.324	-0.377	-0.4	-0.549	-0.391	-0.452	-0.402	-0.366	-0.432	-0.324
cerevisin activity	-0.039	-0.122	-0.23	-0.153	-0.185	-0.032	-0.163	-0.127	-0.16	-0.161	-0.273	-0.113	-0.128	-0.169	-0.124	-0.211	-0.178	-0.19	-0.144	-0.134	-0.108	-0.151	-0.166	-0.22	2.937	-0.132	-0.154	-0.163	4.463	-0.16	-0.185	-0.164	-0.149	-0.176	-0.132
channel or pore class transporter activity	-0.141	1.875	0.443	-0.553	-0.67	-0.115	-0.589	-0.478	1.121	-0.605	-1.022	-0.423	-0.481	-0.634	-0.463	-0.791	-0.666	-0.713	1.356	1.54	-0.404	3.067	2.684	4.269	3.11	3.629	2.981	4.435	2.924	2.84	2.308	2.738	3.101	4.035	3.627
channel regulator activity	-0.039	-0.122	-0.23	6.528	-0.185	-0.032	-0.163	-0.127	-0.16	-0.161	-0.273	-0.113	-0.128	-0.169	-0.124	-0.211	-0.178	-0.19	-0.144	-0.134	-0.108	-0.151	-0.166	-0.22	-0.34	-0.132	-0.154	-0.163	-0.224	-0.16	-0.185	-0.164	-0.149	-0.176	-0.132
chaperone activator activity	-0.055	-0.172	-0.325	-0.217	-0.262	-0.045	-0.231	-0.18	-0.226	-0.228	-0.386	-0.16	-0.181	-0.239	-0.175	-0.299	-0.252	-0.269	-0.204	-0.189	-0.153	-0.213	-0.235	-0.312	1.836	-0.187	-0.218	-0.231	-0.317	-0.226	-0.261	-0.232	-0.211	-0.249	-0.187
chaperone binding	-0.078	-0.244	-0.46	-0.306	-0.371	-0.064	-0.327	-0.312	-0.391	-0.396	0.94	3.382	-0.314	2.067	3.051	-0.518	-0.436	-0.467	-0.353	-0.327	-0.264	-0.369	-0.408	3.348	1.843	-0.324	-0.377	-0.4	3.28	-0.391	-0.452	-0.402	-0.366	1.957	-0.324
chaperone cofactor dependent protein folding	-0.039	-0.122	-0.23	-0.153	-0.185	-0.032	-0.163	-0.127	-0.16	-0.161	-0.273	-0.113	-0.128	-0.169	-0.124	-0.211	-0.178	-0.19	-0.144	-0.134	-0.108	-0.151	-0.166	4.539	2.937	-0.132	-0.154	-0.163	4.463	-0.16	-0.185	-0.164	-0.149	5.673	-0.132
chaperone regulator activity	-0.067	-0.211	-0.398	-0.265	-0.321	-0.055	-0.283	-0.221	-0.276	-0.28	-0.473	-0.196	-0.222	-0.293	-0.214	-0.366	-0.308	-0.33	-0.25	-0.231	-0.187	-0.261	-0.288	-0.382	1.303	-0.229	-0.267	-0.283	-0.388	-0.277	-0.32	-0.284	-0.259	-0.305	-0.229
chaperonin-containing T-complex								-0.361	-0.452	-0.457	-0.772	-0.32	-0.363	-0.479	-0.35	-0.598	-0.504	-0.539	-0.408	-0.378	-0.305	-0.427	-0.471	-0.624	1.356	-0.374	-0.436	-0.462	-0.634	-0.452	-0.522	-0.464	-0.423	-0.499	-0.374
chaperonin-mediated tubulin folding	-0.039	-0.122	-0.23	-0.153	-0.185	-0.032	-0.163	-0.127	-0.16	-0.161	-0.273	-0.113	-0.128	-0.169	-0.124	-0.211	-0.178	-0.19	-0.144	-0.134	-0.108	-0.151	-0.166	-0.22	-0.34	-0.132	-0.154	-0.163	-0.224	-0.16	-0.185	-0.164	-0.149	-0.176	-0.132
charged-tRNA modification	-0.055	-0.172	-0.325	-0.217	-0.262	-0.045	-0.231	-0.18	-0.226	-0.228	-0.386	-0.16	-0.181	-0.239	-0.175	-0.299	-0.252	-0.269	-0.204	-0.189	-0.153	-0.213	-0.235	-0.312	-0.482	-0.187	-0.218	-0.231	-0.317	-0.226	-0.261	-0.232	-0.211	-0.249	-0.187
chemotaxis								-0.127	-0.16	-0.161	-0.273	-0.113	-0.128	-0.169	-0.124	-0.211	-0.178	-0.19	-0.144	-0.134	-0.108	-0.151	-0.166	-0.22	-0.34	-0.132	-0.154	-0.163	-0.224	-0.16	-0.185	-0.164	-0.149	-0.176	-0.132
chitin binding	-0.055	-0.172	-0.325	-0.217	-0.262	-0.045	-0.231	-0.18	-0.226	-0.228	-0.386	-0.16	-0.181	-0.239	-0.175	-0.299	-0.252	-0.269	-0.204	-0.189	-0.153	-0.213	-0.235	-0.312	-0.482	-0.187	-0.218	-0.231	-0.317	-0.226	-0.261	-0.232	-0.211	-0.249	-0.187
chitin biosynthesis	-0.11	-0.345	-0.65	-0.434	1.449	-0.09	-0.462	-0.404	-0.505	-0.511	-0.863	-0.358	-0.406	-0.536	-0.391	0.897	-0.563	-0.603	-0.456	-0.423	-0.341	-0.477	-0.526	-0.697	-1.078	-0.418	-0.487	-0.517	-0.709	-0.505	-0.584	-0.519	-0.473	-0.558	-0.418
chitin catabolism	-0.087	-0.272	-0.514	-0.343	-0.415	-0.071	-0.365	3.281	2.517	2.482	1.152	3.755	3.257	2.339	3.397	1.74	2.196	2.008	2.847	3.112	3.955	-0.337	-0.372	-0.493	-0.762	-0.295	-0.344	-0.365	-0.501	-0.357	-0.413	-0.367	-0.334	-0.394	-0.295
chitin deacetylase activity	-0.055	-0.172	-0.325	-0.217	-0.262	-0.045	-0.231	5.456	4.318	4.266	2.4	6.176	5.42	4.057	5.631	3.198	3.849	3.578	4.806	5.202	6.481	-0.213	-0.235	-0.312	-0.482	-0.187	-0.218	-0.231	-0.317	-0.226	-0.261	-0.232	-0.211	-0.249	-0.187
chitin localization								-0.127	-0.16	-0.161	-0.273	-0.113	-0.128	-0.169	-0.124	-0.211	-0.178	-0.19	-0.144	-0.134	-0.108	-0.151	-0.166	-0.22	-0.34	-0.132	-0.154	-0.163	-0.224	-0.16	-0.185	-0.164	-0.149	-0.176	-0.132
chitin metabolism	-0.141	-0.44	-0.83	-0.553	0.88	-0.115	-0.589	1.566	1.042	1.017	-0.039	1.878	1.55	0.914	1.643	1.738	0.809	0.668	1.273	1.453	2.007	-0.584	-0.645	-0.854	-1.32	-0.512	-0.597	-0.633	-0.869	-0.619	-0.716	-0.636	-0.58	-0.684	-0.512
chitin synthase activity	-0.055	-0.172	-0.325	-0.217	-0.262	-0.045	-0.231	-0.221	-0.276	-0.28	-0.473	-0.196	-0.222	-0.293	-0.214	-0.366	-0.308	-0.33	-0.25	-0.231	-0.187	-0.261	-0.288	-0.382	-0.59	-0.229	-0.267	-0.283	-0.388	-0.277	-0.32	-0.284	-0.259	-0.305	-0.229
chitinase activity	-0.055	-0.172	-0.325	-0.217	-0.262	-0.045	-0.231	-0.18	-0.226	-0.228	-0.386	-0.16	-0.181	-0.239	-0.175	-0.299	-0.252	-0.269	-0.204	-0.189	-0.153	-0.213	-0.235	-0.312	-0.482	-0.187	-0.218	-0.231	-0.317	-0.226	-0.261	-0.232	-0.211	-0.249	-0.187
chitobiosyldiphosphodolichol beta-mannosyltransferase activity								-0.127	-0.16	-0.161	-0.273	-0.113	-0.128	-0.169	-0.124	-0.211	-0.178	-0.19	-0.144	-0.134	-0.108	-0.151	-0.166	-0.22	-0.34	-0.132	-0.154	-0.163	-0.224	-0.16	-0.185	-0.164	-0.149	-0.176	-0.132
chitosome	-0.039	-0.122	-0.23	-0.153	-0.185	-0.032	-0.163	-0.18	-0.226	-0.228	-0.386	-0.16	-0.181	-0.239	-0.175	-0.299	-0.252	-0.269	-0.204	-0.189	-0.153	-0.213	-0.235	-0.312	-0.482	-0.187	-0.218	-0.231	-0.317	-0.226	-0.261	-0.232	-0.211	-0.249	-0.187
chloride channel activity	-0.055	5.722	2.916	-0.217	-0.262	-0.045	-0.231	-0.18	-0.226	-0.228	-0.386	-0.16	-0.181	-0.239	-0.175	-0.299	-0.252	-0.269	-0.204	-0.189	-0.153	-0.213	-0.235	3.054	1.836	-0.187	-0.218	-0.231	-0.317	-0.226	-0.261	-0.232	-0.211	-0.249	-0.187
chloride transport	-0.039	-0.122	-0.23	-0.153	-0.185	-0.032	-0.163	-0.127	-0.16	-0.161	-0.273	-0.113	-0.128	-0.169	-0.124	-0.211	-0.178	-0.19	-0.144	-0.134	-0.108	-0.151	-0.166	-0.22	-0.34	-0.132	-0.154	-0.163	-0.224	-0.16	-0.185	-0.164	-0.149	-0.176	-0.132
chloride transporter activity	-0.039	-0.122	-0.23	-0.153	-0.185	-0.032	-0.163	-0.127	-0.16	-0.161	-0.273	-0.113	-0.128	-0.169	-0.124	-0.211	-0.178	-0.19	-0.144	-0.134	-0.108	-0.151	-0.166	-0.22	-0.34	-0.132	-0.154	-0.163	-0.224	-0.16	-0.185	-0.164	-0.149	-0.176	-0.132
chloroplast								-0.127	-0.16	-0.161	-0.273	-0.113	-0.128	-0.169	-0.124	-0.211	-0.178	-0.19	-0.144	-0.134	-0.108	-0.151	-0.166	-0.22	-0.34	-0.132	-0.154	-0.163	-0.224	-0.16	-0.185	-0.164	-0.149	-0.176	-0.132
chloroplast stroma								-0.127	-0.16	-0.161	-0.273	-0.113	-0.128	-0.169	-0.124	-0.211	-0.178	-0.19	-0.144	-0.134	-0.108	-0.151	-0.166	-0.22	-0.34	-0.132	-0.154	-0.163	-0.224	-0.16	-0.185	-0.164	-0.149	-0.176	-0.132
cholesterol biosynthesis	-0.055	-0.172	-0.325	-0.217	-0.262	-0.045	-0.231	-0.285	-0.357	-0.361	1.152	-0.253	-0.287	-0.379	-0.277	-0.473	-0.398	-0.426	-0.322	-0.299	-0.241	-0.337	-0.372	-0.493	-0.762	-0.295	-0.344	-0.365	-0.501	-0.357	-0.413	-0.367	-0.334	-0.394	-0.295
cholesterol metabolism	-0.055	-0.172	-0.325	-0.217	-0.262	-0.045	-0.231	-0.285	-0.357	-0.361	1.152	-0.253	-0.287	-0.379	-0.277	-0.473	-0.398	-0.426	-0.322	-0.299	-0.241	-0.337	-0.372	-0.493	-0.762	-0.295	-0.344	-0.365	-0.501	-0.357	-0.413	-0.367	-0.334	-0.394	-0.295
choline kinase activity	-0.055	-0.172	-0.325	-0.217	-0.262	-0.045	-0.231	-0.18	-0.226	-0.228	-0.386	-0.16	-0.181	-0.239	-0.175	-0.299	-0.252	-0.269	-0.204	-0.189	-0.153	-0.213	-0.235	-0.312	-0.482	-0.187	-0.218	-0.231	-0.317	-0.226	-0.261	-0.232	-0.211	-0.249	-0.187
choline transport	-0.039	-0.122	-0.23	-0.153	-0.185	-0.032	-0.163	-0.127	-0.16	-0.161	-0.273	-0.113	-0.128	-0.169	-0.124	-0.211	-0.178	-0.19	-0.144	-0.134	-0.108	-0.151	-0.166	-0.22	-0.34	-0.132	-0.154	-0.163	-0.224	-0.16	-0.185	-0.164	-0.149	-0.176	-0.132
choline transporter activity	-0.039	-0.122	-0.23	-0.153	-0.185	-0.032	-0.163	-0.127	-0.16	-0.161	-0.273	-0.113	-0.128	-0.169	-0.124	-0.211	-0.178	-0.19	-0.144	-0.134	-0.108	-0.151	-0.166	-0.22	-0.34	-0.132	-0.154	-0.163	-0.224	-0.16	-0.185	-0.164	-0.149	-0.176	-0.132
choline-phosphate cytidylyltransferase activity	-0.039	-0.122	-0.23	-0.153	-0.185	-0.032	-0.163	-0.127	-0.16	-0.161	-0.273	-0.113	-0.128	-0.169	-0.124	-0.211	-0.178	-0.19	-0.144	-0.134	-0.108	-0.151	-0.166	-0.22	-0.34	-0.132	-0.154	-0.163	-0.224	-0.16	-0.185	-0.164	-0.149	-0.176	-0.132
chorismate biosynthesis								-0.127	-0.16	-0.161	-0.273	-0.113	-0.128	-0.169	-0.124	-0.211	-0.178	-0.19	-0.144	-0.134	-0.108	-0.151	-0.166	-0.22	-0.34	-0.132	-0.154	-0.163	-0.224	-0.16	-0.185	-0.164	-0.149	-0.176	-0.132
chorismate metabolism								-0.127	-0.16	-0.161	-0.273	-0.113	-0.128	-0.169	-0.124	-0.211	-0.178	-0.19	-0.144	-0.134	-0.108	-0.151	-0.166	-0.22	-0.34	-0.132	-0.154	-0.163	-0.224	-0.16	-0.185	-0.164	-0.149	-0.176	-0.132
chorismate mutase activity	-0.039	-0.122	-0.23	6.528	-0.185	-0.032	-0.163	-0.127	-0.16	-0.161	3.666	-0.113	-0.128	-0.169	-0.124	4.734	-0.178	-0.19	-0.144	-0.134	-0.108	-0.151	-0.166	-0.22	-0.34	-0.132	-0.154	-0.163	-0.224	-0.16	-0.185	-0.164	-0.149	-0.176	-0.132
chorismate synthase activity	-0.039	-0.122	-0.23	-0.153	-0.185	-0.032	-0.163	-0.127	-0.16	-0.161	-0.273	-0.113	-0.128	-0.169	-0.124	-0.211	-0.178	-0.19	-0.144	-0.134	-0.108	-0.151	-0.166	-0.22	-0.34	-0.132	-0.154	-0.163	-0.224	-0.16	-0.185	-0.164	-0.149	-0.176	-0.132
chromatin	-0.078	-0.244	-0.46	-0.306	-0.371	-0.064	-0.327	-0.849	0.882	3.735	3.549	-0.753	-0.855	-1.128	0.419	-1.407	-1.185	-0.445	0.113	1.419	-0.718	-1.004	-1.108	-1.467	-0.779	-0.879	-1.026	-1.088	-1.492	-1.063	-1.229	-1.092	-0.995	-1.174	-0.88
chromatin accessibility complex	-0.087	-0.272	1.537	-0.343	-0.415	-0.071	-0.365	-0.255	-0.319	-0.323	-0.546	-0.226	-0.257	-0.339	-0.247	-0.423	-0.356	-0.381	-0.288	-0.267	-0.216	-0.301	-0.333	-0.441	-0.681	-0.264	-0.308	-0.327	-0.448	-0.319	-0.369	-0.328	-0.299	-0.353	-0.264
chromatin assembly	2.705	1.903	-0.357	-1.321	-0.281	3.449	0.078	-0.349	0.562	2.571	2.924	-0.106	-1.214	-0.948	0.595	-1.998	-1.059	-0.632	-0.601	0.376	-1.02	-0.696	-0.909	-2.084	-2.163	-1.249	-1.456	-1.545	-2.119	-0.819	-1.143	-0.204	-0.678	-1.667	-1.249
chromatin assembly complex	2.876	2.106	-0.744	-1.255	-0.135	3.652	0.224	-0.285	-0.357	-0.361	1.152	-0.253	-0.287	-0.379	-0.277	-0.473	-0.398	-0.426	-0.322	-0.299	-0.241	-0.337	-0.372	-0.493	-0.762	-0.295	-0.344	-0.365	-0.501	-0.357	-0.413	-0.367	-0.334	-0.394	-0.295
chromatin assembly or disassembly	-0.135	-0.422	0.528	-0.531	-0.643	-0.11	1.252	-0.472	0.353	2.247	2.855	-0.226	-1.289	-1.084	0.424	-2.121	-1.198	-0.809	-0.728	0.206	-1.083	-0.825	-1.043	-2.213	-1.757	-1.326	-1.546	-1.64	-2.25	-0.951	-1.285	-0.376	-0.807	-1.77	-1.327
chromatin binding	-0.039	-0.122	-0.23	-0.153	-0.185	-0.032	-0.163	-0.664	-0.831	-0.841	0.859	-0.589	-0.668	-0.882	-0.644	-1.1	-0.927	-0.992	-0.751	-0.695	-0.562	-0.785	-0.866	-1.148	-0.509	-0.688	-0.802	-0.851	-1.167	-0.831	-0.961	-0.854	-0.778	-0.918	-0.688
chromatin disassembly	2	4.166	4.398	-1.674	-0.976	2.623	-0.006	-0.127	-0.16	-0.161	-0.273	-0.113	-0.128	-0.169	-0.124	-0.211	-0.178	-0.19	-0.144	-0.134	-0.108	-0.151	-0.166	-0.22	2.937	-0.132	-0.154	-0.163	-0.224	-0.16	-0.185	-0.164	-0.149	-0.176	-0.132
chromatin modification	-0.265	0.405	3.87	-1.045	-1.265	-0.217	0.752	-1.061	-1.104	-1.636	-0.217	-0.793	-1.695	-1.762	-0.992	-2.791	-1.897	-2.091	-1.903	-1.764	-1.425	-1.991	-2.197	-2.911	-3.217	-1.744	-2.034	-2.157	-2.593	-1.606	-2.438	-1.187	-1.44	-2.329	-1.745
chromatin remodeling	2.441	1.584	1.843	-1.436	-0.523	3.138	0.527	-0.738	-0.666	-1.271	0.426	-0.485	-1.464	-1.385	-0.673	-2.409	-1.508	-1.684	-1.643	-1.523	-1.23	-1.719	-1.897	-2.513	-2.706	-1.506	-1.756	-1.863	-2.134	-1.244	-2.105	-0.745	-1.09	-2.011	-1.507
chromatin remodeling complex	-0.123	2.253	-0.727	-0.485	1.179	-0.101	1.474	-1.097	-1.373	-1.389	0.438	-0.972	-1.104	-1.456	-1.064	-1.234	-1.53	-1.638	-1.24	-1.149	-0.928	-1.296	-1.431	-1.895	-1.77	-1.136	-1.325	-1.405	-1.375	-1.373	-1.587	-1.41	-1.286	-1.516	-1.136
chromatin silencing	-0.123	2.253	-0.727	-0.485	-0.587	-0.101	-0.517	-0.157	0.141	-0.64	0.903	0.083	-1.104	-0.741	-0.096	-1.817	-0.847	-0.997	-1.24	-1.149	-0.928	-1.296	-1.431	-1.895	-2.156	-1.136	-1.325	-1.405	-1.927	-1.373	-1.587	-0.672	-1.286	-1.516	-1.136
chromatin silencing at rDNA	-0.224	0.754	-1.325	-0.884	-0.095	-0.183	1.257	1.655	1.121	-0.605	1.086	1.974	-0.481	0.992	1.734	-0.791	0.885	0.743	-0.54	-0.5	-0.404	-0.565	-0.623	-0.825	-1.275	-0.495	-0.577	-0.612	-0.839	-0.598	-0.691	-0.614	-0.56	-0.66	-0.495
chromatin silencing at silent mating-type cassette	-0.095	-0.298	-0.563	-0.375	-0.455	-0.078	-0.4	-0.557	-0.697	0.756	1.525	-0.494	-0.56	-0.739	-0.54	-0.922	-0.777	-0.832	-0.629	-0.583	-0.471	-0.658	-0.726	-0.962	-0.733	-0.577	-0.672	-0.713	-0.978	-0.697	-0.806	-0.716	-0.653	-0.77	-0.577
chromatin silencing at telomere	-0.291	0.222	-1.715	-1.144	-0.628	-0.237	0.489	0.456	0.007	-1.025	0.144	0.704	-0.815	-0.111	0.518	-1.341	-0.209	-0.345	-0.915	-0.848	-0.685	-0.957	-1.056	-1.399	-2.161	-0.838	-0.977	-1.037	-1.422	-1.013	-1.171	-0.047	-0.949	-1.119	-0.839
chromatin silencing complex	-0.207	-0.647	-0.351	-0.813	-0.985	-0.169	0.326	-0.442	-0.553	-0.56	-0.946	-0.392	-0.445	-0.587	-0.429	0.696	-0.617	-0.66	-0.5	-0.463	-0.374	-0.523	-0.577	-0.764	0.714	-0.458	-0.534	-0.566	-0.777	-0.554	-0.64	-0.569	-0.518	-0.611	-0.458
chromosome	-0.067	-0.211	-0.398	-0.265	-0.321	-0.055	-0.283	-1.342	-0.58	0.262	0.895	-1.684	-1.911	-2.097	-1.268	-1.417	-2.244	-2.076	-1.651	-0.923	-0.95	-2.245	-2.045	-2.616	-2.321	-1.428	-0.899	-1.993	-2.354	-1.928	-2.357	-1.128	-1.269	-1.808	-1.968
chromosome condensation	3.768	3.983	3.934	-1.373	-1.409	2.207	-0.491	-0.423	-0.53	-0.536	-0.906	-0.375	-0.426	-0.562	-0.411	-0.701	-0.591	-0.632	-0.478	-0.443	-0.358	-0.5	-0.552	0.705	-1.13	-0.438	1.495	-0.542	-0.744	-0.53	-0.613	1.346	1.568	1.18	-0.439
chromosome organization and biogenesis	3.738	3.938	3.872	-1.39	-1.43	2.188	-0.515	-1.506	-1.273	-0.062	0.581	-1.21	-1.522	-2.296	-0.888	-2.713	-2.451	-2.316	-1.828	-1.123	-1.717	-1.953	-2.241	-2.568	-1.539	-2.102	-2.014	-2.6	-2.95	-1.696	-2.569	-0.962	-1.029	-2.422	-2.103
chromosome organization and biogenesis (sensu Eukaryota)	-0.265	-0.831	0.472	-0.054	0.389	-0.217	-0.181	-1.467	-1.216	0.013	0.716	-1.175	-1.483	-2.249	-0.843	-2.652	-2.402	-2.26	-1.787	-1.076	-1.691	-1.91	-2.195	-2.502	-1.402	-2.07	-1.971	-2.561	-2.887	-1.645	-2.519	-0.899	-0.974	-2.374	-2.071
chromosome segregation	-0.203	0.974	-0.313	-0.799	0.11	-0.166	-0.851	-0.418	0.445	-0.918	-0.619	-1.106	-1.255	-1.656	-1.21	-1.037	-1.137	-0.164	-0.672	-1.306	-1.055	-0.768	-0.341	-1.165	-1.625	-1.292	-0.122	-1.597	-1.216	-0.893	-0.639	0.352	-0.038	-1.116	-1.292
chromosome\, pericentric region	-0.165	-0.518	-0.977	-0.651	-0.789	-0.135	-0.694	-0.959	-0.338	-0.361	1.652	-0.85	-0.965	-1.274	-0.93	1.068	-1.338	-1.433	-1.084	-1.004	-0.811	-1.134	-0.421	-1.018	-0.8	-0.993	-0.265	-1.229	-0.426	-0.338	-0.635	-0.392	-0.205	-1.326	-0.994
chromosome\, telomeric region	-0.404	-0.44	-0.573	-0.93	-1.374	-0.33	-1.073	-0.723	0.234	-0.916	-0.849	-0.641	-0.728	-0.961	-0.702	-1.198	-1.009	-1.081	-0.817	-0.757	-0.612	-0.855	-0.943	-1.25	-0.188	-0.749	-0.874	-0.927	-1.271	-0.906	-1.047	-0.93	-0.848	-1	-0.749
chronological cell aging	-0.095	-0.298	-0.563	-0.375	-0.455	-0.078	-0.4	-0.383	-0.479	-0.485	-0.819	-0.339	-0.385	-0.508	-0.371	-0.634	-0.534	-0.572	-0.433	-0.401	-0.324	-0.452	-0.499	-0.661	1.165	-0.396	-0.462	-0.49	0.891	-0.479	-0.554	-0.492	-0.449	-0.529	-0.397
cis assembly of pre-catalytic spliceosome								-0.127	-0.16	-0.161	-0.273	-0.113	-0.128	-0.169	-0.124	-0.211	-0.178	-0.19	-0.144	-0.134	-0.108	-0.151	-0.166	-0.22	-0.34	-0.132	-0.154	-0.163	-0.224	-0.16	-0.185	-0.164	-0.149	-0.176	-0.132
cis assembly of U2-type pre-catalytic spliceosome								-0.127	-0.16	-0.161	-0.273	-0.113	-0.128	-0.169	-0.124	-0.211	-0.178	-0.19	-0.144	-0.134	-0.108	-0.151	-0.166	-0.22	-0.34	-0.132	-0.154	-0.163	-0.224	-0.16	-0.185	-0.164	-0.149	-0.176	-0.132
cis-trans isomerase activity	-0.135	-0.422	-0.797	-0.531	-0.643	-0.11	-0.566	-0.46	-0.576	-0.583	1.203	-0.408	-0.463	-0.611	1.833	0.611	-0.642	-0.687	-0.52	1.635	-0.389	-0.544	-0.6	-0.795	-0.319	-0.477	-0.556	-0.59	-0.809	-0.576	-0.666	-0.592	-0.539	-0.636	-0.477
citrate (Si)-synthase activity	-0.067	-0.211	-0.398	-0.265	-0.321	-0.055	-0.283	-0.221	-0.276	-0.28	-0.473	-0.196	-0.222	-0.293	-0.214	-0.366	-0.308	2.812	-0.25	-0.231	-0.187	3.658	3.28	-0.382	-0.59	4.221	-0.267	3.347	-0.388	-0.277	2.916	3.333	3.691	-0.305	4.219
citrate metabolism	-0.078	-0.244	1.833	-0.306	-0.371	-0.064	-0.327	-0.255	-0.319	-0.323	-0.546	-0.226	-0.257	-0.339	-0.247	-0.423	2.544	5.062	-0.288	-0.267	-0.216	3.093	2.758	-0.441	-0.681	3.589	-0.308	2.817	-0.448	-0.319	2.433	2.805	3.122	-0.353	3.588
citrate transport	-0.039	-0.122	-0.23	-0.153	-0.185	-0.032	-0.163	-0.127	-0.16	-0.161	-0.273	-0.113	-0.128	-0.169	-0.124	4.734	-0.178	5.251	-0.144	-0.134	-0.108	-0.151	-0.166	-0.22	-0.34	-0.132	-0.154	-0.163	-0.224	-0.16	-0.185	-0.164	-0.149	-0.176	-0.132
citrulline metabolism	-0.039	-0.122	-0.23	-0.153	-0.185	-0.032	-0.163	-0.127	-0.16	6.194	-0.273	-0.113	7.793	-0.169	-0.124	4.734	-0.178	-0.19	6.94	7.49	9.273	-0.151	-0.166	-0.22	-0.34	-0.132	-0.154	6.123	-0.224	-0.16	-0.185	-0.164	-0.149	-0.176	-0.132
clathrin adaptor complex	-0.087	-0.272	-0.514	-0.343	-0.415	-0.071	-0.365	-0.285	-0.357	-0.361	-0.61	-0.253	-0.287	-0.379	-0.277	-0.473	-0.398	-0.426	-0.322	-0.299	-0.241	-0.337	-0.372	-0.493	-0.762	-0.295	-0.344	-0.365	-0.501	-0.357	-0.413	-0.367	-0.334	-0.394	-0.295
clathrin binding	-0.117	-0.366	-0.69	-0.46	-0.557	-0.095	-0.49	-0.383	-0.479	-0.485	-0.819	-0.339	-0.385	-0.508	-0.371	-0.634	-0.534	-0.572	-0.433	-0.401	-0.324	-0.452	-0.499	-0.661	-1.022	-0.396	-0.462	-0.49	-0.673	-0.479	-0.554	-0.492	-0.449	-0.529	-0.397
clathrin coat	-0.103	-0.322	-0.608	-0.406	-0.491	-0.084	-0.432	-0.511	-0.639	-0.647	-0.107	-0.453	-0.514	-0.678	-0.495	-0.846	-0.713	-0.763	-0.577	-0.535	-0.432	-0.604	-0.666	-0.883	-1.364	-0.529	-0.617	-0.654	-0.897	-0.639	-0.739	-0.657	-0.599	-0.706	-0.529
clathrin coat of trans-Golgi network vesicle	-0.151	1.683	1.479	-0.594	2.166	-0.123	-0.633	-0.338	-0.423	-0.427	-0.722	-0.299	-0.34	-0.448	-0.327	-0.559	-0.471	-0.504	-0.381	-0.353	-0.285	-0.399	-0.44	-0.583	-0.901	-0.35	-0.408	-0.432	-0.593	-0.423	-0.489	-0.434	-0.396	-0.467	-0.35
clathrin vesicle coat	-0.151	1.683	1.479	-0.594	2.166	-0.123	-0.633	-0.511	-0.639	-0.647	-0.107	-0.453	-0.514	-0.678	-0.495	-0.846	-0.713	-0.763	-0.577	-0.535	-0.432	-0.604	-0.666	-0.883	-1.364	-0.529	-0.617	-0.654	-0.897	-0.639	-0.739	-0.657	-0.599	-0.706	-0.529
clathrin-coated vesicle	-0.224	0.754	0.277	-0.884	0.88	-0.183	0.158	-0.746	-0.934	-0.944	-0.918	-0.661	-0.751	-0.99	-0.723	-1.236	-1.041	-1.114	-0.843	-0.781	-0.631	-0.881	-0.973	-1.289	-1.991	-0.772	0.243	0.126	-1.31	0.172	-1.079	-0.959	-0.874	-1.031	-0.773
cleavage and polyadenylylation specificity factor activity	-0.039	-0.122	-0.23	-0.153	-0.185	-0.032	-0.163	-0.46	-0.576	-0.583	-0.985	-0.408	-0.463	-0.611	-0.446	-0.763	-0.642	-0.687	-0.52	-0.482	-0.389	-0.544	-0.6	0.526	-0.319	-0.477	-0.556	-0.59	-0.809	-0.576	0.89	-0.592	-0.539	-0.636	-0.477
C-methyltransferase activity	-0.078	-0.244	-0.46	-0.306	2.419	-0.064	-0.327	-0.255	-0.319	-0.323	1.424	-0.226	-0.257	-0.339	-0.247	-0.423	-0.356	-0.381	-0.288	-0.267	-0.216	3.093	-0.333	1.94	0.958	-0.264	-0.308	-0.327	1.896	-0.319	-0.369	2.805	3.122	2.573	3.588
CoA carboxylase activity								-0.127	-0.16	-0.161	3.666	-0.113	-0.128	-0.169	-0.124	-0.211	-0.178	-0.19	-0.144	-0.134	-0.108	-0.151	-0.166	-0.22	-0.34	-0.132	-0.154	-0.163	-0.224	-0.16	-0.185	-0.164	-0.149	-0.176	-0.132
CoA desaturase activity								-0.127	-0.16	6.194	3.666	-0.113	-0.128	-0.169	-0.124	-0.211	-0.178	-0.19	-0.144	-0.134	-0.108	-0.151	-0.166	-0.22	-0.34	-0.132	-0.154	-0.163	-0.224	-0.16	-0.185	-0.164	-0.149	-0.176	-0.132
CoA hydrolase activity	-0.067	-0.211	-0.398	-0.265	-0.321	-0.055	-0.283	-0.221	-0.276	-0.28	-0.473	-0.196	-0.222	-0.293	-0.214	-0.366	-0.308	-0.33	-0.25	-0.231	-0.187	-0.261	-0.288	-0.382	-0.59	-0.229	-0.267	-0.283	-0.388	-0.277	-0.32	-0.284	-0.259	3.072	-0.229
CoA-ligase activity	-0.067	-0.211	-0.398	-0.265	-0.321	-0.055	-0.283	-0.255	-0.319	-0.323	1.424	-0.226	-0.257	-0.339	-0.247	-0.423	-0.356	-0.381	-0.288	-0.267	-0.216	-0.301	-0.333	-0.441	0.958	-0.264	-0.308	-0.327	-0.448	-0.319	-0.369	-0.328	-0.299	-0.353	-0.264
coated membrane	-0.174	5.059	1.025	-0.687	1.669	-0.142	-0.732	-0.735	-0.92	-0.93	-0.196	-0.651	-0.739	-0.976	-0.712	-1.217	-1.025	-1.097	-0.83	-0.769	-0.621	0.317	1.2	-1.269	-1.962	-0.761	-0.887	0.157	-0.473	0.202	-0.085	-0.945	-0.861	-1.016	-0.761
coated pit	-0.141	1.875	1.716	-0.553	2.429	-0.115	-0.589	-0.46	-0.576	-0.583	0.109	-0.408	-0.463	-0.611	-0.446	-0.763	-0.642	-0.687	-0.52	-0.482	-0.389	-0.544	-0.6	-0.795	-1.229	-0.477	-0.556	-0.59	-0.809	-0.576	-0.666	-0.592	-0.539	-0.636	-0.477
coated vesicle	-0.298	2.373	-0.55	-1.175	0.79	-0.244	-0.42	-1.112	-0.645	-0.669	-0.547	0.056	-1.119	-0.77	-1.078	-1.842	-0.877	-1.028	-0.433	-0.278	0.15	-0.525	-0.013	-1.921	-2.969	-1.152	-0.57	0.038	-1.409	0.102	-0.958	-1.43	-1.303	-1.537	-1.152
cobalt ion transport	-0.039	-0.122	-0.23	-0.153	-0.185	-0.032	-0.163	-0.18	-0.226	-0.228	-0.386	-0.16	-0.181	-0.239	-0.175	-0.299	-0.252	-0.269	-0.204	-0.189	-0.153	-0.213	-0.235	-0.312	1.836	-0.187	-0.218	-0.231	-0.317	-0.226	-0.261	-0.232	-0.211	-0.249	-0.187
cobalt ion transporter activity	-0.055	-0.172	-0.325	-0.217	-0.262	-0.045	4.217	-0.127	-0.16	-0.161	-0.273	-0.113	-0.128	-0.169	-0.124	-0.211	-0.178	-0.19	-0.144	-0.134	-0.108	-0.151	-0.166	-0.22	2.937	-0.132	-0.154	-0.163	-0.224	-0.16	-0.185	-0.164	-0.149	-0.176	-0.132
coenzyme A biosynthesis								-0.18	-0.226	-0.228	-0.386	-0.16	-0.181	-0.239	-0.175	-0.299	-0.252	-0.269	-0.204	-0.189	-0.153	-0.213	-0.235	-0.312	-0.482	-0.187	-0.218	-0.231	-0.317	-0.226	-0.261	-0.232	-0.211	-0.249	-0.187
coenzyme A metabolism								-0.18	-0.226	-0.228	-0.386	-0.16	-0.181	-0.239	-0.175	-0.299	-0.252	-0.269	-0.204	-0.189	-0.153	-0.213	-0.235	-0.312	-0.482	-0.187	-0.218	-0.231	-0.317	-0.226	-0.261	-0.232	-0.211	-0.249	-0.187
coenzyme A transport								-0.127	-0.16	-0.161	-0.273	-0.113	-0.128	-0.169	-0.124	-0.211	-0.178	-0.19	-0.144	-0.134	-0.108	-0.151	-0.166	-0.22	-0.34	-0.132	-0.154	-0.163	-0.224	-0.16	-0.185	-0.164	-0.149	-0.176	-0.132
coenzyme A transporter activity								-0.127	-0.16	-0.161	-0.273	-0.113	-0.128	-0.169	-0.124	-0.211	-0.178	-0.19	-0.144	-0.134	-0.108	-0.151	-0.166	-0.22	-0.34	-0.132	-0.154	-0.163	-0.224	-0.16	-0.185	-0.164	-0.149	-0.176	-0.132
coenzyme binding	-0.141	-0.44	-0.83	-0.553	0.88	-0.115	-0.589	-0.494	-0.619	-0.626	-1.058	-0.438	-0.498	0.914	1.643	-0.819	0.809	0.668	-0.559	-0.518	-0.418	-0.584	4.148	2.837	4.611	-0.512	1.122	0.992	0.343	-0.619	2.182	0.983	-0.58	0.829	3.47
coenzyme biosynthesis	-0.298	-0.934	1.875	5.894	-0.685	-0.244	7.067	0.629	-0.009	-0.753	1.495	0.981	-1.164	-0.175	0.717	-1.916	-0.315	0.1	-1.307	-1.211	0.072	-0.607	-1.508	0.666	0.215	-0.335	0.837	1.334	2.691	-0.009	0.209	-0.084	0.942	1.021	0.527
coenzyme catabolism	-0.207	-0.647	-0.351	-0.813	-0.985	-0.169	-0.867	0.759	2.652	0.277	-1.498	-0.621	0.745	0.182	-0.679	0.65	3.269	6.923	0.506	0.662	1.125	0.415	0.218	-0.339	2.33	0.685	-0.846	1.405	1.344	-0.877	1.038	0.246	0.432	1.173	0.685
coenzyme metabolism	-0.416	-1.301	0.633	3.508	-1.445	-0.339	4.916	0.481	0.789	-0.88	0.7	0.149	-0.876	-0.507	-0.107	-1.722	0.793	2.765	-1.138	-0.964	0.293	-0.676	-1.492	0.96	2.819	0.359	-0.176	1.75	4.436	-0.846	0.138	-0.382	1.104	2.846	0.37
coenzyme transport								-0.127	-0.16	-0.161	-0.273	-0.113	-0.128	-0.169	-0.124	-0.211	-0.178	-0.19	-0.144	-0.134	-0.108	-0.151	-0.166	-0.22	-0.34	-0.132	-0.154	-0.163	-0.224	-0.16	-0.185	-0.164	-0.149	-0.176	-0.132
coenzyme transporter activity								-0.127	-0.16	-0.161	-0.273	-0.113	-0.128	-0.169	-0.124	-0.211	-0.178	-0.19	-0.144	-0.134	-0.108	-0.151	-0.166	-0.22	-0.34	-0.132	-0.154	-0.163	-0.224	-0.16	-0.185	-0.164	-0.149	-0.176	-0.132
cofactor binding	-0.179	1.264	-1.055	-0.704	0.368	-0.146	-0.75	-0.652	0.447	-0.825	-0.62	-0.578	-0.656	1.523	0.982	-0.108	0.231	0.096	-0.736	-0.682	-0.551	0.564	2.794	1.681	2.77	0.84	0.52	1.637	1.619	-0.816	1.26	0.393	-0.764	2.548	3.867
cofactor biosynthesis	-0.316	-0.99	2.717	5.439	-0.81	-0.258	6.538	0.396	-0.239	-0.93	1.803	0.743	-1.262	-0.407	0.484	-1.565	-0.549	-0.183	-1.417	-0.524	-0.089	0.626	-1.635	1.775	0.723	0.297	1.239	0.997	3.619	0.425	0.506	1.629	1.363	1.294	1.89
cofactor catabolism	-0.21	-0.658	-0.387	-0.828	-1.002	-0.172	-0.882	0.724	2.581	0.243	-1.523	-0.631	0.71	0.149	-0.69	0.602	3.184	6.777	0.471	0.628	1.087	0.381	0.185	-0.373	2.822	0.651	-0.86	1.353	1.282	-0.891	1.997	0.213	0.398	1.123	0.65
cofactor metabolism	-0.446	-1.395	1.089	3.066	-1.621	-0.364	4.37	0.784	0.875	-0.664	0.967	-0.11	-0.465	-0.834	0.271	-1.27	0.79	2.544	-0.805	0.013	0.765	1.689	-0.289	2.62	4.646	1.239	0.537	1.738	5.402	0.375	1.903	1.245	2.286	3.135	1.251
cofactor transport	-0.095	-0.298	-0.563	-0.375	-0.455	-0.078	-0.4	-0.255	-0.319	-0.323	-0.546	-0.226	-0.257	-0.339	-0.247	-0.423	-0.356	-0.381	-0.288	-0.267	-0.216	-0.301	-0.333	-0.441	-0.681	-0.264	-0.308	-0.327	-0.448	-0.319	-0.369	-0.328	-0.299	-0.353	-0.264
cofactor transporter activity	-0.055	-0.172	-0.325	-0.217	-0.262	-0.045	-0.231	-0.383	-0.479	-0.485	-0.819	-0.339	-0.385	-0.508	-0.371	-0.634	-0.534	-0.572	-0.433	-0.401	-0.324	-0.452	-0.499	0.926	0.071	-0.396	-0.462	1.607	-0.673	-0.479	1.315	1.597	-0.449	1.422	-0.397
cohesin complex	-0.039	-0.122	-0.23	-0.153	-0.185	-0.032	-0.163	-0.312	-0.391	-0.396	-0.668	-0.277	-0.314	-0.415	-0.303	-0.518	-0.436	-0.467	-0.353	-0.327	-0.264	-0.369	-0.408	1.404	0.504	-0.324	2.338	-0.4	-0.549	-0.391	-0.452	2.156	2.428	1.957	-0.324
COMA complex	-0.055	-0.172	-0.325	-0.217	-0.262	-0.045	-0.231	-0.255	-0.319	-0.323	-0.546	-0.226	-0.257	-0.339	-0.247	-0.423	-0.356	-0.381	-0.288	-0.267	-0.216	-0.301	-0.333	-0.441	-0.681	-0.264	-0.308	-0.327	1.896	-0.319	-0.369	-0.328	-0.299	-0.353	-0.264
commitment complex	-0.078	-0.244	4.125	-0.306	-0.371	-0.064	-0.327	-0.478	-0.598	-0.605	0.032	-0.423	-0.481	-0.634	-0.463	-0.791	-0.666	-0.713	-0.54	-0.5	-0.404	-0.565	-0.623	-0.825	-1.275	-0.495	-0.577	-0.612	-0.839	-0.598	-0.691	-0.614	-0.56	-0.66	-0.495
COMPASS complex	-0.095	-0.298	-0.563	-0.375	-0.455	-0.078	2.169	-0.361	-0.452	-0.457	2.015	-0.32	-0.363	-0.479	-0.35	-0.598	-0.504	-0.539	-0.408	-0.378	-0.305	-0.427	-0.471	-0.624	-0.964	-0.374	-0.436	-0.462	-0.634	-0.452	-0.522	-0.464	-0.423	-0.499	-0.374
condensed chromosome	-0.156	-0.488	0.227	-0.614	-0.743	-0.127	-0.654	-0.055	0.287	-1.32	-0.278	-0.924	-1.049	-0.631	-1.011	0.111	-1.454	-1.557	-1.178	-1.091	0.28	-1.232	-0.594	-0.622	-1.159	-1.079	0.388	-1.335	-0.67	-0.509	-0.814	0.211	0.473	-0.717	-1.08
condensed chromosome kinetochore	-0.161	-0.503	0.165	-0.633	-0.766	-0.131	-0.674	-0.809	0.007	-1.025	0.769	-0.718	-0.815	-1.075	-0.785	1.013	-1.129	-1.209	-0.915	-0.848	-0.685	-0.957	-0.075	-0.643	-1.121	-0.838	0.078	-1.037	0.066	0.006	-0.282	-0.047	0.137	-1.119	-0.839
condensed chromosome\, pericentric region	-0.195	-0.611	-0.233	-0.768	-0.93	-0.159	-0.819	-0.829	-0.043	-1.05	0.666	-0.735	-0.835	-1.102	-0.804	0.924	-1.157	-1.239	-0.937	-0.869	-0.702	-0.98	-0.125	-0.696	-0.692	-0.859	0.028	-1.063	-0.005	-0.043	-0.333	-0.096	0.087	-1.147	-0.859
condensed nuclear chromosome	-0.156	-0.488	0.227	-0.614	-0.743	-0.127	-0.654	-0.008	0.354	-1.289	-0.181	-0.903	-1.024	-0.582	-0.987	0.194	-1.42	-1.521	-1.15	-1.066	0.328	-1.203	-0.545	-0.553	-1.057	-1.054	0.456	-1.304	-0.601	-0.46	-0.763	0.278	0.541	-0.666	-1.055
condensed nuclear chromosome kinetochore	-0.161	-0.503	0.165	-0.633	-0.766	-0.131	-0.674	-0.809	0.007	-1.025	0.769	-0.718	-0.815	-1.075	-0.785	1.013	-1.129	-1.209	-0.915	-0.848	-0.685	-0.957	-0.075	-0.643	-1.121	-0.838	0.078	-1.037	0.066	0.006	-0.282	-0.047	0.137	-1.119	-0.839
condensed nuclear chromosome\, pericentric region	-0.195	-0.611	-0.233	-0.768	-0.93	-0.159	-0.819	-0.829	-0.043	-1.05	0.666	-0.735	-0.835	-1.102	-0.804	0.924	-1.157	-1.239	-0.937	-0.869	-0.702	-0.98	-0.125	-0.696	-0.692	-0.859	0.028	-1.063	-0.005	-0.043	-0.333	-0.096	0.087	-1.147	-0.859
condensin complex								-0.285	-0.357	-0.361	-0.61	-0.253	-0.287	-0.379	-0.277	-0.473	-0.398	-0.426	-0.322	-0.299	-0.241	-0.337	-0.372	-0.493	-0.762	-0.295	-0.344	-0.365	-0.501	-0.357	-0.413	-0.367	-0.334	-0.394	-0.295
conjugation	2.775	-0.023	1.929	1.124	-0.893	-0.268	0.139	-0.461	0.371	-0.317	0.086	-0.216	1.948	-1.072	-0.398	0.914	-0.004	-0.239	0.005	0.22	-0.121	-0.122	-0.401	-0.746	-0.394	-0.534	-0.861	0.291	-0.327	0.37	-0.701	0.916	0.599	0.028	0.251
conjugation with cellular fusion	2.775	-0.023	1.929	1.124	-0.893	-0.268	0.139	-0.461	0.371	-0.317	0.086	-0.216	1.948	-1.072	-0.398	0.914	-0.004	-0.239	0.005	0.22	-0.121	-0.122	-0.401	-0.746	-0.394	-0.534	-0.861	0.291	-0.327	0.37	-0.701	0.916	0.599	0.028	0.251
contractile ring	-0.146	-0.456	2.82	1.214	2.291	-0.119	-0.612	-0.599	-0.75	-0.759	1.242	-0.531	-0.603	-0.796	-0.581	1.12	-0.836	-0.895	-0.677	-0.627	-0.507	-0.708	-0.782	-1.035	-0.9	-0.621	-0.724	-0.768	-1.053	-0.75	-0.867	-0.771	-0.702	-0.828	-0.621
contractile ring (sensu Fungi)	-0.146	-0.456	2.82	1.214	2.291	-0.119	-0.612	-0.599	-0.75	-0.759	1.242	-0.531	-0.603	-0.796	-0.581	1.12	-0.836	-0.895	-0.677	-0.627	-0.507	-0.708	-0.782	-1.035	-0.9	-0.621	-0.724	-0.768	-1.053	-0.75	-0.867	-0.771	-0.702	-0.828	-0.621
contractile ring (sensu Saccharomyces)	-0.146	-0.456	2.82	1.214	2.291	-0.119	-0.612	-0.599	-0.75	-0.759	1.242	-0.531	-0.603	-0.796	-0.581	1.12	-0.836	-0.895	-0.677	-0.627	-0.507	-0.708	-0.782	-1.035	-0.9	-0.621	-0.724	-0.768	-1.053	-0.75	-0.867	-0.771	-0.702	-0.828	-0.621
conversion of met-tRNAf to fmet-tRNA	-0.039	-0.122	-0.23	-0.153	-0.185	-0.032	-0.163	-0.127	-0.16	-0.161	-0.273	-0.113	-0.128	-0.169	-0.124	-0.211	-0.178	-0.19	-0.144	-0.134	-0.108	-0.151	-0.166	-0.22	-0.34	-0.132	-0.154	-0.163	-0.224	-0.16	-0.185	-0.164	-0.149	-0.176	-0.132
COPI vesicle coat	-0.039	-0.122	-0.23	-0.153	-0.185	-0.032	-0.163	-0.338	-0.423	-0.427	0.768	-0.299	-0.34	-0.448	-0.327	-0.559	-0.471	-0.504	-0.381	-0.353	-0.285	-0.399	1.897	-0.583	-0.901	-0.35	-0.408	-0.432	-0.593	-0.423	-0.489	-0.434	-0.396	-0.467	-0.35
COPI-coated vesicle	-0.129	-0.404	-0.763	-0.509	-0.616	-0.105	-0.542	-0.542	-0.678	-0.686	-0.229	-0.48	-0.545	-0.719	-0.525	-0.898	-0.756	-0.809	-0.612	-0.567	-0.458	-0.64	0.752	-0.936	-1.447	-0.561	-0.654	-0.694	-0.952	-0.678	-0.784	-0.697	-0.635	-0.749	-0.561
COPII vesicle coat	-0.055	-0.172	-0.325	-0.217	-0.262	-0.045	-0.231	-0.383	-0.479	-0.485	-0.819	-0.339	-0.385	-0.508	-0.371	-0.634	-0.534	-0.572	-0.433	-0.401	-0.324	1.811	1.562	-0.661	-1.022	-0.396	-0.462	1.607	0.891	1.664	1.315	-0.492	-0.449	-0.529	-0.397
COPII-coated vesicle	-0.146	-0.456	-0.861	-0.574	0.798	-0.119	-0.612	-0.626	0.531	0.507	0.272	1.278	-0.63	0.412	-0.607	-1.037	0.313	0.178	0.742	0.904	1.389	0.648	0.448	-1.082	-1.672	-0.648	-0.756	0.484	-0.141	0.531	0.24	-0.805	-0.734	-0.865	-0.649
copper chaperone activity	-0.067	-0.211	2.249	3.593	-0.321	-0.055	-0.283	-0.221	-0.276	3.39	1.802	4.978	-0.222	3.215	4.527	-0.366	3.04	2.812	-0.25	4.171	-0.187	-0.261	-0.288	2.367	1.303	-0.229	-0.267	-0.283	-0.388	-0.277	2.916	-0.284	3.691	-0.305	-0.229
copper ion binding	-0.11	-0.345	2.593	1.931	-0.525	-0.09	-0.462	-0.423	-0.53	1.382	0.283	2.329	-0.426	4.939	7.023	-0.701	1.159	1.01	3.798	4.158	-0.358	5.644	5.043	5.014	2.826	-0.438	1.495	-0.542	4.915	3.348	2.77	1.346	1.568	6.476	1.886
copper ion homeostasis	-0.095	-0.298	-0.563	5.083	-0.455	-0.078	2.169	-0.312	-0.391	-0.396	0.94	-0.277	2.921	-0.415	-0.303	1.502	-0.436	-0.467	-0.353	-0.327	-0.264	-0.369	-0.408	-0.54	0.504	-0.324	-0.377	-0.4	1.365	-0.391	-0.452	-0.402	-0.366	1.957	-0.324
copper ion import	-0.067	-0.211	-0.398	-0.265	-0.321	-0.055	-0.283	3.281	2.517	2.482	2.914	-0.253	6.801	2.339	7.07	3.952	2.196	2.008	-0.322	-0.299	3.955	-0.337	-0.372	-0.493	-0.762	-0.295	-0.344	-0.365	-0.501	-0.357	-0.413	2.435	2.726	-0.394	-0.295
copper ion transport	-0.095	-0.298	1.309	2.354	-0.455	-0.078	-0.4	1.861	1.303	4.95	3.607	2.197	4.133	2.924	9.062	3.555	2.735	2.484	-0.5	1.74	5.048	-0.523	-0.577	1.987	0.714	-0.458	-0.534	-0.566	0.578	1.303	2.599	4.861	7.389	1.079	-0.458
copper ion transporter activity	-0.123	-0.385	0.724	1.63	-0.587	-0.101	-0.517	2.459	1.821	4.04	2.015	2.85	2.439	3.82	5.46	1.152	3.6	3.311	-0.408	2.319	3.013	-0.427	-0.471	2.744	1.356	-0.374	-0.436	-0.462	1.024	1.821	3.443	1.752	4.417	1.57	-0.374
copper uptake transporter activity	-0.039	-0.122	-0.23	-0.153	-0.185	-0.032	-0.163	4.382	3.434	3.39	1.802	-0.196	4.352	3.215	4.527	2.49	3.04	2.812	-0.25	-0.231	5.23	-0.261	-0.288	-0.382	-0.59	-0.229	-0.267	-0.283	-0.388	-0.277	-0.32	-0.284	-0.259	-0.305	-0.229
copper\, zinc superoxide dismutase activity	-0.039	-0.122	-0.23	6.528	-0.185	-0.032	-0.163	-0.127	-0.16	-0.161	-0.273	-0.113	-0.128	-0.169	-0.124	-0.211	-0.178	-0.19	-0.144	-0.134	-0.108	-0.151	-0.166	-0.22	2.937	-0.132	-0.154	-0.163	4.463	-0.16	-0.185	-0.164	-0.149	-0.176	-0.132
copper-exporting ATPase activity	-0.055	-0.172	-0.325	-0.217	-0.262	-0.045	-0.231	-0.18	-0.226	-0.228	-0.386	-0.16	-0.181	-0.239	-0.175	-0.299	-0.252	-0.269	-0.204	-0.189	-0.153	-0.213	-0.235	3.054	1.836	-0.187	-0.218	-0.231	2.998	4.318	3.702	4.197	4.626	3.887	-0.187
coproporphyrinogen oxidase activity								-0.127	-0.16	-0.161	3.666	-0.113	-0.128	-0.169	-0.124	4.734	-0.178	-0.19	-0.144	7.49	-0.108	-0.151	-0.166	-0.22	-0.34	-0.132	-0.154	-0.163	-0.224	-0.16	-0.185	-0.164	-0.149	-0.176	-0.132
cortical actin cytoskeleton	-0.123	-0.385	-0.727	1.63	1.179	-0.101	-0.517	-0.933	-1.168	-1.181	-1.452	-0.827	-0.939	-1.239	-0.905	-1.545	-1.302	-1.393	-1.054	-0.977	-0.789	-1.103	-1.217	-0.955	-2.038	-0.966	-1.126	-0.327	-0.992	-1.168	-1.35	-0.335	-0.149	-1.29	0.097
cortical actin cytoskeleton organization and biogenesis	-0.253	0.5	-0.075	4.184	6.578	-0.207	-0.088	-0.478	-0.598	-0.605	-1.022	-0.423	-0.481	-0.634	-0.463	-0.791	-0.666	-0.713	-0.54	-0.5	-0.404	-0.565	-0.623	-0.825	-1.275	-0.495	-0.577	-0.612	-0.839	-0.598	-0.691	-0.614	1.271	-0.66	-0.495
cortical cytoskeleton	-0.123	-0.385	-0.727	1.63	1.179	-0.101	-0.517	-0.933	-1.168	-1.181	-1.452	-0.827	-0.939	-1.239	-0.905	-1.545	-1.302	-1.393	-1.054	-0.977	-0.789	-1.103	-1.217	-0.955	-2.038	-0.966	-1.126	-0.327	-0.992	-1.168	-1.35	-0.335	-0.149	-1.29	0.097
cortical cytoskeleton organization and biogenesis	-0.253	0.5	-0.075	4.184	6.578	-0.207	-0.088	-0.478	-0.598	-0.605	-1.022	-0.423	-0.481	-0.634	-0.463	-0.791	-0.666	-0.713	-0.54	-0.5	-0.404	-0.565	-0.623	-0.825	-1.275	-0.495	-0.577	-0.612	-0.839	-0.598	-0.691	-0.614	1.271	-0.66	-0.495
cotranslational protein folding	-0.067	-0.211	-0.398	-0.265	-0.321	-0.055	-0.283	-0.221	-0.276	-0.28	1.802	-0.196	-0.222	-0.293	-0.214	-0.366	-0.308	-0.33	-0.25	-0.231	-0.187	-0.261	-0.288	-0.382	-0.59	-0.229	-0.267	-0.283	-0.388	-0.277	-0.32	-0.284	-0.259	-0.305	-0.229
cotranslational protein targeting to membrane	-0.117	-0.366	2.368	3.999	-0.557	-0.095	1.609	1.34	0.839	-0.686	0.701	-0.48	-0.545	-0.719	-0.525	-0.898	-0.756	-0.809	-0.612	-0.567	-0.458	-0.64	-0.707	1.311	0.875	-0.561	-0.654	0.79	3.474	0.838	-0.784	-0.697	-0.635	2.013	1.257
covalent chromatin modification	-0.238	4.762	4.651	-0.936	-1.133	-0.194	0.041	-0.915	-1.145	-1.158	-0.295	-0.811	-0.921	-1.215	-0.887	-1.516	-1.277	-1.367	-1.034	-0.958	-0.774	-1.081	-1.193	-1.581	-1.982	-0.947	-1.105	-1.172	-1.608	-1.145	-1.324	-1.176	-1.072	-1.265	-0.948
C-palmitoyltransferase activity								-0.18	-0.226	-0.228	-0.386	-0.16	-0.181	-0.239	-0.175	-0.299	-0.252	-0.269	-0.204	-0.189	-0.153	-0.213	-0.235	-0.312	-0.482	-0.187	-0.218	-0.231	-0.317	-0.226	-0.261	-0.232	-0.211	-0.249	-0.187
C-terminal protein amino acid methylation	-0.039	-0.122	-0.23	-0.153	-0.185	-0.032	-0.163	-0.18	-0.226	-0.228	2.4	-0.16	-0.181	4.057	-0.175	-0.299	-0.252	-0.269	-0.204	-0.189	-0.153	-0.213	-0.235	-0.312	-0.482	-0.187	-0.218	-0.231	-0.317	-0.226	-0.261	-0.232	-0.211	-0.249	-0.187
C-terminal protein carboxyl methyltransferase activity	-0.039	-0.122	-0.23	-0.153	-0.185	-0.032	-0.163	-0.127	-0.16	-0.161	3.666	-0.113	-0.128	5.906	-0.124	-0.211	-0.178	-0.19	-0.144	-0.134	-0.108	-0.151	-0.166	-0.22	-0.34	-0.132	-0.154	-0.163	-0.224	-0.16	-0.185	-0.164	-0.149	-0.176	-0.132
CTP biosynthesis	-0.055	-0.172	-0.325	-0.217	-0.262	-0.045	-0.231	-0.18	-0.226	-0.228	-0.386	-0.16	-0.181	-0.239	-0.175	-0.299	-0.252	-0.269	-0.204	-0.189	-0.153	-0.213	-0.235	-0.312	-0.482	-0.187	4.484	-0.231	-0.317	-0.226	-0.261	-0.232	-0.211	-0.249	-0.187
CTP metabolism	-0.055	-0.172	-0.325	-0.217	-0.262	-0.045	-0.231	-0.18	-0.226	-0.228	-0.386	-0.16	-0.181	-0.239	-0.175	-0.299	-0.252	-0.269	-0.204	-0.189	-0.153	-0.213	-0.235	-0.312	-0.482	-0.187	4.484	-0.231	-0.317	-0.226	-0.261	-0.232	-0.211	-0.249	-0.187
CTP synthase activity	-0.055	-0.172	-0.325	-0.217	-0.262	-0.045	-0.231	-0.18	-0.226	-0.228	-0.386	-0.16	-0.181	-0.239	-0.175	-0.299	-0.252	-0.269	-0.204	-0.189	-0.153	-0.213	-0.235	-0.312	1.836	-0.187	4.484	-0.231	-0.317	-0.226	-0.261	-0.232	-0.211	-0.249	-0.187
cullin-RING ubiquitin ligase complex	-0.055	-0.172	-0.325	-0.217	-0.262	-0.045	-0.231	-0.285	-0.357	-0.361	-0.61	-0.253	-0.287	-0.379	-0.277	-0.473	-0.398	-0.426	-0.322	-0.299	-0.241	-0.337	-0.372	1.636	2.171	-0.295	-0.344	-0.365	1.596	-0.357	-0.413	-0.367	-0.334	-0.394	-0.295
cyclase activity								-0.18	-0.226	-0.228	-0.386	-0.16	-0.181	-0.239	-0.175	-0.299	-0.252	-0.269	-0.204	-0.189	-0.153	-0.213	4.135	-0.312	-0.482	-0.187	-0.218	-0.231	2.998	-0.226	-0.261	4.197	-0.211	-0.249	-0.187
cyclic nucleotide binding	-0.039	8.213	4.353	-0.153	-0.185	-0.032	-0.163	-0.127	-0.16	-0.161	-0.273	-0.113	-0.128	-0.169	-0.124	-0.211	-0.178	-0.19	-0.144	-0.134	-0.108	-0.151	-0.166	-0.22	-0.34	-0.132	-0.154	-0.163	-0.224	-0.16	-0.185	-0.164	-0.149	-0.176	-0.132
cyclic nucleotide biosynthesis								-0.127	-0.16	-0.161	-0.273	-0.113	-0.128	-0.169	-0.124	-0.211	-0.178	-0.19	-0.144	-0.134	-0.108	-0.151	-0.166	-0.22	-0.34	-0.132	-0.154	-0.163	4.463	-0.16	-0.185	-0.164	-0.149	-0.176	-0.132
cyclic nucleotide catabolism	-0.039	-0.122	-0.23	-0.153	-0.185	-0.032	-0.163	-0.127	-0.16	-0.161	-0.273	-0.113	-0.128	-0.169	-0.124	-0.211	-0.178	-0.19	-0.144	-0.134	-0.108	-0.151	-0.166	-0.22	-0.34	-0.132	-0.154	-0.163	-0.224	-0.16	-0.185	-0.164	-0.149	-0.176	-0.132
cyclic nucleotide metabolism	-0.039	-0.122	-0.23	-0.153	-0.185	-0.032	-0.163	-0.18	-0.226	-0.228	-0.386	-0.16	-0.181	-0.239	-0.175	-0.299	-0.252	-0.269	-0.204	-0.189	-0.153	-0.213	-0.235	-0.312	-0.482	-0.187	-0.218	-0.231	2.998	-0.226	-0.261	-0.232	-0.211	-0.249	-0.187
cyclic nucleotide-dependent protein kinase activity	-0.067	-0.211	2.249	-0.265	-0.321	-0.055	-0.283	-0.221	-0.276	-0.28	-0.473	-0.196	-0.222	-0.293	-0.214	-0.366	-0.308	-0.33	-0.25	-0.231	-0.187	-0.261	-0.288	-0.382	-0.59	-0.229	-0.267	-0.283	-0.388	-0.277	-0.32	-0.284	-0.259	-0.305	-0.229
cyclic-nucleotide phosphodiesterase activity	-0.067	4.602	-0.398	-0.265	-0.321	-0.055	3.35	-0.221	-0.276	-0.28	-0.473	-0.196	-0.222	-0.293	-0.214	-0.366	-0.308	-0.33	-0.25	-0.231	-0.187	-0.261	-0.288	-0.382	-0.59	-0.229	-0.267	-0.283	-0.388	-0.277	-0.32	-0.284	-0.259	-0.305	-0.229
cyclic-nucleotide-mediated signaling	-0.095	3.106	-0.563	-0.375	-0.455	-0.078	2.169	-0.361	-0.452	-0.457	2.015	-0.32	-0.363	1.67	-0.35	1.152	1.548	1.386	-0.408	-0.378	-0.305	1.974	1.716	1.06	0.196	-0.374	-0.436	-0.462	2.683	-0.452	-0.522	1.752	-0.423	1.57	2.351
cyclin binding	-0.039	-0.122	-0.23	-0.153	-0.185	-0.032	-0.163	-0.127	-0.16	-0.161	-0.273	-0.113	-0.128	-0.169	-0.124	-0.211	-0.178	-0.19	-0.144	-0.134	-0.108	-0.151	-0.166	-0.22	-0.34	-0.132	-0.154	-0.163	-0.224	-0.16	-0.185	-0.164	-0.149	-0.176	-0.132
cyclin catabolism	-0.078	-0.244	-0.46	-0.306	-0.371	-0.064	-0.327	-0.46	-0.576	-0.583	-0.985	-0.408	-0.463	-0.611	-0.446	-0.763	-0.642	-0.687	-0.52	-0.482	-0.389	-0.544	-0.6	-0.795	-1.229	-0.477	-0.556	-0.59	-0.809	-0.576	-0.666	-0.592	-0.539	-0.636	-0.477
cyclin-dependent protein kinase activity	-0.078	8.094	1.833	-0.306	-0.371	-0.064	-0.327	-0.338	-0.423	-0.427	-0.722	-0.299	-0.34	-0.448	-0.327	-0.559	-0.471	-0.504	-0.381	-0.353	-0.285	-0.399	-0.44	-0.583	0.338	-0.35	-0.408	-0.432	-0.593	-0.423	-0.489	-0.434	-0.396	-0.467	-0.35
cyclin-dependent protein kinase holoenzyme complex	-0.11	-0.345	0.971	-0.434	1.449	-0.09	-0.462	-0.404	-0.505	3.512	1.63	-0.358	-0.406	-0.536	-0.391	-0.669	-0.563	-0.603	1.786	-0.423	-0.341	1.671	1.43	0.809	0.997	2.021	1.617	1.473	0.774	1.528	1.189	3.446	1.692	3.145	2.02
cyclin-dependent protein kinase inhibitor activity	-0.055	-0.172	-0.325	-0.217	-0.262	-0.045	-0.231	-0.18	-0.226	-0.228	-0.386	-0.16	-0.181	-0.239	-0.175	-0.299	-0.252	-0.269	-0.204	-0.189	-0.153	-0.213	-0.235	-0.312	-0.482	-0.187	-0.218	-0.231	-0.317	-0.226	-0.261	-0.232	-0.211	-0.249	-0.187
cyclin-dependent protein kinase regulator activity	-0.135	1.987	3.177	-0.531	2.581	-0.11	-0.566	1.566	1.042	2.66	1.997	-0.438	-0.498	0.914	1.643	-0.819	0.809	0.668	3.104	1.453	-0.418	2.925	2.55	1.606	1.222	3.472	2.841	2.617	1.555	2.703	2.182	4.222	2.958	3.853	3.47
cyclohydrolase activity	-0.095	-0.298	-0.563	-0.375	-0.455	-0.078	-0.4	-0.338	-0.423	1.976	0.768	-0.299	-0.34	-0.448	-0.327	-0.559	-0.471	-0.504	-0.381	2.53	3.262	-0.399	-0.44	-0.583	0.338	-0.35	-0.408	-0.432	-0.593	-0.423	-0.489	-0.434	-0.396	-0.467	-0.35
cyclo-ligase activity	-0.067	-0.211	-0.398	-0.265	-0.321	-0.055	-0.283	-0.221	-0.276	-0.28	-0.473	-0.196	-0.222	-0.293	-0.214	-0.366	-0.308	-0.33	-0.25	-0.231	-0.187	-0.261	-0.288	-0.382	-0.59	-0.229	-0.267	-0.283	-0.388	-0.277	-0.32	-0.284	-0.259	-0.305	-0.229
cystathionine beta-lyase activity	-0.039	-0.122	-0.23	-0.153	-0.185	-0.032	-0.163	-0.18	-0.226	-0.228	2.4	-0.16	5.42	-0.239	-0.175	3.198	-0.252	-0.269	-0.204	-0.189	-0.153	-0.213	-0.235	3.054	1.836	5.262	-0.218	-0.231	2.998	-0.226	-0.261	4.197	4.626	3.887	-0.187
cystathionine beta-synthase activity	-0.039	-0.122	4.353	6.528	5.392	-0.032	-0.163	-0.127	-0.16	-0.161	-0.273	-0.113	-0.128	-0.169	-0.124	-0.211	-0.178	-0.19	-0.144	-0.134	-0.108	-0.151	-0.166	4.539	2.937	-0.132	-0.154	-0.163	-0.224	-0.16	-0.185	-0.164	-0.149	-0.176	-0.132
cystathionine gamma-lyase activity	-0.039	8.213	4.353	6.528	5.392	-0.032	-0.163	-0.127	-0.16	-0.161	-0.273	-0.113	-0.128	-0.169	-0.124	-0.211	-0.178	-0.19	-0.144	-0.134	-0.108	-0.151	-0.166	4.539	2.937	-0.132	-0.154	-0.163	4.463	-0.16	-0.185	-0.164	-0.149	-0.176	7.57
cystathionine gamma-synthase activity	-0.067	-0.211	-0.398	-0.265	-0.321	-0.055	-0.283	-0.221	-0.276	-0.28	-0.473	-0.196	-0.222	-0.293	-0.214	-0.366	-0.308	-0.33	-0.25	-0.231	-0.187	-0.261	-0.288	-0.382	1.303	-0.229	-0.267	-0.283	-0.388	-0.277	-0.32	-0.284	-0.259	-0.305	-0.229
cysteine biosynthesis	-0.055	-0.172	2.916	4.508	3.682	-0.045	-0.231	-0.423	-0.53	-0.536	-0.906	-0.375	-0.426	-0.562	-0.411	-0.701	-0.591	-0.632	-0.478	-0.443	-0.358	-0.5	-0.552	10.759	6.783	1.887	-0.511	1.355	9.159	-0.53	-0.613	7.017	5.698	6.476	11.184
cysteine biosynthesis from serine	-0.039	-0.122	4.353	6.528	5.392	-0.032	-0.163	-0.18	-0.226	-0.228	-0.386	-0.16	-0.181	-0.239	-0.175	-0.299	-0.252	-0.269	-0.204	-0.189	-0.153	-0.213	-0.235	3.054	1.836	-0.187	-0.218	-0.231	-0.317	-0.226	-0.261	-0.232	-0.211	-0.249	-0.187
cysteine biosynthesis via cystathione	-0.117	2.415	2.368	3.999	3.165	-0.095	-0.49	-0.127	-0.16	-0.161	-0.273	-0.113	-0.128	-0.169	-0.124	-0.211	-0.178	-0.19	-0.144	-0.134	-0.108	-0.151	-0.166	4.539	2.937	-0.132	-0.154	-0.163	-0.224	-0.16	-0.185	-0.164	-0.149	-0.176	-0.132
cysteine desulfurase activity								-0.127	-0.16	-0.161	-0.273	-0.113	-0.128	-0.169	-0.124	-0.211	-0.178	-0.19	-0.144	-0.134	-0.108	-0.151	-0.166	-0.22	2.937	-0.132	-0.154	-0.163	-0.224	-0.16	-0.185	-0.164	-0.149	-0.176	-0.132
cysteine metabolism	-0.117	2.415	2.368	3.999	3.165	-0.095	-0.49	-0.442	-0.553	-0.56	-0.946	-0.392	-0.445	-0.587	-0.429	-0.733	-0.617	-0.66	-0.5	-0.463	-0.374	-0.523	-0.577	10.238	6.397	1.769	-0.534	1.25	8.705	-0.554	-0.64	6.671	5.412	6.15	10.671
cysteine synthase activity	-0.055	-0.172	-0.325	-0.217	-0.262	-0.045	-0.231	-0.18	-0.226	-0.228	-0.386	-0.16	-0.181	-0.239	-0.175	-0.299	-0.252	-0.269	-0.204	-0.189	-0.153	-0.213	-0.235	-0.312	-0.482	-0.187	-0.218	-0.231	-0.317	-0.226	-0.261	-0.232	-0.211	-0.249	-0.187
cysteine-tRNA ligase activity								-0.127	-0.16	-0.161	-0.273	-0.113	-0.128	-0.169	-0.124	-0.211	-0.178	-0.19	-0.144	-0.134	-0.108	-0.151	-0.166	-0.22	-0.34	-0.132	-0.154	-0.163	-0.224	-0.16	-0.185	-0.164	-0.149	-0.176	-0.132
cysteine-type endopeptidase activity	-0.17	-0.532	0.05	-0.669	-0.81	-0.139	-0.713	1.053	0.576	-0.776	-1.311	-0.543	-0.617	-0.814	-0.594	-1.015	1.568	1.359	-0.692	-0.642	-0.518	-0.724	-0.799	-1.059	-1.636	-0.635	-0.74	-0.785	-1.077	-0.767	-0.887	-0.788	-0.718	-0.847	-0.635
cysteine-type peptidase activity	-0.174	-0.546	-0.003	-0.687	-0.831	-0.142	-0.732	0.915	0.447	-0.825	-1.394	-0.578	-0.656	-0.865	-0.632	-1.08	1.371	1.166	-0.736	-0.682	-0.551	-0.77	-0.85	-1.126	-1.74	-0.675	-0.787	-0.835	-1.145	-0.816	-0.943	-0.838	-0.764	-0.901	-0.675
cysteinyl-tRNA aminoacylation								-0.127	-0.16	-0.161	-0.273	-0.113	-0.128	-0.169	-0.124	-0.211	-0.178	-0.19	-0.144	-0.134	-0.108	-0.151	-0.166	-0.22	-0.34	-0.132	-0.154	-0.163	-0.224	-0.16	-0.185	-0.164	-0.149	-0.176	-0.132
cytidine catabolism								-0.127	-0.16	-0.161	-0.273	-0.113	-0.128	-0.169	-0.124	-0.211	-0.178	-0.19	-0.144	-0.134	-0.108	-0.151	-0.166	-0.22	-0.34	-0.132	-0.154	-0.163	-0.224	-0.16	-0.185	-0.164	-0.149	-0.176	-0.132
cytidine deaminase activity								-0.127	-0.16	-0.161	-0.273	-0.113	-0.128	-0.169	-0.124	-0.211	-0.178	-0.19	-0.144	-0.134	-0.108	-0.151	-0.166	-0.22	-0.34	-0.132	-0.154	-0.163	-0.224	-0.16	-0.185	-0.164	-0.149	-0.176	-0.132
cytidine metabolism								-0.127	-0.16	-0.161	-0.273	-0.113	-0.128	-0.169	-0.124	-0.211	-0.178	-0.19	-0.144	-0.134	-0.108	-0.151	-0.166	-0.22	-0.34	-0.132	-0.154	-0.163	-0.224	-0.16	-0.185	-0.164	-0.149	-0.176	-0.132
cytochrome bc(1) complex assembly	-0.039	-0.122	-0.23	-0.153	-0.185	-0.032	-0.163	-0.127	-0.16	-0.161	-0.273	-0.113	-0.128	-0.169	-0.124	-0.211	-0.178	-0.19	-0.144	-0.134	-0.108	-0.151	-0.166	-0.22	-0.34	-0.132	-0.154	-0.163	-0.224	-0.16	-0.185	-0.164	-0.149	-0.176	-0.132
cytochrome c oxidase complex assembly	-0.123	-0.385	0.724	-0.485	-0.587	-0.101	-0.517	-0.404	-0.505	1.5	0.383	2.478	-0.406	1.387	2.207	-0.669	1.272	2.841	-0.456	1.99	-0.341	-0.477	-0.526	-0.697	-1.078	-0.418	-0.487	-0.517	-0.709	-0.505	-0.584	-0.519	-0.473	-0.558	-0.418
cytochrome c-heme linkage	-0.067	-0.211	-0.398	-0.265	-0.321	-0.055	-0.283	-0.221	-0.276	-0.28	-0.473	-0.196	-0.222	-0.293	-0.214	-0.366	-0.308	-0.33	-0.25	-0.231	-0.187	-0.261	-0.288	-0.382	-0.59	-0.229	-0.267	-0.283	-0.388	-0.277	-0.32	-0.284	-0.259	-0.305	-0.229
cytochrome complex assembly	-0.087	-0.272	-0.514	-0.343	-0.415	-0.071	-0.365	-0.285	-0.357	-0.361	-0.61	-0.253	-0.287	-0.379	-0.277	-0.473	-0.398	-0.426	-0.322	-0.299	-0.241	-0.337	-0.372	-0.493	-0.762	-0.295	-0.344	-0.365	-0.501	-0.357	-0.413	-0.367	-0.334	-0.394	-0.295
cytochrome-b5 reductase activity	-0.055	-0.172	-0.325	-0.217	-0.262	-0.045	-0.231	-0.18	-0.226	-0.228	-0.386	-0.16	-0.181	-0.239	-0.175	-0.299	3.849	-0.269	-0.204	-0.189	-0.153	-0.213	-0.235	-0.312	-0.482	-0.187	-0.218	-0.231	-0.317	-0.226	-0.261	-0.232	-0.211	-0.249	-0.187
cytochrome-c oxidase activity	-0.11	-0.345	-0.65	-0.434	-0.525	-0.09	-0.462	-0.494	1.042	1.017	-0.039	1.878	-0.498	0.914	1.643	-0.819	2.309	3.482	-0.559	-0.518	2.007	-0.584	-0.645	0.376	0.374	-0.512	-0.597	2.617	0.343	-0.619	-0.716	-0.636	-0.58	0.829	-0.512
cytochrome-c peroxidase activity	-0.039	-0.122	-0.23	-0.153	-0.185	-0.032	-0.163	-0.127	-0.16	-0.161	-0.273	-0.113	-0.128	-0.169	-0.124	-0.211	-0.178	-0.19	-0.144	-0.134	-0.108	-0.151	-0.166	-0.22	-0.34	-0.132	-0.154	-0.163	-0.224	-0.16	-0.185	-0.164	-0.149	-0.176	-0.132
cytogamy	-0.067	-0.211	-0.398	-0.265	-0.321	-0.055	-0.283	-0.255	-0.319	-0.323	-0.546	-0.226	-0.257	-0.339	-0.247	-0.423	-0.356	-0.381	-0.288	-0.267	-0.216	3.093	2.758	1.94	0.958	-0.264	-0.308	2.817	1.896	2.894	2.433	-0.328	-0.299	2.573	-0.264
cytokinesis	-0.078	-0.244	-0.46	-0.306	-0.371	-0.064	-0.327	-1.102	-2.147	-2.172	-0.036	-1.521	-1.117	-2.277	-1.663	-0.941	-2.393	-2.562	-1.938	-1.796	-1.451	1.103	0.138	-1.5	-2.564	1.777	1.506	-0.264	-1.212	0.816	0.533	1.646	0.093	0.326	0.591
cytokinesis\, completion of separation	-0.039	-0.122	-0.23	-0.153	-0.185	-0.032	-0.163	-0.312	-0.391	-0.396	4.158	-0.277	-0.314	-0.415	-0.303	-0.518	-0.436	-0.467	-0.353	-0.327	-0.264	-0.369	-0.408	-0.54	-0.834	-0.324	-0.377	-0.4	-0.549	-0.391	-0.452	-0.402	-0.366	-0.432	-0.324
cytokinesis\, contractile ring contraction	-0.26	1.715	2.636	5.055	4.681	-0.212	0.818	-0.127	-0.16	-0.161	-0.273	-0.113	-0.128	-0.169	-0.124	-0.211	-0.178	-0.19	-0.144	-0.134	-0.108	-0.151	-0.166	-0.22	-0.34	-0.132	-0.154	-0.163	-0.224	-0.16	-0.185	-0.164	-0.149	-0.176	-0.132
cytokinesis\, contractile ring formation								-0.127	-0.16	-0.161	-0.273	-0.113	-0.128	-0.169	-0.124	4.734	-0.178	-0.19	-0.144	-0.134	-0.108	-0.151	-0.166	-0.22	-0.34	-0.132	-0.154	-0.163	-0.224	-0.16	-0.185	-0.164	-0.149	-0.176	-0.132
cytokinesis\, formation of actomyosin apparatus								-0.127	-0.16	-0.161	-0.273	-0.113	-0.128	-0.169	-0.124	4.734	-0.178	-0.19	-0.144	-0.134	-0.108	-0.151	-0.166	-0.22	-0.34	-0.132	-0.154	-0.163	-0.224	-0.16	-0.185	-0.164	-0.149	-0.176	-0.132
cytokinesis\, site selection	-0.408	1.173	2.531	2.322	3.521	-0.333	-0.479	-1.01	-1.264	-1.279	-0.651	-0.895	-0.004	-1.341	-0.979	0.222	-1.409	-1.508	-1.141	-1.057	-0.854	0.54	0.262	-1.137	-1.859	-0.062	-0.37	-1.293	-1.176	0.377	-0.03	0.302	0.564	-1.396	-1.046
cytoplasm	-0.274	-0.858	1.017	-1.079	-1.306	-0.224	-0.246	-2.041	-0.435	-1.463	-0.154	0.176	-4.379	-0.171	-0.027	-5.621	-0.008	0.777	-0.191	-0.415	-0.177	-2.47	-4.68	-0.8	-3.223	-2.103	-2.603	-1.41	-0.501	-2.953	-3.341	-3.091	-2.066	0.126	-2.097
cytoplasm organization and biogenesis	-0.644	0.17	0.78	4.371	1.137	0.508	3.387	-1.936	-2.423	-2.451	1.271	-1.716	4.038	-2.571	-1.878	22.954	-2.701	-2.892	-2.188	-2.027	-1.638	7.037	11.486	-1.383	-4.494	6.465	9.082	-2.048	-3.08	4.197	7.593	2.244	-1.799	-2.677	4.345
cytoplasmic dynein complex	-0.067	-0.211	-0.398	-0.265	-0.321	-0.055	-0.283	-0.221	-0.276	-0.28	-0.473	-0.196	-0.222	-0.293	-0.214	-0.366	-0.308	-0.33	-0.25	-0.231	-0.187	3.658	3.28	2.367	1.303	-0.229	-0.267	3.347	2.319	3.433	2.916	-0.284	-0.259	-0.305	-0.229
cytoplasmic exosome (RNase complex)								-0.404	-0.505	-0.511	1.63	-0.358	-0.406	-0.536	-0.391	4.027	-0.563	-0.603	-0.456	-0.423	-0.341	-0.477	-0.526	-0.697	-1.078	-0.418	-0.487	-0.517	-0.709	-0.505	-0.584	-0.519	-0.473	-0.558	-0.418
cytoplasmic membrane-bound vesicle	-0.34	1.85	-0.94	-1.339	0.979	-0.278	1.506	-1.267	-0.928	-0.953	-0.693	-0.206	-1.275	-1.06	-1.229	-2.1	-1.174	-1.335	-0.706	-0.546	-0.111	0.588	0.88	-1.702	-2.041	-1.312	-0.849	-0.335	-1.747	1.705	1.037	-1.63	-0.083	-1.752	-0.524
cytoplasmic microtubule	-0.117	-0.366	-0.69	-0.46	-0.557	-0.095	-0.49	1.982	-0.53	-0.536	0.283	-0.375	-0.426	-0.562	-0.411	0.791	-0.591	-0.632	-0.478	-0.443	-0.358	1.548	1.313	0.705	-0.141	-0.438	-0.511	1.355	0.671	1.409	1.079	-0.544	-0.496	-0.585	-0.439
cytoplasmic mRNA processing body	-0.078	-0.244	4.125	-0.306	-0.371	-0.064	-0.327	-0.338	-0.423	-0.427	-0.722	-0.299	-0.34	-0.448	-0.327	-0.559	-0.471	-0.504	-0.381	-0.353	-0.285	-0.399	-0.44	-0.583	-0.901	-0.35	-0.408	-0.432	-0.593	-0.423	-0.489	-0.434	-0.396	-0.467	-0.35
cytoplasmic vesicle	-0.34	1.85	-0.94	-1.339	0.979	-0.278	1.506	-1.267	-0.928	-0.953	-0.693	-0.206	-1.275	-1.06	-1.229	-2.1	-1.174	-1.335	-0.706	-0.546	-0.111	0.588	0.88	-1.702	-2.041	-1.312	-0.849	-0.335	-1.747	1.705	1.037	-1.63	-0.083	-1.752	-0.524
cytosine deaminase activity	-0.039	-0.122	-0.23	-0.153	-0.185	-0.032	-0.163	-0.127	-0.16	-0.161	-0.273	-0.113	-0.128	-0.169	-0.124	-0.211	-0.178	-0.19	-0.144	-0.134	-0.108	-0.151	-0.166	-0.22	-0.34	-0.132	-0.154	-0.163	-0.224	-0.16	-0.185	-0.164	-0.149	-0.176	-0.132
cytosine metabolism	-0.039	-0.122	-0.23	-0.153	-0.185	-0.032	-0.163	-0.127	-0.16	-0.161	-0.273	-0.113	-0.128	-0.169	-0.124	-0.211	-0.178	-0.19	-0.144	-0.134	-0.108	-0.151	-0.166	-0.22	-0.34	-0.132	-0.154	-0.163	-0.224	-0.16	-0.185	-0.164	-0.149	-0.176	-0.132
cytosine transport	-0.039	-0.122	-0.23	-0.153	-0.185	-0.032	-0.163	-0.127	-0.16	-0.161	-0.273	-0.113	-0.128	-0.169	-0.124	-0.211	-0.178	-0.19	-0.144	-0.134	-0.108	-0.151	-0.166	-0.22	-0.34	-0.132	-0.154	-0.163	-0.224	-0.16	-0.185	-0.164	-0.149	-0.176	-0.132
cytosine transporter activity	-0.039	-0.122	-0.23	-0.153	-0.185	-0.032	-0.163	-0.127	-0.16	-0.161	-0.273	-0.113	-0.128	-0.169	-0.124	-0.211	-0.178	-0.19	-0.144	-0.134	-0.108	-0.151	-0.166	-0.22	-0.34	-0.132	-0.154	-0.163	-0.224	-0.16	-0.185	-0.164	-0.149	-0.176	-0.132
cytosine-purine permease activity	-0.039	-0.122	-0.23	-0.153	-0.185	-0.032	-0.163	-0.127	-0.16	-0.161	-0.273	-0.113	-0.128	-0.169	-0.124	-0.211	-0.178	-0.19	-0.144	-0.134	-0.108	-0.151	-0.166	-0.22	-0.34	-0.132	-0.154	-0.163	-0.224	-0.16	-0.185	-0.164	-0.149	-0.176	-0.132
cytoskeletal protein binding	-0.26	4.241	0.552	5.055	6.372	-0.212	-0.135	-0.968	-1.211	-1.225	0.028	0.335	-0.974	-0.476	-0.939	-0.945	-1.35	-1.446	-0.15	-1.013	-0.819	-1.144	-1.262	-1.038	-1.275	-1.002	-1.169	-1.24	-1.701	-1.211	-1.401	-1.244	-0.223	-1.338	-1.003
cytoskeletal regulatory protein binding	-0.087	-0.272	-0.514	-0.343	2.081	-0.071	2.449	-0.285	-0.357	-0.361	-0.61	-0.253	-0.287	-0.379	-0.277	-0.473	-0.398	-0.426	-0.322	-0.299	-0.241	-0.337	-0.372	-0.493	-0.762	-0.295	-0.344	-0.365	-0.501	-0.357	-0.413	-0.367	-0.334	-0.394	-0.295
cytoskeleton	1.544	2.395	2.843	5.456	4.691	-0.415	1.376	-0.719	-1.866	-1.898	-0.879	-1.007	-1.869	-1.598	-1.215	-1.311	-2.177	-2.774	-1.593	-1.945	-1.571	-1.226	-1.54	-1.51	-2.853	-1.373	-1.768	-1.032	-1.255	-0.949	-1.887	-1.494	-1.2	-2.567	-0.824
cytoskeleton organization and biogenesis	1.908	0.143	2	3.143	4.517	-0.359	1.023	-1.617	-2.248	-2.685	-0.302	-1.88	-1.633	-2.432	-1.537	-0.386	-2.592	-3.168	-2.397	-2.221	-1.794	0.069	-0.03	-0.956	-2.968	0.24	-0.459	-1.126	-1.651	0.189	-0.234	-0.746	-0.755	-1.822	-0.736
cytoskeleton-dependent intracellular transport	-0.117	-0.366	0.839	-0.46	-0.557	-0.095	1.609	1.655	-0.598	-0.605	0.032	-0.423	-0.481	-0.634	-0.463	0.532	-0.666	-0.713	-0.54	-0.5	-0.404	1.251	1.031	0.448	-0.398	1.567	1.202	1.07	1.669	2.84	2.308	1.062	-0.56	-0.66	1.566
cytosol	-0.595	3.329	0.61	1.819	0.638	-0.486	0.115	-1.874	-2.18	-1.485	1.397	-1.028	-1.892	-1.333	0.122	-2.724	-1.579	-2.228	-0.579	0.214	-0.333	2.355	1.612	0.103	-1.107	1.164	1.045	-0.067	-0.572	0.801	0.843	-1.908	-1.145	-0.178	-0.621
cytosolic large ribosomal subunit (sensu Eukaryota)	-0.301	-0.942	-0.575	-1.185	-0.704	-0.246	-1.263	-1.142	-1.429	-1.446	2.468	-1.012	-1.149	-1.516	-1.107	-0.771	-1.593	-1.705	-1.29	-1.196	-0.966	0.958	0.612	-0.894	-2.677	2.311	2.389	-0.037	-2.006	2.212	1.523	-0.758	-0.563	-1.578	0.563
cytosolic ribosome (sensu Eukaryota)	-0.435	-1.36	-0.451	-1.094	-1.557	-0.355	-1.823	-1.6	-2.003	-1.505	3.362	-1.414	-1.61	-2.118	-0.871	-1.84	-2.233	-2.39	-1.802	-1.043	-1.349	2.562	1.968	-0.813	-2.929	2.787	2.451	-0.491	-1.658	2.74	2.28	-1.02	-0.743	-1.253	0.883
cytosolic small ribosomal subunit (sensu Eukaryota)	-0.274	-0.858	0.358	-0.119	-1.306	-0.224	-1.15	-0.993	-1.243	-0.433	1.966	-0.873	-1	-1.308	0.12	-1.645	-1.386	-1.483	-1.113	-0.033	-0.833	3.231	2.716	-0.48	-1.801	2.006	1.422	-0.438	0.08	2.093	2.2	-0.446	-0.259	0.146	0.996
D-alanyl-D-alanine endopeptidase activity	-0.039	-0.122	-0.23	-0.153	-0.185	-0.032	-0.163	-0.127	-0.16	-0.161	-0.273	-0.113	-0.128	-0.169	-0.124	-0.211	-0.178	-0.19	-0.144	-0.134	-0.108	-0.151	-0.166	-0.22	-0.34	-0.132	-0.154	-0.163	-0.224	-0.16	-0.185	-0.164	-0.149	-0.176	-0.132
damaged DNA binding	-0.183	-0.573	-1.08	-0.72	-0.872	-0.149	-0.768	-0.626	1.845	0.507	-0.533	1.278	0.99	0.412	-0.607	-0.026	-0.873	-0.935	0.742	0.904	1.389	-0.74	-0.816	-1.082	-0.331	-0.648	-0.756	-0.802	-1.1	-0.784	-0.906	-0.805	-0.734	-0.865	-0.649
D-amino acid catabolism	-0.039	-0.122	-0.23	-0.153	-0.185	-0.032	-0.163	-0.127	-0.16	-0.161	3.666	-0.113	-0.128	-0.169	-0.124	-0.211	-0.178	-0.19	-0.144	-0.134	-0.108	-0.151	-0.166	-0.22	-0.34	-0.132	-0.154	-0.163	-0.224	-0.16	-0.185	-0.164	-0.149	-0.176	-0.132
D-amino acid metabolism	-0.039	-0.122	-0.23	-0.153	-0.185	-0.032	-0.163	-0.127	-0.16	-0.161	3.666	-0.113	-0.128	-0.169	-0.124	-0.211	-0.178	-0.19	-0.144	-0.134	-0.108	-0.151	-0.166	-0.22	-0.34	-0.132	-0.154	-0.163	-0.224	-0.16	-0.185	-0.164	-0.149	-0.176	-0.132
D-arabinono-1\,4-lactone oxidase activity	-0.039	-0.122	-0.23	-0.153	-0.185	-0.032	-0.163	-0.127	-0.16	-0.161	-0.273	-0.113	-0.128	-0.169	-0.124	-0.211	-0.178	-0.19	-0.144	-0.134	-0.108	-0.151	-0.166	-0.22	-0.34	-0.132	-0.154	-0.163	-0.224	-0.16	-0.185	-0.164	-0.149	-0.176	-0.132
D-arabinose 1-dehydrogenase [NAD(P)+] activity	-0.039	-0.122	-0.23	-0.153	-0.185	-0.032	-0.163	-0.127	6.266	-0.161	-0.273	-0.113	-0.128	-0.169	-0.124	-0.211	5.621	-0.19	-0.144	-0.134	-0.108	-0.151	-0.166	-0.22	-0.34	-0.132	-0.154	-0.163	-0.224	-0.16	-0.185	-0.164	-0.149	-0.176	-0.132
DASH complex	-0.067	-0.211	2.249	-0.265	-0.321	-0.055	-0.283	-0.423	-0.53	-0.536	1.472	-0.375	-0.426	-0.562	-0.411	0.791	-0.591	-0.632	-0.478	-0.443	-0.358	-0.5	-0.552	-0.731	-1.13	-0.438	-0.511	-0.542	-0.744	-0.53	-0.613	-0.544	-0.496	-0.585	-0.439
dCMP deaminase activity								-0.127	-0.16	-0.161	3.666	-0.113	-0.128	-0.169	-0.124	-0.211	-0.178	-0.19	-0.144	-0.134	-0.108	-0.151	-0.166	-0.22	-0.34	-0.132	-0.154	-0.163	-0.224	-0.16	-0.185	-0.164	-0.149	-0.176	-0.132
deacetylase activity	-0.156	1.6	-0.921	-0.614	-0.743	-0.127	-0.654	1.275	0.78	0.756	0.619	1.565	1.26	0.657	1.347	0.214	0.556	0.419	0.999	1.169	1.685	-0.658	-0.726	-0.962	-1.487	-0.577	-0.672	-0.713	-0.978	-0.697	-0.806	-0.716	-0.653	-0.77	-0.577
deadenylylation-dependent decapping	-0.078	-0.244	4.125	-0.306	-0.371	-0.064	-0.327	-0.338	-0.423	-0.427	-0.722	-0.299	-0.34	-0.448	-0.327	-0.559	-0.471	-0.504	-0.381	-0.353	-0.285	-0.399	-0.44	-0.583	-0.901	-0.35	-0.408	-0.432	-0.593	-0.423	-0.489	-0.434	-0.396	-0.467	-0.35
deadenylylation-independent decapping	-0.039	-0.122	-0.23	-0.153	-0.185	-0.032	-0.163	-0.18	-0.226	-0.228	-0.386	-0.16	-0.181	-0.239	-0.175	-0.299	-0.252	-0.269	-0.204	-0.189	-0.153	-0.213	-0.235	-0.312	-0.482	-0.187	-0.218	-0.231	-0.317	-0.226	-0.261	-0.232	-0.211	-0.249	-0.187
deaminase activity	-0.103	-0.322	-0.608	-0.406	-0.491	-0.084	-0.432	-0.46	-0.576	-0.583	0.109	-0.408	-0.463	-0.611	-0.446	-0.763	-0.642	-0.687	-0.52	-0.482	-0.389	-0.544	-0.6	0.526	-0.319	1.663	1.29	-0.59	0.493	-0.576	-0.666	-0.592	1.36	-0.636	-0.477
death	-0.21	-0.658	0.467	0.417	-1.002	-0.172	-0.882	0.405	0.952	-1.05	0.666	0.652	-0.835	1.722	0.467	-1.374	1.537	1.289	-0.937	-0.869	-0.702	-0.98	-1.082	-1.433	0.324	-0.859	-1.002	-1.063	-0.005	-0.043	-1.201	-0.096	0.087	-1.147	-0.859
defense response	-0.055	-0.172	-0.325	-0.217	-0.262	-0.045	4.217	-0.18	-0.226	-0.228	-0.386	-0.16	-0.181	-0.239	-0.175	-0.299	-0.252	-0.269	-0.204	-0.189	-0.153	-0.213	-0.235	-0.312	-0.482	-0.187	-0.218	-0.231	-0.317	-0.226	-0.261	-0.232	-0.211	-0.249	-0.187
delta DNA polymerase activity	-0.039	-0.122	-0.23	-0.153	-0.185	-0.032	-0.163	-0.221	-0.276	-0.28	-0.473	-0.196	-0.222	-0.293	-0.214	-0.366	-0.308	-0.33	-0.25	-0.231	-0.187	-0.261	-0.288	-0.382	-0.59	-0.229	-0.267	-0.283	-0.388	-0.277	-0.32	-0.284	-0.259	-0.305	-0.229
delta DNA polymerase complex	-0.039	-0.122	-0.23	-0.153	-0.185	-0.032	-0.163	-0.255	-0.319	-0.323	-0.546	-0.226	-0.257	-0.339	-0.247	-0.423	-0.356	-0.381	-0.288	-0.267	-0.216	-0.301	-0.333	-0.441	-0.681	-0.264	-0.308	-0.327	-0.448	-0.319	-0.369	-0.328	-0.299	-0.353	-0.264
delta14-sterol reductase activity	-0.039	-0.122	-0.23	-0.153	-0.185	-0.032	-0.163	-0.127	-0.16	-0.161	3.666	-0.113	-0.128	-0.169	-0.124	-0.211	-0.178	-0.19	-0.144	-0.134	-0.108	-0.151	-0.166	-0.22	-0.34	-0.132	-0.154	-0.163	-0.224	-0.16	-0.185	-0.164	-0.149	-0.176	-0.132
delta24(24-1) sterol reductase activity	-0.039	-0.122	-0.23	6.528	5.392	-0.032	-0.163	-0.127	-0.16	-0.161	-0.273	-0.113	-0.128	-0.169	-0.124	-0.211	-0.178	-0.19	-0.144	-0.134	-0.108	-0.151	-0.166	-0.22	-0.34	-0.132	-0.154	6.123	-0.224	-0.16	-0.185	-0.164	-0.149	-0.176	-0.132
delta-DNA polymerase cofactor complex								-0.127	-0.16	-0.161	-0.273	-0.113	-0.128	-0.169	-0.124	-0.211	-0.178	-0.19	-0.144	-0.134	-0.108	-0.151	-0.166	-0.22	-0.34	-0.132	-0.154	-0.163	-0.224	-0.16	-0.185	-0.164	-0.149	-0.176	-0.132
deoxycytidine catabolism								-0.127	-0.16	-0.161	-0.273	-0.113	-0.128	-0.169	-0.124	-0.211	-0.178	-0.19	-0.144	-0.134	-0.108	-0.151	-0.166	-0.22	-0.34	-0.132	-0.154	-0.163	-0.224	-0.16	-0.185	-0.164	-0.149	-0.176	-0.132
deoxycytidine metabolism								-0.127	-0.16	-0.161	-0.273	-0.113	-0.128	-0.169	-0.124	-0.211	-0.178	-0.19	-0.144	-0.134	-0.108	-0.151	-0.166	-0.22	-0.34	-0.132	-0.154	-0.163	-0.224	-0.16	-0.185	-0.164	-0.149	-0.176	-0.132
deoxycytidyl transferase activity	-0.039	-0.122	-0.23	-0.153	-0.185	-0.032	-0.163	-0.127	-0.16	-0.161	-0.273	-0.113	-0.128	-0.169	-0.124	-0.211	-0.178	-0.19	-0.144	-0.134	-0.108	-0.151	-0.166	-0.22	-0.34	-0.132	-0.154	-0.163	-0.224	-0.16	-0.185	-0.164	-0.149	-0.176	-0.132
deoxyribodipyrimidine photo-lyase activity	-0.039	-0.122	-0.23	-0.153	-0.185	-0.032	-0.163	-0.127	-0.16	-0.161	-0.273	-0.113	-0.128	-0.169	-0.124	-0.211	-0.178	-0.19	-0.144	-0.134	-0.108	-0.151	-0.166	-0.22	-0.34	-0.132	-0.154	-0.163	-0.224	-0.16	-0.185	-0.164	-0.149	-0.176	-0.132
deoxyribonuclease activity	-0.151	-0.472	0.294	-0.594	-0.72	-0.123	-0.633	-0.526	-0.659	0.877	-0.17	-0.467	-0.53	-0.699	-0.511	-0.872	2.082	-0.786	-0.595	-0.551	1.833	-0.622	0.814	-0.91	0.186	-0.545	-0.636	-0.674	-0.925	-0.659	-0.762	-0.677	-0.617	-0.728	-0.545
deoxyribonucleoside catabolism								-0.127	-0.16	-0.161	-0.273	-0.113	-0.128	-0.169	-0.124	-0.211	-0.178	-0.19	-0.144	-0.134	-0.108	-0.151	-0.166	-0.22	-0.34	-0.132	-0.154	-0.163	-0.224	-0.16	-0.185	-0.164	-0.149	-0.176	-0.132
deoxyribonucleoside diphosphate biosynthesis								-0.127	-0.16	-0.161	-0.273	-0.113	-0.128	-0.169	-0.124	-0.211	-0.178	-0.19	-0.144	-0.134	-0.108	-0.151	-0.166	-0.22	-0.34	-0.132	-0.154	-0.163	-0.224	-0.16	-0.185	-0.164	-0.149	-0.176	-0.132
deoxyribonucleoside diphosphate metabolism	-0.039	-0.122	4.353	6.528	-0.185	-0.032	-0.163	-0.221	-0.276	-0.28	-0.473	-0.196	-0.222	-0.293	-0.214	-0.366	-0.308	-0.33	-0.25	-0.231	-0.187	-0.261	-0.288	5.115	3.196	-0.229	-0.267	-0.283	-0.388	-0.277	-0.32	-0.284	-0.259	-0.305	-0.229
deoxyribonucleoside metabolism								-0.221	-0.276	-0.28	-0.473	-0.196	-0.222	-0.293	-0.214	-0.366	-0.308	-0.33	-0.25	-0.231	-0.187	-0.261	-0.288	-0.382	-0.59	-0.229	-0.267	-0.283	-0.388	-0.277	-0.32	-0.284	-0.259	-0.305	-0.229
deoxyribonucleoside monophosphate biosynthesis	-0.055	-0.172	2.916	-0.217	-0.262	-0.045	-0.231	-0.221	-0.276	-0.28	-0.473	-0.196	-0.222	-0.293	-0.214	-0.366	-0.308	-0.33	-0.25	-0.231	-0.187	-0.261	-0.288	2.367	1.303	-0.229	-0.267	-0.283	-0.388	-0.277	-0.32	-0.284	-0.259	-0.305	-0.229
deoxyribonucleoside monophosphate metabolism	-0.055	-0.172	2.916	-0.217	-0.262	-0.045	-0.231	-0.221	-0.276	-0.28	-0.473	-0.196	-0.222	-0.293	-0.214	-0.366	-0.308	-0.33	-0.25	-0.231	-0.187	-0.261	-0.288	2.367	1.303	-0.229	-0.267	-0.283	-0.388	-0.277	-0.32	-0.284	-0.259	-0.305	-0.229
deoxyribonucleoside triphosphate biosynthesis								-0.127	-0.16	-0.161	-0.273	-0.113	-0.128	-0.169	-0.124	-0.211	-0.178	-0.19	-0.144	-0.134	-0.108	-0.151	-0.166	-0.22	-0.34	-0.132	-0.154	-0.163	-0.224	-0.16	-0.185	-0.164	-0.149	-0.176	-0.132
deoxyribonucleoside triphosphate catabolism								-0.127	-0.16	-0.161	-0.273	-0.113	-0.128	-0.169	-0.124	-0.211	-0.178	-0.19	-0.144	-0.134	-0.108	-0.151	-0.166	-0.22	-0.34	-0.132	-0.154	-0.163	-0.224	-0.16	-0.185	-0.164	-0.149	-0.176	-0.132
deoxyribonucleoside triphosphate metabolism								-0.18	-0.226	-0.228	-0.386	-0.16	-0.181	-0.239	-0.175	-0.299	-0.252	-0.269	-0.204	-0.189	-0.153	-0.213	-0.235	-0.312	-0.482	-0.187	-0.218	-0.231	-0.317	-0.226	-0.261	-0.232	-0.211	-0.249	-0.187
deoxyribonucleotide biosynthesis	-0.078	-0.244	1.833	-0.306	-0.371	-0.064	-0.327	-0.312	-0.391	-0.396	-0.668	-0.277	-0.314	-0.415	-0.303	-0.518	-0.436	-0.467	-0.353	-0.327	-0.264	-0.369	-0.408	3.348	1.843	-0.324	-0.377	2.167	-0.549	-0.391	-0.452	-0.402	-0.366	-0.432	-0.324
deoxyribonucleotide catabolism								-0.127	-0.16	-0.161	-0.273	-0.113	-0.128	-0.169	-0.124	-0.211	-0.178	-0.19	-0.144	-0.134	-0.108	-0.151	-0.166	-0.22	-0.34	-0.132	-0.154	-0.163	-0.224	-0.16	-0.185	-0.164	-0.149	-0.176	-0.132
deoxyribonucleotide metabolism	-0.087	-0.272	3.587	2.647	-0.415	-0.071	-0.365	-0.383	-0.479	-0.485	-0.819	-0.339	-0.385	-0.508	-0.371	-0.634	-0.534	-0.572	-0.433	-0.401	-0.324	-0.452	-0.499	5.689	3.351	-0.396	-0.462	1.607	-0.673	-0.479	-0.554	-0.492	-0.449	-0.529	-0.397
dephosphorylation	-0.203	0.974	0.572	1.781	0.11	-0.166	1.578	0.724	0.266	-0.901	-1.523	-0.631	-0.716	1.243	-0.69	-1.179	1.096	-0.083	-0.805	-0.745	-0.602	0.381	-0.929	-0.373	-1.311	-0.737	-0.86	0.22	-0.407	-0.891	-1.03	0.213	-0.834	-0.984	-0.738
D-erythro-sphingosine kinase activity	-0.055	-0.172	-0.325	-0.217	-0.262	-0.045	-0.231	-0.18	-0.226	-0.228	-0.386	-0.16	-0.181	-0.239	-0.175	-0.299	-0.252	-0.269	-0.204	-0.189	-0.153	-0.213	-0.235	-0.312	1.836	-0.187	-0.218	-0.231	-0.317	-0.226	-0.261	-0.232	-0.211	-0.249	-0.187
dethiobiotin synthase activity	-0.039	-0.122	-0.23	-0.153	-0.185	-0.032	-0.163	-0.127	-0.16	-0.161	-0.273	-0.113	-0.128	-0.169	-0.124	-0.211	-0.178	-0.19	-0.144	-0.134	-0.108	-0.151	-0.166	-0.22	-0.34	-0.132	-0.154	-0.163	-0.224	-0.16	-0.185	-0.164	-0.149	-0.176	-0.132
development	0.948	0.006	0.091	1.567	1.022	-0.544	-0.033	-0.284	-0.626	-0.689	-0.531	0.269	-0.313	-0.615	-1.048	-1.656	-0.584	-1.006	-1.241	-1.336	-1.064	-1.435	-0.851	-3.235	-1.745	-1.294	-1.895	-2.137	-2.291	-0.273	-1.119	-1.808	-1.022	-2.461	-1.72
di-\, tri-valent inorganic cation homeostasis	-0.238	-0.754	0.818	2.374	1.579	-0.197	1.08	-0.868	-1.087	-0.159	0.475	-0.77	0.299	-1.153	-0.842	-0.707	-0.353	-1.297	-0.981	-0.909	-0.735	0.983	0.697	0.613	3.019	-0.899	-1.049	-1.112	-0.832	1.767	2.062	-1.117	1.008	-0.335	-0.9
di-\, tri-valent inorganic cation transport	-0.221	-0.692	0.322	0.316	-0.063	-0.18	1.306	1.102	1.291	3.745	1.503	2.645	4.194	2.669	6.569	2.253	3.181	2.803	-0.185	1.963	5.307	3.278	2.76	2.036	2.519	-0.011	0.551	-0.438	1.338	8.018	8.111	2.833	6.905	1.701	0.996
di-\, tri-valent inorganic cation transporter activity	-0.285	-0.892	0.851	-0.199	0.183	-0.233	1.413	1.947	1.232	4.43	1.721	3.887	3.268	3.116	6.228	2.101	3.861	3.483	0.346	3.086	5.723	2.558	2.157	1.114	2.426	-0.784	-0.914	-0.969	0.26	4.5	5.556	1.151	4.913	0.937	-0.784
diacylglycerol binding								-0.127	-0.16	-0.161	-0.273	-0.113	-0.128	-0.169	-0.124	-0.211	-0.178	-0.19	-0.144	-0.134	-0.108	-0.151	-0.166	-0.22	-0.34	-0.132	-0.154	-0.163	-0.224	-0.16	-0.185	-0.164	-0.149	-0.176	-0.132
diacylglycerol cholinephosphotransferase activity	-0.039	-0.122	-0.23	-0.153	-0.185	-0.032	-0.163	-0.127	-0.16	-0.161	-0.273	-0.113	-0.128	-0.169	-0.124	-0.211	-0.178	-0.19	-0.144	-0.134	-0.108	-0.151	-0.166	-0.22	-0.34	-0.132	-0.154	-0.163	-0.224	-0.16	-0.185	-0.164	-0.149	-0.176	-0.132
diacylglycerol kinase activity	-0.055	-0.172	-0.325	-0.217	-0.262	-0.045	-0.231	-0.18	-0.226	-0.228	-0.386	-0.16	-0.181	-0.239	-0.175	-0.299	-0.252	-0.269	-0.204	-0.189	-0.153	-0.213	-0.235	-0.312	1.836	-0.187	-0.218	-0.231	-0.317	-0.226	-0.261	-0.232	-0.211	-0.249	-0.187
diacylglycerol O-acyltransferase activity	-0.039	-0.122	-0.23	-0.153	-0.185	-0.032	-0.163	-0.127	-0.16	-0.161	-0.273	-0.113	-0.128	-0.169	-0.124	-0.211	-0.178	-0.19	-0.144	-0.134	-0.108	-0.151	-0.166	-0.22	-0.34	-0.132	-0.154	-0.163	-0.224	-0.16	-0.185	-0.164	-0.149	-0.176	-0.132
diacylglycerol pyrophosphate phosphatase activity	-0.039	-0.122	-0.23	-0.153	-0.185	-0.032	-0.163	-0.127	-0.16	-0.161	-0.273	-0.113	-0.128	-0.169	-0.124	-0.211	-0.178	-0.19	-0.144	-0.134	-0.108	-0.151	-0.166	-0.22	-0.34	-0.132	-0.154	-0.163	-0.224	-0.16	-0.185	-0.164	-0.149	-0.176	-0.132
diadenosine polyphosphate metabolism	-0.039	-0.122	-0.23	-0.153	-0.185	-0.032	-0.163	-0.127	-0.16	-0.161	-0.273	-0.113	-0.128	-0.169	-0.124	-0.211	-0.178	-0.19	-0.144	-0.134	-0.108	-0.151	-0.166	-0.22	-0.34	-0.132	-0.154	-0.163	-0.224	-0.16	-0.185	-0.164	-0.149	-0.176	-0.132
diaminohydroxyphosphoribosylaminopyrimidine deaminase activity								-0.127	-0.16	-0.161	-0.273	-0.113	-0.128	-0.169	-0.124	-0.211	-0.178	-0.19	-0.144	-0.134	-0.108	-0.151	-0.166	-0.22	-0.34	-0.132	-0.154	-0.163	-0.224	-0.16	-0.185	-0.164	-0.149	-0.176	-0.132
dicarboxylic acid transport	-0.067	-0.211	-0.398	-0.265	-0.321	-0.055	-0.283	-0.221	-0.276	-0.28	-0.473	-0.196	-0.222	-0.293	-0.214	-0.366	-0.308	-0.33	-0.25	8.573	-0.187	-0.261	-0.288	-0.382	1.303	-0.229	-0.267	-0.283	-0.388	-0.277	-0.32	-0.284	-0.259	-0.305	-0.229
dicarboxylic acid transporter activity	-0.067	-0.211	-0.398	-0.265	-0.321	-0.055	-0.283	-0.221	-0.276	-0.28	-0.473	-0.196	-0.222	-0.293	-0.214	-0.366	-0.308	-0.33	-0.25	8.573	-0.187	-0.261	-0.288	-0.382	1.303	-0.229	-0.267	-0.283	-0.388	-0.277	-0.32	-0.284	-0.259	-0.305	-0.229
dihydrofolate reductase activity								-0.127	-0.16	-0.161	-0.273	-0.113	-0.128	-0.169	-0.124	-0.211	-0.178	-0.19	-0.144	-0.134	-0.108	-0.151	-0.166	-0.22	-0.34	-0.132	-0.154	-0.163	-0.224	-0.16	-0.185	-0.164	-0.149	-0.176	-0.132
dihydrofolate synthase activity								-0.127	-0.16	-0.161	-0.273	-0.113	-0.128	-0.169	-0.124	-0.211	-0.178	-0.19	-0.144	-0.134	-0.108	-0.151	-0.166	-0.22	-0.34	-0.132	-0.154	-0.163	-0.224	-0.16	-0.185	-0.164	-0.149	-0.176	-0.132
dihydrolipoamide S-acyltransferase activity	-0.039	-0.122	-0.23	-0.153	-0.185	-0.032	-0.163	-0.127	-0.16	-0.161	-0.273	-0.113	-0.128	-0.169	-0.124	-0.211	-0.178	-0.19	-0.144	-0.134	-0.108	-0.151	-0.166	-0.22	-0.34	-0.132	-0.154	-0.163	-0.224	-0.16	-0.185	-0.164	-0.149	-0.176	-0.132
dihydrolipoyl dehydrogenase activity	-0.039	-0.122	-0.23	-0.153	-0.185	-0.032	-0.163	-0.127	-0.16	-0.161	-0.273	-0.113	-0.128	-0.169	-0.124	-0.211	-0.178	-0.19	-0.144	-0.134	-0.108	-0.151	-0.166	-0.22	-0.34	-0.132	-0.154	-0.163	-0.224	-0.16	-0.185	-0.164	-0.149	-0.176	-0.132
dihydrolipoyllysine-residue acetyltransferase activity	-0.039	-0.122	-0.23	-0.153	-0.185	-0.032	-0.163	-0.127	-0.16	-0.161	-0.273	-0.113	-0.128	-0.169	-0.124	-0.211	-0.178	-0.19	-0.144	-0.134	-0.108	-0.151	-0.166	-0.22	-0.34	-0.132	-0.154	-0.163	-0.224	-0.16	-0.185	-0.164	-0.149	-0.176	-0.132
dihydrolipoyllysine-residue succinyltransferase activity	-0.039	-0.122	-0.23	-0.153	-0.185	-0.032	-0.163	-0.127	-0.16	-0.161	-0.273	-0.113	-0.128	-0.169	-0.124	-0.211	-0.178	-0.19	-0.144	-0.134	-0.108	-0.151	-0.166	-0.22	-0.34	-0.132	-0.154	-0.163	-0.224	-0.16	-0.185	-0.164	-0.149	-0.176	-0.132
dihydroneopterin aldolase activity								-0.127	-0.16	-0.161	-0.273	-0.113	-0.128	-0.169	-0.124	-0.211	-0.178	-0.19	-0.144	-0.134	-0.108	-0.151	-0.166	4.539	2.937	-0.132	-0.154	-0.163	-0.224	-0.16	-0.185	-0.164	-0.149	-0.176	-0.132
dihydroorotase activity	-0.039	-0.122	-0.23	-0.153	-0.185	-0.032	-0.163	-0.127	-0.16	-0.161	3.666	-0.113	-0.128	-0.169	-0.124	-0.211	-0.178	-0.19	-0.144	-0.134	-0.108	-0.151	-0.166	-0.22	-0.34	-0.132	-0.154	-0.163	-0.224	-0.16	-0.185	-0.164	-0.149	-0.176	-0.132
dihydroorotate dehydrogenase activity	-0.039	-0.122	-0.23	-0.153	-0.185	-0.032	-0.163	-0.127	-0.16	-0.161	-0.273	-0.113	-0.128	-0.169	-0.124	-0.211	-0.178	-0.19	-0.144	-0.134	-0.108	-0.151	-0.166	-0.22	-0.34	-0.132	-0.154	-0.163	-0.224	-0.16	-0.185	-0.164	-0.149	-0.176	-0.132
dihydroorotate oxidase activity	-0.039	-0.122	-0.23	-0.153	-0.185	-0.032	-0.163	-0.127	-0.16	-0.161	-0.273	-0.113	-0.128	-0.169	-0.124	-0.211	-0.178	-0.19	-0.144	-0.134	-0.108	-0.151	-0.166	-0.22	-0.34	-0.132	-0.154	-0.163	-0.224	-0.16	-0.185	-0.164	-0.149	-0.176	-0.132
dihydropteroate synthase activity								-0.127	-0.16	-0.161	-0.273	-0.113	-0.128	-0.169	-0.124	-0.211	-0.178	-0.19	-0.144	-0.134	-0.108	-0.151	-0.166	4.539	2.937	-0.132	-0.154	-0.163	-0.224	-0.16	-0.185	-0.164	-0.149	-0.176	-0.132
dihydroxy-acid dehydratase activity								-0.127	-0.16	-0.161	-0.273	-0.113	-0.128	-0.169	-0.124	-0.211	-0.178	-0.19	-0.144	-0.134	-0.108	-0.151	-0.166	-0.22	-0.34	-0.132	-0.154	-0.163	-0.224	-0.16	-0.185	-0.164	-0.149	-0.176	-0.132
dimethylallyltranstransferase activity								-0.127	-0.16	-0.161	3.666	-0.113	-0.128	-0.169	-0.124	-0.211	-0.178	-0.19	-0.144	-0.134	-0.108	-0.151	-0.166	-0.22	-0.34	-0.132	-0.154	-0.163	-0.224	-0.16	-0.185	-0.164	-0.149	-0.176	-0.132
dioxygenase activity	-0.095	-0.298	-0.563	-0.375	-0.455	-0.078	-0.4	-0.312	-0.391	-0.396	-0.668	-0.277	-0.314	-0.415	-0.303	-0.518	-0.436	1.756	2.54	2.786	-0.264	-0.369	-0.408	1.404	1.843	-0.324	-0.377	-0.4	-0.549	-0.391	-0.452	-0.402	2.428	-0.432	-0.324
dipeptidyl-peptidase activity	-0.067	-0.211	-0.398	-0.265	-0.321	-0.055	-0.283	-0.221	-0.276	-0.28	1.802	-0.196	-0.222	-0.293	-0.214	-0.366	-0.308	-0.33	-0.25	-0.231	-0.187	-0.261	-0.288	-0.382	-0.59	-0.229	-0.267	-0.283	-0.388	-0.277	-0.32	-0.284	-0.259	-0.305	-0.229
dipeptidyl-peptidase and tripeptidyl-peptidase activity	-0.067	-0.211	-0.398	-0.265	-0.321	-0.055	-0.283	-0.221	-0.276	-0.28	1.802	-0.196	-0.222	-0.293	-0.214	-0.366	-0.308	-0.33	-0.25	-0.231	-0.187	-0.261	-0.288	-0.382	-0.59	-0.229	-0.267	-0.283	-0.388	-0.277	-0.32	-0.284	-0.259	-0.305	-0.229
dipeptidyl-peptidase III activity	-0.039	-0.122	-0.23	-0.153	-0.185	-0.032	-0.163	-0.127	-0.16	-0.161	3.666	-0.113	-0.128	-0.169	-0.124	-0.211	-0.178	-0.19	-0.144	-0.134	-0.108	-0.151	-0.166	-0.22	-0.34	-0.132	-0.154	-0.163	-0.224	-0.16	-0.185	-0.164	-0.149	-0.176	-0.132
dipeptidyl-peptidase IV activity	-0.055	-0.172	-0.325	-0.217	-0.262	-0.045	-0.231	-0.18	-0.226	-0.228	-0.386	-0.16	-0.181	-0.239	-0.175	-0.299	-0.252	-0.269	-0.204	-0.189	-0.153	-0.213	-0.235	-0.312	-0.482	-0.187	-0.218	-0.231	-0.317	-0.226	-0.261	-0.232	-0.211	-0.249	-0.187
diphosphoinositol-polyphosphate diphosphatase activity	-0.039	-0.122	-0.23	-0.153	-0.185	-0.032	-0.163	-0.127	-0.16	-0.161	-0.273	-0.113	-0.128	-0.169	-0.124	-0.211	-0.178	-0.19	-0.144	-0.134	-0.108	-0.151	-0.166	-0.22	-0.34	-0.132	-0.154	-0.163	-0.224	-0.16	-0.185	-0.164	-0.149	-0.176	-0.132
diphosphomevalonate decarboxylase activity								-0.127	-0.16	-0.161	3.666	-0.113	-0.128	-0.169	-0.124	-0.211	-0.178	-0.19	-0.144	-0.134	-0.108	-0.151	-0.166	-0.22	-0.34	-0.132	-0.154	-0.163	-0.224	-0.16	-0.185	-0.164	-0.149	-0.176	-0.132
diphosphotransferase activity	-0.067	-0.211	-0.398	-0.265	-0.321	-0.055	-0.283	-0.338	-0.423	-0.427	0.768	-0.299	-0.34	-0.448	-0.327	1.311	-0.471	-0.504	-0.381	-0.353	-0.285	-0.399	-0.44	1.217	0.338	-0.35	-0.408	-0.432	-0.593	-0.423	-0.489	-0.434	-0.396	-0.467	-0.35
diphthine synthase activity	-0.039	-0.122	-0.23	-0.153	-0.185	-0.032	-0.163	-0.127	-0.16	-0.161	-0.273	-0.113	-0.128	-0.169	-0.124	-0.211	-0.178	-0.19	-0.144	-0.134	-0.108	-0.151	-0.166	-0.22	-0.34	-0.132	-0.154	-0.163	-0.224	-0.16	-0.185	-0.164	-0.149	-0.176	-0.132
disaccharide biosynthesis	-0.067	4.602	-0.398	3.593	-0.321	-0.055	-0.283	-0.221	-0.276	-0.28	-0.473	-0.196	-0.222	-0.293	-0.214	-0.366	-0.308	-0.33	-0.25	-0.231	-0.187	-0.261	-0.288	-0.382	1.303	-0.229	-0.267	-0.283	5.025	-0.277	-0.32	-0.284	-0.259	-0.305	-0.229
disaccharide catabolism	-0.067	-0.211	-0.398	-0.265	-0.321	-0.055	-0.283	-0.221	-0.276	-0.28	-0.473	-0.196	-0.222	-0.293	-0.214	-0.366	-0.308	-0.33	-0.25	-0.231	-0.187	-0.261	-0.288	-0.382	1.303	-0.229	-0.267	-0.283	-0.388	-0.277	-0.32	-0.284	-0.259	-0.305	-0.229
disaccharide metabolism	-0.146	4.006	-0.861	1.214	-0.695	-0.119	-0.612	6.77	5.209	5.137	0.619	3.624	3.081	2.053	3.234	1.35	4.554	5.42	4.255	2.921	3.841	0.902	-0.726	-0.962	2.279	1.194	-0.672	0.732	2.253	0.779	0.482	-0.716	-0.653	-0.77	-0.577
disaccharide transport	-0.039	-0.122	-0.23	-0.153	-0.185	-0.032	-0.163	7.843	6.266	6.194	-0.273	-0.113	-0.128	-0.169	-0.124	-0.211	5.621	5.251	6.94	-0.134	-0.108	-0.151	-0.166	-0.22	-0.34	-0.132	-0.154	-0.163	-0.224	-0.16	-0.185	-0.164	-0.149	-0.176	-0.132
disaccharide transporter activity	-0.039	-0.122	-0.23	-0.153	-0.185	-0.032	-0.163	5.456	4.318	4.266	-0.386	-0.16	-0.181	-0.239	-0.175	-0.299	3.849	3.578	4.806	-0.189	-0.153	-0.213	-0.235	-0.312	-0.482	-0.187	-0.218	-0.231	-0.317	-0.226	-0.261	-0.232	-0.211	-0.249	-0.187
disulfide oxidoreductase activity	-0.156	-0.488	-0.921	-0.614	-0.743	-0.127	-0.654	1.41	2.462	-0.667	-1.126	-0.467	-0.53	-0.699	-0.511	-0.872	2.082	3.179	-0.595	1.3	-0.445	-0.622	-0.687	2.558	3.371	-0.545	-0.636	-0.674	0.213	-0.659	-0.762	-0.677	-0.617	0.693	-0.545
D-lactaldehyde dehydrogenase activity	-0.039	-0.122	-0.23	-0.153	-0.185	-0.032	-0.163	-0.127	-0.16	-0.161	-0.273	-0.113	-0.128	-0.169	-0.124	-0.211	-0.178	-0.19	-0.144	-0.134	-0.108	-0.151	-0.166	4.539	2.937	-0.132	6.495	6.123	4.463	-0.16	5.419	-0.164	6.691	-0.176	7.57
D-lactate dehydrogenase (cytochrome) activity	-0.067	-0.211	-0.398	-0.265	-0.321	-0.055	-0.283	-0.221	-0.276	-0.28	-0.473	-0.196	-0.222	-0.293	-0.214	-0.366	-0.308	-0.33	-0.25	-0.231	-0.187	-0.261	-0.288	2.367	1.303	-0.229	-0.267	3.347	2.319	-0.277	-0.32	3.333	3.691	3.072	4.219
DNA alkylation	-0.039	-0.122	-0.23	-0.153	-0.185	-0.032	-0.163	-0.127	-0.16	-0.161	-0.273	-0.113	-0.128	-0.169	-0.124	4.734	-0.178	-0.19	-0.144	-0.134	-0.108	-0.151	6.013	-0.22	-0.34	-0.132	-0.154	-0.163	-0.224	-0.16	-0.185	-0.164	-0.149	-0.176	-0.132
DNA bending activity	-0.078	-0.244	1.833	-0.306	-0.371	-0.064	-0.327	-0.338	-0.423	-0.427	-0.722	-0.299	2.656	-0.448	-0.327	1.311	-0.471	-0.504	-0.381	2.53	-0.285	-0.399	-0.44	-0.583	0.338	-0.35	-0.408	-0.432	-0.593	-0.423	-0.489	-0.434	-0.396	-0.467	-0.35
DNA binding	0.725	0.05	0.839	-2.167	-1.318	-0.607	-1.326	-1.027	-0.906	-0.978	-2.695	-0.886	-1.057	-0.989	-0.881	-1.784	-1.873	-2.038	-0.943	-0.884	-0.686	-0.221	1.198	-0.288	0.632	0.647	1.545	1.354	-0.894	0.322	1.114	1.62	0.161	-0.698	0.276
DNA catabolism	9.633	-0.322	-0.608	2.122	-0.491	-0.084	-0.432	-0.383	-0.479	-0.485	-0.819	-0.339	-0.385	-0.508	-0.371	-0.634	1.4	-0.572	-0.433	-0.401	-0.324	-0.452	1.562	-0.661	0.071	-0.396	-0.462	-0.49	-0.673	1.664	-0.554	-0.492	-0.449	-0.529	-0.397
DNA catabolism\, endonucleolytic	14.797	-0.211	-0.398	3.593	-0.321	-0.055	-0.283	-0.338	-0.423	-0.427	-0.722	-0.299	-0.34	-0.448	-0.327	-0.559	1.722	-0.504	-0.381	-0.353	-0.285	-0.399	-0.44	-0.583	0.338	-0.35	-0.408	-0.432	-0.593	-0.423	-0.489	-0.434	-0.396	-0.467	-0.35
DNA catabolism\, exonucleolytic	8.472	-0.366	-0.69	1.769	-0.557	-0.095	-0.49	-0.221	-0.276	-0.28	-0.473	-0.196	-0.222	-0.293	-0.214	-0.366	-0.308	-0.33	-0.25	-0.231	-0.187	-0.261	-0.288	-0.382	-0.59	-0.229	-0.267	-0.283	-0.388	3.433	-0.32	-0.284	-0.259	-0.305	-0.229
DNA clamp loader activity	-0.039	-0.122	-0.23	-0.153	-0.185	-0.032	-0.163	-0.312	-0.391	-0.396	0.94	-0.277	-0.314	-0.415	-0.303	1.502	-0.436	1.756	-0.353	-0.327	-0.264	-0.369	-0.408	1.404	0.504	2.823	2.338	2.167	1.365	-0.391	1.836	2.156	-0.366	1.957	2.822
DNA damage checkpoint	-0.117	-0.366	-0.69	-0.46	1.304	-0.095	-0.49	-0.423	-0.53	-0.536	-0.906	-0.375	-0.426	-0.562	-0.411	-0.701	-0.591	-0.632	-0.478	-0.443	-0.358	-0.5	-0.552	-0.731	-1.13	-0.438	-0.511	-0.542	-0.744	-0.53	-0.613	-0.544	-0.496	-0.585	-0.439
DNA damage response\, signal transduction	-0.039	-0.122	4.353	-0.153	-0.185	-0.032	-0.163	-0.442	-0.553	-0.56	-0.946	-0.392	-0.445	-0.587	-0.429	-0.733	-0.617	-0.66	-0.5	-0.463	-0.374	-0.523	-0.577	-0.764	-1.181	-0.458	-0.534	-0.566	-0.777	-0.554	-0.64	-0.569	-0.518	-0.611	-0.458
DNA damage response\, signal transduction resulting in induction of apoptosis	-0.123	-0.385	0.724	-0.485	1.179	-0.101	-0.517	-0.127	-0.16	-0.161	-0.273	-0.113	-0.128	-0.169	-0.124	-0.211	-0.178	-0.19	-0.144	-0.134	-0.108	-0.151	-0.166	-0.22	-0.34	-0.132	-0.154	-0.163	-0.224	-0.16	-0.185	-0.164	-0.149	-0.176	-0.132
DNA dealkylation	-0.067	-0.211	-0.398	-0.265	-0.321	-0.055	-0.283	-0.221	-0.276	-0.28	-0.473	-0.196	-0.222	3.215	-0.214	-0.366	-0.308	2.812	3.841	-0.231	-0.187	-0.261	-0.288	-0.382	-0.59	-0.229	-0.267	-0.283	-0.388	-0.277	-0.32	-0.284	-0.259	-0.305	-0.229
DNA double-strand break processing	14.797	-0.211	-0.398	3.593	-0.321	-0.055	-0.283	-0.221	-0.276	-0.28	-0.473	-0.196	-0.222	-0.293	-0.214	-0.366	-0.308	-0.33	-0.25	-0.231	-0.187	-0.261	-0.288	-0.382	-0.59	-0.229	-0.267	-0.283	-0.388	3.433	-0.32	-0.284	-0.259	-0.305	-0.229
DNA helicase activity	-0.135	-0.422	0.528	-0.531	-0.643	-0.11	-0.566	-0.676	0.371	-0.857	-1.447	-0.6	-0.681	-0.898	-0.656	-1.121	-0.944	-1.01	-0.764	-0.708	-0.572	-0.799	-0.882	-0.267	4.404	-0.701	-0.817	-0.866	-1.189	-0.847	-0.979	-0.87	-0.793	-0.935	-0.701
DNA helicase IV activity								-0.18	-0.226	-0.228	-0.386	-0.16	-0.181	-0.239	-0.175	-0.299	-0.252	-0.269	-0.204	-0.189	-0.153	-0.213	-0.235	-0.312	-0.482	-0.187	-0.218	-0.231	-0.317	-0.226	-0.261	-0.232	-0.211	-0.249	-0.187
DNA integrity checkpoint	-0.135	-0.422	-0.797	-0.531	0.969	-0.11	-0.566	-0.494	-0.619	-0.626	-1.058	-0.438	-0.498	-0.657	-0.48	-0.819	-0.69	-0.739	-0.559	-0.518	-0.418	-0.584	-0.645	-0.854	-1.32	-0.512	-0.597	-0.633	-0.869	-0.619	-0.716	-0.636	-0.58	-0.684	-0.512
DNA ligase (ATP) activity	-0.039	-0.122	-0.23	-0.153	-0.185	-0.032	-0.163	-0.18	-0.226	-0.228	-0.386	-0.16	-0.181	-0.239	-0.175	-0.299	-0.252	-0.269	-0.204	-0.189	-0.153	-0.213	-0.235	-0.312	-0.482	-0.187	-0.218	-0.231	-0.317	-0.226	-0.261	-0.232	-0.211	-0.249	-0.187
DNA ligase activity	-0.039	-0.122	-0.23	-0.153	-0.185	-0.032	-0.163	-0.18	-0.226	-0.228	-0.386	-0.16	-0.181	-0.239	-0.175	-0.299	-0.252	-0.269	-0.204	-0.189	-0.153	-0.213	-0.235	-0.312	-0.482	-0.187	-0.218	-0.231	-0.317	-0.226	-0.261	-0.232	-0.211	-0.249	-0.187
DNA ligation								-0.127	-0.16	-0.161	-0.273	-0.113	-0.128	-0.169	-0.124	-0.211	-0.178	-0.19	-0.144	-0.134	-0.108	-0.151	-0.166	-0.22	-0.34	-0.132	-0.154	-0.163	-0.224	-0.16	-0.185	-0.164	-0.149	-0.176	-0.132
DNA metabolism	3.862	1.721	3.125	0.362	-2.073	1.286	-0.007	-1.667	-1.664	-0.166	-0.665	-1.2	-1.693	-1.983	-1.949	-2.522	-1.972	-2.374	-1.124	-1.104	-1.022	-2.358	-2.189	-1.872	-0.669	-1.429	-2.452	-1.171	-3.841	-1.98	-2.461	-1.501	-1.987	-2.779	-1.431
DNA methylation	-0.039	-0.122	-0.23	-0.153	-0.185	-0.032	-0.163	-0.127	-0.16	-0.161	-0.273	-0.113	-0.128	-0.169	-0.124	4.734	-0.178	-0.19	-0.144	-0.134	-0.108	-0.151	6.013	-0.22	-0.34	-0.132	-0.154	-0.163	-0.224	-0.16	-0.185	-0.164	-0.149	-0.176	-0.132
DNA modification	-0.055	-0.172	2.916	-0.217	-0.262	-0.045	-0.231	-0.18	-0.226	-0.228	-0.386	-0.16	-0.181	-0.239	-0.175	3.198	-0.252	-0.269	-0.204	-0.189	-0.153	-0.213	4.135	3.054	1.836	-0.187	-0.218	-0.231	-0.317	-0.226	-0.261	-0.232	-0.211	-0.249	-0.187
DNA N-glycosylase activity	-0.095	-0.298	-0.563	-0.375	-0.455	-0.078	-0.4	-0.312	-0.391	-0.396	-0.668	-0.277	-0.314	2.067	-0.303	-0.518	-0.436	1.756	2.54	-0.327	-0.264	-0.369	-0.408	-0.54	0.504	-0.324	-0.377	-0.4	-0.549	-0.391	-0.452	-0.402	-0.366	-0.432	-0.324
DNA packaging	1.824	4.479	4.212	-1.79	-1.179	2.419	-0.237	-1.226	-0.855	0.498	1.315	-0.949	-1.241	-1.958	-0.553	-2.636	-2.1	-1.906	-1.526	-0.779	-1.53	-1.642	-1.908	-3.126	-3.153	-1.874	-2.185	-2.317	-2.836	-1.325	-2.208	-0.952	-1.12	-2.501	-1.874
DNA photolyase activity	-0.039	-0.122	-0.23	-0.153	-0.185	-0.032	-0.163	-0.127	-0.16	-0.161	-0.273	-0.113	-0.128	-0.169	-0.124	-0.211	-0.178	-0.19	-0.144	-0.134	-0.108	-0.151	-0.166	-0.22	-0.34	-0.132	-0.154	-0.163	-0.224	-0.16	-0.185	-0.164	-0.149	-0.176	-0.132
DNA polymerase complex	-0.087	-0.272	-0.514	-0.343	-0.415	-0.071	-0.365	-0.404	-0.505	-0.511	-0.863	-0.358	-0.406	-0.536	-0.391	-0.669	-0.563	-0.603	-0.456	-0.423	-0.341	-0.477	-0.526	-0.697	-1.078	-0.418	-0.487	-0.517	-0.709	-0.505	-0.584	-0.519	-0.473	-0.558	-0.418
DNA polymerase processivity factor activity								-0.127	-0.16	-0.161	-0.273	-0.113	-0.128	-0.169	-0.124	-0.211	-0.178	-0.19	-0.144	-0.134	-0.108	-0.151	-0.166	-0.22	-0.34	-0.132	-0.154	-0.163	-0.224	-0.16	-0.185	-0.164	-0.149	-0.176	-0.132
DNA primase activity								-0.18	-0.226	-0.228	-0.386	-0.16	-0.181	-0.239	-0.175	-0.299	-0.252	-0.269	-0.204	-0.189	-0.153	-0.213	-0.235	-0.312	-0.482	-0.187	-0.218	-0.231	-0.317	-0.226	-0.261	-0.232	-0.211	-0.249	-0.187
DNA recombinase assembly	-0.055	-0.172	-0.325	-0.217	-0.262	-0.045	-0.231	-0.18	-0.226	-0.228	-0.386	-0.16	-0.181	-0.239	-0.175	-0.299	-0.252	-0.269	-0.204	-0.189	-0.153	-0.213	-0.235	-0.312	-0.482	-0.187	-0.218	-0.231	-0.317	-0.226	-0.261	-0.232	-0.211	-0.249	-0.187
DNA recombination	5.972	-1.013	-0.229	1.995	-1.542	-0.264	0.181	-0.418	-0.224	-0.257	-1.029	-1.106	-1.255	-0.392	-1.21	-1.037	0.673	-1.297	0.065	-0.513	-0.079	-1.474	-0.984	-0.174	2.809	-0.49	-1.506	1.019	-1.216	-0.893	-1.805	-1.604	-1.462	-1.116	-0.491
DNA repair	2.141	-1.264	-0.119	0.392	-1.374	-0.33	0.171	-0.924	-0.386	-0.953	-2.41	0.08	-0.938	-0.594	-1.536	-1.396	-1.73	-1.014	-0.03	-1.027	-0.563	-1.872	-2.066	-1.555	0.385	-1.64	-1.913	-2.029	-2.395	-1.451	-2.292	-1.518	-1.857	-2.19	-1.641
DNA replication	-0.067	-0.211	-0.398	-0.265	-0.321	-0.055	-0.283	-1.448	-1.813	-1.261	-1.323	-1.284	-0.743	-1.923	-1.405	-1.062	-1.498	-1.182	-1.637	-0.829	-0.379	-0.488	-0.775	1.359	0.269	1.279	0.049	0.979	-1.7	-0.655	-0.075	-0.168	-0.464	-0.42	0.583
DNA replication and chromosome cycle	-0.067	-0.211	-0.398	-0.265	-0.321	-0.055	-0.283	-0.312	-0.391	-0.396	0.94	-0.277	-0.314	-0.415	-0.303	-0.518	-0.436	-0.467	-0.353	-0.327	-0.264	-0.369	-0.408	-0.54	-0.834	-0.324	-0.377	-0.4	-0.549	-0.391	-0.452	-0.402	-0.366	-0.432	-0.324
DNA replication checkpoint	-0.087	-0.272	-0.514	-0.343	-0.415	-0.071	-0.365	-0.285	-0.357	-0.361	-0.61	-0.253	-0.287	-0.379	-0.277	-0.473	-0.398	-0.426	-0.322	-0.299	-0.241	-0.337	-0.372	-0.493	-0.762	-0.295	-0.344	-0.365	-0.501	-0.357	-0.413	-0.367	-0.334	-0.394	-0.295
DNA replication factor A complex								-0.221	-0.276	-0.28	-0.473	-0.196	-0.222	-0.293	-0.214	-0.366	-0.308	-0.33	-0.25	-0.231	-0.187	-0.261	-0.288	-0.382	1.303	-0.229	-0.267	-0.283	-0.388	-0.277	-0.32	-0.284	-0.259	-0.305	-0.229
DNA replication factor C complex	-0.319	-0.997	0.962	1.233	-0.827	-0.26	-1.337	-0.423	-0.53	-0.536	0.283	-0.375	-0.426	-0.562	-0.411	0.791	-0.591	1.01	-0.478	-0.443	-0.358	-0.5	-0.552	-0.731	-1.13	-0.438	-0.511	-0.542	-0.744	-0.53	-0.613	-0.544	-0.496	-0.585	-0.439
DNA replication initiation								-0.639	-0.8	-0.809	-1.367	-0.567	-0.643	-0.848	-0.62	-1.059	-0.892	-0.954	-0.722	-0.669	-0.54	0.605	-0.833	-0.15	-1.049	-0.662	-0.772	-0.818	-1.123	-0.8	0.198	-0.822	-0.749	-0.883	-0.662
DNA replication origin binding								-0.338	-0.423	-0.427	-0.722	-0.299	-0.34	-0.448	-0.327	-0.559	-0.471	-0.504	-0.381	-0.353	-0.285	-0.399	-0.44	-0.583	-0.901	-0.35	-0.408	-0.432	-0.593	-0.423	-0.489	-0.434	-0.396	-0.467	-0.35
DNA replication\, synthesis of RNA primer								-0.338	-0.423	-0.427	-0.722	-0.299	-0.34	-0.448	-0.327	-0.559	-0.471	-0.504	-0.381	-0.353	-0.285	-0.399	-0.44	-0.583	0.338	-0.35	-0.408	-0.432	-0.593	-0.423	-0.489	-0.434	-0.396	-0.467	-0.35
DNA secondary structure binding								-0.18	-0.226	-0.228	-0.386	-0.16	-0.181	-0.239	-0.175	-0.299	-0.252	-0.269	-0.204	-0.189	-0.153	-0.213	-0.235	-0.312	-0.482	-0.187	-0.218	-0.231	-0.317	-0.226	-0.261	-0.232	-0.211	-0.249	-0.187
DNA strand annealing activity	-0.039	-0.122	-0.23	-0.153	-0.185	-0.032	-0.163	-0.127	-0.16	-0.161	-0.273	-0.113	-0.128	-0.169	-0.124	-0.211	-0.178	-0.19	-0.144	-0.134	-0.108	-0.151	-0.166	4.539	2.937	-0.132	-0.154	-0.163	4.463	-0.16	-0.185	-0.164	-0.149	-0.176	-0.132
DNA strand elongation	-0.087	-0.272	-0.514	-0.343	-0.415	-0.071	-0.365	-0.688	-0.862	-0.872	-0.739	-0.61	-0.693	-0.914	-0.668	-0.22	-0.961	-0.015	-0.778	-0.721	-0.582	-0.814	-0.898	-1.19	-0.618	-0.713	-0.831	-0.882	-1.21	-0.862	-0.996	-0.885	-0.807	-0.952	-0.713
DNA synthesis during DNA repair	-0.039	-0.122	4.353	-0.153	-0.185	-0.032	-0.163	-0.255	-0.319	-0.323	-0.546	-0.226	-0.257	-0.339	-0.247	-0.423	-0.356	-0.381	-0.288	-0.267	-0.216	-0.301	-0.333	-0.441	-0.681	-0.264	-0.308	-0.327	-0.448	-0.319	-0.369	-0.328	-0.299	-0.353	-0.264
DNA topoisomerase (ATP-hydrolyzing) activity	-0.039	-0.122	-0.23	-0.153	-0.185	-0.032	-0.163	-0.18	-0.226	-0.228	-0.386	-0.16	-0.181	-0.239	-0.175	-0.299	3.849	-0.269	-0.204	-0.189	-0.153	-0.213	-0.235	-0.312	-0.482	-0.187	-0.218	-0.231	-0.317	-0.226	-0.261	-0.232	-0.211	-0.249	-0.187
DNA topoisomerase activity	-0.087	-0.272	1.537	-0.343	-0.415	-0.071	-0.365	-0.312	-0.391	-0.396	-0.668	-0.277	-0.314	-0.415	-0.303	-0.518	1.933	-0.467	-0.353	-0.327	-0.264	-0.369	-0.408	1.404	3.182	-0.324	-0.377	-0.4	-0.549	-0.391	-0.452	-0.402	-0.366	-0.432	-0.324
DNA topoisomerase type I activity	-0.055	-0.172	2.916	-0.217	-0.262	-0.045	-0.231	-0.18	-0.226	-0.228	-0.386	-0.16	-0.181	-0.239	-0.175	-0.299	-0.252	-0.269	-0.204	-0.189	-0.153	-0.213	-0.235	3.054	1.836	-0.187	-0.218	-0.231	-0.317	-0.226	-0.261	-0.232	-0.211	-0.249	-0.187
DNA topological change	-0.095	-0.298	1.309	-0.375	-0.455	-0.078	-0.4	-0.338	-0.423	-0.427	-0.722	-0.299	-0.34	-0.448	-0.327	-0.559	1.722	-0.504	-0.381	-0.353	-0.285	-0.399	-0.44	1.217	0.338	-0.35	-0.408	-0.432	-0.593	-0.423	-0.489	-0.434	-0.396	-0.467	-0.35
DNA transposition	-0.123	-0.385	0.724	1.63	-0.587	-0.101	3.466	-0.526	-0.659	0.877	0.787	-0.467	-0.53	0.777	-0.511	0.329	0.674	-0.786	1.126	1.3	-0.445	-0.622	-0.687	0.246	-0.61	-0.545	-0.636	2.38	-0.925	-0.659	-0.762	-0.677	-0.617	-0.728	1.325
DNA unwinding during replication	-0.078	-0.244	1.833	-0.306	-0.371	-0.064	-0.327	-0.478	-0.598	-0.605	-1.022	-0.423	-0.481	-0.634	-0.463	-0.791	-0.666	-0.713	-0.54	-0.5	-0.404	-0.565	-0.623	0.448	0.479	-0.495	-0.577	-0.612	-0.839	-0.598	-0.691	-0.614	-0.56	-0.66	-0.495
DNA-(apurinic or apyrimidinic site) lyase activity	-0.087	-0.272	-0.514	-0.343	-0.415	-0.071	2.449	-0.285	-0.357	-0.361	-0.61	-0.253	-0.287	-0.379	-0.277	-0.473	-0.398	-0.426	-0.322	-0.299	-0.241	-0.337	-0.372	-0.493	0.705	-0.295	-0.344	-0.365	-0.501	-0.357	-0.413	-0.367	-0.334	-0.394	-0.295
DNA-dependent ATPase activity	-0.165	-0.518	0.106	-0.651	-0.789	-0.135	-0.694	-0.746	0.172	-0.944	-0.918	-0.661	-0.751	-0.99	-0.723	-0.385	-1.041	-0.178	-0.843	-0.781	-0.631	-0.881	-0.973	0.349	1.956	0.553	0.243	0.126	-0.504	-0.934	-0.115	0.119	-0.874	-0.025	0.552
DNA-dependent DNA replication	-0.238	-0.744	0.11	1.271	-1.133	-0.194	-0.997	-1.22	-1.527	-1.545	-1.772	-1.082	-1.228	-1.62	-1.183	-0.97	-1.702	-1.244	-1.379	-1.277	-1.032	-0.72	-1.591	-0.084	-1.167	-0.444	-0.766	-0.226	-1.645	-1.527	-0.574	-0.903	-1.43	-1.065	-0.445
DNA-directed DNA polymerase activity	-0.123	-0.385	-0.727	-0.485	-0.587	-0.101	-0.517	-0.571	-0.715	-0.723	-1.222	-0.506	-0.575	-0.759	-0.554	0.161	-0.797	-0.853	-0.646	-0.598	-0.483	-0.675	-0.745	-0.987	-0.791	-0.592	-0.69	-0.732	-1.004	-0.715	-0.827	-0.735	-0.67	-0.79	-0.592
DNA-directed RNA polymerase activity	-0.103	2.83	1.125	-0.406	-0.491	-0.084	-0.432	-0.757	-0.947	-0.958	1.053	-0.671	1.925	-1.005	-0.734	3.778	-1.056	-1.13	-0.855	-0.792	-0.64	0.256	1.109	-1.308	-1.465	-0.784	1.341	-0.969	-0.535	0.142	-0.145	-0.973	-0.887	-1.046	-0.784
DNA-directed RNA polymerase I complex	-0.078	-0.244	-0.46	-0.306	-0.371	-0.064	-0.327	-0.478	-0.598	-0.605	1.086	-0.423	-0.481	-0.634	-0.463	4.502	-0.666	-0.713	-0.54	-0.5	-0.404	1.251	1.031	-0.825	-1.275	-0.495	2.981	-0.612	-0.839	1.121	0.808	-0.614	-0.56	-0.66	-0.495
DNA-directed RNA polymerase II\, core complex	-0.055	5.722	2.916	-0.217	-0.262	-0.045	-0.231	-0.442	-0.553	-0.56	2.469	-0.392	-0.445	-0.587	-0.429	0.696	-0.617	-0.66	-0.5	-0.463	-0.374	-0.523	-0.577	-0.764	-1.181	-0.458	-0.534	-0.566	-0.777	-0.554	-0.64	-0.569	-0.518	-0.611	-0.458
DNA-directed RNA polymerase II\, holoenzyme	-0.174	3.19	3.079	-0.687	0.419	-0.142	-0.732	-1.097	-1.373	-1.389	-0.026	-0.972	-1.104	-1.456	-1.064	-1.234	-1.53	-1.638	-1.24	-1.149	-0.928	-1.296	-1.431	-1.334	-2.156	-1.136	-1.325	-1.405	-1.927	-1.373	-1.587	-1.41	-1.286	-1.516	-1.136
DNA-directed RNA polymerase III complex								-0.526	-0.659	-0.667	1.744	-0.467	3.318	-0.699	-0.511	2.731	-0.735	-0.786	-0.595	-0.551	-0.445	-0.622	0.814	-0.91	-0.61	-0.545	0.979	-0.674	0.213	-0.659	-0.762	-0.677	-0.617	-0.728	-0.545
dodecenoyl-CoA delta-isomerase activity	-0.055	-0.172	-0.325	-0.217	-0.262	-0.045	-0.231	-0.18	4.318	4.266	2.4	-0.16	-0.181	4.057	-0.175	-0.299	3.849	3.578	4.806	5.202	-0.153	-0.213	-0.235	-0.312	-0.482	-0.187	-0.218	-0.231	-0.317	-0.226	-0.261	-0.232	-0.211	-0.249	-0.187
dolichol biosynthesis								-0.127	-0.16	-0.161	-0.273	-0.113	-0.128	-0.169	-0.124	-0.211	-0.178	-0.19	-0.144	-0.134	-0.108	-0.151	-0.166	-0.22	-0.34	-0.132	-0.154	-0.163	-0.224	-0.16	-0.185	-0.164	-0.149	-0.176	-0.132
dolichol kinase activity								-0.127	-0.16	-0.161	-0.273	-0.113	-0.128	-0.169	-0.124	-0.211	-0.178	-0.19	-0.144	-0.134	-0.108	-0.151	-0.166	-0.22	-0.34	-0.132	-0.154	-0.163	-0.224	-0.16	-0.185	-0.164	-0.149	-0.176	-0.132
dolichol metabolism								-0.127	-0.16	-0.161	-0.273	-0.113	-0.128	-0.169	-0.124	-0.211	-0.178	-0.19	-0.144	-0.134	-0.108	-0.151	-0.166	-0.22	-0.34	-0.132	-0.154	-0.163	-0.224	-0.16	-0.185	-0.164	-0.149	-0.176	-0.132
dolichol-linked oligosaccharide biosynthesis	-0.095	-0.298	-0.563	-0.375	-0.455	-0.078	-0.4	-0.383	-0.479	-0.485	-0.819	-0.339	-0.385	-0.508	-0.371	-0.634	-0.534	-0.572	-0.433	-0.401	-0.324	-0.452	-0.499	-0.661	-1.022	-0.396	-0.462	-0.49	-0.673	-0.479	-0.554	-0.492	-0.449	-0.529	-0.397
dolichyldiphosphatase activity	-0.039	-0.122	-0.23	-0.153	-0.185	-0.032	6.126	-0.127	-0.16	-0.161	-0.273	-0.113	-0.128	-0.169	-0.124	-0.211	-0.178	-0.19	-0.144	-0.134	-0.108	-0.151	-0.166	-0.22	-0.34	-0.132	-0.154	-0.163	-0.224	-0.16	-0.185	-0.164	-0.149	-0.176	-0.132
dolichyl-diphosphooligosaccharide-protein glycotransferase activity	-0.078	-0.244	-0.46	-0.306	-0.371	-0.064	-0.327	-0.383	-0.479	-0.485	1.809	-0.339	-0.385	-0.508	-0.371	-0.634	-0.534	-0.572	-0.433	-0.401	-0.324	-0.452	-0.499	-0.661	-1.022	-0.396	-0.462	-0.49	-0.673	-0.479	-0.554	-0.492	-0.449	-0.529	-0.397
dolichyl-phosphate beta-D-mannosyltransferase activity								-0.127	-0.16	-0.161	-0.273	-0.113	-0.128	-0.169	-0.124	-0.211	-0.178	-0.19	-0.144	-0.134	-0.108	-0.151	-0.166	-0.22	-0.34	-0.132	-0.154	-0.163	-0.224	-0.16	-0.185	-0.164	-0.149	-0.176	-0.132
dolichyl-phosphate beta-glucosyltransferase activity	-0.039	-0.122	-0.23	-0.153	-0.185	-0.032	-0.163	-0.127	-0.16	-0.161	3.666	-0.113	-0.128	-0.169	-0.124	-0.211	-0.178	-0.19	-0.144	-0.134	-0.108	-0.151	-0.166	-0.22	-0.34	-0.132	-0.154	-0.163	-0.224	-0.16	-0.185	-0.164	-0.149	-0.176	-0.132
dolichyl-phosphate-glucose-glycolipid alpha-glucosyltransferase activity	-0.039	-0.122	-0.23	-0.153	-0.185	-0.032	-0.163	-0.127	-0.16	-0.161	-0.273	-0.113	-0.128	-0.169	-0.124	-0.211	-0.178	-0.19	-0.144	-0.134	-0.108	-0.151	-0.166	-0.22	-0.34	-0.132	-0.154	-0.163	-0.224	-0.16	-0.185	-0.164	-0.149	-0.176	-0.132
dolichyl-phosphate-mannose-glycolipid alpha-mannosyltransferase activity	-0.039	-0.122	-0.23	-0.153	-0.185	-0.032	-0.163	-0.127	-0.16	-0.161	-0.273	-0.113	-0.128	-0.169	-0.124	-0.211	-0.178	-0.19	-0.144	-0.134	-0.108	-0.151	-0.166	-0.22	-0.34	-0.132	-0.154	-0.163	-0.224	-0.16	-0.185	-0.164	-0.149	-0.176	-0.132
dolichyl-phosphate-mannose-protein mannosyltransferase activity	-0.095	-0.298	1.309	-0.375	-0.455	-0.078	-0.4	-0.338	-0.423	-0.427	-0.722	-0.299	-0.34	-0.448	-0.327	-0.559	-0.471	-0.504	-0.381	-0.353	-0.285	-0.399	-0.44	-0.583	-0.901	-0.35	-0.408	-0.432	-0.593	-0.423	-0.489	-0.434	-0.396	-0.467	-0.35
double-strand break repair	11.43	-0.272	-0.514	2.647	-0.415	-0.071	-0.365	-0.723	0.234	-0.916	-1.548	-0.641	-0.728	-0.961	-0.702	-1.198	-1.009	-1.081	-0.817	-0.757	-0.612	-0.855	-0.943	-0.406	2.136	-0.749	-0.874	-0.927	-0.44	0.233	-1.047	-0.93	-0.848	-1	-0.749
double-strand break repair via break-induced replication	7.009	-0.44	-0.83	1.303	-0.67	-0.115	-0.589	-0.285	-0.357	-0.361	-0.61	-0.253	-0.287	-0.379	-0.277	-0.473	-0.398	-0.426	-0.322	-0.299	-0.241	-0.337	-0.372	1.636	2.171	-0.295	-0.344	-0.365	1.596	-0.357	-0.413	-0.367	-0.334	-0.394	-0.295
double-strand break repair via homologous recombination	6.745	-0.456	1.593	1.214	-0.695	-0.119	1.072	-0.46	1.208	-0.583	-0.985	-0.408	-0.463	-0.611	-0.446	-0.763	-0.642	-0.687	-0.52	-0.482	-0.389	-0.544	-0.6	0.526	2.411	-0.477	-0.556	-0.59	0.493	1.208	-0.666	-0.592	-0.539	-0.636	-0.477
double-strand break repair via nonhomologous end-joining	-0.055	-0.172	-0.325	-0.217	-0.262	-0.045	-0.231	-0.526	0.902	-0.667	-1.126	-0.467	-0.53	-0.699	-0.511	-0.872	-0.735	-0.786	-0.595	-0.551	-0.445	-0.622	-0.687	-0.91	-0.61	-0.545	-0.636	-0.674	-0.925	-0.659	-0.762	-0.677	-0.617	-0.728	-0.545
double-strand break repair via single-strand annealing	10.419	-0.298	-0.563	2.354	-0.455	-0.078	-0.4	-0.312	-0.391	-0.396	-0.668	-0.277	-0.314	-0.415	-0.303	-0.518	-0.436	-0.467	-0.353	-0.327	-0.264	-0.369	-0.408	1.404	0.504	-0.324	-0.377	-0.4	1.365	2.233	-0.452	-0.402	-0.366	-0.432	-0.324
double-strand break repair via single-strand annealing\, removal of nonhomologous ends	8.998	-0.345	-0.65	1.931	-0.525	-0.09	-0.462	-0.18	-0.226	-0.228	-0.386	-0.16	-0.181	-0.239	-0.175	-0.299	-0.252	-0.269	-0.204	-0.189	-0.153	-0.213	-0.235	-0.312	-0.482	-0.187	-0.218	-0.231	-0.317	-0.226	-0.261	-0.232	-0.211	-0.249	-0.187
double-strand break repair via synthesis-dependent strand annealing	4.968	-0.611	0.687	0.572	-0.93	-0.159	0.443	-0.361	-0.452	-0.457	-0.772	-0.32	-0.363	-0.479	-0.35	-0.598	-0.504	-0.539	-0.408	-0.378	-0.305	-0.427	-0.471	-0.624	2.515	-0.374	-0.436	-0.462	-0.634	1.821	-0.522	-0.464	-0.423	-0.499	-0.374
double-stranded DNA binding	11.43	-0.272	-0.514	2.647	-0.415	-0.071	-0.365	-0.361	-0.452	-0.457	-0.772	-0.32	-0.363	-0.479	-0.35	-0.598	-0.504	-0.539	-0.408	-0.378	-0.305	-0.427	-0.471	1.06	0.196	-0.374	-0.436	-0.462	1.024	-0.452	-0.522	-0.464	-0.423	-0.499	-0.374
double-stranded DNA specific 3-5 exodeoxyribonuclease activity								-0.127	-0.16	-0.161	-0.273	-0.113		-0.169	-0.124	-0.211	-0.178	-0.19	-0.144	-0.134	-0.108	-0.151	-0.166	-0.22	-0.34	-0.132	-0.154	-0.163	-0.224	-0.16	-0.185	-0.164	-0.149	-0.176	-0.132
double-stranded DNA specific 3-5 exodeoxyribonuclease activity	-0.039	-0.122	-0.23	-0.153	-0.185	-0.032	-0.163
double-stranded DNA specific exodeoxyribonuclease activity	-0.039	-0.122	-0.23	-0.153	-0.185	-0.032	-0.163	-0.127	-0.16	-0.161	-0.273	-0.113	-0.128	-0.169	-0.124	-0.211	-0.178	-0.19	-0.144	-0.134	-0.108	-0.151	-0.166	-0.22	-0.34	-0.132	-0.154	-0.163	-0.224	-0.16	-0.185	-0.164	-0.149	-0.176	-0.132
double-stranded RNA binding	-0.039	-0.122	-0.23	-0.153	-0.185	-0.032	-0.163	-0.18	-0.226	-0.228	2.4	-0.16	5.42	-0.239	-0.175	3.198	-0.252	-0.269	-0.204	-0.189	-0.153	-0.213	-0.235	-0.312	-0.482	-0.187	-0.218	-0.231	-0.317	-0.226	-0.261	-0.232	-0.211	-0.249	-0.187
DRAP deaminase activity								-0.127	-0.16	-0.161	-0.273	-0.113	-0.128	-0.169	-0.124	-0.211	-0.178	-0.19	-0.144	-0.134	-0.108	-0.151	-0.166	-0.22	-0.34	-0.132	-0.154	-0.163	-0.224	-0.16	-0.185	-0.164	-0.149	-0.176	-0.132
D-ribose metabolism	-0.039	-0.122	-0.23	-0.153	-0.185	-0.032	-0.163	-0.127	-0.16	-0.161	-0.273	-0.113	-0.128	-0.169	-0.124	-0.211	-0.178	-0.19	-0.144	-0.134	-0.108	-0.151	-0.166	-0.22	-0.34	-0.132	-0.154	-0.163	-0.224	-0.16	-0.185	-0.164	-0.149	-0.176	-0.132
drug binding								-0.18	-0.226	-0.228	-0.386	-0.16	-0.181	-0.239	-0.175	-0.299	-0.252	-0.269	-0.204	-0.189	-0.153	-0.213	-0.235	-0.312	-0.482	-0.187	-0.218	4.215	-0.317	-0.226	-0.261	-0.232	-0.211	-0.249	-0.187
drug metabolism	-0.039	-0.122	-0.23	-0.153	-0.185	-0.032	-0.163	-0.127	-0.16	-0.161	3.666	-0.113	-0.128	-0.169	-0.124	-0.211	-0.178	-0.19	-0.144	-0.134	-0.108	-0.151	-0.166	-0.22	-0.34	-0.132	-0.154	-0.163	-0.224	-0.16	-0.185	-0.164	-0.149	-0.176	-0.132
drug transport	-0.151	-0.472	-0.891	-0.594	0.723	-0.123	-0.633	-0.511	-0.639	-0.647	-1.093	-0.453	-0.514	-0.678	-0.495	-0.846	-0.713	-0.763	-0.577	-0.535	-0.432	2.794	2.428	6.266	5.201	3.329	2.712	5.641	1.45	4.186	3.469	4.047	4.539	3.687	1.399
drug transporter activity	-0.156	-0.488	-0.921	-0.614	0.654	-0.127	-0.654	-0.494	-0.619	-0.626	-1.058	-0.438	-0.498	-0.657	-0.48	-0.819	-0.69	-0.739	-0.559	-0.518	-0.418	2.925	2.55	8.989	6.306	3.472	2.841	5.868	1.555	4.364	3.631	4.222	4.726	3.853	1.479
dTDP biosynthesis								-0.127	-0.16	-0.161	-0.273	-0.113	-0.128	-0.169	-0.124	-0.211	-0.178	-0.19	-0.144	-0.134	-0.108	-0.151	-0.166	-0.22	-0.34	-0.132	-0.154	-0.163	-0.224	-0.16	-0.185	-0.164	-0.149	-0.176	-0.132
dTDP metabolism								-0.127	-0.16	-0.161	-0.273	-0.113	-0.128	-0.169	-0.124	-0.211	-0.178	-0.19	-0.144	-0.134	-0.108	-0.151	-0.166	-0.22	-0.34	-0.132	-0.154	-0.163	-0.224	-0.16	-0.185	-0.164	-0.149	-0.176	-0.132
dTMP biosynthesis	-0.055	-0.172	2.916	-0.217	-0.262	-0.045	-0.231	-0.221	-0.276	-0.28	-0.473	-0.196	-0.222	-0.293	-0.214	-0.366	-0.308	-0.33	-0.25	-0.231	-0.187	-0.261	-0.288	2.367	1.303	-0.229	-0.267	-0.283	-0.388	-0.277	-0.32	-0.284	-0.259	-0.305	-0.229
dTMP metabolism	-0.055	-0.172	2.916	-0.217	-0.262	-0.045	-0.231	-0.221	-0.276	-0.28	-0.473	-0.196	-0.222	-0.293	-0.214	-0.366	-0.308	-0.33	-0.25	-0.231	-0.187	-0.261	-0.288	2.367	1.303	-0.229	-0.267	-0.283	-0.388	-0.277	-0.32	-0.284	-0.259	-0.305	-0.229
dTTP biosynthesis								-0.127	-0.16	-0.161	-0.273	-0.113	-0.128	-0.169	-0.124	-0.211	-0.178	-0.19	-0.144	-0.134	-0.108	-0.151	-0.166	-0.22	-0.34	-0.132	-0.154	-0.163	-0.224	-0.16	-0.185	-0.164	-0.149	-0.176	-0.132
dTTP metabolism								-0.127	-0.16	-0.161	-0.273	-0.113	-0.128	-0.169	-0.124	-0.211	-0.178	-0.19	-0.144	-0.134	-0.108	-0.151	-0.166	-0.22	-0.34	-0.132	-0.154	-0.163	-0.224	-0.16	-0.185	-0.164	-0.149	-0.176	-0.132
dUDP biosynthesis								-0.127	-0.16	-0.161	-0.273	-0.113	-0.128	-0.169	-0.124	-0.211	-0.178	-0.19	-0.144	-0.134	-0.108	-0.151	-0.166	-0.22	-0.34	-0.132	-0.154	-0.163	-0.224	-0.16	-0.185	-0.164	-0.149	-0.176	-0.132
dUDP metabolism								-0.127	-0.16	-0.161	-0.273	-0.113	-0.128	-0.169	-0.124	-0.211	-0.178	-0.19	-0.144	-0.134	-0.108	-0.151	-0.166	-0.22	-0.34	-0.132	-0.154	-0.163	-0.224	-0.16	-0.185	-0.164	-0.149	-0.176	-0.132
dUTP diphosphatase activity								-0.127	-0.16	-0.161	-0.273	-0.113	-0.128	-0.169	-0.124	-0.211	-0.178	-0.19	-0.144	-0.134	-0.108	-0.151	-0.166	-0.22	-0.34	-0.132	-0.154	-0.163	-0.224	-0.16	-0.185	-0.164	-0.149	-0.176	-0.132
dUTP metabolism								-0.127	-0.16	-0.161	-0.273	-0.113	-0.128	-0.169	-0.124	-0.211	-0.178	-0.19	-0.144	-0.134	-0.108	-0.151	-0.166	-0.22	-0.34	-0.132	-0.154	-0.163	-0.224	-0.16	-0.185	-0.164	-0.149	-0.176	-0.132
D-xylose metabolism	-0.078	-0.244	-0.46	-0.306	-0.371	-0.064	-0.327	-0.255	-0.319	-0.323	-0.546	-0.226	-0.257	-0.339	-0.247	-0.423	-0.356	-0.381	-0.288	-0.267	-0.216	-0.301	-0.333	1.94	0.958	-0.264	-0.308	-0.327	4.24	-0.319	-0.369	-0.328	-0.299	2.573	-0.264
D-xylulose reductase activity	-0.039	-0.122	-0.23	-0.153	-0.185	-0.032	-0.163	-0.127	-0.16	-0.161	-0.273	-0.113	-0.128	-0.169	-0.124	-0.211	-0.178	-0.19	-0.144	-0.134	-0.108	-0.151	-0.166	-0.22	-0.34	-0.132	-0.154	-0.163	-0.224	-0.16	-0.185	-0.164	-0.149	-0.176	-0.132
dynactin complex	-0.067	-0.211	-0.398	-0.265	-0.321	-0.055	3.35	-0.221	-0.276	-0.28	-0.473	-0.196	-0.222	-0.293	-0.214	-0.366	-0.308	-0.33	-0.25	-0.231	-0.187	-0.261	-0.288	-0.382	-0.59	-0.229	-0.267	-0.283	-0.388	-0.277	-0.32	-0.284	-0.259	-0.305	-0.229
dynein complex	-0.067	-0.211	-0.398	-0.265	-0.321	-0.055	-0.283	-0.221	-0.276	-0.28	-0.473	-0.196	-0.222	-0.293	-0.214	-0.366	-0.308	-0.33	-0.25	-0.231	-0.187	3.658	3.28	2.367	1.303	-0.229	-0.267	3.347	2.319	3.433	2.916	-0.284	-0.259	-0.305	-0.229
early endosome	-0.039	-0.122	-0.23	-0.153	-0.185	-0.032	6.126	-0.221	-0.276	-0.28	-0.473	-0.196	-0.222	-0.293	-0.214	-0.366	-0.308	-0.33	-0.25	-0.231	-0.187	-0.261	-0.288	-0.382	-0.59	-0.229	-0.267	-0.283	-0.388	-0.277	-0.32	-0.284	-0.259	-0.305	-0.229
early endosome to late endosome transport	-0.055	-0.172	-0.325	-0.217	3.682	-0.045	4.217	-0.127	-0.16	-0.161	-0.273	-0.113	-0.128	-0.169	-0.124	-0.211	-0.178	-0.19	-0.144	-0.134	-0.108	-0.151	-0.166	-0.22	-0.34	-0.132	-0.154	-0.163	-0.224	-0.16	-0.185	-0.164	-0.149	-0.176	-0.132
electrochemical potential-driven transporter activity	-0.356	0.746	-2.102	0.089	-0.452	-0.291	-1.493	4.415	2.991	2.274	-0.316	1.611	0.333	1.406	1.276	-0.094	1.77	1.98	1.449	2.552	1.792	-0.122	-0.401	3.621	4.952	3.394	1.851	3.496	5.408	0.37	-0.701	3.47	2.692	5.991	0.251
electron carrier activity	-0.067	-0.211	-0.398	-0.265	-0.321	-0.055	-0.283	-0.285	2.517	2.482	-0.61	3.755	-0.287	2.339	3.397	-0.473	4.791	4.443	2.847	-0.299	-0.241	-0.337	-0.372	1.636	0.705	-0.295	-0.344	-0.365	-0.501	-0.357	-0.413	-0.367	-0.334	-0.394	-0.295
electron transport	-0.228	-0.713	-1.345	-0.897	-0.125	-0.186	-0.956	0.722	2.846	1.049	-0.59	1.154	-0.018	1.384	2.317	-1.047	5.335	6.71	0.293	0.559	0.478	-1.705	-0.763	4.399	4.454	-0.099	-0.539	4.411	2.98	0.52	0.448	2.113	2.024	4.358	1.991
electron transporter activity	-0.039	-0.122	-0.23	-0.153	-0.185	-0.032	-0.163	0.381	0.917	-0.09	-0.59	0.627	-0.845	-0.184	0.443	-1.391	3.268	2.912	0.136	-0.879	-0.71	-0.992	-0.149	5.107	2.777	-0.869	-1.014	1.812	1.396	-1.051	-0.357	0.838	0.064	1.526	1.489
electron transporter\, transferring electrons within CoQH2-cytochrome c reductase complex activity	-0.394	-1.233	-0.934	-1.551	-0.184	-0.322	-1.653	-0.127	-0.16	-0.161	-0.273	-0.113	-0.128	-0.169	-0.124	-0.211	-0.178	5.251	-0.144	-0.134	-0.108	-0.151	-0.166	-0.22	-0.34	-0.132	-0.154	-0.163	-0.224	-0.16	-0.185	-0.164	-0.149	-0.176	-0.132
electron-transferring-flavoprotein dehydrogenase activity	-0.039	-0.122	-0.23	-0.153	-0.185	-0.032	-0.163	-0.127	-0.16	-0.161	-0.273	-0.113	-0.128	-0.169	-0.124	-0.211	-0.178	5.251	-0.144	-0.134	-0.108	-0.151	-0.166	-0.22	-0.34	-0.132	-0.154	-0.163	-0.224	-0.16	-0.185	-0.164	-0.149	-0.176	-0.132
endocytosis	-0.265	2.877	0.472	6.881	7.833	-0.217	1.685	-0.95	-1.19	-0.342	-1.499	-0.843	0.117	0.385	-0.922	-0.904	-0.54	-1.42	-1.074	-0.995	-0.804	-1.123	-1.24	-1.642	-2.094	-0.984	-1.148	-1.217	-1.67	-1.19	-0.616	-1.222	-1.114	-1.314	-0.985
endodeoxyribonuclease activity	-0.039	-0.122	-0.23	-0.153	-0.185	-0.032	-0.163	-0.494	-0.619	1.017	-0.039	-0.438	-0.498	-0.657	-0.48	-0.819	2.309	-0.739	-0.559	-0.518	2.007	-0.584	0.953	-0.854	0.374	-0.512	-0.597	-0.633	-0.869	-0.619	-0.716	-0.636	-0.58	-0.684	-0.512
endodeoxyribonuclease activity\, producing 3????-phosphomonoesters								-0.127	-0.16	-0.161	-0.273	-0.113		-0.169	-0.124	-0.211	5.621	-0.19	-0.144	-0.134	-0.108	-0.151	-0.166	-0.22	-0.34	-0.132	-0.154	-0.163	-0.224	-0.16	-0.185	-0.164	-0.149	-0.176	-0.132
endodeoxyribonuclease activity\, producing 3¢®?-phosphomonoesters	-0.078	-0.244	1.833	-0.306	-0.371	-0.064	-0.327
endodeoxyribonuclease activity\, producing 5????-phosphomonoesters								-0.255	-0.319	-0.323	-0.546	-0.226		-0.339	-0.247	-0.423	-0.356	-0.381	-0.288	-0.267	-0.216	-0.301	-0.333	-0.441	-0.681	-0.264	-0.308	-0.327	-0.448	-0.319	-0.369	-0.328	-0.299	-0.353	-0.264
endodeoxyribonuclease activity\, producing 5¢®?-phosphomonoesters	-0.146	-0.456	0.366	-0.574	-0.695	-0.119	-0.612
endomembrane system	-0.444	0.12	-0.131	0.672	3.944	-0.362	2.693	-1.977	-1.175	-0.361	1.612	-1.149	-1.989	-1.396	-0.81	-2.608	-1.586	-1.486	-1.756	-1.556	-1.04	-1.879	-2.162	-2.453	-4.616	-1.008	-1.491	-1.684	-2.21	-1.609	-2.106	-1.698	-1.856	-0.762	-1.529
endonuclease activity	-0.055	-0.172	-0.325	-0.217	-0.262	-0.045	-0.231	1.128	0.474	0.442	-0.009	1.5	1.109	0.308	-0.947	0.341	1.7	-0.022	-0.168	0.99	2.889	-1.154	0.358	-0.43	-0.443	-1.011	-1.179	0.409	-1.716	-1.222	-0.673	-1.255	-1.144	-1.35	0.005
endonuclease activity\, active with either ribo- or deoxyribonucleic acids and producing 3????-phosphomonoesters								3.281	2.517	-0.361	-0.61	3.755		2.339	-0.277	1.74	4.791	2.008	2.847	3.112	3.955	-0.337	-0.372	-0.493	-0.762	-0.295	-0.344	-0.365	-0.501	-0.357	-0.413	-0.367	-0.334	-0.394	-0.295
endonuclease activity\, active with either ribo- or deoxyribonucleic acids and producing 3¢®?-phosphomonoesters	-0.135	-0.422	1.853	-0.531	0.969	-0.11	-0.566
endonuclease activity\, active with either ribo- or deoxyribonucleic acids and producing 5????-phosphomonoesters								1.005	0.531	-0.793	1.078	-0.555		-0.831	-0.607	0.986	0.313	0.178	-0.707	0.904	1.389	-0.74	0.448	-0.108	-1.001	-0.648	-0.756	-0.802	-1.1	-0.784	0.24	-0.805	-0.734	-0.865	-0.649
endonuclease activity\, active with either ribo- or deoxyribonucleic acids and producing 5¢®?-phosphomonoesters	4.205	-0.713	0.233	0.254	-0.125	-0.186	0.127
endopeptidase activity	-0.28	-0.884	-1.028	-1.101	0.211	-0.23	1.486	-0.301	-0.768	-1.491	-1.653	-1.044	-1.185	-1.564	-1.142	-1.951	-0.368	-0.563	0.227	-1.233	-0.996	-1.392	-1.536	-1.512	-1.343	-1.22	-1.422	-0.817	-1.554	-0.768	-1.088	-0.826	-0.628	-1.628	-1.22
endopeptidase inhibitor activity	-0.067	-0.211	-0.398	-0.265	-0.321	-0.055	-0.283	-0.255	-0.319	-0.323	-0.546	-0.226	-0.257	5.739	-0.247	-0.423	-0.356	-0.381	-0.288	-0.267	-0.216	-0.301	-0.333	-0.441	5.876	-0.264	-0.308	-0.327	6.585	-0.319	-0.369	-0.328	-0.299	5.498	-0.264
endoplasmic reticulum	-0.055	-0.172	-0.325	-0.217	-0.262	-0.045	-0.231	-0.636	-0.873	0.495	3.653	-0.642	-1.997	-0.834	-0.97	-3.187	-1.432	-1.181	-1.151	-1.685	-0.999	-2.106	-2.47	-2.589	-4.455	-2.513	-2.93	0.068	-1.106	-2.316	-1.939	-1.713	-1.692	-1.056	-2.514
endoplasmic reticulum inheritance	-0.039	-0.122	-0.23	-0.153	5.392	-0.032	-0.163	-0.18	-0.226	-0.228	-0.386	-0.16	-0.181	-0.239	-0.175	-0.299	-0.252	-0.269	-0.204	-0.189	-0.153	-0.213	-0.235	-0.312	-0.482	-0.187	-0.218	-0.231	-0.317	-0.226	-0.261	-0.232	-0.211	-0.249	-0.187
endoplasmic reticulum lumen	-0.306	0.117	0.557	2.242	3.578	-0.25	3.584	-0.285	-0.357	-0.361	-0.61	-0.253	-0.287	-0.379	-0.277	-0.473	-0.398	-0.426	-0.322	-0.299	-0.241	-0.337	-0.372	-0.493	-0.762	-0.295	-0.344	-0.365	1.596	-0.357	-0.413	-0.367	-0.334	-0.394	-0.295
endoplasmic reticulum membrane	1.156	-0.18	-0.119	1.733	3.603	3.816	4.346	-1.319	-1.652	-0.418	3.389	-1.17	-1.328	-1.752	-0.47	-1.699	-1.841	-1.435	-0.793	-0.63	-1.116	-1.56	-1.721	-1.811	-3.2	-1.367	-1.593	-1.071	-1.857	-1.652	-1.357	-1.697	-1.547	-0.671	-1.367
endopolyphosphatase activity	-0.039	-0.122	-0.23	-0.153	-0.185	-0.032	-0.163	-0.127	-0.16	-0.161	-0.273	-0.113	-0.128	-0.169	-0.124	-0.211	-0.178	-0.19	-0.144	-0.134	-0.108	-0.151	-0.166	-0.22	-0.34	-0.132	-0.154	-0.163	-0.224	-0.16	-0.185	-0.164	-0.149	-0.176	-0.132
endoribonuclease activity	-0.039	-0.122	-0.23	-0.153	-0.185	-0.032	-0.163	2.482	1.71	0.424	0.929	2.945	2.459	1.523	-0.632	1.837	1.371	1.166	0.656	2.315	3.137	-0.77	0.365	-0.19	-1.096	-0.675	-0.787	-0.835	-1.145	-0.816	0.158	-0.838	-0.764	-0.901	-0.675
endoribonuclease activity\, producing 3????-phosphomonoesters								3.731	2.894	-0.323	-0.546	4.255		2.7	-0.247	2.051	2.544	2.34	3.255	3.546	4.476	-0.301	-0.333	-0.441	-0.681	-0.264	-0.308	-0.327	-0.448	-0.319	-0.369	-0.328	-0.299	-0.353	-0.264
endoribonuclease activity\, producing 3¢®?-phosphomonoesters	-0.11	-0.345	0.971	-0.434	1.449	-0.09	-0.462
endoribonuclease activity\, producing 5????-phosphomonoesters								1.214	0.724	-0.723	1.425	-0.506		-0.759	-0.554	1.269	0.502	0.366	-0.646	1.11	1.618	-0.675	0.639	0.079	-0.791	-0.592	-0.69	-0.732	-1.004	-0.715	0.428	-0.735	-0.67	-0.79	-0.592
endoribonuclease activity\, producing 5¢®?-phosphomonoesters	-0.129	-0.404	0.621	-0.509	1.068	-0.105	-0.542
endosome	-0.135	-0.422	3.177	7.194	4.194	-0.11	1.252	-0.993	0.425	0.392	0.432	-0.881	-1	1.047	-0.963	-1.645	0.12	-0.071	-0.203	-1.04	-0.84	2.35	1.111	-0.48	-1.375	-1.029	-0.336	-1.272	-1.745	2.093	1.472	-0.464	0.612	-1.373	-0.029
endosome membrane	-0.21	0.895	3.029	4.152	6.274	-0.172	9.667	-0.46	-0.576	1.182	2.296	-0.408	-0.463	-0.611	-0.446	-0.763	0.968	0.823	-0.52	-0.482	-0.389	-0.544	-0.6	-0.795	-1.229	-0.477	-0.556	-0.59	-0.809	-0.576	-0.666	-0.592	-0.539	-0.636	-0.477
endosome organization and biogenesis	-0.21	0.895	3.029	4.152	6.274	-0.172	9.667	0.724	1.423	0.243	-0.104	-0.631	-0.716	0.149	0.788	-1.179	2.14	1.877	-0.805	0.628	-0.602	0.381	0.185	-0.373	-1.311	0.651	0.338	0.22	-0.407	0.266	-0.021	0.213	0.398	0.069	0.65
endosome to lysosome transport								-0.127	6.266	-0.161	-0.273	-0.113	-0.128	5.906	-0.124	-0.211	5.621	5.251	-0.144	-0.134	-0.108	-0.151	-0.166	-0.22	-0.34	-0.132	-0.154	-0.163	-0.224	-0.16	-0.185	-0.164	-0.149	-0.176	-0.132
endosome transport	-0.293	0.204	2.586	3.341	4.607	-0.239	4.695	0.724	1.423	0.243	-0.104	-0.631	-0.716	0.149	0.788	-1.179	2.14	1.877	-0.805	0.628	-0.602	0.381	0.185	-0.373	-1.311	0.651	0.338	0.22	-0.407	0.266	-0.021	0.213	0.398	0.069	0.65
energy coupled proton transport\, against electrochemical gradient	-0.039	-0.122	-0.23	6.528	-0.185	-0.032	6.126	-0.127	-0.16	-0.161	-0.273	-0.113	-0.128	-0.169	-0.124	-0.211	-0.178	-0.19	-0.144	-0.134	-0.108	-0.151	-0.166	-0.22	-0.34	-0.132	-0.154	-0.163	-0.224	-0.16	-0.185	-0.164	-0.149	-0.176	-0.132
energy coupled proton transport\, down electrochemical gradient	-0.191	-0.598	2.624	10.19	-0.911	-0.156	9.499	0.626	0.172	0.149	-1.595	0.88	-0.751	0.055	0.689	-1.236	-0.043	-0.178	-0.843	-0.781	0.983	0.286	-0.973	0.349	0.264	0.553	2.531	2.289	4.334	1.277	1.813	1.196	1.48	1.988	1.877
energy derivation by oxidation of organic compounds	-0.514	0.369	-0.497	-0.438	-1.566	-0.419	-0.663	4.422	4.119	4.022	-1.144	2.861	-1.285	5.366	4.079	-2.007	6.545	10.083	1.993	-0.833	3.209	-0.732	-1.089	-1.157	2.56	2.508	1.094	1.226	5.466	-0.48	0.126	0.783	2.267	5.443	0.337
energy reserve metabolism	-0.203	4.193	-1.198	1.781	1.187	-0.166	0.364	5.031	2.581	7.111	0.605	2.596	-0.716	7.809	5.225	-1.179	4.229	5.797	1.747	-0.745	1.087	0.381	0.185	-1.23	-0.13	-0.737	-0.86	-0.912	1.282	-0.891	-1.03	-0.915	0.398	1.123	-0.738
enoyl-[acyl-carrier protein] reductase (NADH) activity								-0.127	-0.16	-0.161	3.666	-0.113	-0.128	-0.169	-0.124	-0.211	-0.178	-0.19	-0.144	-0.134	-0.108	-0.151	-0.166	-0.22	-0.34	-0.132	-0.154	-0.163	-0.224	-0.16	-0.185	-0.164	-0.149	-0.176	-0.132
enoyl-[acyl-carrier protein] reductase (NADPH\, B-specific) activity	-0.039	-0.122	4.353	-0.153	-0.185	-0.032	-0.163	-0.127	-0.16	-0.161	-0.273	-0.113	-0.128	-0.169	-0.124	-0.211	-0.178	-0.19	-0.144	-0.134	-0.108	-0.151	-0.166	-0.22	-0.34	-0.132	-0.154	-0.163	-0.224	-0.16	-0.185	-0.164	-0.149	-0.176	-0.132
enoyl-[acyl-carrier protein] reductase activity	-0.039	-0.122	4.353	-0.153	-0.185	-0.032	-0.163	-0.18	-0.226	-0.228	2.4	-0.16	-0.181	-0.239	-0.175	-0.299	-0.252	-0.269	-0.204	-0.189	-0.153	-0.213	-0.235	-0.312	-0.482	-0.187	-0.218	-0.231	-0.317	-0.226	-0.261	-0.232	-0.211	-0.249	-0.187
enterobactin transport	-0.039	-0.122	-0.23	-0.153	-0.185	-0.032	-0.163	-0.127	-0.16	-0.161	-0.273	-0.113	-0.128	-0.169	-0.124	-0.211	-0.178	-0.19	-0.144	-0.134	-0.108	-0.151	-0.166	-0.22	-0.34	-0.132	-0.154	-0.163	-0.224	6.265	5.419	-0.164	-0.149	-0.176	-0.132
enzyme activator activity	-0.28	1.474	2.224	0.782	1.811	-0.228	1.486	-0.085	-1.324	-1.34	-1.783	-0.938	-1.065	-0.664	-1.026	-1.15	-0.769	-0.916	-1.196	-1.108	-0.895	-0.422	0.128	-1.248	-1.625	-1.096	-1.278	-0.588	-1.287	-1.325	-1.531	-0.596	-1.24	-0.749	-0.156
enzyme binding	-0.117	-0.366	-0.69	-0.46	1.304	-0.095	-0.49	-0.423	-0.53	-0.536	-0.906	-0.375	-0.426	-0.562	-0.411	-0.701	-0.591	1.01	-0.478	-0.443	-0.358	-0.5	-0.552	-0.731	0.848	-0.438	-0.511	-0.542	-0.744	-0.53	-0.613	-0.544	-0.496	-0.585	-0.439
enzyme inhibitor activity	-0.156	1.6	0.227	-0.614	0.654	-0.127	0.921	1.275	0.78	0.756	-1.191	-0.494	1.26	4.846	1.347	0.214	1.888	1.669	-0.629	-0.583	-0.471	-0.658	-0.726	0.132	3.786	-0.577	-0.672	-0.713	4.408	-0.697	-0.806	-0.716	-0.653	3.263	-0.577
enzyme regulator activity	-0.423	2.618	2.27	0.23	2.732	-0.346	1.2	0.397	-0.386	0.1	-0.779	-1.404	-0.938	1.922	0.504	-1.396	0.671	0.338	0.557	-1.027	-1.34	-0.186	-0.019	-1.16	-0.429	-0.364	-0.812	-0.467	1.099	-0.387	-1.364	0.038	-0.723	1.201	0.273
epidermal growth factor receptor activity	-0.055	-0.172	-0.325	-0.217	-0.262	-0.045	-0.231	-0.18	-0.226	-0.228	-0.386	-0.16	-0.181	-0.239	-0.175	-0.299	-0.252	-0.269	-0.204	-0.189	-0.153	-0.213	-0.235	-0.312	1.836	-0.187	-0.218	4.215	-0.317	-0.226	-0.261	-0.232	-0.211	-0.249	-0.187
epoxide hydrolase activity	-0.039	-0.122	-0.23	-0.153	-0.185	-0.032	-0.163	-0.127	-0.16	-0.161	-0.273	-0.113	-0.128	-0.169	-0.124	-0.211	-0.178	-0.19	-0.144	-0.134	-0.108	-0.151	-0.166	-0.22	-0.34	-0.132	-0.154	-0.163	-0.224	-0.16	-0.185	-0.164	-0.149	-0.176	-0.132
epsilon DNA polymerase activity	-0.055	-0.172	-0.325	-0.217	-0.262	-0.045	-0.231	-0.255	-0.319	-0.323	-0.546	-0.226	-0.257	-0.339	-0.247	-0.423	-0.356	-0.381	-0.288	-0.267	-0.216	-0.301	-0.333	-0.441	-0.681	-0.264	-0.308	-0.327	-0.448	-0.319	-0.369	-0.328	-0.299	-0.353	-0.264
epsilon DNA polymerase complex	-0.055	-0.172	-0.325	-0.217	-0.262	-0.045	-0.231	-0.255	-0.319	-0.323	-0.546	-0.226	-0.257	-0.339	-0.247	-0.423	-0.356	-0.381	-0.288	-0.267	-0.216	-0.301	-0.333	-0.441	-0.681	-0.264	-0.308	-0.327	-0.448	-0.319	-0.369	-0.328	-0.299	-0.353	-0.264
ER organization and biogenesis	-0.078	-0.244	-0.46	-0.306	2.419	-0.064	-0.327	-0.255	-0.319	-0.323	-0.546	-0.226	-0.257	-0.339	-0.247	-0.423	-0.356	-0.381	-0.288	-0.267	-0.216	-0.301	-0.333	-0.441	-0.681	-0.264	-0.308	-0.327	-0.448	-0.319	-0.369	-0.328	-0.299	-0.353	-0.264
ER retention sequence binding								-0.127	-0.16	-0.161	-0.273	-0.113	-0.128	-0.169	-0.124	-0.211	-0.178	-0.19	-0.144	-0.134	-0.108	-0.151	-0.166	-0.22	-0.34	-0.132	-0.154	-0.163	-0.224	-0.16	-0.185	-0.164	-0.149	-0.176	-0.132
ER to Golgi transport	-0.224	0.754	0.277	-0.884	-0.095	-0.183	0.158	-1.042	-0.509	-0.533	0.697	0.186	-1.049	-0.631	-1.011	-1.727	-0.736	-0.883	-0.3	-0.147	0.28	1.29	1.702	-0.622	-2.377	0.829	0.388	0.222	-0.67	1.082	0.574	0.211	0.473	-0.717	0.828
ER to Golgi transport vesicle								-0.127	-0.16	-0.161	-0.273	-0.113	-0.128	-0.169	-0.124	-0.211	-0.178	-0.19	-0.144	-0.134	-0.108	-0.151	-0.166	-0.22	-0.34	-0.132	-0.154	-0.163	-0.224	-0.16	-0.185	-0.164	-0.149	-0.176	-0.132
ER-associated protein catabolism	-0.129	-0.404	-0.763	-0.509	1.068	-0.105	-0.542	-0.494	-0.619	-0.626	-0.039	-0.438	-0.498	-0.657	-0.48	-0.819	-0.69	-0.739	-0.559	-0.518	-0.418	-0.584	-0.645	-0.854	-0.473	-0.512	-0.597	-0.633	-0.869	-0.619	-0.716	-0.636	-0.58	-0.684	-0.512
ER-Golgi intermediate compartment	-0.055	-0.172	2.916	-0.217	-0.262	-0.045	-0.231	-0.18	-0.226	-0.228	-0.386	-0.16	-0.181	-0.239	-0.175	-0.299	-0.252	-0.269	-0.204	-0.189	-0.153	-0.213	-0.235	-0.312	-0.482	-0.187	-0.218	-0.231	-0.317	-0.226	-0.261	-0.232	-0.211	-0.249	-0.187
ergosterol biosynthesis	-0.078	-0.244	-0.46	6.377	2.419	-0.064	2.819	-0.361	-0.452	-0.457	0.621	-0.32	-0.363	-0.479	-0.35	-0.598	1.548	-0.539	-0.408	-0.378	-0.305	-0.427	-0.471	-0.624	-0.964	-0.374	-0.436	6.21	-0.634	-0.452	-0.522	-0.464	-0.423	-0.499	-0.374
ergosterol metabolism	-0.078	-0.244	-0.46	6.377	2.419	-0.064	2.819	-0.361	-0.452	-0.457	0.621	-0.32	-0.363	-0.479	-0.35	-0.598	1.548	-0.539	-0.408	-0.378	-0.305	-0.427	-0.471	-0.624	-0.964	-0.374	-0.436	6.21	-0.634	-0.452	-0.522	-0.464	-0.423	-0.499	-0.374
ER-nuclear signaling pathway	-0.055	-0.172	6.157	-0.217	-0.262	-0.045	-0.231	-0.221	-0.276	-0.28	-0.473	-0.196	-0.222	-0.293	-0.214	-0.366	-0.308	-0.33	-0.25	-0.231	-0.187	-0.261	-0.288	-0.382	-0.59	-0.229	-0.267	-0.283	-0.388	-0.277	-0.32	-0.284	3.691	-0.305	-0.229
ESCRT I complex	-0.067	-0.211	-0.398	-0.265	-0.321	-0.055	-0.283	-0.221	-0.276	3.39	4.077	-0.196	-0.222	-0.293	-0.214	-0.366	-0.308	-0.33	-0.25	-0.231	-0.187	-0.261	-0.288	-0.382	-0.59	-0.229	-0.267	-0.283	-0.388	-0.277	-0.32	-0.284	-0.259	-0.305	-0.229
ESCRT II complex	-0.067	-0.211	-0.398	7.451	-0.321	-0.055	-0.283	-0.221	-0.276	-0.28	1.802	-0.196	-0.222	-0.293	-0.214	-0.366	-0.308	-0.33	-0.25	-0.231	-0.187	-0.261	-0.288	-0.382	-0.59	-0.229	-0.267	-0.283	-0.388	-0.277	-0.32	-0.284	-0.259	-0.305	-0.229
ESCRT III complex	-0.078	-0.244	4.125	3.035	5.209	-0.064	-0.327	-0.255	-0.319	-0.323	-0.546	-0.226	-0.257	-0.339	-0.247	-0.423	2.544	2.34	-0.288	-0.267	-0.216	-0.301	-0.333	-0.441	-0.681	-0.264	-0.308	-0.327	-0.448	-0.319	-0.369	-0.328	-0.299	-0.353	-0.264
establishment and/or maintenance of cell polarity	2.775	0.982	3.034	5.152	4.487	-0.268	1.656	-1.294	-1.619	-1.638	0.002	-1.147	-0.506	-1.718	-1.255	-0.156	-1.805	-1.932	-1.462	-1.355	-1.094	0.516	0.796	-1.279	-2.467	0.208	-0.226	-1.657	-1.802	0.317	0.379	-0.405	0.545	-1.789	-0.567
establishment and/or maintenance of cell polarity (sensu Fungi)	2.775	0.982	3.034	5.152	4.487	-0.268	1.656	-1.294	-1.619	-1.638	0.002	-1.147	-0.506	-1.718	-1.255	-0.156	-1.805	-1.932	-1.462	-1.355	-1.094	0.516	0.796	-1.279	-2.467	0.208	-0.226	-1.657	-1.802	0.317	0.379	-0.405	0.545	-1.789	-0.567
establishment and/or maintenance of chromatin architecture	1.824	4.479	4.212	-1.79	-1.179	2.419	-0.237	-1.226	-0.855	0.498	1.315	-0.949	-1.241	-1.958	-0.553	-2.636	-2.1	-1.906	-1.526	-0.779	-1.53	-1.642	-1.908	-3.126	-3.153	-1.874	-2.185	-2.317	-2.836	-1.325	-2.208	-0.952	-1.12	-2.501	-1.874
establishment of cell polarity	2.824	1.026	3.134	5.263	4.597	-0.264	0.95	-1.267	-1.586	-1.605	0.114	-1.124	-0.464	-1.683	-1.229	-0.073	-1.768	-1.893	-1.432	-1.327	-1.072	0.588	0.88	-1.214	-2.376	0.267	-0.168	-1.623	-1.747	0.388	0.463	-0.346	0.618	-1.752	-0.524
establishment of cell polarity (sensu Fungi)	2.824	1.026	3.134	5.263	4.597	-0.264	0.95	-1.267	-1.586	-1.605	0.114	-1.124	-0.464	-1.683	-1.229	-0.073	-1.768	-1.893	-1.432	-1.327	-1.072	0.588	0.88	-1.214	-2.376	0.267	-0.168	-1.623	-1.747	0.388	0.463	-0.346	0.618	-1.752	-0.524
establishment of cellular localization	-0.702	2.289	3.254	8.851	4.326	-0.574	10.252	-0.562	-0.491	0.05	1.094	-0.382	-2.516	-0.29	-0.405	-3.335	-0.646	-0.61	-0.508	-0.799	-0.163	-1.102	-1.061	-2.671	-5.469	-0.742	-1.545	-2.471	-1.881	0.132	-1.996	-1.579	-1.387	-2.565	-1.118
establishment of chromatin silencing	-0.039	-0.122	-0.23	-0.153	-0.185	-0.032	-0.163	-0.18	-0.226	-0.228	-0.386	-0.16	-0.181	-0.239	-0.175	-0.299	-0.252	-0.269	-0.204	-0.189	-0.153	-0.213	-0.235	-0.312	1.836	-0.187	-0.218	-0.231	-0.317	-0.226	-0.261	-0.232	-0.211	-0.249	-0.187
establishment of localization	-1.217	1.167	1.022	6.123	5.301	-0.994	6.172	0.628	1.34	0.538	-1.273	-0.057	-1.347	-0.025	0.358	-4.205	1.589	1.957	-0.796	-0.343	0.319	0.42	-0.666	2.566	1.974	1.354	-0.046	2.788	2.596	2.447	0.693	1.004	2.402	3.332	1.616
establishment of mitotic spindle localization	-0.095	-0.298	-0.563	-0.375	1.824	-0.078	-0.4	-0.338	-0.423	-0.427	-0.722	-0.299	-0.34	-0.448	-0.327	-0.559	-0.471	-0.504	-0.381	-0.353	-0.285	-0.399	-0.44	-0.583	-0.901	-0.35	-0.408	-0.432	-0.593	-0.423	-0.489	-0.434	-0.396	-0.467	-0.35
establishment of mitotic spindle orientation	-0.095	-0.298	-0.563	-0.375	1.824	-0.078	-0.4	-0.338	-0.423	-0.427	-0.722	-0.299	-0.34	-0.448	-0.327	-0.559	-0.471	-0.504	-0.381	-0.353	-0.285	-0.399	-0.44	-0.583	-0.901	-0.35	-0.408	-0.432	-0.593	-0.423	-0.489	-0.434	-0.396	-0.467	-0.35
establishment of nucleus localization	-0.129	-0.404	0.621	-0.509	-0.616	-0.105	1.357	1.655	-0.598	-0.605	0.032	-0.423	-0.481	-0.634	-0.463	0.532	-0.666	-0.713	-0.54	-0.5	-0.404	1.251	1.031	0.448	-0.398	1.567	1.202	1.07	1.669	2.84	2.308	1.062	-0.56	-0.66	1.566
establishment of organelle localization	-0.151	-0.472	0.294	-0.594	0.723	-0.123	0.994	1.275	-0.697	-0.705	-0.286	-0.494	-0.56	-0.739	-0.54	0.214	-0.777	-0.832	-0.629	-0.583	-0.471	0.902	0.694	0.132	-0.733	1.194	0.856	0.732	1.176	2.256	1.77	0.723	-0.653	-0.77	1.193
establishment of protein localization	-0.584	2.269	2.664	4.29	4.658	-0.478	5.968	-0.771	-0.339	-0.406	0.859	-1.248	-2.525	-0.02	-1.091	-3.618	-0.656	-0.782	-0.518	-1.796	-1.1	-1.486	-1.251	-2.779	-4.556	-1.338	-1.943	-2.186	-1.854	-0.69	-2.715	-2.544	-2.195	-2.512	-1.34
establishment of RNA localization	-0.241	-0.754	-1.423	0.14	-0.24	-0.197	-1.011	-1.058	-1.324	-0.564	-0.822	-0.938	-1.065	-1.405	-1.026	-1.753	-1.476	-1.58	-1.196	-1.108	-0.895	-1.251	-1.38	-1.828	-2.825	-1.096	-1.278	-1.355	-1.859	-1.325	-1.531	-1.361	-1.24	-1.463	-1.096
establishment of spindle localization	-0.095	-0.298	-0.563	-0.375	1.824	-0.078	-0.4	-0.338	-0.423	-0.427	-0.722	-0.299	-0.34	-0.448	-0.327	-0.559	-0.471	-0.504	-0.381	-0.353	-0.285	-0.399	-0.44	-0.583	-0.901	-0.35	-0.408	-0.432	-0.593	-0.423	-0.489	-0.434	-0.396	-0.467	-0.35
establishment of spindle orientation	-0.095	-0.298	-0.563	-0.375	1.824	-0.078	-0.4	-0.338	-0.423	-0.427	-0.722	-0.299	-0.34	-0.448	-0.327	-0.559	-0.471	-0.504	-0.381	-0.353	-0.285	-0.399	-0.44	-0.583	-0.901	-0.35	-0.408	-0.432	-0.593	-0.423	-0.489	-0.434	-0.396	-0.467	-0.35
eta DNA polymerase activity	-0.039	-0.122	-0.23	-0.153	-0.185	-0.032	-0.163	-0.127	-0.16	-0.161	-0.273	-0.113	-0.128	-0.169	-0.124	-0.211	-0.178	-0.19	-0.144	-0.134	-0.108	-0.151	-0.166	-0.22	2.937	-0.132	-0.154	-0.163	-0.224	-0.16	-0.185	-0.164	-0.149	-0.176	-0.132
ethanol fermentation	-0.055	-0.172	-0.325	-0.217	-0.262	-0.045	-0.231	-0.221	-0.276	-0.28	-0.473	-0.196	-0.222	-0.293	-0.214	-0.366	-0.308	-0.33	-0.25	-0.231	-0.187	-0.261	-0.288	-0.382	1.303	-0.229	3.572	-0.283	2.319	-0.277	2.916	-0.284	-0.259	3.072	-0.229
ethanol metabolism	-0.095	-0.298	-0.563	-0.375	-0.455	-0.078	-0.4	-0.338	-0.423	-0.427	-0.722	-0.299	-0.34	1.849	-0.327	-0.559	1.722	1.554	2.298	2.53	-0.285	-0.399	-0.44	1.217	2.817	-0.35	2.107	1.945	2.952	-0.423	1.631	-0.434	-0.396	1.745	-0.35
ethanolamine and derivative metabolism	-0.067	-0.211	-0.398	-0.265	-0.321	-0.055	-0.283	-0.255	-0.319	-0.323	-0.546	-0.226	-0.257	-0.339	-0.247	-0.423	-0.356	-0.381	-0.288	-0.267	-0.216	-0.301	-0.333	1.94	0.958	3.589	3.017	2.817	-0.448	-0.319	-0.369	-0.328	-0.299	-0.353	-0.264
ethanolamine biosynthesis	-0.067	-0.211	-0.398	-0.265	-0.321	-0.055	-0.283	-0.255	-0.319	-0.323	-0.546	-0.226	-0.257	-0.339	-0.247	-0.423	-0.356	-0.381	-0.288	-0.267	-0.216	-0.301	-0.333	1.94	0.958	3.589	3.017	2.817	-0.448	-0.319	-0.369	-0.328	-0.299	-0.353	-0.264
ethanolamine kinase activity	-0.039	-0.122	-0.23	-0.153	-0.185	-0.032	-0.163	-0.127	-0.16	-0.161	-0.273	-0.113	-0.128	-0.169	-0.124	-0.211	-0.178	-0.19	-0.144	-0.134	-0.108	-0.151	-0.166	-0.22	-0.34	-0.132	-0.154	-0.163	-0.224	-0.16	-0.185	-0.164	-0.149	-0.176	-0.132
ethanolamine metabolism	-0.067	-0.211	-0.398	-0.265	-0.321	-0.055	-0.283	-0.255	-0.319	-0.323	-0.546	-0.226	-0.257	-0.339	-0.247	-0.423	-0.356	-0.381	-0.288	-0.267	-0.216	-0.301	-0.333	1.94	0.958	3.589	3.017	2.817	-0.448	-0.319	-0.369	-0.328	-0.299	-0.353	-0.264
ethanolamine-phosphate cytidylyltransferase activity	-0.039	-0.122	-0.23	-0.153	-0.185	-0.032	-0.163	-0.127	-0.16	-0.161	-0.273	-0.113	-0.128	-0.169	-0.124	-0.211	-0.178	-0.19	-0.144	-0.134	-0.108	-0.151	-0.166	-0.22	-0.34	-0.132	-0.154	-0.163	-0.224	-0.16	-0.185	-0.164	-0.149	-0.176	-0.132
ethanolaminephosphotransferase activity	-0.039	-0.122	-0.23	-0.153	-0.185	-0.032	-0.163	-0.127	-0.16	-0.161	-0.273	-0.113	-0.128	-0.169	-0.124	-0.211	-0.178	-0.19	-0.144	-0.134	-0.108	-0.151	-0.166	-0.22	-0.34	-0.132	-0.154	-0.163	-0.224	-0.16	-0.185	-0.164	-0.149	-0.176	-0.132
ether hydrolase activity	-0.039	-0.122	-0.23	-0.153	-0.185	-0.032	-0.163	-0.127	-0.16	-0.161	-0.273	-0.113	-0.128	-0.169	-0.124	-0.211	-0.178	-0.19	-0.144	-0.134	-0.108	-0.151	-0.166	-0.22	-0.34	-0.132	-0.154	-0.163	-0.224	-0.16	-0.185	-0.164	-0.149	-0.176	-0.132
eukaryotic 43S preinitiation complex	-0.28	-0.875	0.286	-0.159	-1.333	-0.228	-1.173	-1.074	-1.344	-0.595	1.494	-0.945	-1.081	-1.415	-0.039	-1.779	-1.498	-1.604	-1.205	-0.193	-0.902	2.813	2.317	-0.71	-2.079	1.697	1.129	-0.604	-0.195	1.747	1.817	-0.612	-0.421	-0.077	0.762
eukaryotic 48S initiation complex	-0.274	-0.858	0.358	-0.119	-1.306	-0.224	-1.15	-0.993	-1.243	-0.433	1.966	-0.873	-1	-1.308	0.12	-1.645	-1.386	-1.483	-1.113	-0.033	-0.833	3.231	2.716	-0.48	-1.801	2.006	1.422	-0.438	0.08	2.093	2.2	-0.446	-0.259	0.146	0.996
eukaryotic translation elongation factor 1 complex	-0.055	-0.172	-0.325	-0.217	-0.262	-0.045	-0.231	-0.221	-0.276	-0.28	-0.473	-0.196	-0.222	-0.293	-0.214	-0.366	-0.308	-0.33	-0.25	-0.231	-0.187	-0.261	-0.288	-0.382	-0.59	-0.229	-0.267	-0.283	-0.388	-0.277	-0.32	-0.284	-0.259	-0.305	-0.229
eukaryotic translation initiation factor 2 complex								-0.221	-0.276	-0.28	-0.473	-0.196	-0.222	-0.293	-0.214	-0.366	-0.308	-0.33	-0.25	-0.231	-0.187	-0.261	-0.288	-0.382	-0.59	-0.229	-0.267	-0.283	-0.388	-0.277	-0.32	-0.284	-0.259	-0.305	-0.229
eukaryotic translation initiation factor 2alpha kinase activity	-0.039	-0.122	-0.23	-0.153	-0.185	-0.032	-0.163	-0.127	-0.16	-0.161	-0.273	-0.113	-0.128	-0.169	-0.124	-0.211	-0.178	-0.19	-0.144	-0.134	-0.108	-0.151	-0.166	-0.22	-0.34	-0.132	-0.154	-0.163	-0.224	-0.16	-0.185	-0.164	-0.149	-0.176	-0.132
eukaryotic translation initiation factor 2B complex	-0.055	-0.172	-0.325	-0.217	-0.262	-0.045	-0.231	-0.312	-0.391	-0.396	-0.668	-0.277	-0.314	-0.415	-0.303	-0.518	-0.436	-0.467	-0.353	-0.327	-0.264	-0.369	-0.408	-0.54	-0.834	-0.324	-0.377	-0.4	-0.549	-0.391	-0.452	-0.402	-0.366	-0.432	-0.324
eukaryotic translation initiation factor 3 complex	-0.055	-0.172	-0.325	-0.217	-0.262	-0.045	-0.231	-0.338	-0.423	-0.427	-0.722	-0.299	-0.34	-0.448	-0.327	-0.559	-0.471	-0.504	-0.381	-0.353	-0.285	-0.399	-0.44	-0.583	-0.901	-0.35	-0.408	-0.432	-0.593	-0.423	-0.489	-0.434	-0.396	-0.467	-0.35
eukaryotic translation initiation factor 4F complex	-0.078	-0.244	-0.46	-0.306	-0.371	-0.064	-0.327	-0.285	-0.357	-0.361	-0.61	-0.253	-0.287	-0.379	-0.277	-0.473	-0.398	-0.426	-0.322	-0.299	-0.241	-0.337	-0.372	-0.493	-0.762	-0.295	-0.344	-0.365	-0.501	-0.357	-0.413	-0.367	-0.334	-0.394	-0.295
exocyst								-0.361	-0.452	-0.457	-0.772	-0.32	-0.363	-0.479	-0.35	-0.598	-0.504	-0.539	-0.408	-0.378	-0.305	-0.427	-0.471	-0.624	-0.964	-0.374	-0.436	-0.462	-0.634	-0.452	-0.522	-0.464	-0.423	-0.499	-0.374
exocytosis	-0.17	3.301	3.211	5.476	8.167	-0.139	5.072	-0.768	-0.961	0.091	-0.325	-0.681	-0.772	-0.003	-0.744	-1.272	-0.101	-0.237	-0.867	-0.804	-0.649	-0.907	-1.001	-1.326	-1.501	-0.795	-0.927	-0.983	-1.349	-0.961	-1.111	-0.987	-0.9	-1.061	-0.795
exodeoxyribonuclease activity	-0.039	-0.122	-0.23	-0.153	-0.185	-0.032	-0.163	-0.18	-0.226	-0.228	-0.386	-0.16	-0.181	-0.239	-0.175	-0.299	-0.252	-0.269	-0.204	-0.189	-0.153	-0.213	4.135	-0.312	-0.482	-0.187	-0.218	-0.231	-0.317	-0.226	-0.261	-0.232	-0.211	-0.249	-0.187
exodeoxyribonuclease activity\, producing 5????-phosphomonoesters								-0.127	-0.16	-0.161	-0.273	-0.113		-0.169	-0.124	-0.211	-0.178	-0.19	-0.144	-0.134	-0.108	-0.151	-0.166	-0.22	-0.34	-0.132	-0.154	-0.163	-0.224	-0.16	-0.185	-0.164	-0.149	-0.176	-0.132
exodeoxyribonuclease activity\, producing 5¢®?-phosphomonoesters	-0.055	-0.172	-0.325	-0.217	-0.262	-0.045	-0.231
exonuclease activity	-0.129	-0.404	3.388	5.542	1.068	-0.105	3.256	-0.799	-1	-1.012	0.189	-0.708	0.469	-1.061	-0.775	2.65	-1.115	-1.194	-0.903	-0.837	-0.676	-0.944	-0.049	-1.381	-1.08	-0.828	-0.965	-1.024	-1.404	-1	-0.256	-1.028	-0.937	-1.105	-0.828
exonuclease activity\, active with either ribo- or deoxyribonucleic acids and producing 5????-phosphomonoesters								-0.639	-0.8	-0.809	0.212	-0.567		-0.848	-0.62	1.915	-0.892	-0.954	-0.722	-0.669	-0.54	-0.755	-0.833	-1.104	-1.049	-0.662	-0.772	-0.818	-1.123	-0.8	0.198	-0.822	-0.749	-0.883	-0.662
exonuclease activity\, active with either ribo- or deoxyribonucleic acids and producing 5¢®?-phosphomonoesters	-0.179	-0.559	1.952	3.681	0.368	-0.146	2.002
exopeptidase activity	-0.187	-0.586	-1.105	-0.737	-0.892	-0.153	-0.785	1.053	0.576	0.552	-0.488	1.329	-0.617	0.456	1.121	-1.015	0.357	0.222	0.788	0.951	1.442	0.694	0.492	0.93	-0.951	0.975	0.649	-0.785	0.882	0.575	0.284	0.521	3.57	2.819	0.975
exopolyphosphatase activity								-0.127	-0.16	-0.161	-0.273	-0.113	-0.128	-0.169	-0.124	-0.211	-0.178	-0.19	-0.144	-0.134	-0.108	-0.151	-0.166	-0.22	-0.34	-0.132	-0.154	-0.163	-0.224	-0.16	-0.185	-0.164	-0.149	-0.176	-0.132
exoribonuclease activity	-0.123	-0.385	3.625	5.861	1.179	-0.101	3.466	-0.626	-0.784	-0.793	0.272	-0.555	-0.63	-0.831	-0.607	1.998	-0.873	-0.935	-0.707	-0.656	-0.529	-0.74	-0.816	-1.082	-1.001	-0.648	-0.756	-0.802	-1.1	-0.784	0.24	-0.805	-0.734	-0.865	-0.649
exoribonuclease activity\, producing 5????-phosphomonoesters								-0.626	-0.784	-0.793	0.272	-0.555		-0.831	-0.607	1.998	-0.873	-0.935	-0.707	-0.656	-0.529	-0.74	-0.816	-1.082	-1.001	-0.648	-0.756	-0.802	-1.1	-0.784	0.24	-0.805	-0.734	-0.865	-0.649
exoribonuclease activity\, producing 5¢®?-phosphomonoesters	-0.123	-0.385	3.625	5.861	1.179	-0.101	3.466
exoribonuclease II activity	-0.039	-0.122	-0.23	-0.153	-0.185	-0.032	-0.163	-0.127	-0.16	-0.161	-0.273	-0.113	-0.128	-0.169	-0.124	-0.211	-0.178	-0.19	-0.144	-0.134	-0.108	-0.151	-0.166	-0.22	2.937	-0.132	-0.154	-0.163	-0.224	-0.16	-0.185	-0.164	-0.149	-0.176	-0.132
exosome (RNase complex)	-0.067	-0.211	-0.398	-0.265	-0.321	-0.055	-0.283	-0.46	-0.576	-0.583	1.203	-0.408	-0.463	-0.611	-0.446	3.357	-0.642	-0.687	-0.52	-0.482	-0.389	-0.544	-0.6	-0.795	-1.229	-0.477	-0.556	-0.59	-0.809	-0.576	0.89	-0.592	-0.539	-0.636	-0.477
external encapsulating structure	-0.431	0.203	0.441	1.412	4.175	2.582	-0.052	-0.686	-1.185	-0.628	1.311	-0.434	0.757	0.351	-0.621	-0.077	-0.38	-0.618	-0.3	1.318	0.525	1.443	0.423	0.612	1.335	-0.052	0.732	2.229	0.524	1.769	0.523	1.055	3.37	1.804	2.072
external encapsulating structure organization and biogenesis	-0.406	-0.45	-1.946	-0.941	-0.837	-0.331	-0.465	-0.132	0.332	0.836	-0.848	0.986	2.592	0.096	-0.756	0.919	-0.102	0.096	1.357	2.376	-0.467	-1.787	-1.437	-0.141	-0.349	-0.899	-1.826	0.24	-0.222	-1.337	-2.188	0.224	0.004	0.441	-0.233
external side of endosome membrane	-0.039	-0.122	4.353	6.528	5.392	-0.032	6.126	-0.127	-0.16	-0.161	-0.273	-0.113	-0.128	-0.169	-0.124	-0.211	-0.178	-0.19	-0.144	-0.134	-0.108	-0.151	-0.166	-0.22	-0.34	-0.132	-0.154	-0.163	-0.224	-0.16	-0.185	-0.164	-0.149	-0.176	-0.132
extracellular carbohydrate transport	-0.039	-0.122	-0.23	-0.153	-0.185	-0.032	-0.163	-0.127	-0.16	6.194	3.666	-0.113	-0.128	-0.169	-0.124	-0.211	-0.178	-0.19	-0.144	-0.134	-0.108	-0.151	-0.166	-0.22	-0.34	-0.132	-0.154	-0.163	-0.224	-0.16	-0.185	-0.164	-0.149	-0.176	-0.132
extracellular region	-0.161	-0.503	-0.949	-0.633	-0.766	-0.131	-0.674	-0.571	-0.715	3.548	2.307	1.5	2.974	0.602	-0.554	2.377	-0.797	-0.853	2.528	4.525	-0.483	0.845	0.639	0.079	1.411	1.134	0.799	2.085	2.146	0.724	0.428	3.475	2.395	3.141	2.859
extracellular transport	-0.039	-0.122	-0.23	-0.153	-0.185	-0.032	-0.163	-0.127	-0.16	6.194	3.666	-0.113	-0.128	-0.169	-0.124	-0.211	-0.178	-0.19	-0.144	-0.134	-0.108	-0.151	-0.166	-0.22	-0.34	-0.132	-0.154	-0.163	-0.224	-0.16	-0.185	-0.164	-0.149	-0.176	-0.132
extrachromosomal circular DNA	-0.039	-0.122	-0.23	-0.153	-0.185	-0.032	-0.163	-0.127	-0.16	-0.161	-0.273	-0.113	-0.128	-0.169	-0.124	-0.211	-0.178	-0.19	-0.144	-0.134	-0.108	-0.151	-0.166	-0.22	-0.34	-0.132	-0.154	-0.163	-0.224	-0.16	-0.185	-0.164	-0.149	-0.176	-0.132
extrachromosomal circular DNA accumulation during cell aging	-0.039	-0.122	-0.23	-0.153	-0.185	-0.032	-0.163	-0.127	-0.16	-0.161	-0.273	-0.113	-0.128	-0.169	-0.124	-0.211	-0.178	-0.19	-0.144	-0.134	-0.108	-0.151	-0.166	-0.22	-0.34	-0.132	-0.154	-0.163	-0.224	-0.16	-0.185	-0.164	-0.149	-0.176	-0.132
extrachromosomal DNA	-0.039	-0.122	-0.23	-0.153	-0.185	-0.032	-0.163	-0.127	-0.16	-0.161	-0.273	-0.113	-0.128	-0.169	-0.124	-0.211	-0.178	-0.19	-0.144	-0.134	-0.108	-0.151	-0.166	-0.22	-0.34	-0.132	-0.154	-0.163	-0.224	-0.16	-0.185	-0.164	-0.149	-0.176	-0.132
extrinsic to endoplasmic reticulum membrane	-0.039	-0.122	-0.23	-0.153	-0.185	-0.032	-0.163	-0.127	-0.16	-0.161	-0.273	-0.113	-0.128	-0.169	-0.124	-0.211	-0.178	-0.19	-0.144	-0.134	-0.108	-0.151	-0.166	-0.22	-0.34	-0.132	-0.154	-0.163	-0.224	-0.16	-0.185	-0.164	-0.149	-0.176	-0.132
extrinsic to membrane	-0.17	5.217	0.05	0.867	3.037	-0.139	6.518	-0.664	0.408	-0.841	-1.421	-0.589	0.86	-0.882	-0.644	-0.146	0.192	0.058	0.616	0.775	-0.562	0.524	0.326	-0.229	-0.509	0.799	0.481	-0.851	-1.167	0.408	0.12	0.354	0.541	-0.918	2.284
extrinsic to organelle membrane	-0.055	5.722	2.916	4.508	3.682	-0.045	4.217	-0.18	-0.226	-0.228	-0.386	-0.16	-0.181	-0.239	-0.175	-0.299	-0.252	-0.269	-0.204	-0.189	-0.153	-0.213	-0.235	-0.312	-0.482	-0.187	-0.218	-0.231	-0.317	-0.226	-0.261	-0.232	-0.211	-0.249	-0.187
extrinsic to plasma membrane	-0.055	-0.172	-0.325	-0.217	-0.262	-0.045	-0.231	-0.361	1.821	-0.457	-0.772	-0.32	2.439	-0.479	-0.35	1.152	1.548	1.386	2.099	2.319	-0.305	1.974	1.716	1.06	-0.964	2.352	1.916	-0.462	-0.634	1.821	1.46	1.752	1.997	-0.499	2.351
extrinsic to vacuolar membrane	-0.039	8.213	4.353	6.528	5.392	-0.032	6.126	-0.127	-0.16	-0.161	-0.273	-0.113	-0.128	-0.169	-0.124	-0.211	-0.178	-0.19	-0.144	-0.134	-0.108	-0.151	-0.166	-0.22	-0.34	-0.132	-0.154	-0.163	-0.224	-0.16	-0.185	-0.164	-0.149	-0.176	-0.132
FACT complex	-0.039	-0.122	-0.23	-0.153	-0.185	-0.032	-0.163	-0.255	-0.319	-0.323	-0.546	-0.226	-0.257	-0.339	-0.247	-0.423	-0.356	-0.381	-0.288	-0.267	-0.216	-0.301	-0.333	-0.441	-0.681	-0.264	-0.308	-0.327	-0.448	-0.319	-0.369	-0.328	-0.299	-0.353	-0.264
F-actin capping protein complex	-0.055	-0.172	-0.325	-0.217	-0.262	-0.045	-0.231	-0.18	-0.226	-0.228	-0.386	-0.16	-0.181	-0.239	-0.175	-0.299	-0.252	-0.269	-0.204	-0.189	-0.153	-0.213	-0.235	-0.312	-0.482	-0.187	-0.218	-0.231	-0.317	-0.226	-0.261	-0.232	-0.211	-0.249	-0.187
FAD binding	-0.103	-0.322	-0.608	-0.406	-0.491	-0.084	-0.432	-0.338	-0.423	-0.427	-0.722	-0.299	-0.34	-0.448	-0.327	-0.559	-0.471	-0.504	-0.381	-0.353	-0.285	-0.399	4.234	1.217	2.817	-0.35	2.107	-0.432	-0.593	-0.423	1.631	-0.434	-0.396	-0.467	2.563
FAD biosynthesis								-0.127	-0.16	-0.161	-0.273	-0.113	-0.128	-0.169	-0.124	-0.211	-0.178	-0.19	-0.144	-0.134	-0.108	-0.151	-0.166	-0.22	-0.34	-0.132	-0.154	-0.163	-0.224	-0.16	-0.185	-0.164	-0.149	-0.176	-0.132
FAD metabolism								-0.127	-0.16	-0.161	-0.273	-0.113	-0.128	-0.169	-0.124	-0.211	-0.178	-0.19	-0.144	-0.134	-0.108	-0.151	-0.166	-0.22	-0.34	-0.132	-0.154	-0.163	-0.224	-0.16	-0.185	-0.164	-0.149	-0.176	-0.132
FAD transport	-0.039	-0.122	-0.23	-0.153	-0.185	-0.032	-0.163	-0.127	-0.16	-0.161	-0.273	-0.113	-0.128	-0.169	-0.124	-0.211	-0.178	-0.19	-0.144	-0.134	-0.108	-0.151	-0.166	-0.22	-0.34	-0.132	-0.154	-0.163	-0.224	-0.16	-0.185	-0.164	-0.149	-0.176	-0.132
FAD transporter activity	-0.039	-0.122	-0.23	-0.153	-0.185	-0.032	-0.163	-0.127	-0.16	-0.161	-0.273	-0.113	-0.128	-0.169	-0.124	-0.211	-0.178	-0.19	-0.144	-0.134	-0.108	-0.151	-0.166	-0.22	-0.34	-0.132	-0.154	-0.163	-0.224	-0.16	-0.185	-0.164	-0.149	-0.176	-0.132
FADH2 metabolism								-0.18	-0.226	-0.228	-0.386	-0.16	-0.181	-0.239	-0.175	-0.299	-0.252	-0.269	-0.204	-0.189	-0.153	-0.213	-0.235	-0.312	-0.482	-0.187	-0.218	-0.231	-0.317	-0.226	-0.261	-0.232	-0.211	-0.249	-0.187
farnesyl diphosphate biosynthesis								-0.127	-0.16	-0.161	3.666	-0.113	-0.128	-0.169	-0.124	-0.211	-0.178	-0.19	-0.144	-0.134	-0.108	-0.151	-0.166	-0.22	-0.34	-0.132	-0.154	-0.163	-0.224	-0.16	-0.185	-0.164	-0.149	-0.176	-0.132
farnesyl diphosphate metabolism								-0.127	-0.16	-0.161	3.666	-0.113	-0.128	-0.169	-0.124	-0.211	-0.178	-0.19	-0.144	-0.134	-0.108	-0.151	-0.166	-0.22	-0.34	-0.132	-0.154	-0.163	-0.224	-0.16	-0.185	-0.164	-0.149	-0.176	-0.132
farnesyl-diphosphate farnesyltransferase activity								-0.127	-0.16	-0.161	-0.273	-0.113	-0.128	-0.169	-0.124	-0.211	-0.178	-0.19	-0.144	-0.134	-0.108	-0.151	-0.166	-0.22	-0.34	-0.132	-0.154	-0.163	-0.224	-0.16	-0.185	-0.164	-0.149	-0.176	-0.132
farnesyltranstransferase activity	-0.055	-0.172	-0.325	-0.217	3.682	-0.045	-0.231	-0.221	-0.276	-0.28	-0.473	-0.196	-0.222	-0.293	-0.214	-0.366	-0.308	-0.33	-0.25	-0.231	-0.187	-0.261	-0.288	-0.382	-0.59	-0.229	-0.267	-0.283	-0.388	-0.277	-0.32	-0.284	-0.259	-0.305	-0.229
fatty acid beta-oxidation	-0.095	-0.298	-0.563	-0.375	-0.455	-0.078	-0.4	-0.312	4.857	4.796	0.94	-0.277	-0.314	4.548	-0.303	1.502	4.301	1.756	5.434	5.9	3.567	-0.369	-0.408	-0.54	-0.834	-0.324	-0.377	-0.4	-0.549	-0.391	-0.452	-0.402	-0.366	-0.432	-0.324
fatty acid binding	-0.039	-0.122	-0.23	-0.153	-0.185	-0.032	-0.163	-0.127	-0.16	-0.161	-0.273	-0.113	-0.128	-0.169	-0.124	-0.211	-0.178	-0.19	-0.144	-0.134	-0.108	-0.151	-0.166	-0.22	-0.34	-0.132	-0.154	-0.163	-0.224	-0.16	-0.185	-0.164	-0.149	-0.176	-0.132
fatty acid biosynthesis	-0.129	2.112	3.388	-0.509	-0.616	-0.105	-0.542	-0.526	-0.659	0.877	5.571	-0.467	-0.514	-0.699	-0.511	-0.872	-0.735	-0.786	-0.577	-0.535	-0.432	-0.622	-0.687	-0.91	-0.61	1.326	-0.636	-0.674	1.352	-0.659	-0.762	-0.657	-0.599	0.758	-0.529
fatty acid catabolism	-0.039	-0.122	-0.23	-0.153	-0.185	-0.032	-0.163	-0.127	-0.16	-0.161	-0.273	-0.113	-0.128	-0.169	-0.124	-0.211	-0.178	-0.19	-0.144	-0.134	-0.108	-0.151	-0.166	-0.22	-0.34	-0.132	-0.154	-0.163	-0.224	-0.16	-0.185	-0.164	-0.149	-0.176	-0.132
fatty acid desaturation								-0.127	-0.16	6.194	3.666	-0.113	-0.128	-0.169	-0.124	-0.211	-0.178	-0.19	-0.144	-0.134	-0.108	-0.151	-0.166	-0.22	-0.34	-0.132	-0.154	-0.163	-0.224	-0.16	-0.185	-0.164	-0.149	-0.176	-0.132
fatty acid elongase activity	-0.067	4.602	-0.398	-0.265	-0.321	-0.055	-0.283	-0.221	-0.276	-0.28	4.077	-0.196	-0.222	-0.293	-0.214	-0.366	-0.308	-0.33	-0.25	-0.231	-0.187	-0.261	-0.288	-0.382	-0.59	-0.229	-0.267	-0.283	-0.388	-0.277	-0.32	-0.284	-0.259	-0.305	-0.229
fatty acid elongation	-0.039	-0.122	-0.23	-0.153	-0.185	-0.032	-0.163	-0.255	-0.319	-0.323	5.364	-0.226	-0.257	-0.339	-0.247	-0.423	-0.356	-0.381	-0.288	-0.267	-0.216	-0.301	-0.333	-0.441	-0.681	-0.264	-0.308	-0.327	-0.448	-0.319	-0.369	-0.328	-0.299	-0.353	-0.264
fatty acid elongation\, unsaturated fatty acid	-0.078	3.925	-0.46	-0.306	-0.371	-0.064	-0.327	-0.127	-0.16	-0.161	-0.273	-0.113	-0.128	-0.169	-0.124	-0.211	-0.178	-0.19	-0.144	-0.134	-0.108	-0.151	-0.166	-0.22	-0.34	-0.132	-0.154	-0.163	-0.224	-0.16	-0.185	-0.164	-0.149	-0.176	-0.132
fatty acid metabolism	-0.25	0.525	0.68	-0.986	-1.194	-0.204	-0.063	-0.906	0.692	1.562	4.218	-0.803	-0.902	0.524	-0.878	-0.798	0.384	-0.58	1.02	1.249	0.588	-1.071	-1.181	-1.565	-1.022	1.251	-0.149	-0.267	-0.26	-1.134	-1.311	-1.153	-1.051	-0.4	0.176
fatty acid oxidation	-0.103	-0.322	-0.608	-0.406	-0.491	-0.084	-0.432	-0.338	4.437	4.379	0.768	-0.299	-0.34	4.147	-0.327	1.311	3.915	1.554	4.977	5.412	3.262	-0.399	-0.44	-0.583	-0.901	-0.35	-0.408	-0.432	-0.593	-0.423	-0.489	-0.434	-0.396	-0.467	-0.35
fatty acid synthase complex								-0.127	-0.16	-0.161	3.666	-0.113	-0.128	-0.169	-0.124	-0.211	-0.178	-0.19	-0.144	-0.134	-0.108	-0.151	-0.166	-0.22	-0.34	-0.132	-0.154	-0.163	-0.224	-0.16	-0.185	-0.164	-0.149	-0.176	-0.132
fatty acid transport	-0.055	-0.172	-0.325	-0.217	-0.262	-0.045	-0.231	-0.255	2.894	2.856	-0.546	-0.226	-0.257	2.7	-0.247	-0.423	2.544	-0.381	-0.288	-0.267	-0.216	-0.301	-0.333	1.94	0.958	-0.264	-0.308	-0.327	-0.448	-0.319	-0.369	-0.328	-0.299	-0.353	-0.264
fatty acid transporter activity	-0.078	-0.244	-0.46	-0.306	-0.371	-0.064	-0.327	-0.18	-0.226	-0.228	-0.386	-0.16	-0.181	-0.239	-0.175	-0.299	-0.252	-0.269	-0.204	-0.189	-0.153	-0.213	-0.235	-0.312	-0.482	-0.187	-0.218	-0.231	-0.317	-0.226	-0.261	-0.232	-0.211	-0.249	-0.187
fatty-acid ligase activity	-0.078	-0.244	-0.46	-0.306	-0.371	-0.064	-0.327	-0.285	-0.357	-0.361	1.152	-0.253	-0.287	-0.379	-0.277	-0.473	-0.398	-0.426	-0.322	-0.299	-0.241	-0.337	-0.372	-0.493	-0.762	-0.295	-0.344	-0.365	-0.501	-0.357	-0.413	-0.367	-0.334	-0.394	-0.295
fatty-acid synthase activity	-0.103	2.83	2.859	-0.406	-0.491	-0.084	-0.432	-0.383	-0.479	-0.485	4.437	-0.339	-0.385	-0.508	-0.371	-0.634	-0.534	-0.572	-0.433	-0.401	-0.324	-0.452	-0.499	-0.661	-1.022	-0.396	-0.462	-0.49	-0.673	-0.479	-0.554	-0.492	-0.449	-0.529	-0.397
fatty-acyl-CoA synthase activity								-0.18	-0.226	-0.228	5.185	-0.16	-0.181	-0.239	-0.175	-0.299	-0.252	-0.269	-0.204	-0.189	-0.153	-0.213	-0.235	-0.312	-0.482	-0.187	-0.218	-0.231	-0.317	-0.226	-0.261	-0.232	-0.211	-0.249	-0.187
fermentation	-0.123	-0.385	0.724	-0.485	-0.587	-0.101	1.474	-0.423	-0.53	1.382	-0.906	-0.375	-0.426	-0.562	-0.411	-0.701	-0.591	-0.632	-0.478	-0.443	-0.358	-0.5	-0.552	-0.731	1.837	-0.438	1.495	-0.542	2.085	-0.53	1.079	1.346	1.568	2.945	-0.439
ferredoxin reductase activity								-0.127	-0.16	-0.161	-0.273	-0.113	-0.128	-0.169	-0.124	-0.211	-0.178	-0.19	-0.144	-0.134	-0.108	-0.151	-0.166	-0.22	-0.34	-0.132	-0.154	-0.163	-0.224	-0.16	-0.185	-0.164	-0.149	-0.176	-0.132
ferric iron binding	-0.039	-0.122	-0.23	-0.153	-0.185	-0.032	-0.163	-0.127	-0.16	-0.161	-0.273	-0.113	-0.128	-0.169	-0.124	-0.211	-0.178	-0.19	-0.144	-0.134	-0.108	-0.151	-0.166	-0.22	-0.34	-0.132	-0.154	-0.163	-0.224	-0.16	-0.185	-0.164	-0.149	-0.176	-0.132
ferric iron transport	-0.039	-0.122	-0.23	-0.153	-0.185	-0.032	-0.163	-0.127	-0.16	-0.161	-0.273	-0.113	-0.128	-0.169	-0.124	-0.211	-0.178	-0.19	-0.144	-0.134	-0.108	-0.151	-0.166	-0.22	-0.34	-0.132	-0.154	-0.163	-0.224	6.265	5.419	-0.164	-0.149	-0.176	-0.132
ferric-chelate reductase activity	-0.103	-0.322	-0.608	-0.406	1.619	-0.084	-0.432	-0.338	2.007	1.976	2.257	-0.299	5.652	1.849	5.883	3.181	1.722	1.554	-0.381	-0.353	3.262	-0.399	1.897	1.217	0.338	2.564	2.107	1.945	1.18	6.866	5.869	6.672	7.366	1.745	2.563
ferric-enterobactin transport	-0.039	-0.122	-0.23	-0.153	-0.185	-0.032	-0.163	-0.127	-0.16	-0.161	-0.273	-0.113	-0.128	-0.169	-0.124	-0.211	-0.178	-0.19	-0.144	-0.134	-0.108	-0.151	-0.166	-0.22	-0.34	-0.132	-0.154	-0.163	-0.224	6.265	5.419	-0.164	-0.149	-0.176	-0.132
ferric-enterobactin transporter activity	-0.039	-0.122	-0.23	-0.153	-0.185	-0.032	-0.163	-0.127	-0.16	-0.161	-0.273	-0.113	-0.128	-0.169	-0.124	-0.211	-0.178	-0.19	-0.144	-0.134	-0.108	-0.151	-0.166	-0.22	-0.34	-0.132	-0.154	-0.163	-0.224	6.265	5.419	-0.164	-0.149	-0.176	-0.132
ferrochelatase activity	-0.055	-0.172	-0.325	-0.217	-0.262	-0.045	-0.231	-0.18	-0.226	-0.228	2.4	-0.16	-0.181	-0.239	-0.175	-0.299	-0.252	-0.269	-0.204	-0.189	-0.153	-0.213	-0.235	3.054	1.836	-0.187	-0.218	-0.231	2.998	-0.226	-0.261	4.197	-0.211	-0.249	5.26
ferroxidase activity	-0.055	-0.172	-0.325	-0.217	-0.262	-0.045	-0.231	-0.18	-0.226	-0.228	-0.386	-0.16	-0.181	-0.239	-0.175	-0.299	-0.252	-0.269	-0.204	-0.189	-0.153	4.586	4.135	-0.312	-0.482	-0.187	4.484	-0.231	2.998	4.318	3.702	-0.232	-0.211	3.887	5.26
fertilization								-0.18	-0.226	-0.228	-0.386	-0.16	-0.181	-0.239	-0.175	-0.299	-0.252	-0.269	-0.204	-0.189	-0.153	-0.213	-0.235	-0.312	-0.482	-0.187	-0.218	-0.231	-0.317	-0.226	-0.261	-0.232	-0.211	-0.249	-0.187
fertilization (sensu Metazoa)								-0.18	-0.226	-0.228	-0.386	-0.16	-0.181	-0.239	-0.175	-0.299	-0.252	-0.269	-0.204	-0.189	-0.153	-0.213	-0.235	-0.312	-0.482	-0.187	-0.218	-0.231	-0.317	-0.226	-0.261	-0.232	-0.211	-0.249	-0.187
filamentous growth	-0.306	0.117	1.74	-0.344	-0.74	-0.25	-0.473	-1.074	-1.344	-1.36	-1.349	-0.952	0.825	-0.695	-1.041	0.006	-0.801	-0.949	-1.213	-1.124	-0.908	-0.453	-0.657	-0.71	-1.29	-1.112	-0.497	-0.619	-0.195	-0.571	-0.88	-1.381	-1.259	-0.781	-0.186
flap endonuclease activity	-0.078	-0.244	1.833	-0.306	-0.371	-0.064	-0.327	-0.255	-0.319	-0.323	-0.546	-0.226	-0.257	-0.339	-0.247	-0.423	-0.356	-0.381	-0.288	-0.267	-0.216	-0.301	-0.333	-0.441	-0.681	-0.264	-0.308	-0.327	-0.448	-0.319	-0.369	-0.328	-0.299	-0.353	-0.264
flavin reductase activity	-0.039	-0.122	-0.23	-0.153	-0.185	-0.032	-0.163	-0.127	-0.16	-0.161	-0.273	-0.113	-0.128	-0.169	-0.124	-0.211	-0.178	-0.19	-0.144	-0.134	-0.108	-0.151	-0.166	-0.22	-0.34	-0.132	-0.154	-0.163	-0.224	-0.16	-0.185	-0.164	-0.149	-0.176	-0.132
flocculation	-0.087	-0.272	-0.514	-0.343	-0.415	-0.071	-0.365	-0.361	-0.452	-0.457	3.409	-0.32	-0.363	-0.479	-0.35	-0.598	-0.504	-0.539	-0.408	-0.378	-0.305	-0.427	-0.471	-0.624	-0.964	-0.374	-0.436	-0.462	-0.634	-0.452	-0.522	-0.464	-0.423	-0.499	-0.374
flocculation (sensu Saccharomyces)	-0.087	-0.272	-0.514	-0.343	-0.415	-0.071	-0.365	-0.338	-0.423	-0.427	3.747	-0.299	-0.34	-0.448	-0.327	-0.559	-0.471	-0.504	-0.381	-0.353	-0.285	-0.399	-0.44	-0.583	-0.901	-0.35	-0.408	-0.432	-0.593	-0.423	-0.489	-0.434	-0.396	-0.467	-0.35
fluid transport	-0.039	-0.122	-0.23	-0.153	-0.185	-0.032	-0.163	-0.127	-0.16	-0.161	-0.273	-0.113	-0.128	-0.169	-0.124	-0.211	-0.178	-0.19	-0.144	-0.134	-0.108	-0.151	-0.166	-0.22	-0.34	-0.132	-0.154	-0.163	-0.224	-0.16	-0.185	-0.164	-0.149	-0.176	-0.132
FMN adenylyltransferase activity								-0.127	-0.16	-0.161	-0.273	-0.113	-0.128	-0.169	-0.124	-0.211	-0.178	-0.19	-0.144	-0.134	-0.108	-0.151	-0.166	-0.22	-0.34	-0.132	-0.154	-0.163	-0.224	-0.16	-0.185	-0.164	-0.149	-0.176	-0.132
FMN binding	-0.087	-0.272	-0.514	-0.343	2.081	-0.071	-0.365	-0.338	-0.423	-0.427	-0.722	-0.299	-0.34	1.849	2.778	-0.559	1.722	1.554	-0.381	-0.353	-0.285	-0.399	1.897	3.016	4.057	-0.35	-0.408	1.945	1.18	-0.423	1.631	1.935	-0.396	1.745	2.563
FMN biosynthesis								-0.127	-0.16	-0.161	-0.273	-0.113	-0.128	-0.169	-0.124	-0.211	-0.178	-0.19	-0.144	-0.134	-0.108	-0.151	-0.166	-0.22	-0.34	-0.132	-0.154	-0.163	-0.224	-0.16	-0.185	-0.164	-0.149	-0.176	-0.132
FMN metabolism								-0.127	-0.16	-0.161	-0.273	-0.113	-0.128	-0.169	-0.124	-0.211	-0.178	-0.19	-0.144	-0.134	-0.108	-0.151	-0.166	-0.22	-0.34	-0.132	-0.154	-0.163	-0.224	-0.16	-0.185	-0.164	-0.149	-0.176	-0.132
FMN reductase activity	-0.039	-0.122	-0.23	-0.153	-0.185	-0.032	-0.163	-0.127	-0.16	-0.161	-0.273	-0.113	-0.128	-0.169	-0.124	-0.211	-0.178	-0.19	-0.144	-0.134	-0.108	-0.151	-0.166	-0.22	-0.34	-0.132	-0.154	-0.163	-0.224	-0.16	-0.185	-0.164	-0.149	-0.176	-0.132
folic acid and derivative biosynthesis	-0.095	-0.298	-0.563	-0.375	-0.455	-0.078	-0.4	-0.383	-0.479	-0.485	0.495	-0.339	-0.385	-0.508	-0.371	-0.634	-0.534	-0.572	-0.433	-0.401	-0.324	-0.452	-0.499	0.926	0.071	-0.396	-0.462	-0.49	-0.673	-0.479	-0.554	-0.492	-0.449	-0.529	-0.397
folic acid and derivative metabolism	-0.103	-0.322	-0.608	-0.406	-0.491	-0.084	-0.432	-0.423	-0.53	-0.536	0.283	-0.375	-0.426	-0.562	-0.411	-0.701	-0.591	-0.632	-0.478	-0.443	-0.358	-0.5	-0.552	0.705	-0.141	-0.438	-0.511	-0.542	-0.744	-0.53	-0.613	-0.544	-0.496	-0.585	-0.439
folic acid biosynthesis	-0.039	-0.122	-0.23	-0.153	-0.185	-0.032	-0.163	-0.127	-0.16	-0.161	-0.273	-0.113	-0.128	-0.169	-0.124	-0.211	-0.178	-0.19	-0.144	-0.134	-0.108	-0.151	-0.166	-0.22	-0.34	-0.132	-0.154	-0.163	-0.224	-0.16	-0.185	-0.164	-0.149	-0.176	-0.132
folic acid metabolism	-0.039	-0.122	-0.23	-0.153	-0.185	-0.032	-0.163	-0.127	-0.16	-0.161	-0.273	-0.113	-0.128	-0.169	-0.124	-0.211	-0.178	-0.19	-0.144	-0.134	-0.108	-0.151	-0.166	-0.22	-0.34	-0.132	-0.154	-0.163	-0.224	-0.16	-0.185	-0.164	-0.149	-0.176	-0.132
formaldehyde assimilation	-0.039	-0.122	-0.23	-0.153	-0.185	-0.032	-0.163	-0.127	-0.16	-0.161	-0.273	-0.113	-0.128	-0.169	-0.124	-0.211	-0.178	-0.19	-0.144	-0.134	-0.108	-0.151	-0.166	4.539	2.937	-0.132	-0.154	-0.163	-0.224	-0.16	-0.185	-0.164	-0.149	-0.176	-0.132
formaldehyde catabolism	-0.039	-0.122	-0.23	-0.153	-0.185	-0.032	-0.163	-0.127	-0.16	-0.161	-0.273	-0.113	-0.128	-0.169	-0.124	-0.211	-0.178	-0.19	-0.144	-0.134	-0.108	-0.151	-0.166	-0.22	-0.34	-0.132	-0.154	-0.163	-0.224	-0.16	-0.185	-0.164	-0.149	-0.176	-0.132
formaldehyde dehydrogenase (glutathione) activity	-0.039	-0.122	-0.23	-0.153	-0.185	-0.032	-0.163	-0.127	-0.16	-0.161	-0.273	-0.113	-0.128	-0.169	-0.124	-0.211	-0.178	-0.19	-0.144	-0.134	-0.108	-0.151	-0.166	4.539	2.937	-0.132	-0.154	-0.163	-0.224	-0.16	-0.185	-0.164	-0.149	-0.176	-0.132
formaldehyde metabolism	-0.055	-0.172	-0.325	-0.217	-0.262	-0.045	-0.231	-0.18	-0.226	-0.228	-0.386	-0.16	-0.181	-0.239	-0.175	-0.299	-0.252	-0.269	-0.204	-0.189	-0.153	-0.213	-0.235	3.054	1.836	-0.187	-0.218	-0.231	-0.317	-0.226	-0.261	-0.232	-0.211	-0.249	-0.187
formate catabolism								-0.127	-0.16	-0.161	-0.273	-0.113	-0.128	-0.169	-0.124	-0.211	-0.178	-0.19	-0.144	-0.134	-0.108	-0.151	-0.166	-0.22	-0.34	-0.132	-0.154	-0.163	-0.224	-0.16	-0.185	-0.164	-0.149	-0.176	-0.132
formate dehydrogenase activity								-0.127	-0.16	-0.161	-0.273	-0.113	-0.128	-0.169	-0.124	-0.211	-0.178	-0.19	-0.144	-0.134	-0.108	-0.151	-0.166	-0.22	-0.34	-0.132	-0.154	-0.163	-0.224	-0.16	-0.185	-0.164	-0.149	-0.176	-0.132
formate metabolism								-0.127	-0.16	-0.161	-0.273	-0.113	-0.128	-0.169	-0.124	-0.211	-0.178	-0.19	-0.144	-0.134	-0.108	-0.151	-0.166	-0.22	-0.34	-0.132	-0.154	-0.163	-0.224	-0.16	-0.185	-0.164	-0.149	-0.176	-0.132
formate-tetrahydrofolate ligase activity	-0.055	-0.172	-0.325	-0.217	-0.262	-0.045	-0.231	-0.18	-0.226	-0.228	-0.386	-0.16	-0.181	-0.239	-0.175	-0.299	-0.252	-0.269	-0.204	-0.189	-0.153	-0.213	-0.235	-0.312	-0.482	-0.187	-0.218	-0.231	-0.317	-0.226	-0.261	-0.232	-0.211	-0.249	-0.187
formation of catalytic spliceosome for first transesterification step								-0.127	-0.16	-0.161	-0.273	-0.113	-0.128	-0.169	-0.124	-0.211	-0.178	-0.19	-0.144	-0.134	-0.108	-0.151	-0.166	-0.22	-0.34	-0.132	-0.154	-0.163	-0.224	-0.16	-0.185	-0.164	-0.149	-0.176	-0.132
formation of catalytic spliceosome for second transesterification step								-0.127	-0.16	-0.161	-0.273	-0.113	-0.128	-0.169	-0.124	-0.211	-0.178	-0.19	-0.144	-0.134	-0.108	-0.151	-0.166	-0.22	-0.34	-0.132	-0.154	-0.163	-0.224	-0.16	-0.185	-0.164	-0.149	-0.176	-0.132
formation of catalytic U2-type spliceosome for second transesterification step								-0.127	-0.16	-0.161	-0.273	-0.113	-0.128	-0.169	-0.124	-0.211	-0.178	-0.19	-0.144	-0.134	-0.108	-0.151	-0.166	-0.22	-0.34	-0.132	-0.154	-0.163	-0.224	-0.16	-0.185	-0.164	-0.149	-0.176	-0.132
fructose 2\,6-bisphosphate metabolism	-0.078	-0.244	4.125	-0.306	-0.371	-0.064	-0.327	-0.255	2.894	-0.323	-0.546	-0.226	-0.257	2.7	-0.247	-0.423	-0.356	5.062	-0.288	-0.267	-0.216	-0.301	-0.333	-0.441	-0.681	-0.264	-0.308	-0.327	-0.448	-0.319	-0.369	-0.328	-0.299	-0.353	-0.264
fructose metabolism	-0.095	-0.298	3.181	-0.375	-0.455	-0.078	-0.4	5.279	4.095	1.791	-0.772	2.85	-0.363	3.82	2.555	-0.598	1.548	5.236	2.099	-0.378	3.013	-0.427	-0.471	-0.624	1.356	-0.374	-0.436	-0.462	-0.634	-0.452	-0.522	-0.464	-0.423	-0.499	-0.374
fructose transporter activity	-0.11	-0.345	-0.65	-0.434	-0.525	-0.09	-0.462	7.749	6.026	4.303	-0.039	6.511	1.55	7.197	5.889	0.459	5.307	4.888	4.936	5.395	6.858	-0.584	0.953	-0.854	1.222	-0.512	-0.597	0.992	1.555	1.042	0.733	-0.636	-0.58	-0.684	-0.512
fructose-2\,6-bisphosphate 2-phosphatase activity	-0.039	-0.122	4.353	-0.153	-0.185	-0.032	-0.163	-0.127	-0.16	-0.161	-0.273	-0.113	-0.128	-0.169	-0.124	-0.211	-0.178	-0.19	-0.144	-0.134	-0.108	-0.151	-0.166	-0.22	-0.34	-0.132	-0.154	-0.163	-0.224	-0.16	-0.185	-0.164	-0.149	-0.176	-0.132
fructose-bisphosphatase activity	-0.039	-0.122	-0.23	-0.153	-0.185	-0.032	-0.163	-0.127	-0.16	-0.161	-0.273	-0.113	-0.128	-0.169	-0.124	-0.211	-0.178	-0.19	-0.144	-0.134	-0.108	-0.151	-0.166	-0.22	-0.34	-0.132	-0.154	-0.163	-0.224	-0.16	-0.185	-0.164	-0.149	-0.176	-0.132
fructose-bisphosphate aldolase activity								-0.127	-0.16	-0.161	-0.273	-0.113		-0.169	-0.124	-0.211	-0.178	-0.19	-0.144	-0.134	0	-0.151	-0.166	4.539	2.937	7.573	6.495	-0.163	4.463	6.265	5.419	6.099	6.691	0	0
fumarate hydratase activity	-0.039	-0.122	-0.23	-0.153	-0.185	-0.032	-0.163	-0.127	-0.16	-0.161	-0.273	-0.113	-0.128	-0.169	-0.124	-0.211	-0.178	-0.19	-0.144	-0.134	-0.108	-0.151	-0.166	-0.22	-0.34	-0.132	-0.154	-0.163	-0.224	-0.16	-0.185	-0.164	-0.149	-0.176	-0.132
fumarate metabolism	-0.039	-0.122	-0.23	-0.153	-0.185	-0.032	-0.163	-0.127	-0.16	-0.161	-0.273	-0.113	-0.128	-0.169	-0.124	-0.211	-0.178	-0.19	-0.144	-0.134	-0.108	-0.151	-0.166	-0.22	-0.34	-0.132	-0.154	-0.163	-0.224	-0.16	-0.185	-0.164	-0.149	-0.176	-0.132
fumarate reductase (NADH) activity	-0.055	-0.172	-0.325	-0.217	-0.262	-0.045	-0.231	-0.18	-0.226	-0.228	-0.386	-0.16	-0.181	-0.239	-0.175	-0.299	-0.252	-0.269	-0.204	-0.189	-0.153	-0.213	-0.235	-0.312	1.836	-0.187	-0.218	-0.231	-0.317	-0.226	-0.261	-0.232	-0.211	-0.249	-0.187
fumarate reductase complex	-0.067	-0.211	-0.398	-0.265	-0.321	-0.055	-0.283	3.731	6.108	-0.323	-0.546	-0.226	-0.257	-0.339	-0.247	-0.423	2.544	10.504	-0.288	-0.267	-0.216	-0.301	-0.333	-0.441	-0.681	-0.264	-0.308	-0.327	-0.448	-0.319	-0.369	-0.328	-0.299	-0.353	-0.264
fumarate transport	-0.039	-0.122	-0.23	-0.153	-0.185	-0.032	-0.163	-0.127	-0.16	-0.161	-0.273	-0.113	-0.128	-0.169	-0.124	-0.211	-0.178	-0.19	-0.144	-0.134	-0.108	-0.151	-0.166	-0.22	2.937	-0.132	-0.154	-0.163	-0.224	-0.16	-0.185	-0.164	-0.149	-0.176	-0.132
fumarate transporter activity	-0.039	-0.122	-0.23	-0.153	-0.185	-0.032	-0.163	-0.127	-0.16	-0.161	-0.273	-0.113	-0.128	-0.169	-0.124	-0.211	-0.178	-0.19	-0.144	-0.134	-0.108	-0.151	-0.166	-0.22	2.937	-0.132	-0.154	-0.163	-0.224	-0.16	-0.185	-0.164	-0.149	-0.176	-0.132
G1 phase	-0.095	3.106	3.181	-0.375	1.824	-0.078	4.739	-0.571	-0.715	-0.723	-0.34	-0.506	-0.575	-0.759	-0.554	0.161	-0.797	-0.853	-0.646	-0.598	-0.483	-0.675	-0.745	-0.987	-1.525	-0.592	-0.69	-0.732	-1.004	-0.715	-0.827	-0.735	-0.67	-0.79	-0.592
G1 phase of mitotic cell cycle	-0.095	3.106	3.181	-0.375	1.824	-0.078	4.739	-0.571	-0.715	-0.723	-0.34	-0.506	-0.575	-0.759	-0.554	0.161	-0.797	-0.853	-0.646	-0.598	-0.483	-0.675	-0.745	-0.987	-1.525	-0.592	-0.69	-0.732	-1.004	-0.715	-0.827	-0.735	-0.67	-0.79	-0.592
G1/S transition of mitotic cell cycle	4.586	-0.658	0.467	0.417	1.077	-0.172	0.29	-0.757	-0.947	1.197	0.385	-0.671	-0.762	1.056	-0.734	-0.415	-0.073	-0.208	0.346	-0.792	0.951	0.256	1.109	-0.501	-0.353	0.523	1.341	0.097	-0.535	0.142	0.805	0.089	0.273	-0.054	1.828
G1/S-specific transcription in mitotic cell cycle	14.797	-0.211	-0.398	-0.265	-0.321	-0.055	-0.283	-0.221	-0.276	-0.28	-0.473	-0.196	-0.222	-0.293	-0.214	-0.366	-0.308	-0.33	-0.25	-0.231	-0.187	-0.261	-0.288	-0.382	-0.59	-0.229	-0.267	-0.283	-0.388	-0.277	-0.32	-0.284	-0.259	-0.305	-0.229
G1-specific transcription in mitotic cell cycle	-0.067	4.602	2.249	-0.265	-0.321	-0.055	-0.283	-0.478	-0.598	-0.605	-1.022	-0.423	-0.481	-0.634	-0.463	-0.791	-0.666	-0.713	-0.54	-0.5	-0.404	-0.565	-0.623	-0.825	-1.275	-0.495	-0.577	-0.612	-0.839	-0.598	-0.691	-0.614	-0.56	-0.66	-0.495
G2 phase	-0.039	-0.122	-0.23	-0.153	-0.185	-0.032	-0.163	-0.127	-0.16	-0.161	-0.273	-0.113	-0.128	-0.169	-0.124	-0.211	-0.178	-0.19	-0.144	-0.134	-0.108	-0.151	-0.166	-0.22	-0.34	-0.132	-0.154	-0.163	-0.224	-0.16	-0.185	-0.164	-0.149	-0.176	-0.132
G2 phase of mitotic cell cycle	-0.039	-0.122	-0.23	-0.153	-0.185	-0.032	-0.163	-0.127	-0.16	-0.161	-0.273	-0.113	-0.128	-0.169	-0.124	-0.211	-0.178	-0.19	-0.144	-0.134	-0.108	-0.151	-0.166	-0.22	-0.34	-0.132	-0.154	-0.163	-0.224	-0.16	-0.185	-0.164	-0.149	-0.176	-0.132
G2/M transition of mitotic cell cycle	-0.156	-0.488	2.523	-0.614	0.654	-0.127	0.921	-0.639	-0.8	-0.809	1.002	-0.567	-0.643	-0.848	-0.62	-1.059	-0.892	-0.954	-0.722	-0.669	-0.54	-0.755	-0.833	-0.15	-0.392	-0.662	-0.772	-0.818	-0.183	-0.8	-0.925	0.434	-0.749	0.289	-0.662
G2/M-specific transcription in mitotic cell cycle								-0.127	-0.16	-0.161	-0.273	-0.113	-0.128	-0.169	-0.124	-0.211	-0.178	-0.19	-0.144	-0.134	-0.108	-0.151	-0.166	-0.22	-0.34	-0.132	-0.154	-0.163	-0.224	-0.16	-0.185	-0.164	-0.149	-0.176	-0.132
G2-specific transcription in mitotic cell cycle	-0.039	-0.122	-0.23	-0.153	-0.185	-0.032	-0.163	-0.127	-0.16	-0.161	-0.273	-0.113	-0.128	-0.169	-0.124	-0.211	-0.178	-0.19	-0.144	-0.134	-0.108	-0.151	-0.166	-0.22	-0.34	-0.132	-0.154	-0.163	-0.224	-0.16	-0.185	-0.164	-0.149	-0.176	-0.132
galactokinase activity	-0.055	-0.172	-0.325	-0.217	-0.262	-0.045	-0.231	-0.18	-0.226	-0.228	-0.386	-0.16	-0.181	-0.239	-0.175	-0.299	-0.252	-0.269	4.806	-0.189	-0.153	-0.213	-0.235	-0.312	-0.482	-0.187	-0.218	-0.231	-0.317	-0.226	-0.261	-0.232	-0.211	-0.249	-0.187
galactose metabolism	-0.129	-0.404	-0.763	-0.509	1.068	-0.105	-0.542	1.982	-0.53	3.3	1.472	-0.375	-0.426	-0.562	-0.411	-0.701	1.159	-0.632	1.66	-0.443	-0.358	-0.5	-0.552	-0.731	-0.141	-0.438	-0.511	-0.542	0.671	-0.53	-0.613	-0.544	-0.496	-0.585	-0.439
galactose transporter activity	-0.078	-0.244	-0.46	-0.306	-0.371	-0.064	-0.327	-0.312	-0.391	2.2	0.94	-0.277	-0.314	-0.415	-0.303	-0.518	-0.436	-0.467	-0.353	-0.327	-0.264	-0.369	-0.408	-0.54	0.504	-0.324	-0.377	-0.4	-0.549	-0.391	-0.452	-0.402	-0.366	-0.432	-0.324
gamma DNA polymerase complex	-0.039	-0.122	-0.23	-0.153	-0.185	-0.032	-0.163	-0.127	-0.16	-0.161	-0.273	-0.113	-0.128	-0.169	-0.124	-0.211	-0.178	-0.19	-0.144	-0.134	-0.108	-0.151	-0.166	-0.22	-0.34	-0.132	-0.154	-0.163	-0.224	-0.16	-0.185	-0.164	-0.149	-0.176	-0.132
gamma DNA-directed DNA polymerase activity	-0.039	-0.122	-0.23	-0.153	-0.185	-0.032	-0.163	-0.127	-0.16	-0.161	-0.273	-0.113	-0.128	-0.169	-0.124	-0.211	-0.178	-0.19	-0.144	-0.134	-0.108	-0.151	-0.166	-0.22	-0.34	-0.132	-0.154	-0.163	-0.224	-0.16	-0.185	-0.164	-0.149	-0.176	-0.132
gamma-aminobutyric acid metabolism	-0.039	-0.122	-0.23	-0.153	-0.185	-0.032	-0.163	-0.127	-0.16	-0.161	-0.273	-0.113	-0.128	5.906	-0.124	-0.211	-0.178	-0.19	-0.144	-0.134	-0.108	-0.151	-0.166	-0.22	-0.34	-0.132	-0.154	-0.163	-0.224	-0.16	-0.185	-0.164	-0.149	-0.176	-0.132
gamma-glutamyltransferase activity	-0.039	-0.122	-0.23	-0.153	-0.185	-0.032	-0.163	-0.127	-0.16	-0.161	-0.273	-0.113	-0.128	-0.169	-0.124	-0.211	-0.178	-0.19	-0.144	-0.134	-0.108	-0.151	-0.166	4.539	2.937	-0.132	-0.154	-0.163	-0.224	-0.16	-0.185	-0.164	-0.149	-0.176	-0.132
gamma-tubulin complex								-0.221	-0.276	-0.28	-0.473	-0.196	-0.222	-0.293	-0.214	-0.366	-0.308	-0.33	-0.25	-0.231	-0.187	-0.261	-0.288	-0.382	-0.59	-0.229	-0.267	-0.283	-0.388	-0.277	-0.32	-0.284	-0.259	-0.305	-0.229
gamma-tubulin complex (sensu Saccharomyces)								-0.221	-0.276	-0.28	-0.473	-0.196	-0.222	-0.293	-0.214	-0.366	-0.308	-0.33	-0.25	-0.231	-0.187	-0.261	-0.288	-0.382	-0.59	-0.229	-0.267	-0.283	-0.388	-0.277	-0.32	-0.284	-0.259	-0.305	-0.229
gamma-tubulin small complex								-0.221	-0.276	-0.28	-0.473	-0.196	-0.222	-0.293	-0.214	-0.366	-0.308	-0.33	-0.25	-0.231	-0.187	-0.261	-0.288	-0.382	-0.59	-0.229	-0.267	-0.283	-0.388	-0.277	-0.32	-0.284	-0.259	-0.305	-0.229
GARP complex	-0.078	-0.244	-0.46	-0.306	2.419	-0.064	9.112	-0.255	-0.319	-0.323	-0.546	-0.226	-0.257	-0.339	-0.247	-0.423	-0.356	-0.381	-0.288	-0.267	-0.216	-0.301	-0.333	-0.441	-0.681	-0.264	-0.308	-0.327	-0.448	-0.319	-0.369	-0.328	-0.299	-0.353	-0.264
gas transport	-0.039	-0.122	-0.23	-0.153	-0.185	-0.032	-0.163	-0.18	-0.226	-0.228	-0.386	-0.16	-0.181	-0.239	-0.175	-0.299	-0.252	-0.269	4.806	5.202	-0.153	-0.213	-0.235	-0.312	1.836	-0.187	-0.218	-0.231	-0.317	-0.226	-0.261	-0.232	-0.211	-0.249	5.26
GDP-dissociation inhibitor activity	-0.039	-0.122	-0.23	-0.153	-0.185	-0.032	-0.163	-0.18	-0.226	-0.228	2.4	-0.16	-0.181	-0.239	-0.175	-0.299	-0.252	-0.269	-0.204	-0.189	-0.153	-0.213	-0.235	-0.312	-0.482	-0.187	-0.218	-0.231	-0.317	-0.226	-0.261	-0.232	-0.211	-0.249	-0.187
GDP-mannose biosynthesis								-0.18	-0.226	-0.228	-0.386	-0.16	-0.181	-0.239	-0.175	-0.299	-0.252	-0.269	-0.204	-0.189	-0.153	-0.213	-0.235	-0.312	-0.482	-0.187	-0.218	-0.231	-0.317	-0.226	-0.261	-0.232	-0.211	-0.249	-0.187
GDP-mannose metabolism								-0.18	-0.226	-0.228	-0.386	-0.16	-0.181	-0.239	-0.175	-0.299	-0.252	-0.269	-0.204	-0.189	-0.153	-0.213	-0.235	-0.312	-0.482	-0.187	-0.218	-0.231	-0.317	-0.226	-0.261	-0.232	-0.211	-0.249	-0.187
gene conversion at mating-type locus	-0.123	-0.385	-0.727	-0.485	-0.587	-0.101	-0.517	-0.404	-0.505	-0.511	-0.863	-0.358	-0.406	-0.536	-0.391	-0.669	-0.563	-0.603	-0.456	-0.423	-0.341	-0.477	-0.526	-0.697	2.034	-0.418	-0.487	-0.517	-0.709	-0.505	-0.584	-0.519	-0.473	-0.558	-0.418
gene silencing	-0.291	0.222	-1.715	-1.144	-0.628	-0.237	0.489	-0.157	0.141	-0.64	0.903	0.083	-1.104	-0.741	-0.096	-1.817	-0.847	-0.997	-1.24	-1.149	-0.928	-1.296	-1.431	-1.895	-2.156	-1.136	-1.325	-1.405	-1.927	-1.373	-1.587	-0.672	-1.286	-1.516	-1.136
general RNA polymerase II transcription factor activity	-0.17	7.134	8.48	-0.669	1.755	-0.139	-0.713	0.008	-0.443	-1.279	-1.154	-0.895	-1.016	-0.565	0.069	-1.673	-0.668	-0.813	-0.236	-0.084	-0.854	-1.193	-1.317	-1.137	-1.859	-1.046	-1.219	-1.293	-1.774	-1.264	-1.461	-1.298	-1.184	-1.396	-1.046
general transcriptional repressor activity	18.148	11.616	6.157	-0.217	3.682	22.246	-0.231	-0.18	-0.226	-0.228	-0.386	-0.16	-0.181	-0.239	-0.175	-0.299	-0.252	-0.269	-0.204	-0.189	-0.153	-0.213	-0.235	-0.312	-0.482	-0.187	-0.218	-0.231	-0.317	-0.226	-0.261	-0.232	-0.211	-0.249	-0.187
generation of precursor metabolites and energy	-0.664	-0.503	-0.168	2.012	-1.408	-0.542	1.57	3.438	3.872	3.762	-1.6	2.93	-1.073	4.686	4.613	-2.319	7.109	9.297	1.695	-0.359	2.776	-1.317	-1.4	1.744	4.292	1.862	1.216	4.008	6.875	0.608	1.255	2.227	3.378	6.609	1.9
geranyltranstransferase activity								-0.127	-0.16	-0.161	3.666	-0.113	-0.128	-0.169	-0.124	-0.211	-0.178	-0.19	-0.144	-0.134	-0.108	-0.151	-0.166	-0.22	-0.34	-0.132	-0.154	-0.163	-0.224	-0.16	-0.185	-0.164	-0.149	-0.176	-0.132
GINS complex								-0.255	-0.319	-0.323	-0.546	-0.226	-0.257	-0.339	-0.247	-0.423	-0.356	-0.381	-0.288	-0.267	-0.216	-0.301	-0.333	-0.441	-0.681	-0.264	-0.308	-0.327	-0.448	-0.319	-0.369	-0.328	-0.299	-0.353	-0.264
glucan 1\,3-beta-glucosidase activity	-0.087	-0.272	-0.514	-0.343	-0.415	-0.071	-0.365	-0.285	-0.357	-0.361	-0.61	-0.253	-0.287	-0.379	-0.277	-0.473	-0.398	-0.426	-0.322	-0.299	-0.241	-0.337	-0.372	1.636	-0.762	-0.295	-0.344	-0.365	-0.501	-0.357	-0.413	-0.367	-0.334	-0.394	-0.295
glucan 1\,4-alpha-glucosidase activity	-0.055	-0.172	-0.325	-0.217	-0.262	-0.045	-0.231	-0.18	-0.226	-0.228	-0.386	-0.16	-0.181	-0.239	-0.175	-0.299	-0.252	-0.269	-0.204	-0.189	-0.153	-0.213	-0.235	-0.312	1.836	-0.187	-0.218	-0.231	-0.317	-0.226	-0.261	-0.232	-0.211	-0.249	-0.187
glucan biosynthesis	-0.165	1.451	-0.977	0.927	0.529	-0.135	-0.694	3	0.724	9.242	1.425	1.5	1.2	7.407	4.964	0.161	3.1	5.241	2.528	1.11	-0.483	-0.675	-0.745	0.079	-0.057	-0.592	-0.69	0.677	1.096	-0.715	-0.827	0.668	0.863	0.52	1.134
glucan catabolism	-0.095	-0.298	-0.563	-0.375	-0.455	-0.078	-0.4	2.677	2.007	6.783	0.768	3.089	-0.34	4.147	2.778	-0.559	1.722	1.554	2.298	-0.353	3.262	-0.399	-0.44	-0.583	0.338	-0.35	-0.408	-0.432	1.18	-0.423	-0.489	-0.434	-0.396	1.745	-0.35
glucan metabolism	-0.21	4.001	-1.241	1.662	2.116	-0.172	0.29	4.65	2.321	7.663	0.385	2.368	0.582	7.237	4.835	-0.415	3.861	5.328	1.547	0.5	0.951	0.256	0.061	-0.501	-0.909	-0.784	-0.914	0.097	0.26	-0.947	-1.095	0.089	1.433	0.937	0.522
glucanosyltransferase activity	-0.039	-0.122	-0.23	-0.153	-0.185	-0.032	-0.163	-0.127	-0.16	-0.161	-0.273	-0.113	-0.128	-0.169	-0.124	-0.211	-0.178	-0.19	-0.144	-0.134	-0.108	-0.151	-0.166	-0.22	-0.34	-0.132	-0.154	-0.163	-0.224	-0.16	-0.185	-0.164	-0.149	-0.176	-0.132
glucokinase activity	-0.039	-0.122	-0.23	-0.153	-0.185	-0.032	-0.163	-0.127	-0.16	-0.161	-0.273	-0.113	-0.128	5.906	-0.124	-0.211	-0.178	5.251	-0.144	-0.134	-0.108	-0.151	-0.166	-0.22	-0.34	-0.132	-0.154	-0.163	-0.224	-0.16	-0.185	-0.164	-0.149	-0.176	-0.132
gluconeogenesis	-0.165	-0.518	-0.977	-0.651	-0.789	-0.135	-0.694	1.157	2.077	0.648	-0.391	-0.519	-0.575	1.879	1.227	0.111	1.719	1.505	0.941	-0.598	1.618	-0.692	-0.764	-1.012	2.02	1.078	-0.707	0.625	1.021	-0.733	-0.847	-0.735	-0.67	0.52	1.134
glucosamine 6-phosphate N-acetyltransferase activity								-0.127	-0.16	-0.161	3.666	-0.113	-0.128	-0.169	-0.124	-0.211	-0.178	-0.19	-0.144	-0.134	-0.108	-0.151	-0.166	-0.22	-0.34	-0.132	-0.154	-0.163	-0.224	-0.16	-0.185	-0.164	-0.149	-0.176	-0.132
glucosamine biosynthesis	-0.11	-0.345	-0.65	-0.434	1.449	-0.09	-0.462	-0.46	-0.576	-0.583	0.109	-0.408	-0.463	-0.611	-0.446	0.611	-0.642	-0.687	-0.52	-0.482	-0.389	-0.544	-0.6	-0.795	-1.229	-0.477	-0.556	-0.59	-0.809	-0.576	-0.666	-0.592	-0.539	-0.636	-0.477
glucosamine catabolism	-0.087	-0.272	-0.514	-0.343	-0.415	-0.071	-0.365	3.281	2.517	2.482	1.152	3.755	3.257	2.339	3.397	1.74	2.196	2.008	2.847	3.112	3.955	-0.337	-0.372	-0.493	-0.762	-0.295	-0.344	-0.365	-0.501	-0.357	-0.413	-0.367	-0.334	-0.394	-0.295
glucosamine metabolism	-0.141	-0.44	-0.83	-0.553	0.88	-0.115	-0.589	1.34	0.839	0.814	0.701	1.635	1.325	0.715	1.413	1.437	0.613	0.475	1.06	1.232	1.756	-0.64	-0.707	-0.936	-1.447	-0.561	-0.654	-0.694	-0.952	-0.678	-0.784	-0.697	-0.635	-0.749	-0.561
glucose 1-phosphate metabolism	-0.055	-0.172	-0.325	-0.217	-0.262	-0.045	-0.231	-0.18	4.318	4.266	5.185	6.176	-0.181	4.057	5.631	-0.299	3.849	3.578	-0.204	-0.189	-0.153	-0.213	-0.235	-0.312	-0.482	-0.187	-0.218	-0.231	-0.317	-0.226	-0.261	-0.232	-0.211	-0.249	-0.187
glucose 1-phosphate utilization	-0.055	-0.172	-0.325	-0.217	-0.262	-0.045	-0.231	-0.18	4.318	4.266	5.185	6.176	-0.181	4.057	5.631	-0.299	3.849	3.578	-0.204	-0.189	-0.153	-0.213	-0.235	-0.312	-0.482	-0.187	-0.218	-0.231	-0.317	-0.226	-0.261	-0.232	-0.211	-0.249	-0.187
glucose 6-phosphate metabolism	-0.055	-0.172	-0.325	-0.217	-0.262	-0.045	-0.231	-0.18	4.318	4.266	5.185	6.176	-0.181	4.057	5.631	-0.299	3.849	3.578	-0.204	-0.189	-0.153	-0.213	-0.235	-0.312	-0.482	-0.187	-0.218	-0.231	-0.317	-0.226	-0.261	-0.232	-0.211	-0.249	-0.187
glucose 6-phosphate utilization	-0.055	-0.172	-0.325	-0.217	-0.262	-0.045	-0.231	-0.18	4.318	4.266	5.185	6.176	-0.181	4.057	5.631	-0.299	3.849	3.578	-0.204	-0.189	-0.153	-0.213	-0.235	-0.312	-0.482	-0.187	-0.218	-0.231	-0.317	-0.226	-0.261	-0.232	-0.211	-0.249	-0.187
glucose binding	-0.055	-0.172	-0.325	-0.217	-0.262	-0.045	-0.231	-0.18	-0.226	-0.228	-0.386	-0.16	-0.181	-0.239	-0.175	-0.299	-0.252	-0.269	-0.204	-0.189	-0.153	-0.213	-0.235	-0.312	-0.482	-0.187	-0.218	-0.231	-0.317	-0.226	-0.261	-0.232	-0.211	-0.249	-0.187
glucose catabolism	-0.224	0.754	-0.524	1.452	-1.07	-0.183	0.158	2.672	1.767	0.782	-0.691	3.262	-0.855	2.445	2.805	-1.439	3.081	3.537	1.185	-0.889	2.248	-1.026	-1.133	0.613	2.534	4.878	2.889	0.749	9.579	1.767	1.232	1.752	4.182	5.909	-0.849
glucose import	-0.039	-0.122	-0.23	-0.153	-0.185	-0.032	-0.163	-0.127	-0.16	-0.161	-0.273	-0.113	-0.128	-0.169	-0.124	-0.211	-0.178	-0.19	-0.144	-0.134	-0.108	-0.151	-0.166	-0.22	-0.34	-0.132	-0.154	-0.163	-0.224	-0.16	-0.185	-0.164	-0.149	-0.176	-0.132
glucose metabolism	-0.309	0.1	-0.063	0.495	-1.472	-0.252	-0.49	3.411	2.977	1.463	-0.18	3.114	-1.127	4.038	3.582	-1.315	3.708	3.891	1.19	-1.172	2.389	-0.567	-0.775	0.754	3.326	4.14	3.18	2.132	8.165	1.511	1.554	2.178	4.22	4.534	0.679
glucose transport	-0.117	-0.366	-0.69	-0.46	-0.557	-0.095	-0.49	4.382	3.434	3.39	-0.473	-0.196	-0.222	-0.293	-0.214	-0.366	3.04	2.812	3.841	-0.231	-0.187	-0.261	-0.288	-0.382	-0.59	-0.229	-0.267	-0.283	-0.388	-0.277	-0.32	-0.284	-0.259	-0.305	-0.229
glucose transporter activity	-0.067	-0.211	-0.398	-0.265	-0.321	-0.055	-0.283	7.471	5.795	5.718	0.88	6.276	1.469	6.927	5.671	0.392	5.094	4.686	4.744	5.191	6.613	-0.604	0.881	-0.883	1.098	-0.529	-0.617	0.92	1.45	0.969	0.664	-0.657	-0.599	-0.706	-0.529
glucose-6-phosphate 1-dehydrogenase activity								-0.127	-0.16	-0.161	-0.273	-0.113	-0.128	-0.169	-0.124	-0.211	-0.178	-0.19	-0.144	-0.134	-0.108	-0.151	-0.166	4.539	2.937	-0.132	-0.154	-0.163	-0.224	-0.16	-0.185	-0.164	-0.149	-0.176	-0.132
glucose-6-phosphate isomerase activity								-0.127	-0.16	-0.161	-0.273	-0.113	-0.128	-0.169	-0.124	-0.211	-0.178	-0.19	-0.144	-0.134	-0.108	-0.151	-0.166	-0.22	-0.34	-0.132	-0.154	-0.163	-0.224	-0.16	-0.185	-0.164	-0.149	-0.176	-0.132
glucosidase activity	-0.151	-0.472	-0.891	-0.594	0.723	-0.123	-0.633	3.222	2.356	2.315	0.701	3.75	3.195	3.584	3.351	1.437	1.982	1.76	2.733	3.032	3.971	0.962	-0.707	0.187	2.422	1.258	-0.654	0.79	1.261	0.838	0.539	-0.697	-0.635	0.632	-0.561
glucoside transport	-0.039	-0.122	-0.23	-0.153	-0.185	-0.032	-0.163	5.456	4.318	4.266	-0.386	-0.16	-0.181	-0.239	-0.175	-0.299	3.849	3.578	4.806	-0.189	-0.153	-0.213	-0.235	-0.312	-0.482	-0.187	-0.218	-0.231	-0.317	-0.226	-0.261	-0.232	-0.211	-0.249	-0.187
glucoside transporter activity	-0.039	-0.122	-0.23	-0.153	-0.185	-0.032	-0.163	5.456	4.318	4.266	-0.386	-0.16	-0.181	-0.239	-0.175	-0.299	3.849	3.578	4.806	-0.189	-0.153	-0.213	-0.235	-0.312	-0.482	-0.187	-0.218	-0.231	-0.317	-0.226	-0.261	-0.232	-0.211	-0.249	-0.187
glucosyltransferase activity	-0.141	1.875	-0.83	1.303	-0.67	-0.115	-0.589	1.655	1.121	2.796	2.14	-0.423	-0.481	2.617	1.734	-0.791	0.885	2.199	-0.54	-0.5	-0.404	-0.565	-0.623	0.448	0.479	-0.495	-0.577	1.07	2.924	-0.598	-0.691	1.062	1.271	-0.66	1.566
glutamate 5-kinase activity	-0.055	-0.172	2.916	4.508	-0.262	-0.045	-0.231	-0.18	-0.226	-0.228	-0.386	-0.16	-0.181	-0.239	-0.175	3.198	-0.252	-0.269	-0.204	-0.189	-0.153	-0.213	-0.235	-0.312	1.836	-0.187	-0.218	-0.231	2.998	-0.226	-0.261	-0.232	-0.211	3.887	-0.187
glutamate biosynthesis	-0.135	-0.422	0.528	-0.531	-0.643	-0.11	-0.566	1.753	1.208	-0.583	-0.985	-0.408	-0.463	-0.611	-0.446	-0.763	4.188	5.356	-0.52	1.635	-0.389	1.34	1.116	-0.795	2.411	1.663	-0.556	2.902	-0.809	-0.576	2.446	1.147	1.36	-0.636	1.662
glutamate catabolism	-0.055	-0.172	-0.325	-0.217	-0.262	-0.045	-0.231	-0.18	-0.226	-0.228	-0.386	-0.16	-0.181	-0.239	-0.175	-0.299	-0.252	-0.269	-0.204	-0.189	-0.153	-0.213	-0.235	-0.312	1.836	-0.187	-0.218	-0.231	6.313	-0.226	-0.261	-0.232	-0.211	8.023	-0.187
glutamate decarboxylase activity	-0.039	-0.122	-0.23	-0.153	-0.185	-0.032	-0.163	-0.127	-0.16	-0.161	-0.273	-0.113	-0.128	-0.169	-0.124	-0.211	-0.178	-0.19	-0.144	-0.134	-0.108	-0.151	-0.166	-0.22	-0.34	-0.132	-0.154	-0.163	4.463	-0.16	-0.185	-0.164	-0.149	5.673	-0.132
glutamate dehydrogenase (NADP+) activity	-0.055	-0.172	-0.325	-0.217	-0.262	-0.045	-0.231	-0.18	-0.226	-0.228	-0.386	-0.16	-0.181	-0.239	-0.175	-0.299	-0.252	-0.269	-0.204	-0.189	-0.153	-0.213	-0.235	-0.312	1.836	-0.187	-0.218	-0.231	-0.317	-0.226	-0.261	-0.232	-0.211	-0.249	-0.187
glutamate dehydrogenase activity	-0.055	-0.172	-0.325	-0.217	-0.262	-0.045	-0.231	-0.18	-0.226	-0.228	-0.386	-0.16	-0.181	-0.239	-0.175	-0.299	3.849	3.578	-0.204	-0.189	-0.153	-0.213	-0.235	-0.312	1.836	-0.187	-0.218	-0.231	-0.317	-0.226	-0.261	-0.232	-0.211	-0.249	-0.187
glutamate metabolism	-0.151	-0.472	1.479	-0.594	-0.72	-0.123	-0.633	1.485	0.969	-0.647	-1.093	-0.453	-0.514	-0.678	-0.495	-0.846	3.643	4.686	-0.577	1.374	-0.432	1.095	0.881	-0.883	2.739	1.4	-0.617	2.493	1.45	-0.639	2.067	0.911	1.114	2.223	1.399
glutamate N-acetyltransferase activity	-0.039	-0.122	-0.23	-0.153	-0.185	-0.032	-0.163	-0.127	-0.16	-0.161	-0.273	-0.113	-0.128	-0.169	-0.124	-0.211	-0.178	-0.19	6.94	-0.134	-0.108	-0.151	-0.166	-0.22	-0.34	-0.132	-0.154	-0.163	-0.224	-0.16	-0.185	-0.164	-0.149	-0.176	-0.132
glutamate synthase (NADPH) activity	-0.039	-0.122	-0.23	-0.153	-0.185	-0.032	-0.163	7.843	6.266	-0.161	-0.273	-0.113	-0.128	-0.169	-0.124	-0.211	5.621	5.251	-0.144	7.49	-0.108	-0.151	-0.166	-0.22	-0.34	-0.132	-0.154	-0.163	-0.224	-0.16	-0.185	-0.164	-0.149	-0.176	-0.132
glutamate synthase activity	-0.039	-0.122	-0.23	-0.153	-0.185	-0.032	-0.163	7.843	6.266	-0.161	-0.273	-0.113	-0.128	-0.169	-0.124	-0.211	5.621	5.251	-0.144	7.49	-0.108	-0.151	-0.166	-0.22	-0.34	-0.132	-0.154	-0.163	-0.224	-0.16	-0.185	-0.164	-0.149	-0.176	-0.132
glutamate synthase activity\, NADH or NADPH as acceptor	-0.039	-0.122	-0.23	-0.153	-0.185	-0.032	-0.163	7.843	6.266	-0.161	-0.273	-0.113	-0.128	-0.169	-0.124	-0.211	5.621	5.251	-0.144	7.49	-0.108	-0.151	-0.166	-0.22	-0.34	-0.132	-0.154	-0.163	-0.224	-0.16	-0.185	-0.164	-0.149	-0.176	-0.132
glutamate synthase complex	-0.039	-0.122	-0.23	-0.153	-0.185	-0.032	-0.163	7.843	6.266	-0.161	-0.273	-0.113	-0.128	-0.169	-0.124	-0.211	5.621	5.251	-0.144	7.49	-0.108	-0.151	-0.166	-0.22	-0.34	-0.132	-0.154	-0.163	-0.224	-0.16	-0.185	-0.164	-0.149	-0.176	-0.132
glutamate-5-semialdehyde dehydrogenase activity	-0.039	-0.122	-0.23	-0.153	-0.185	-0.032	6.126	-0.127	-0.16	-0.161	-0.273	-0.113	-0.128	-0.169	-0.124	-0.211	-0.178	-0.19	-0.144	-0.134	-0.108	-0.151	-0.166	-0.22	-0.34	-0.132	-0.154	-0.163	-0.224	-0.16	-0.185	-0.164	-0.149	-0.176	-0.132
glutamate-ammonia ligase activity								-0.127	6.266	-0.161	-0.273	-0.113	-0.128	-0.169	-0.124	-0.211	-0.178	-0.19	-0.144	7.49	9.273	-0.151	-0.166	-0.22	-0.34	-0.132	-0.154	-0.163	-0.224	-0.16	-0.185	-0.164	-0.149	-0.176	-0.132
glutamate-cysteine ligase activity	-0.039	-0.122	4.353	-0.153	-0.185	-0.032	-0.163	-0.127	-0.16	-0.161	-0.273	-0.113	-0.128	-0.169	-0.124	-0.211	-0.178	-0.19	-0.144	-0.134	-0.108	-0.151	-0.166	4.539	2.937	-0.132	-0.154	6.123	4.463	-0.16	-0.185	-0.164	-0.149	-0.176	-0.132
glutamate-tRNA ligase activity	-0.039	-0.122	-0.23	-0.153	-0.185	-0.032	-0.163	-0.221	-0.276	-0.28	1.802	-0.196	-0.222	-0.293	-0.214	-0.366	-0.308	-0.33	-0.25	-0.231	-0.187	-0.261	-0.288	-0.382	-0.59	-0.229	-0.267	-0.283	-0.388	-0.277	-0.32	-0.284	-0.259	-0.305	-0.229
glutamine biosynthesis								-0.127	6.266	-0.161	-0.273	-0.113	-0.128	-0.169	-0.124	-0.211	-0.178	-0.19	-0.144	7.49	9.273	-0.151	-0.166	-0.22	-0.34	-0.132	-0.154	-0.163	-0.224	-0.16	-0.185	-0.164	-0.149	-0.176	-0.132
glutamine family amino acid biosynthesis	-0.183	-0.573	-0.101	-0.72	-0.872	-0.149	-0.768	0.959	1.776	0.465	-1.367	-0.567	0.945	-0.848	-0.62	0.924	2.596	3.408	2.118	3.915	3.22	0.605	0.405	-1.104	3.55	0.883	-0.772	5.482	-1.123	-0.8	1.322	0.434	0.622	-0.883	0.882
glutamine family amino acid catabolism	-0.11	-0.345	-0.65	-0.434	-0.525	-0.09	-0.462	-0.361	-0.452	-0.457	-0.772	-0.32	-0.363	-0.479	-0.35	-0.598	-0.504	-0.539	-0.408	-0.378	-0.305	1.974	-0.471	-0.624	1.356	2.352	-0.436	1.762	4.341	-0.452	-0.522	-0.464	-0.423	5.709	2.351
glutamine family amino acid metabolism	-0.274	-0.858	0.358	0.842	-1.306	-0.224	-0.246	0.13	0.552	-0.342	-2.033	-0.843	0.117	-0.439	0.191	0.436	1.032	1.53	0.846	2.104	1.739	1.636	0.435	-1.642	3.237	2.149	-0.247	4.747	2.142	-1.19	0.903	-0.373	-0.187	3.442	1.103
glutamine metabolism	-0.135	-0.422	-0.797	1.4	-0.643	-0.11	-0.566	-0.494	1.042	-0.626	-1.058	-0.438	-0.498	-0.657	-0.48	-0.819	-0.69	-0.739	-0.559	1.453	2.007	1.17	0.953	-0.854	0.374	-0.512	1.122	-0.633	-0.869	-0.619	0.733	-0.636	-0.58	-0.684	-0.512
glutamine-fructose-6-phosphate transaminase (isomerizing) activity								-0.127	-0.16	-0.161	-0.273	-0.113	-0.128	-0.169	-0.124	-0.211	-0.178	-0.19	-0.144	-0.134	-0.108	-0.151	-0.166	-0.22	-0.34	-0.132	-0.154	-0.163	-0.224	-0.16	-0.185	-0.164	-0.149	-0.176	-0.132
glutamine-tRNA ligase activity								-0.127	-0.16	-0.161	3.666	-0.113	-0.128	-0.169	-0.124	-0.211	-0.178	-0.19	-0.144	-0.134	-0.108	-0.151	-0.166	-0.22	-0.34	-0.132	-0.154	-0.163	-0.224	-0.16	-0.185	-0.164	-0.149	-0.176	-0.132
glutaminyl-tRNA aminoacylation								-0.127	-0.16	-0.161	3.666	-0.113	-0.128	-0.169	-0.124	-0.211	-0.178	-0.19	-0.144	-0.134	-0.108	-0.151	-0.166	-0.22	-0.34	-0.132	-0.154	-0.163	-0.224	-0.16	-0.185	-0.164	-0.149	-0.176	-0.132
glutamyl-tRNA aminoacylation	-0.039	-0.122	-0.23	-0.153	-0.185	-0.032	-0.163	-0.221	-0.276	-0.28	1.802	-0.196	-0.222	-0.293	-0.214	-0.366	-0.308	-0.33	-0.25	-0.231	-0.187	-0.261	-0.288	-0.382	-0.59	-0.229	-0.267	-0.283	-0.388	-0.277	-0.32	-0.284	-0.259	-0.305	-0.229
glutamyl-tRNA(Gln) amidotransferase activity	-0.055	-0.172	-0.325	-0.217	-0.262	-0.045	-0.231	-0.18	-0.226	-0.228	-0.386	-0.16	-0.181	-0.239	-0.175	-0.299	-0.252	-0.269	-0.204	-0.189	-0.153	-0.213	-0.235	-0.312	-0.482	-0.187	-0.218	-0.231	-0.317	-0.226	-0.261	-0.232	-0.211	-0.249	-0.187
glutathione biosynthesis	-0.055	-0.172	6.157	-0.217	-0.262	-0.045	-0.231	-0.18	-0.226	-0.228	-0.386	-0.16	-0.181	-0.239	-0.175	-0.299	-0.252	-0.269	-0.204	-0.189	-0.153	-0.213	-0.235	3.054	1.836	-0.187	-0.218	4.215	2.998	-0.226	-0.261	-0.232	-0.211	-0.249	-0.187
glutathione catabolism	-0.039	-0.122	-0.23	-0.153	-0.185	-0.032	-0.163	-0.127	-0.16	-0.161	-0.273	-0.113	-0.128	-0.169	-0.124	-0.211	-0.178	-0.19	-0.144	-0.134	-0.108	-0.151	-0.166	4.539	2.937	-0.132	-0.154	-0.163	-0.224	-0.16	-0.185	-0.164	-0.149	-0.176	-0.132
glutathione disulfide oxidoreductase activity	-0.039	-0.122	-0.23	-0.153	-0.185	-0.032	-0.163	-0.127	-0.16	-0.161	-0.273	-0.113	-0.128	-0.169	-0.124	-0.211	-0.178	-0.19	-0.144	-0.134	-0.108	-0.151	-0.166	4.539	2.937	-0.132	-0.154	-0.163	-0.224	-0.16	-0.185	-0.164	-0.149	-0.176	-0.132
glutathione metabolism	-0.117	-0.366	2.368	-0.46	-0.557	-0.095	1.609	-0.383	-0.479	-0.485	-0.819	-0.339	-0.385	-0.508	-0.371	-0.634	-0.534	-0.572	-0.433	-0.401	-0.324	-0.452	-0.499	5.689	4.445	-0.396	-0.462	3.704	2.455	-0.479	-0.554	-0.492	-0.449	-0.529	-0.397
glutathione peroxidase activity	-0.087	-0.272	-0.514	-0.343	-0.415	-0.071	-0.365	-0.285	-0.357	-0.361	-0.61	-0.253	-0.287	2.339	3.397	-0.473	2.196	-0.426	-0.322	-0.299	-0.241	-0.337	-0.372	-0.493	-0.762	-0.295	2.63	2.447	1.596	-0.357	-0.413	-0.367	2.726	2.222	3.15
glutathione S-conjugate-exporting ATPase activity	-0.039	8.213	4.353	-0.153	-0.185	-0.032	-0.163	-0.127	-0.16	-0.161	-0.273	-0.113	-0.128	-0.169	-0.124	-0.211	-0.178	-0.19	-0.144	-0.134	-0.108	-0.151	-0.166	4.539	2.937	-0.132	-0.154	-0.163	-0.224	-0.16	-0.185	-0.164	-0.149	-0.176	-0.132
glutathione synthase activity	-0.039	-0.122	4.353	-0.153	-0.185	-0.032	-0.163	-0.127	-0.16	-0.161	-0.273	-0.113	-0.128	-0.169	-0.124	-0.211	-0.178	-0.19	-0.144	-0.134	-0.108	-0.151	-0.166	-0.22	-0.34	-0.132	-0.154	-0.163	-0.224	-0.16	-0.185	-0.164	-0.149	-0.176	-0.132
glutathione transferase activity	-0.078	-0.244	-0.46	-0.306	-0.371	-0.064	-0.327	-0.255	-0.319	-0.323	-0.546	-0.226	-0.257	-0.339	-0.247	-0.423	-0.356	-0.381	-0.288	-0.267	-0.216	-0.301	-0.333	1.94	2.597	-0.264	-0.308	2.817	4.24	-0.319	-0.369	-0.328	3.122	2.573	-0.264
glutathione-disulfide reductase activity	-0.039	-0.122	-0.23	-0.153	-0.185	-0.032	-0.163	-0.127	-0.16	-0.161	-0.273	-0.113	-0.128	-0.169	-0.124	-0.211	-0.178	-0.19	-0.144	-0.134	-0.108	-0.151	-0.166	4.539	2.937	-0.132	-0.154	-0.163	-0.224	-0.16	-0.185	-0.164	-0.149	-0.176	-0.132
glyceraldehyde-3-phosphate dehydrogenase (phosphorylating) activity	-0.067	-0.211	-0.398	-0.265	-0.321	-0.055	-0.283	-0.221	-0.276	-0.28	-0.473	-0.196	-0.222	-0.293	-0.214	-0.366	6.389	5.954	-0.25	-0.231	-0.187	-0.261	-0.288	-0.382	1.303	-0.229	-0.267	-0.283	-0.388	-0.277	-0.32	-0.284	3.691	-0.305	-0.229
glyceraldehyde-3-phosphate dehydrogenase activity	-0.067	-0.211	-0.398	-0.265	-0.321	-0.055	-0.283	-0.221	-0.276	-0.28	-0.473	-0.196	-0.222	-0.293	-0.214	-0.366	6.389	5.954	-0.25	-0.231	-0.187	-0.261	-0.288	-0.382	1.303	-0.229	-0.267	-0.283	-0.388	-0.277	-0.32	-0.284	3.691	-0.305	-0.229
glycerol biosynthesis	-0.055	-0.172	2.916	-0.217	-0.262	-0.045	-0.231	-0.18	-0.226	-0.228	-0.386	-0.16	-0.181	-0.239	-0.175	-0.299	-0.252	-0.269	-0.204	-0.189	-0.153	-0.213	-0.235	-0.312	1.836	-0.187	-0.218	-0.231	2.998	-0.226	-0.261	4.197	4.626	3.887	-0.187
glycerol catabolism	-0.039	-0.122	-0.23	-0.153	5.392	-0.032	-0.163	-0.127	-0.16	-0.161	-0.273	-0.113	-0.128	-0.169	-0.124	-0.211	-0.178	-0.19	-0.144	-0.134	-0.108	-0.151	-0.166	-0.22	-0.34	-0.132	-0.154	-0.163	-0.224	-0.16	-0.185	-0.164	-0.149	-0.176	-0.132
glycerol ether biosynthesis	-0.055	-0.172	-0.325	-0.217	-0.262	-0.045	-0.231	-0.18	-0.226	-0.228	-0.386	-0.16	-0.181	-0.239	-0.175	-0.299	-0.252	-0.269	-0.204	-0.189	-0.153	-0.213	-0.235	-0.312	-0.482	-0.187	-0.218	-0.231	-0.317	-0.226	-0.261	-0.232	-0.211	-0.249	-0.187
glycerol ether metabolism	-0.055	-0.172	-0.325	-0.217	-0.262	-0.045	-0.231	-0.18	-0.226	-0.228	-0.386	-0.16	-0.181	-0.239	-0.175	-0.299	-0.252	-0.269	-0.204	-0.189	-0.153	-0.213	-0.235	-0.312	-0.482	-0.187	-0.218	-0.231	-0.317	-0.226	-0.261	-0.232	-0.211	-0.249	-0.187
glycerol kinase activity	-0.039	-0.122	-0.23	-0.153	-0.185	-0.032	-0.163	-0.127	-0.16	-0.161	-0.273	-0.113	-0.128	-0.169	-0.124	-0.211	-0.178	-0.19	-0.144	-0.134	-0.108	-0.151	-0.166	-0.22	-0.34	-0.132	-0.154	-0.163	-0.224	-0.16	-0.185	-0.164	-0.149	-0.176	-0.132
glycerol metabolism	-0.141	-0.44	1.716	-0.553	0.88	-0.115	-0.589	-0.46	-0.576	-0.583	-0.985	-0.408	1.736	-0.611	-0.446	-0.763	-0.642	-0.687	-0.52	-0.482	-0.389	-0.544	-0.6	-0.795	0.591	-0.477	-0.556	-0.59	0.493	-0.576	-0.666	1.147	1.36	0.988	-0.477
glycerol transport	-0.055	-0.172	2.916	-0.217	3.682	-0.045	-0.231	-0.18	-0.226	-0.228	-0.386	-0.16	-0.181	-0.239	-0.175	-0.299	-0.252	-0.269	-0.204	-0.189	-0.153	-0.213	-0.235	-0.312	-0.482	-0.187	-0.218	-0.231	-0.317	-0.226	-0.261	-0.232	-0.211	-0.249	-0.187
glycerol transporter activity	-0.055	-0.172	2.916	-0.217	3.682	-0.045	-0.231	-0.18	-0.226	-0.228	-0.386	-0.16	-0.181	-0.239	-0.175	-0.299	-0.252	-0.269	-0.204	-0.189	-0.153	-0.213	-0.235	-0.312	-0.482	-0.187	-0.218	-0.231	-0.317	-0.226	-0.261	-0.232	-0.211	-0.249	-0.187
glycerol-1-phosphatase activity	-0.055	-0.172	2.916	-0.217	-0.262	-0.045	-0.231	-0.18	-0.226	-0.228	-0.386	-0.16	-0.181	-0.239	-0.175	-0.299	-0.252	-0.269	-0.204	-0.189	-0.153	-0.213	-0.235	-0.312	1.836	-0.187	-0.218	-0.231	2.998	-0.226	-0.261	4.197	4.626	3.887	-0.187
glycerol-3-phosphate dehydrogenase (NAD+) activity	-0.055	-0.172	-0.325	-0.217	-0.262	-0.045	-0.231	-0.18	-0.226	-0.228	-0.386	-0.16	-0.181	-0.239	-0.175	-0.299	-0.252	-0.269	-0.204	-0.189	-0.153	-0.213	-0.235	-0.312	-0.482	-0.187	-0.218	-0.231	-0.317	-0.226	-0.261	-0.232	-0.211	-0.249	-0.187
glycerol-3-phosphate dehydrogenase activity	-0.039	-0.122	-0.23	-0.153	-0.185	-0.032	-0.163	-0.127	-0.16	-0.161	-0.273	-0.113	-0.128	-0.169	-0.124	-0.211	-0.178	-0.19	-0.144	-0.134	-0.108	-0.151	-0.166	-0.22	2.937	-0.132	-0.154	-0.163	-0.224	-0.16	-0.185	-0.164	-0.149	-0.176	-0.132
glycerol-3-phosphate dehydrogenase complex	-0.067	-0.211	-0.398	-0.265	-0.321	-0.055	-0.283	-0.221	-0.276	-0.28	-0.473	-0.196	-0.222	-0.293	-0.214	-0.366	-0.308	-0.33	-0.25	-0.231	-0.187	-0.261	-0.288	-0.382	1.303	-0.229	-0.267	-0.283	-0.388	-0.277	-0.32	-0.284	-0.259	-0.305	-0.229
glycerol-3-phosphate metabolism	-0.078	-0.244	-0.46	-0.306	-0.371	-0.064	-0.327	-0.255	-0.319	-0.323	-0.546	-0.226	-0.257	-0.339	-0.247	-0.423	-0.356	-0.381	-0.288	-0.267	-0.216	-0.301	-0.333	-0.441	0.958	-0.264	-0.308	-0.327	-0.448	-0.319	-0.369	-0.328	-0.299	-0.353	-0.264
glycerol-3-phosphate O-acyltransferase activity	-0.055	-0.172	-0.325	-0.217	-0.262	-0.045	-0.231	-0.18	-0.226	-0.228	-0.386	-0.16	-0.181	-0.239	-0.175	-0.299	-0.252	-0.269	-0.204	-0.189	-0.153	-0.213	-0.235	-0.312	-0.482	-0.187	-0.218	-0.231	-0.317	-0.226	-0.261	-0.232	-0.211	-0.249	-0.187
glycerolipid biosynthesis	-0.055	-0.172	-0.325	-0.217	-0.262	-0.045	-0.231	-0.18	-0.226	-0.228	-0.386	-0.16	-0.181	-0.239	-0.175	-0.299	-0.252	-0.269	-0.204	-0.189	-0.153	-0.213	-0.235	-0.312	-0.482	-0.187	-0.218	-0.231	-0.317	-0.226	-0.261	-0.232	-0.211	-0.249	-0.187
glycerolipid metabolism	-0.055	-0.172	-0.325	-0.217	-0.262	-0.045	-0.231	-0.18	-0.226	-0.228	-0.386	-0.16	-0.181	-0.239	-0.175	-0.299	-0.252	-0.269	-0.204	-0.189	-0.153	-0.213	-0.235	-0.312	-0.482	-0.187	-0.218	-0.231	-0.317	-0.226	-0.261	-0.232	-0.211	-0.249	-0.187
glycerone kinase activity	-0.055	-0.172	-0.325	-0.217	-0.262	-0.045	-0.231	-0.18	-0.226	-0.228	-0.386	-0.16	-0.181	-0.239	-0.175	-0.299	-0.252	-0.269	-0.204	-0.189	-0.153	-0.213	-0.235	-0.312	-0.482	-0.187	-0.218	-0.231	-0.317	-0.226	-0.261	-0.232	-0.211	-0.249	-0.187
glycerone-phosphate O-acyltransferase activity	-0.055	-0.172	-0.325	-0.217	-0.262	-0.045	-0.231	-0.18	-0.226	-0.228	-0.386	-0.16	-0.181	-0.239	-0.175	-0.299	-0.252	-0.269	-0.204	-0.189	-0.153	-0.213	-0.235	-0.312	-0.482	-0.187	-0.218	-0.231	-0.317	-0.226	-0.261	-0.232	-0.211	-0.249	-0.187
glycerophosphodiester phosphodiesterase activity	-0.055	-0.172	-0.325	-0.217	-0.262	-0.045	-0.231	-0.18	-0.226	-0.228	-0.386	-0.16	5.42	-0.239	-0.175	-0.299	-0.252	-0.269	-0.204	-0.189	-0.153	-0.213	-0.235	-0.312	-0.482	-0.187	-0.218	-0.231	-0.317	-0.226	-0.261	-0.232	-0.211	-0.249	-0.187
glycerophosphodiester transport	-0.039	-0.122	-0.23	-0.153	-0.185	-0.032	-0.163	-0.127	-0.16	-0.161	-0.273	-0.113	-0.128	-0.169	-0.124	-0.211	-0.178	5.251	-0.144	-0.134	-0.108	-0.151	-0.166	-0.22	-0.34	-0.132	-0.154	-0.163	4.463	-0.16	-0.185	-0.164	-0.149	5.673	-0.132
glycerophosphodiester transporter activity	-0.039	-0.122	-0.23	-0.153	-0.185	-0.032	-0.163	-0.127	-0.16	-0.161	-0.273	-0.113	-0.128	-0.169	-0.124	-0.211	-0.178	5.251	-0.144	-0.134	-0.108	-0.151	-0.166	-0.22	-0.34	-0.132	-0.154	-0.163	4.463	-0.16	-0.185	-0.164	-0.149	5.673	-0.132
glycerophospholipid biosynthesis	-0.087	-0.272	-0.514	-0.343	2.081	-0.071	-0.365	-0.626	-0.784	1.807	1.078	-0.555	-0.63	-0.831	1.073	-0.026	-0.873	0.178	0.742	0.904	-0.529	-0.74	-0.816	-1.082	-1.672	-0.648	-0.756	-0.802	-1.1	-0.784	-0.906	-0.805	-0.734	-0.865	-0.649
glycerophospholipid catabolism	-0.039	-0.122	-0.23	-0.153	-0.185	-0.032	-0.163	-0.127	-0.16	-0.161	-0.273	-0.113	-0.128	-0.169	-0.124	-0.211	-0.178	-0.19	-0.144	-0.134	-0.108	-0.151	-0.166	-0.22	2.937	-0.132	-0.154	6.123	4.463	-0.16	-0.185	6.099	6.691	5.673	7.57
glycerophospholipid metabolism	-0.129	-0.404	-0.763	-0.509	2.752	-0.105	-0.542	-0.7	-0.877	1.44	1.386	-0.621	-0.705	-0.93	0.824	-0.255	-0.977	-0.05	0.506	0.662	-0.592	-0.828	-0.913	-1.21	-1.27	-0.725	-0.846	0.254	0.486	-0.877	-1.014	1.393	1.684	0.103	0.685
glycine biosynthesis	-0.055	-0.172	2.916	4.508	-0.262	-0.045	-0.231	-0.221	-0.276	-0.28	-0.473	-0.196	-0.222	-0.293	-0.214	-0.366	-0.308	-0.33	-0.25	-0.231	-0.187	-0.261	-0.288	5.115	1.303	-0.229	-0.267	-0.283	2.319	-0.277	-0.32	-0.284	-0.259	-0.305	-0.229
glycine catabolism	-0.067	-0.211	-0.398	-0.265	-0.321	-0.055	-0.283	-0.221	-0.276	-0.28	4.077	4.978	-0.222	-0.293	-0.214	-0.366	-0.308	-0.33	-0.25	-0.231	5.23	-0.261	-0.288	-0.382	-0.59	-0.229	-0.267	-0.283	-0.388	-0.277	-0.32	-0.284	-0.259	3.072	-0.229
glycine cleavage complex	-0.078	-0.244	-0.46	-0.306	-0.371	-0.064	-0.327	-0.255	-0.319	-0.323	5.364	8.736	-0.257	-0.339	-0.247	-0.423	-0.356	-0.381	-0.288	-0.267	9.167	-0.301	-0.333	-0.441	-0.681	-0.264	-0.308	-0.327	-0.448	-0.319	-0.369	-0.328	-0.299	5.498	-0.264
glycine dehydrogenase (decarboxylating) activity	-0.078	-0.244	-0.46	-0.306	-0.371	-0.064	-0.327	-0.255	-0.319	-0.323	5.364	8.736	-0.257	-0.339	-0.247	-0.423	-0.356	-0.381	-0.288	-0.267	9.167	-0.301	-0.333	-0.441	-0.681	-0.264	-0.308	-0.327	-0.448	-0.319	-0.369	-0.328	-0.299	5.498	-0.264
glycine dehydrogenase complex (decarboxylating)	-0.039	-0.122	-0.23	-0.153	-0.185	-0.032	-0.163	-0.127	-0.16	-0.161	3.666	8.846	-0.128	-0.169	-0.124	-0.211	-0.178	-0.19	-0.144	-0.134	9.273	-0.151	-0.166	-0.22	-0.34	-0.132	-0.154	-0.163	-0.224	-0.16	-0.185	-0.164	-0.149	5.673	-0.132
glycine hydroxymethyltransferase activity	-0.103	-0.322	-0.608	-0.406	-0.491	-0.084	1.947	-0.338	-0.423	-0.427	2.257	3.089	-0.34	-0.448	-0.327	-0.559	-0.471	-0.504	-0.381	5.412	6.81	-0.399	-0.44	-0.583	-0.901	-0.35	-0.408	-0.432	-0.593	-0.423	-0.489	-0.434	-0.396	-0.467	-0.35
glycine metabolism	-0.11	-0.345	0.971	1.931	-0.525	-0.09	1.764	-0.383	-0.479	-0.485	4.437	8.627	-0.385	-0.508	-0.371	-0.634	-0.534	-0.572	-0.433	2.142	9.064	-0.452	-0.499	2.514	0.071	-0.396	-0.462	-0.49	0.891	-0.479	-0.554	-0.492	-0.449	3.373	-0.397
glycine-tRNA ligase activity								-0.18	-0.226	-0.228	-0.386	-0.16	-0.181	-0.239	-0.175	-0.299	-0.252	-0.269	-0.204	-0.189	-0.153	-0.213	-0.235	-0.312	-0.482	-0.187	-0.218	-0.231	-0.317	-0.226	-0.261	-0.232	-0.211	-0.249	-0.187
glycogen (starch) synthase activity	-0.055	-0.172	-0.325	-0.217	-0.262	-0.045	-0.231	-0.18	-0.226	4.266	2.4	-0.16	-0.181	8.354	5.631	-0.299	-0.252	3.578	-0.204	-0.189	-0.153	-0.213	-0.235	-0.312	-0.482	-0.187	-0.218	-0.231	-0.317	-0.226	-0.261	-0.232	-0.211	-0.249	-0.187
glycogen biosynthesis	-0.135	-0.422	-0.797	-0.531	-0.643	-0.11	-0.566	3.966	1.208	10.005	2.296	2.08	-0.463	9.511	6.393	-0.763	4.188	6.867	3.414	-0.482	-0.389	-0.544	-0.6	-0.795	-0.319	-0.477	-0.556	-0.59	0.493	-0.576	-0.666	-0.592	-0.539	0.988	-0.477
glycogen catabolism	-0.087	-0.272	-0.514	-0.343	-0.415	-0.071	-0.365	2.943	2.233	7.392	0.94	3.382	-0.314	4.548	3.051	-0.518	1.933	1.756	2.54	-0.327	3.567	-0.369	-0.408	-0.54	0.504	-0.324	-0.377	-0.4	1.365	-0.391	-0.452	-0.402	-0.366	1.957	-0.324
glycogen debranching enzyme activity	-0.039	-0.122	-0.23	-0.153	-0.185	-0.032	-0.163	-0.127	-0.16	-0.161	-0.273	-0.113	-0.128	5.906	-0.124	-0.211	-0.178	-0.19	-0.144	-0.134	-0.108	-0.151	-0.166	-0.22	2.937	-0.132	-0.154	-0.163	4.463	-0.16	-0.185	-0.164	-0.149	5.673	-0.132
glycogen metabolism	-0.179	3.087	-1.055	0.758	1.588	-0.146	0.626	5.752	3.064	8.108	1.002	3.025	-0.643	8.895	5.964	-1.059	4.92	6.68	2.118	-0.669	1.34	0.605	0.405	-1.104	-1.049	-0.662	-0.772	-0.818	-0.183	-0.8	-0.925	-0.822	0.622	1.462	-0.662
glycogen phosphorylase activity	-0.039	-0.122	-0.23	-0.153	-0.185	-0.032	-0.163	7.843	6.266	6.194	-0.273	8.846	-0.128	5.906	8.087	-0.211	5.621	5.251	-0.144	-0.134	9.273	-0.151	-0.166	-0.22	-0.34	-0.132	-0.154	-0.163	-0.224	-0.16	-0.185	-0.164	-0.149	-0.176	-0.132
glycogen synthase kinase 3 activity	-0.055	-0.172	-0.325	-0.217	-0.262	-0.045	-0.231	-0.18	4.318	-0.228	-0.386	-0.16	-0.181	-0.239	-0.175	-0.299	-0.252	3.578	-0.204	-0.189	-0.153	-0.213	-0.235	-0.312	-0.482	-0.187	-0.218	-0.231	-0.317	-0.226	-0.261	-0.232	-0.211	-0.249	-0.187
glycogenin glucosyltransferase activity	-0.055	-0.172	-0.325	-0.217	-0.262	-0.045	-0.231	5.456	4.318	4.266	2.4	-0.16	-0.181	-0.239	-0.175	-0.299	3.849	3.578	-0.204	-0.189	-0.153	-0.213	-0.235	-0.312	-0.482	-0.187	-0.218	-0.231	-0.317	-0.226	-0.261	-0.232	-0.211	-0.249	-0.187
glycolipid 2-alpha-mannosyltransferase activity	-0.11	-0.345	-0.65	-0.434	-0.525	-0.09	-0.462	-0.383	-0.479	-0.485	-0.819	-0.339	-0.385	-0.508	-0.371	-0.634	-0.534	-0.572	-0.433	-0.401	-0.324	-0.452	-0.499	0.926	0.071	-0.396	-0.462	-0.49	-0.673	-0.479	-0.554	-0.492	-0.449	-0.529	-0.397
glycolipid mannosyltransferase activity	-0.11	-0.345	-0.65	-0.434	-0.525	-0.09	-0.462	-0.404	-0.505	-0.511	-0.863	-0.358	-0.406	-0.536	-0.391	-0.669	-0.563	-0.603	-0.456	-0.423	-0.341	-0.477	-0.526	0.809	-0.04	-0.418	-0.487	-0.517	-0.709	-0.505	-0.584	-0.519	-0.473	-0.558	-0.418
glycolysis	-0.187	1.157	-0.147	2.057	-0.892	-0.153	0.53	3.368	2.383	1.242	-0.918	4.042	-0.728	3.191	3.514	-1.236	3.947	4.502	1.695	-0.757	2.911	-0.881	-0.973	0.349	1.956	5.966	3.674	1.208	8.366	2.382	1.813	2.401	4.004	4.185	-0.713
glycolytic fermentation	-0.067	-0.211	-0.398	-0.265	-0.321	-0.055	-0.283	-0.255	-0.319	2.856	-0.546	-0.226	-0.257	-0.339	-0.247	-0.423	-0.356	-0.381	-0.288	-0.267	-0.216	-0.301	-0.333	-0.441	0.958	-0.264	3.017	-0.327	1.896	-0.319	2.433	-0.328	-0.299	2.573	-0.264
glycoprotein biosynthesis	-0.277	0.32	2.931	0.812	4.236	8.745	2.419	-1.081	-1.354	-1.369	0.039	-0.959	-1.088	-0.71	-1.049	-1.792	-1.509	-1.615	-1.222	-1.133	-0.915	-1.278	-0.672	-0.732	-1.713	-1.12	-1.306	-1.385	-0.78	-0.586	-1.565	-1.391	-1.268	-1.495	-1.12
glycoprotein catabolism	-0.039	-0.122	-0.23	-0.153	-0.185	-0.032	-0.163	-0.127	-0.16	-0.161	-0.273	-0.113	-0.128	-0.169	-0.124	-0.211	-0.178	-0.19	-0.144	-0.134	-0.108	-0.151	-0.166	-0.22	-0.34	-0.132	-0.154	-0.163	-0.224	-0.16	-0.185	-0.164	-0.149	-0.176	-0.132
glycoprotein metabolism	-0.28	0.299	2.87	0.782	4.169	8.655	2.372	-1.089	-1.363	-1.379	0.007	-0.966	-1.096	-0.725	-1.056	-1.805	-1.52	-1.627	-1.231	-1.141	-0.921	-1.287	-0.687	-0.753	-1.742	-1.128	-1.315	-1.395	-0.802	-0.601	-1.576	-1.401	-1.277	-1.506	-1.128
glycosylphosphatidylinositol-N-acetylglucosaminyltransferase (GPI-GnT) complex								-0.127	-0.16	-0.161	-0.273	-0.113	-0.128	-0.169	-0.124	-0.211	-0.178	-0.19	-0.144	-0.134	-0.108	-0.151	-0.166	-0.22	-0.34	-0.132	-0.154	-0.163	-0.224	-0.16	-0.185	-0.164	-0.149	-0.176	-0.132
glycylpeptide N-tetradecanoyltransferase activity								-0.127	-0.16	-0.161	-0.273	-0.113	-0.128	-0.169	-0.124	-0.211	-0.178	-0.19	-0.144	-0.134	-0.108	-0.151	-0.166	-0.22	-0.34	-0.132	-0.154	-0.163	-0.224	-0.16	-0.185	-0.164	-0.149	-0.176	-0.132
glycyl-tRNA aminoacylation								-0.18	-0.226	-0.228	-0.386	-0.16	-0.181	-0.239	-0.175	-0.299	-0.252	-0.269	-0.204	-0.189	-0.153	-0.213	-0.235	-0.312	-0.482	-0.187	-0.218	-0.231	-0.317	-0.226	-0.261	-0.232	-0.211	-0.249	-0.187
glyoxylate cycle	-0.123	-0.385	-0.727	-0.485	-0.587	-0.101	-0.517	-0.404	1.528	1.5	-0.863	-0.358	-0.406	1.387	-0.391	0.897	3.108	1.119	1.786	1.99	2.628	1.671	1.43	-0.697	2.034	2.021	-0.487	3.462	2.258	-0.505	2.963	1.463	1.692	3.145	2.02
glyoxylate metabolism	-0.123	-0.385	-0.727	-0.485	-0.587	-0.101	-0.517	-0.404	1.528	1.5	-0.863	-0.358	-0.406	1.387	-0.391	0.897	3.108	1.119	1.786	1.99	2.628	1.671	1.43	-0.697	2.034	2.021	-0.487	3.462	2.258	-0.505	2.963	1.463	1.692	3.145	2.02
glyoxysome	-0.055	-0.172	-0.325	-0.217	-0.262	-0.045	-0.231	-0.18	-0.226	-0.228	-0.386	-0.16	-0.181	-0.239	-0.175	-0.299	-0.252	-0.269	-0.204	-0.189	-0.153	-0.213	-0.235	-0.312	1.836	-0.187	-0.218	-0.231	2.998	-0.226	-0.261	-0.232	-0.211	3.887	-0.187
Gly-X carboxypeptidase activity	-0.039	-0.122	-0.23	-0.153	-0.185	-0.032	-0.163	-0.127	-0.16	-0.161	-0.273	-0.113	-0.128	-0.169	-0.124	-0.211	-0.178	-0.19	-0.144	-0.134	-0.108	-0.151	-0.166	-0.22	-0.34	-0.132	-0.154	-0.163	-0.224	-0.16	-0.185	6.099	6.691	-0.176	-0.132
GMP biosynthesis	-0.055	-0.172	-0.325	-0.217	-0.262	-0.045	-0.231	-0.285	-0.357	-0.361	-0.61	-0.253	-0.287	-0.379	-0.277	-0.473	-0.398	-0.426	-0.322	-0.299	-0.241	-0.337	-0.372	-0.493	-0.762	-0.295	-0.344	-0.365	-0.501	-0.357	-0.413	-0.367	-0.334	-0.394	-0.295
GMP metabolism	-0.055	-0.172	-0.325	-0.217	-0.262	-0.045	-0.231	-0.312	-0.391	-0.396	-0.668	-0.277	-0.314	-0.415	-0.303	-0.518	-0.436	-0.467	-0.353	-0.327	-0.264	-0.369	-0.408	-0.54	-0.834	-0.324	-0.377	-0.4	-0.549	-0.391	-0.452	-0.402	-0.366	-0.432	-0.324
GMP synthase (glutamine-hydrolyzing) activity								-0.127	-0.16	-0.161	-0.273	-0.113	-0.128	-0.169	-0.124	-0.211	-0.178	-0.19	-0.144	-0.134	-0.108	-0.151	-0.166	-0.22	-0.34	-0.132	-0.154	-0.163	-0.224	-0.16	-0.185	-0.164	-0.149	-0.176	-0.132
Golgi apparatus	-0.404	1.208	2.147	0.392	5.797	5.904	4.525	-0.946	-0.422	-0.462	0.131	-0.684	-1.61	-0.63	-0.878	-2.651	-0.33	-0.605	-0.646	0.2	-0.584	-1.335	-1.073	-1.594	-3.466	-1.025	-1.387	-1.534	-2.043	-0.949	-1.397	-1.03	-0.753	-1.253	-1.026
Golgi cis cisterna	-0.11	2.605	7.458	4.295	11.317	22.218	3.989	-0.383	-0.479	-0.485	0.495	-0.339	-0.385	-0.508	-0.371	-0.634	-0.534	-0.572	-0.433	-0.401	-0.324	-0.452	-0.499	-0.661	-1.022	-0.396	-0.462	-0.49	-0.673	-0.479	-0.554	-0.492	-0.449	-0.529	-0.397
Golgi cis-face	-0.087	-0.272	1.537	2.647	2.081	14.032	2.449	-0.478	-0.598	-0.605	-1.022	-0.423	-0.481	-0.634	-0.463	-0.791	-0.666	-0.713	-0.54	-0.5	-0.404	-0.565	-0.623	-0.825	-1.275	-0.495	-0.577	-0.612	-0.839	-0.598	-0.691	-0.614	-0.56	-0.66	-0.495
Golgi medial cisterna	-0.039	-0.122	-0.23	-0.153	-0.185	-0.032	-0.163	-0.127	-0.16	-0.161	-0.273	-0.113	-0.128	-0.169	-0.124	-0.211	-0.178	-0.19	-0.144	-0.134	-0.108	-0.151	-0.166	-0.22	-0.34	-0.132	-0.154	-0.163	-0.224	-0.16	-0.185	-0.164	-0.149	-0.176	-0.132
Golgi membrane	-0.161	1.522	0.165	-0.633	3.3	-0.131	2.383	-0.613	1.918	0.552	-0.488	1.329	-0.617	1.725	-0.594	-1.015	1.568	1.359	-0.692	-0.642	1.442	0.694	0.492	-0.064	-0.951	0.975	0.649	0.529	-0.097	0.575	0.284	0.521	0.711	0.375	0.975
Golgi organization and biogenesis	-0.039	-0.122	-0.23	-0.153	5.392	-0.032	-0.163	-0.127	-0.16	-0.161	-0.273	-0.113	-0.128	-0.169	-0.124	-0.211	-0.178	-0.19	-0.144	-0.134	-0.108	-0.151	-0.166	-0.22	-0.34	-0.132	-0.154	-0.163	-0.224	-0.16	-0.185	-0.164	-0.149	-0.176	-0.132
Golgi stack	-0.141	1.875	5.535	3.159	10.175	17.396	4.652	-0.494	-0.619	-0.626	-0.039	-0.438	-0.498	-0.657	-0.48	-0.819	-0.69	-0.739	-0.559	-0.518	-0.418	-0.584	-0.645	-0.854	-1.32	-0.512	-0.597	-0.633	-0.869	-0.619	-0.716	-0.636	-0.58	-0.684	-0.512
Golgi to endosome transport	-0.11	2.605	4.215	6.659	3.422	-0.09	6.215	-0.383	-0.479	-0.485	-0.819	-0.339	-0.385	-0.508	-0.371	-0.634	-0.534	-0.572	-0.433	-0.401	-0.324	1.811	1.562	0.926	0.071	2.174	1.756	1.607	0.891	1.664	1.315	1.597	1.833	1.422	2.173
Golgi to plasma membrane transport	-0.123	4.892	-0.727	-0.485	1.179	-0.101	-0.517	-0.571	-0.715	-0.723	-0.34	-0.506	-0.575	-0.759	-0.554	-0.946	-0.797	-0.853	-0.646	-0.598	-0.483	-0.675	-0.745	-0.987	-0.791	-0.592	-0.69	-0.732	-1.004	-0.715	-0.827	-0.735	-0.67	-0.79	-0.592
Golgi to vacuole transport	-0.156	1.6	1.375	4.407	4.845	-0.127	8.798	-0.542	0.839	-0.686	-0.229	-0.48	-0.545	2.149	-0.525	-0.898	0.613	0.475	-0.612	-0.567	-0.458	-0.64	-0.707	-0.936	-1.447	-0.561	-0.654	-0.694	-0.952	-0.678	-0.784	-0.697	-0.635	-0.749	-0.561
Golgi trans cisterna	-0.055	-0.172	-0.325	-0.217	3.682	-0.045	4.217	-0.221	-0.276	-0.28	-0.473	-0.196	-0.222	-0.293	-0.214	-0.366	-0.308	-0.33	-0.25	-0.231	-0.187	-0.261	-0.288	-0.382	-0.59	-0.229	-0.267	-0.283	-0.388	-0.277	-0.32	-0.284	-0.259	-0.305	-0.229
Golgi trans face	-0.095	-0.298	-0.563	-0.375	1.824	-0.078	2.169	-0.361	-0.452	-0.457	-0.772	-0.32	-0.363	-0.479	-0.35	-0.598	-0.504	-0.539	-0.408	-0.378	-0.305	-0.427	-0.471	1.06	0.196	-0.374	-0.436	-0.462	1.024	1.821	1.46	1.752	1.997	1.57	-0.374
Golgi transport complex	-0.087	-0.272	-0.514	-0.343	-0.415	-0.071	-0.365	-0.361	-0.452	1.791	3.409	-0.32	-0.363	-0.479	-0.35	-0.598	1.548	1.386	2.099	2.319	-0.305	-0.427	-0.471	-0.624	-0.964	-0.374	-0.436	-0.462	-0.634	-0.452	-0.522	-0.464	-0.423	-0.499	-0.374
Golgi vesicle	-0.34	4.764	1.731	3.333	3.58	-0.278	6.638	-0.511	-0.639	-0.647	-0.107	-0.453	-0.514	-0.678	-0.495	-0.846	-0.713	-0.763	-0.577	-0.535	-0.432	-0.604	-0.666	-0.883	-1.364	-0.529	-0.617	-0.654	-0.897	-0.639	-0.739	-0.657	-0.599	-0.706	-0.529
Golgi vesicle transport	-0.141	-0.44	-0.83	-0.553	-0.67	-0.115	1.158	-1.483	-0.724	-0.758	1.34	-0.526	-1.493	-0.363	-1.439	-2.457	-0.536	-0.777	-0.428	-0.21	-0.428	0.041	0.244	-1.724	-3.383	-0.178	-0.619	-0.792	-1.78	-0.158	-0.665	-0.803	-0.533	-1.535	-0.179
GPI anchor biosynthesis	-0.039	-0.122	-0.23	-0.153	-0.185	-0.032	-0.163	-0.542	-0.678	0.814	0.701	-0.48	-0.545	-0.719	1.413	0.27	-0.756	0.475	1.06	1.232	-0.458	-0.64	-0.707	-0.936	-1.447	-0.561	-0.654	-0.694	-0.952	-0.678	-0.784	-0.697	-0.635	-0.749	-0.561
GPI anchor metabolism	-0.055	-0.172	-0.325	-0.217	-0.262	-0.045	-0.231	-0.557	-0.697	0.756	0.619	-0.494	-0.56	-0.739	1.347	0.214	-0.777	0.419	0.999	1.169	-0.471	-0.658	-0.726	-0.962	-1.487	-0.577	-0.672	-0.713	-0.978	-0.697	-0.806	-0.716	-0.653	-0.77	-0.577
GPI-anchor transamidase activity								-0.255	-0.319	-0.323	-0.546	-0.226	-0.257	-0.339	-0.247	-0.423	-0.356	-0.381	-0.288	-0.267	-0.216	-0.301	-0.333	-0.441	-0.681	-0.264	-0.308	-0.327	-0.448	-0.319	-0.369	-0.328	-0.299	-0.353	-0.264
GPI-anchor transamidase complex								-0.18	-0.226	-0.228	-0.386	-0.16	-0.181	-0.239	-0.175	-0.299	-0.252	-0.269	-0.204	-0.189	-0.153	-0.213	-0.235	-0.312	-0.482	-0.187	-0.218	-0.231	-0.317	-0.226	-0.261	-0.232	-0.211	-0.249	-0.187
G-protein coupled receptor activity	-0.039	-0.122	-0.23	-0.153	-0.185	-0.032	-0.163	-0.221	-0.276	-0.28	-0.473	-0.196	-0.222	-0.293	-0.214	-0.366	-0.308	-0.33	-0.25	-0.231	-0.187	-0.261	-0.288	-0.382	-0.59	-0.229	-0.267	-0.283	-0.388	-0.277	-0.32	-0.284	-0.259	-0.305	-0.229
G-protein coupled receptor protein signaling pathway	-0.174	1.322	2.052	0.811	-0.831	-0.142	0.678	0.69	1.373	0.211	-0.151	0.947	0.676	1.194	0.754	0.555	2.075	1.814	0.439	0.594	1.051	1.551	1.248	0.438	0.393	0.617	0.305	-0.927	0.391	0.233	-0.053	1.291	0.365	0.037	1.982
G-protein signaling\, adenylate cyclase activating pathway	-0.055	-0.172	-0.325	-0.217	-0.262	-0.045	-0.231	-0.18	-0.226	-0.228	5.185	-0.16	-0.181	4.057	-0.175	3.198	3.849	3.578	-0.204	-0.189	-0.153	-0.213	-0.235	-0.312	-0.482	-0.187	-0.218	-0.231	-0.317	-0.226	-0.261	-0.232	-0.211	-0.249	-0.187
G-protein signaling\, coupled to cAMP nucleotide second messenger	-0.067	-0.211	-0.398	-0.265	-0.321	-0.055	-0.283	-0.255	-0.319	-0.323	3.394	-0.226	-0.257	2.7	-0.247	2.051	2.544	2.34	-0.288	-0.267	-0.216	3.093	2.758	1.94	0.958	-0.264	-0.308	-0.327	4.24	-0.319	-0.369	2.805	-0.299	2.573	3.588
G-protein signaling\, coupled to cyclic nucleotide second messenger	-0.067	-0.211	-0.398	-0.265	-0.321	-0.055	-0.283	-0.255	-0.319	-0.323	3.394	-0.226	-0.257	2.7	-0.247	2.051	2.544	2.34	-0.288	-0.267	-0.216	3.093	2.758	1.94	0.958	-0.264	-0.308	-0.327	4.24	-0.319	-0.369	2.805	-0.299	2.573	3.588
G-protein signaling\, coupled to IP3 second messenger (phospholipase C activating)	-0.055	-0.172	-0.325	-0.217	-0.262	-0.045	-0.231	-0.18	-0.226	-0.228	-0.386	-0.16	-0.181	-0.239	-0.175	-0.299	-0.252	-0.269	-0.204	-0.189	-0.153	-0.213	-0.235	-0.312	1.836	-0.187	-0.218	-0.231	-0.317	-0.226	-0.261	-0.232	-0.211	-0.249	-0.187
Group I intron splicing	-0.087	-0.272	-0.514	-0.343	-0.415	-0.071	-0.365	-0.312	-0.391	-0.396	-0.668	-0.277	-0.314	-0.415	-0.303	-0.518	-0.436	-0.467	-0.353	-0.327	-0.264	-0.369	-0.408	1.404	0.504	-0.324	-0.377	-0.4	-0.549	-0.391	-0.452	-0.402	-0.366	-0.432	-0.324
Group II intron splicing	-0.039	-0.122	-0.23	-0.153	-0.185	-0.032	-0.163	-0.127	-0.16	-0.161	-0.273	-0.113	-0.128	-0.169	-0.124	-0.211	-0.178	-0.19	-0.144	-0.134	-0.108	-0.151	-0.166	-0.22	-0.34	-0.132	-0.154	-0.163	-0.224	-0.16	-0.185	-0.164	-0.149	-0.176	-0.132
group transfer coenzyme metabolism	-0.241	-0.754	1.565	7.763	-1.149	-0.197	8.215	0.112	-0.338	-0.361	-1.523	0.353	-0.965	-0.457	0.173	-1.589	-0.559	-0.702	-1.084	-1.004	0.449	-0.222	-1.251	0.261	-0.36	0.042	1.521	1.305	2.722	0.525	0.87	0.449	0.714	1.031	1.076
group translocator activity								-0.127	-0.16	-0.161	-0.273	-0.113	-0.128	-0.169	-0.124	-0.211	-0.178	-0.19	-0.144	-0.134	-0.108	-0.151	-0.166	-0.22	-0.34	-0.132	-0.154	-0.163	-0.224	-0.16	-0.185	-0.164	-0.149	-0.176	-0.132
growth	-0.039	-0.122	-0.23	-0.153	-0.185	-0.032	-0.163	-1.28	-1.603	-1.621	-1.541	-1.135	0.318	-1.084	-1.242	-0.617	-1.198	-1.361	-1.447	-1.341	-1.083	0.552	0.211	-0.281	-0.759	-1.326	-0.197	-1.002	-0.824	1.004	0.421	-0.376	-0.113	-1.177	0.236
growth factor activity	-0.358	0.728	2.46	0.813	0.767	-0.292	0.59	-0.127	-0.16	-0.161	-0.273	-0.113	-0.128	-0.169	-0.124	-0.211	-0.178	-0.19	-0.144	-0.134	-0.108	-0.151	-0.166	-0.22	-0.34	-0.132	-0.154	-0.163	-0.224	-0.16	-0.185	-0.164	-0.149	-0.176	-0.132
GTP binding	-0.309	0.1	0.523	0.495	0.67	-0.252	0.315	-0.418	-0.224	-0.257	-0.209	-1.094	-1.241	-0.36	0.515	-1.037	-0.518	0.968	-1.402	-0.501	-1.043	-0.062	-0.341	-1.165	-1.966	-0.467	-0.791	-0.931	-0.24	-0.209	-0.056	-0.285	0.693	-1.09	-0.468
GTP biosynthesis	-0.055	-0.172	-0.325	-0.217	-0.262	-0.045	-0.231	-0.221	-0.276	-0.28	-0.473	-0.196	-0.222	-0.293	-0.214	-0.366	-0.308	-0.33	-0.25	-0.231	-0.187	-0.261	-0.288	-0.382	-0.59	-0.229	-0.267	-0.283	-0.388	-0.277	-0.32	-0.284	-0.259	-0.305	-0.229
GTP cyclohydrolase activity	-0.039	-0.122	-0.23	-0.153	-0.185	-0.032	-0.163	-0.18	-0.226	-0.228	-0.386	-0.16	-0.181	-0.239	-0.175	-0.299	-0.252	-0.269	-0.204	-0.189	-0.153	-0.213	-0.235	-0.312	1.836	-0.187	-0.218	-0.231	-0.317	-0.226	-0.261	-0.232	-0.211	-0.249	-0.187
GTP cyclohydrolase I activity								-0.127	-0.16	-0.161	-0.273	-0.113	-0.128	-0.169	-0.124	-0.211	-0.178	-0.19	-0.144	-0.134	-0.108	-0.151	-0.166	-0.22	-0.34	-0.132	-0.154	-0.163	-0.224	-0.16	-0.185	-0.164	-0.149	-0.176	-0.132
GTP cyclohydrolase II activity	-0.039	-0.122	-0.23	-0.153	-0.185	-0.032	-0.163	-0.127	-0.16	-0.161	-0.273	-0.113	-0.128	-0.169	-0.124	-0.211	-0.178	-0.19	-0.144	-0.134	-0.108	-0.151	-0.166	-0.22	2.937	-0.132	-0.154	-0.163	-0.224	-0.16	-0.185	-0.164	-0.149	-0.176	-0.132
GTP metabolism	-0.055	-0.172	-0.325	-0.217	-0.262	-0.045	-0.231	-0.221	-0.276	-0.28	-0.473	-0.196	-0.222	-0.293	-0.214	-0.366	-0.308	-0.33	-0.25	-0.231	-0.187	-0.261	-0.288	-0.382	-0.59	-0.229	-0.267	-0.283	-0.388	-0.277	-0.32	-0.284	-0.259	-0.305	-0.229
GTPase activator activity	-0.214	0.858	2.096	0.382	1.025	-0.175	0.255	-0.809	-1.013	-1.025	-1.106	-0.718	-0.815	-1.075	-0.785	-1.341	-1.129	-1.209	-0.915	-0.848	-0.685	0.12	-0.075	-0.643	-1.641	-0.838	-0.977	-0.039	-0.678	-1.013	-1.171	-0.047	-0.949	-0.191	0.384
GTPase activity	-0.203	-0.635	-0.313	-0.799	1.187	-0.166	0.364	1.68	1.996	0.955	1.334	-0.727	-0.825	1.769	0.492	-0.583	0.675	0.482	-0.926	0.337	-0.693	0.095	-0.1	-0.67	-1.674	0.359	0.053	-1.05	-1.44	-0.019	-0.308	-0.072	0.112	-1.133	0.358
GTPase binding	-0.103	-0.322	-0.608	-0.406	1.619	-0.084	-0.432	-0.383	-0.479	-0.485	-0.819	-0.339	-0.385	-0.508	-0.371	-0.634	-0.534	-0.572	-0.433	-0.401	-0.324	-0.452	-0.499	-0.661	0.071	-0.396	-0.462	-0.49	-0.673	-0.479	-0.554	-0.492	-0.449	-0.529	-0.397
GTPase regulator activity	-0.271	0.362	1.726	0.873	1.137	-0.221	0.689	-1.026	-1.284	-1.299	-0.709	-0.91	-1.033	-1.363	-0.995	-1.7	-1.432	-1.533	-1.16	-1.075	-0.868	-0.359	-0.561	-1.175	-2.328	-1.063	-1.239	-0.524	-0.624	-0.477	-1.485	-0.532	-1.203	-0.683	-0.095
guanine deaminase activity	-0.039	-0.122	-0.23	-0.153	-0.185	-0.032	-0.163	-0.127	-0.16	-0.161	-0.273	-0.113	-0.128	-0.169	-0.124	-0.211	-0.178	-0.19	-0.144	-0.134	-0.108	-0.151	-0.166	-0.22	-0.34	-0.132	-0.154	-0.163	-0.224	-0.16	-0.185	-0.164	-0.149	-0.176	-0.132
guanine nucleotide transport	-0.039	-0.122	-0.23	-0.153	-0.185	-0.032	-0.163	-0.127	-0.16	-0.161	-0.273	-0.113	-0.128	-0.169	-0.124	-0.211	-0.178	-0.19	-0.144	-0.134	-0.108	-0.151	-0.166	-0.22	-0.34	-0.132	-0.154	-0.163	-0.224	-0.16	-0.185	-0.164	-0.149	-0.176	-0.132
guanine nucleotide transporter activity	-0.039	-0.122	-0.23	-0.153	-0.185	-0.032	-0.163	-0.127	-0.16	-0.161	-0.273	-0.113	-0.128	-0.169	-0.124	-0.211	-0.178	-0.19	-0.144	-0.134	-0.108	-0.151	-0.166	-0.22	-0.34	-0.132	-0.154	-0.163	-0.224	-0.16	-0.185	-0.164	-0.149	-0.176	-0.132
guanosine-diphosphatase activity	-0.039	-0.122	-0.23	-0.153	-0.185	-0.032	-0.163	-0.127	-0.16	-0.161	-0.273	-0.113	-0.128	-0.169	-0.124	-0.211	-0.178	-0.19	-0.144	-0.134	-0.108	-0.151	-0.166	-0.22	-0.34	-0.132	-0.154	-0.163	-0.224	-0.16	-0.185	-0.164	-0.149	-0.176	-0.132
guanyl nucleotide binding	-0.309	0.1	0.523	0.495	0.67	-0.252	0.315	-0.418	-0.224	-0.257	-0.209	-1.094	-1.241	-0.36	0.515	-1.037	-0.518	0.968	-1.402	-0.501	-1.043	-0.062	-0.341	-1.165	-1.966	-0.467	-0.791	-0.931	-0.24	-0.209	-0.056	-0.285	0.693	-1.09	-0.468
guanylate cyclase activity								-0.127	-0.16	-0.161	-0.273	-0.113	-0.128	-0.169	-0.124	-0.211	-0.178	-0.19	-0.144	-0.134	-0.108	-0.151	-0.166	-0.22	-0.34	-0.132	-0.154	-0.163	4.463	-0.16	-0.185	-0.164	-0.149	-0.176	-0.132
guanylate kinase activity								-0.127	-0.16	-0.161	-0.273	-0.113	-0.128	-0.169	-0.124	-0.211	-0.178	-0.19	-0.144	-0.134	-0.108	-0.151	-0.166	-0.22	-0.34	-0.132	-0.154	-0.163	-0.224	-0.16	-0.185	-0.164	-0.149	-0.176	-0.132
guanyl-nucleotide exchange factor activity	-0.156	-0.488	0.227	1.06	0.654	-0.127	0.921	-0.613	-0.767	-0.776	-0.488	-0.543	-0.617	-0.814	-0.594	-1.015	-0.855	-0.915	-0.692	-0.642	-0.518	-0.724	-0.799	-1.059	-1.636	-0.635	-0.74	-0.785	-0.097	0.575	-0.887	-0.788	-0.718	-0.847	-0.635
H3/H4 histone acetyltransferase activity	-0.087	-0.272	-0.514	-0.343	-0.415	-0.071	-0.365	-0.285	-0.357	-0.361	-0.61	-0.253	-0.287	-0.379	-0.277	-0.473	-0.398	-0.426	-0.322	-0.299	-0.241	-0.337	-0.372	-0.493	-0.762	-0.295	-0.344	-0.365	-0.501	-0.357	-0.413	-0.367	-0.334	-0.394	-0.295
half bridge of spindle pole body								-0.221	-0.276	-0.28	1.802	-0.196	-0.222	-0.293	-0.214	-0.366	-0.308	-0.33	-0.25	-0.231	-0.187	3.658	3.28	2.367	1.303	4.221	3.572	3.347	2.319	3.433	2.916	3.333	-0.259	-0.305	4.219
HDEL sequence binding								-0.127	-0.16	-0.161	-0.273	-0.113	-0.128	-0.169	-0.124	-0.211	-0.178	-0.19	-0.144	-0.134	-0.108	-0.151	-0.166	-0.22	-0.34	-0.132	-0.154	-0.163	-0.224	-0.16	-0.185	-0.164	-0.149	-0.176	-0.132
hedgehog receptor activity	-0.039	-0.122	-0.23	-0.153	-0.185	-0.032	-0.163	-0.127	-0.16	-0.161	-0.273	-0.113	-0.128	-0.169	-0.124	-0.211	-0.178	-0.19	-0.144	-0.134	-0.108	-0.151	-0.166	-0.22	-0.34	-0.132	-0.154	-0.163	-0.224	-0.16	-0.185	-0.164	-0.149	-0.176	-0.132
helicase activity	-0.247	-0.774	1.453	-0.974	-1.179	-0.202	-1.037	-1.274	-0.94	-1.613	-1.521	-1.129	-0.474	-1.692	-1.235	2.427	-1.777	-1.903	-1.44	-1.334	-1.077	1.262	1.489	-0.746	3.281	1.037	1.851	-1.632	-2.238	1.025	0.441	-0.361	-1.493	-1.761	0.251
heme a biosynthesis	-0.055	-0.172	2.916	-0.217	-0.262	-0.045	-0.231	-0.255	-0.319	-0.323	-0.546	-0.226	-0.257	-0.339	-0.247	-0.423	-0.356	-0.381	-0.288	-0.267	-0.216	-0.301	-0.333	-0.441	-0.681	-0.264	-0.308	-0.327	-0.448	-0.319	-0.369	-0.328	-0.299	-0.353	-0.264
heme a metabolism	-0.055	-0.172	2.916	-0.217	-0.262	-0.045	-0.231	-0.255	-0.319	-0.323	-0.546	-0.226	-0.257	-0.339	-0.247	-0.423	-0.356	-0.381	-0.288	-0.267	-0.216	-0.301	-0.333	-0.441	-0.681	-0.264	-0.308	-0.327	-0.448	-0.319	-0.369	-0.328	-0.299	-0.353	-0.264
heme binding	-0.087	-0.272	-0.514	-0.343	-0.415	-0.071	-0.365	-0.312	-0.391	-0.396	-0.668	-0.277	-0.314	-0.415	-0.303	-0.518	-0.436	1.756	-0.353	-0.327	-0.264	-0.369	-0.408	-0.54	3.182	-0.324	-0.377	-0.4	-0.549	-0.391	1.836	-0.402	2.428	-0.432	2.822
heme biosynthesis	-0.103	-0.322	2.859	-0.406	-0.491	-0.084	-0.432	-0.478	-0.598	-0.605	1.086	-0.423	-0.481	-0.634	-0.463	0.532	-0.666	-0.713	-0.54	1.54	-0.404	3.067	-0.623	2.995	1.356	1.567	1.202	-0.612	2.924	1.121	0.808	4.414	1.271	0.905	3.627
heme catabolism	-0.039	-0.122	-0.23	-0.153	-0.185	-0.032	-0.163	-0.127	-0.16	-0.161	-0.273	-0.113	-0.128	-0.169	-0.124	-0.211	-0.178	-0.19	-0.144	-0.134	-0.108	-0.151	-0.166	-0.22	2.937	-0.132	-0.154	-0.163	-0.224	-0.16	5.419	-0.164	-0.149	-0.176	-0.132
heme metabolism	-0.11	-0.345	2.593	-0.434	-0.525	-0.09	-0.462	-0.494	-0.619	-0.626	0.979	-0.438	-0.498	-0.657	-0.48	0.459	-0.69	-0.739	-0.559	1.453	-0.418	2.925	-0.645	2.837	2.069	1.48	1.122	-0.633	2.767	1.042	2.182	4.222	1.189	0.829	3.47
heme oxidation	-0.039	-0.122	-0.23	-0.153	-0.185	-0.032	-0.163	-0.127	-0.16	-0.161	-0.273	-0.113	-0.128	-0.169	-0.124	-0.211	-0.178	-0.19	-0.144	-0.134	-0.108	-0.151	-0.166	-0.22	2.937	-0.132	-0.154	-0.163	-0.224	-0.16	5.419	-0.164	-0.149	-0.176	-0.132
heme oxygenase (decyclizing) activity	-0.039	-0.122	-0.23	-0.153	-0.185	-0.032	-0.163	-0.127	-0.16	-0.161	-0.273	-0.113	-0.128	-0.169	-0.124	-0.211	-0.178	-0.19	-0.144	-0.134	-0.108	-0.151	-0.166	-0.22	2.937	-0.132	-0.154	-0.163	-0.224	-0.16	5.419	-0.164	-0.149	-0.176	-0.132
heme transporter activity	-0.039	-0.122	-0.23	-0.153	-0.185	-0.032	-0.163	-0.127	-0.16	-0.161	-0.273	-0.113	-0.128	-0.169	-0.124	-0.211	-0.178	-0.19	-0.144	-0.134	-0.108	-0.151	-0.166	-0.22	-0.34	-0.132	-0.154	-0.163	-0.224	-0.16	-0.185	-0.164	-0.149	-0.176	-0.132
heme-copper terminal oxidase activity	-0.11	-0.345	-0.65	-0.434	-0.525	-0.09	-0.462	-0.494	1.042	1.017	-0.039	1.878	-0.498	0.914	1.643	-0.819	2.309	3.482	-0.559	-0.518	2.007	-0.584	-0.645	0.376	0.374	-0.512	-0.597	2.617	0.343	-0.619	-0.716	-0.636	-0.58	0.829	-0.512
heterochromatin	-0.291	0.222	-1.715	-1.144	-0.628	-0.237	0.489	-0.338	2.007	-0.427	-0.722	-0.299	-0.34	-0.448	-0.327	-0.559	-0.471	-0.504	-0.381	-0.353	-0.285	-0.399	-0.44	-0.583	0.338	-0.35	-0.408	-0.432	-0.593	-0.423	-0.489	-0.434	-0.396	-0.467	-0.35
heterochromatin formation	-0.067	-0.211	-0.398	-0.265	-0.321	-0.055	-0.283	-0.157	0.141	-0.64	0.903	0.083	-1.104	-0.741	-0.096	-1.817	-0.847	-0.997	-1.24	-1.149	-0.928	-1.296	-1.431	-1.895	-2.156	-1.136	-1.325	-1.405	-1.927	-1.373	-1.587	-0.672	-1.286	-1.516	-1.136
heterocycle catabolism	-0.087	-0.272	-0.514	-0.343	-0.415	-0.071	-0.365	-0.285	-0.357	-0.361	-0.61	-0.253	-0.287	2.339	3.397	-0.473	-0.398	-0.426	-0.322	-0.299	-0.241	-0.337	-0.372	1.636	0.705	-0.295	-0.344	-0.365	3.693	-0.357	-0.413	-0.367	-0.334	4.839	-0.295
heterocycle metabolism	-0.309	-0.966	0.523	-0.36	-1.472	-0.252	-0.49	0.665	0.027	-0.005	2.468	0.003	1.545	-0.139	1.685	0.911	-0.936	0.145	0.316	2.261	1.161	0.958	-0.789	1.803	1.781	0.564	1.636	-0.037	3.307	0.027	0.888	1.372	0.213	2.399	0.563
heteroduplex formation	-0.067	-0.211	-0.398	-0.265	-0.321	-0.055	-0.283	-0.221	-0.276	-0.28	-0.473	-0.196	-0.222	-0.293	-0.214	-0.366	-0.308	-0.33	-0.25	-0.231	-0.187	-0.261	-0.288	-0.382	5.088	-0.229	-0.267	-0.283	-0.388	-0.277	-0.32	-0.284	-0.259	-0.305	-0.229
heterogeneous nuclear ribonucleoprotein complex	-0.055	-0.172	-0.325	-0.217	-0.262	-0.045	-0.231	-0.18	-0.226	-0.228	-0.386	-0.16	-0.181	-0.239	-0.175	-0.299	-0.252	-0.269	-0.204	-0.189	-0.153	-0.213	-0.235	-0.312	-0.482	-0.187	-0.218	-0.231	-0.317	-0.226	-0.261	-0.232	-0.211	-0.249	-0.187
heterophilic cell adhesion	-0.11	-0.345	-0.65	-0.434	-0.525	-0.09	-0.462	-0.423	-0.53	-0.536	2.661	-0.375	-0.426	-0.562	-0.411	-0.701	-0.591	-0.632	-0.478	-0.443	-0.358	-0.5	-0.552	-0.731	0.848	-0.438	-0.511	1.355	-0.744	-0.53	-0.613	-0.544	1.568	1.18	-0.439
heterotrimeric G-protein complex								-0.221	-0.276	-0.28	-0.473	-0.196	-0.222	-0.293	-0.214	-0.366	-0.308	-0.33	-0.25	-0.231	-0.187	3.658	3.28	2.367	-0.59	4.221	3.572	-0.283	-0.388	3.433	2.916	3.333	3.691	-0.305	4.219
hexadecanal biosynthesis	-0.039	-0.122	4.353	-0.153	-0.185	-0.032	-0.163	-0.127	-0.16	-0.161	-0.273	-0.113	-0.128	-0.169	-0.124	-0.211	-0.178	-0.19	-0.144	-0.134	-0.108	-0.151	-0.166	-0.22	-0.34	-0.132	-0.154	-0.163	-0.224	-0.16	-0.185	-0.164	-0.149	-0.176	-0.132
hexadecanal metabolism	-0.039	-0.122	4.353	-0.153	-0.185	-0.032	-0.163	-0.127	-0.16	-0.161	-0.273	-0.113	-0.128	-0.169	-0.124	-0.211	-0.178	-0.19	-0.144	-0.134	-0.108	-0.151	-0.166	-0.22	-0.34	-0.132	-0.154	-0.163	-0.224	-0.16	-0.185	-0.164	-0.149	-0.176	-0.132
hexaprenyldihydroxybenzoate methyltransferase activity	-0.039	-0.122	-0.23	-0.153	-0.185	-0.032	-0.163	-0.127	-0.16	-0.161	-0.273	-0.113	-0.128	-0.169	-0.124	-0.211	-0.178	-0.19	-0.144	-0.134	-0.108	-0.151	-0.166	-0.22	-0.34	-0.132	-0.154	-0.163	-0.224	-0.16	-0.185	-0.164	-0.149	-0.176	-0.132
hexitol dehydrogenase activity	-0.039	-0.122	-0.23	-0.153	-0.185	-0.032	-0.163	-0.127	-0.16	-0.161	-0.273	-0.113	-0.128	-0.169	-0.124	-0.211	-0.178	-0.19	-0.144	-0.134	-0.108	-0.151	-0.166	-0.22	-0.34	-0.132	-0.154	-0.163	-0.224	-0.16	-0.185	-0.164	-0.149	-0.176	-0.132
hexokinase activity	-0.087	-0.272	-0.514	-0.343	-0.415	-0.071	-0.365	10.413	5.392	5.325	-0.61	7.763	-0.287	7.776	7.07	-0.473	4.791	6.877	6.016	-0.299	8.152	-0.337	-0.372	-0.493	-0.762	-0.295	-0.344	-0.365	-0.501	-0.357	-0.413	-0.367	-0.334	-0.394	-0.295
hexose biosynthesis	-0.17	-0.532	-1.004	-0.669	-0.81	-0.139	-0.713	0.959	1.776	0.465	-0.577	-0.567	-0.63	1.587	1.026	-0.067	1.433	1.227	0.742	-0.656	1.389	-0.755	-0.833	-1.104	2.236	0.883	-0.772	0.442	0.756	-0.8	-0.925	-0.805	-0.734	0.331	0.927
hexose catabolism	-0.224	0.754	-0.524	1.452	-1.07	-0.183	0.158	2.672	1.767	0.782	-0.691	3.262	-0.855	2.445	2.805	-1.439	3.081	3.537	1.185	-0.889	2.248	-1.026	-1.133	0.613	2.534	4.878	2.889	0.749	9.579	1.767	1.232	1.752	4.182	5.909	-0.849
hexose metabolism	-0.363	-0.221	0.874	0.037	-1.117	-0.296	-0.831	3.366	2.753	2.062	-0.132	2.362	-1.321	3.604	2.742	-1.226	3.27	3.891	1.322	-1.375	1.733	-0.901	-1.123	0.043	3.212	3.19	2.312	1.385	6.867	0.861	0.83	1.413	3.203	3.397	0.207
hexose transport	-0.123	-0.385	-0.727	-0.485	-0.587	-0.101	-0.517	8.602	6.686	5.137	-0.286	5.683	1.26	6.242	5.121	0.214	5.886	5.42	5.883	4.673	5.996	-0.658	0.694	-0.962	0.773	-0.577	-0.672	0.732	1.176	0.779	0.482	-0.716	-0.653	-0.77	-0.577
hexose transporter activity	-0.135	-0.422	-0.797	-0.531	-0.643	-0.11	-0.566	7.218	5.584	5.508	0.787	6.062	1.394	6.68	5.473	0.329	4.9	4.5	4.567	5.004	6.39	-0.622	0.814	-0.91	0.983	-0.545	-0.636	0.853	1.352	0.901	0.599	-0.677	-0.617	-0.728	-0.545
high affinity iron ion transport	-0.095	-0.298	-0.563	-0.375	-0.455	-0.078	2.169	-0.312	-0.391	-0.396	-0.668	-0.277	-0.314	-0.415	-0.303	-0.518	-0.436	-0.467	-0.353	-0.327	-0.264	5.174	4.641	-0.54	-0.834	-0.324	2.338	-0.4	3.28	4.857	6.414	-0.402	2.428	4.346	2.822
high affinity zinc uptake transporter activity	-0.039	-0.122	-0.23	-0.153	-0.185	-0.032	-0.163	-0.127	-0.16	6.194	3.666	8.846	7.793	5.906	8.087	4.734	5.621	5.251	-0.144	7.49	9.273	-0.151	-0.166	-0.22	-0.34	-0.132	-0.154	-0.163	-0.224	-0.16	-0.185	-0.164	-0.149	-0.176	-0.132
high-affinity zinc ion transport	-0.039	-0.122	-0.23	-0.153	-0.185	-0.032	-0.163	-0.127	-0.16	6.194	3.666	8.846	7.793	5.906	8.087	4.734	5.621	5.251	-0.144	7.49	9.273	-0.151	-0.166	-0.22	-0.34	-0.132	-0.154	-0.163	-0.224	-0.16	-0.185	-0.164	-0.149	-0.176	-0.132
histidine biosynthesis	-0.146	-0.456	0.366	-0.574	-0.695	-0.119	-0.612	-0.511	-0.639	0.944	-0.107	-0.453	-0.514	-0.678	-0.495	1.63	-0.713	-0.763	-0.577	-0.535	-0.432	-0.604	-0.666	-0.883	-1.364	-0.529	-0.617	-0.654	-0.897	-0.639	-0.739	-0.657	-0.599	-0.706	-0.529
histidine family amino acid biosynthesis	-0.146	-0.456	0.366	-0.574	-0.695	-0.119	-0.612	-0.511	-0.639	0.944	-0.107	-0.453	-0.514	-0.678	-0.495	1.63	-0.713	-0.763	-0.577	-0.535	-0.432	-0.604	-0.666	-0.883	-1.364	-0.529	-0.617	-0.654	-0.897	-0.639	-0.739	-0.657	-0.599	-0.706	-0.529
histidine family amino acid metabolism	-0.146	-0.456	0.366	-0.574	-0.695	-0.119	-0.612	-0.511	-0.639	0.944	-0.107	-0.453	-0.514	-0.678	-0.495	1.63	-0.713	-0.763	-0.577	-0.535	-0.432	-0.604	-0.666	-0.883	-1.364	-0.529	-0.617	-0.654	-0.897	-0.639	-0.739	-0.657	-0.599	-0.706	-0.529
histidine metabolism	-0.146	-0.456	0.366	-0.574	-0.695	-0.119	-0.612	-0.511	-0.639	0.944	-0.107	-0.453	-0.514	-0.678	-0.495	1.63	-0.713	-0.763	-0.577	-0.535	-0.432	-0.604	-0.666	-0.883	-1.364	-0.529	-0.617	-0.654	-0.897	-0.639	-0.739	-0.657	-0.599	-0.706	-0.529
histidine-tRNA ligase activity								-0.127	-0.16	-0.161	-0.273	-0.113	-0.128	-0.169	-0.124	-0.211	-0.178	-0.19	-0.144	-0.134	-0.108	-0.151	-0.166	-0.22	-0.34	-0.132	-0.154	-0.163	-0.224	-0.16	-0.185	-0.164	-0.149	-0.176	-0.132
histidinol dehydrogenase activity	-0.039	-0.122	-0.23	-0.153	-0.185	-0.032	-0.163	-0.127	-0.16	6.194	-0.273	-0.113	-0.128	-0.169	-0.124	-0.211	-0.178	-0.19	-0.144	-0.134	-0.108	-0.151	-0.166	-0.22	-0.34	-0.132	-0.154	-0.163	-0.224	-0.16	-0.185	-0.164	-0.149	-0.176	-0.132
histidinol-phosphatase activity	-0.039	-0.122	-0.23	-0.153	-0.185	-0.032	-0.163	-0.127	-0.16	-0.161	-0.273	-0.113	-0.128	-0.169	-0.124	-0.211	-0.178	-0.19	-0.144	-0.134	-0.108	-0.151	-0.166	-0.22	-0.34	-0.132	-0.154	-0.163	-0.224	-0.16	-0.185	-0.164	-0.149	-0.176	-0.132
histidinol-phosphate transaminase activity	-0.039	-0.122	-0.23	-0.153	-0.185	-0.032	-0.163	-0.127	-0.16	-0.161	-0.273	-0.113	-0.128	-0.169	-0.124	-0.211	-0.178	-0.19	-0.144	-0.134	-0.108	-0.151	-0.166	-0.22	-0.34	-0.132	-0.154	-0.163	-0.224	-0.16	-0.185	-0.164	-0.149	-0.176	-0.132
histidyl-tRNA aminoacylation								-0.127	-0.16	-0.161	-0.273	-0.113	-0.128	-0.169	-0.124	-0.211	-0.178	-0.19	-0.144	-0.134	-0.108	-0.151	-0.166	-0.22	-0.34	-0.132	-0.154	-0.163	-0.224	-0.16	-0.185	-0.164	-0.149	-0.176	-0.132
histone acetylation	-0.156	7.862	7.115	-0.614	-0.743	-0.127	-0.654	-0.664	-0.831	-0.841	-1.421	-0.589	-0.668	-0.882	-0.644	-1.1	-0.927	-0.992	-0.751	-0.695	-0.562	-0.785	-0.866	-1.148	-1.141	-0.688	-0.802	-0.851	-1.167	-0.831	-0.961	-0.854	-0.778	-0.918	-0.688
histone acetyltransferase activity	-0.141	1.875	0.443	-0.553	-0.67	-0.115	-0.589	-0.542	-0.678	-0.686	-1.159	-0.48	-0.545	-0.719	-0.525	-0.898	-0.756	-0.809	-0.612	-0.567	-0.458	-0.64	-0.707	-0.936	-0.673	-0.561	-0.654	-0.694	-0.952	-0.678	-0.784	-0.697	-0.635	-0.749	-0.561
histone acetyltransferase complex	-0.183	8.336	6.757	-0.72	-0.872	-0.149	-0.768	-0.757	-0.947	-0.958	-1.619	-0.671	-0.762	-1.005	-0.734	-1.254	-1.056	-1.13	-0.855	-0.792	-0.64	-0.894	-0.987	-1.308	-0.909	-0.784	-0.914	-0.969	-1.33	-0.947	-1.095	-0.973	-0.887	-1.046	-0.784
histone binding	-0.039	-0.122	4.353	-0.153	-0.185	-0.032	-0.163	-0.255	-0.319	-0.323	-0.546	-0.226	-0.257	-0.339	-0.247	-0.423	-0.356	-0.381	-0.288	-0.267	-0.216	-0.301	-0.333	-0.441	0.958	-0.264	-0.308	-0.327	-0.448	-0.319	-0.369	-0.328	-0.299	-0.353	-0.264
histone deacetylase activity	-0.146	1.775	-0.861	-0.574	-0.695	-0.119	-0.612	-0.511	-0.639	-0.647	-1.093	-0.453	-0.514	-0.678	-0.495	-0.846	-0.713	-0.763	-0.577	-0.535	-0.432	-0.604	-0.666	-0.883	-1.364	-0.529	-0.617	-0.654	-0.897	-0.639	-0.739	-0.657	-0.599	-0.706	-0.529
histone deacetylase complex	-0.161	1.522	-0.949	-0.633	-0.766	-0.131	-0.674	-0.542	-0.678	-0.686	-1.159	-0.48	-0.545	-0.719	-0.525	-0.898	-0.756	-0.809	-0.612	-0.567	-0.458	-0.64	-0.707	-0.936	-1.447	-0.561	-0.654	-0.694	-0.952	-0.678	-0.784	-0.697	-0.635	-0.749	-0.561
histone deacetylation	-0.11	-0.345	-0.65	-0.434	-0.525	-0.09	-0.462	-0.383	-0.479	-0.485	-0.819	-0.339	-0.385	-0.508	-0.371	-0.634	-0.534	-0.572	-0.433	-0.401	-0.324	-0.452	-0.499	-0.661	-1.022	-0.396	-0.462	-0.49	-0.673	-0.479	-0.554	-0.492	-0.449	-0.529	-0.397
histone dephosphorylation	-0.055	-0.172	-0.325	-0.217	-0.262	-0.045	-0.231	-0.18	-0.226	-0.228	-0.386	-0.16	-0.181	-0.239	-0.175	-0.299	-0.252	-0.269	-0.204	-0.189	-0.153	-0.213	-0.235	-0.312	-0.482	-0.187	-0.218	-0.231	-0.317	-0.226	-0.261	-0.232	-0.211	-0.249	-0.187
histone lysine N-methyltransferase activity (H3-K4 specific)	-0.095	-0.298	-0.563	-0.375	-0.455	-0.078	2.169	-0.361	-0.452	-0.457	2.015	-0.32	-0.363	-0.479	-0.35	-0.598	-0.504	-0.539	-0.408	-0.378	-0.305	-0.427	-0.471	-0.624	-0.964	-0.374	-0.436	-0.462	-0.634	-0.452	-0.522	-0.464	-0.423	-0.499	-0.374
histone methylation	-0.123	-0.385	-0.727	-0.485	-0.587	-0.101	1.474	-0.442	-0.553	-0.56	2.469	-0.392	-0.445	-0.587	-0.429	-0.733	-0.617	-0.66	-0.5	-0.463	-0.374	-0.523	-0.577	-0.764	-1.181	-0.458	-0.534	-0.566	-0.777	-0.554	-0.64	-0.569	-0.518	-0.611	-0.458
histone methyltransferase activity	-0.117	-0.366	-0.69	-0.46	-0.557	-0.095	1.609	-0.423	-0.53	-0.536	2.661	-0.375	-0.426	-0.562	-0.411	-0.701	-0.591	-0.632	-0.478	-0.443	-0.358	-0.5	-0.552	-0.731	-1.13	-0.438	-0.511	-0.542	-0.744	-0.53	-0.613	-0.544	-0.496	-0.585	-0.439
[truncated: 2,411 more rows]
